# Supplementary material for: Transposable elements are the primary source of novelty in primate gene regulation
Source: Genome Res. 2017 Oct;27(10):1623–33. doi: 10.1101/gr.218149.116 (PMC5630026; doi:10.1101/gr.218149.116)
Supplement: Supplemental Material [file supp_gr.218149.116_Supplemental_TABLE_S1.xlsx]

## Sheet: Samples_database
#Information on samples used for analyses
SPECIES	ID	GENDER	AGE	CAUSE OF DEATH	SOURCE
Mouse lemur (Microcebus murinus)	ML_CITRONELLA	F	4.8	spleen abnormal (increased extramedullary hematopoiesis); liver and kidney with mass but histopath showed no remarkable lesions	Duke
Mouse lemur (Microcebus murinus)	ML_7022f_Basil	F	9.1	squamous cell carcinoma of face (maxilla, nasal cavity, skin) but rest of tissues normal	Duke
Mouse lemur (Microcebus murinus)	ML_WILBUR	M	10	cause of death: kidney infection; also had pnemonia	Duke
Mouse lemur (Microcebus murinus)	ML_ALFA_ALFA	M	NO INFO	unknown	Duke
Bushbaby (Otolemur garnettii)	BB_8012	M	1m23d	unknown	Duke
Bushbaby (Otolemur garnettii)	BB_1413m_Tuff	M	7.2	unknown	Duke
Bushbaby (Otolemur garnettii)	BB_1409m_Mica	M	12.9	unknown	Duke
Chimp (Pan troglodites)	CH_4X0523	F	10	Respiratory distress, Myocarditis	Texas Biomed
Chimp (Pan troglodites)	CH_40191	F	43	Cardiomiopathy	Texas Biomed
Chimp (Pan troglodites)	CH_4X0430	F	17	Kidney disease and sepsis	Texas Biomed
Chimp (Pan troglodites)	CH_4X0519	M	20	Heart failure	Texas Biomed
Rheshus macaque (Macaca mulatta)	RH_27415	F	4.1	unknown	Texas Biomed
Rheshus macaque (Macaca mulatta)	RH_27418	F	4.9	unknown	Texas Biomed
Rheshus macaque (Macaca mulatta)	RH_27425	M	4.6	unknown	Texas Biomed
Marmoset (Callithrix jacchus)	MS_17086	F	3	unknown	Texas Biomed
Marmoset (Callithrix jacchus)	MS_31480	M	3	unknown	Texas Biomed
Marmoset (Callithrix jacchus)	MS_32842	M	1.9	unknown	Texas Biomed
Homo sapiens	HS_B2	F	45	Date of transplant 9/5/2014	Penn Transplant center
Homo sapiens	HS_B16	F	17	Date of transplant 12/7/2014	Penn Transplant center
Homo sapiens	HS_B48	M	34	Date of transplant 10/31/2014	Penn Transplant center
48

## Sheet: RNA-seq
#RNA-seq stats
SPECIES	BARCODE	POOL	ID SAMPLE	Total reads	Aln-reads	aln after q10
BB	CCGTCC(C)	1	1409m_Mica	41.163	33.7324	30.8006
BB	ACAGTG(A)	1	1413m_Tuff	36.3401	23.2955	21.4456
CH	GTCCGC(A)	2	4X0430	49.2986	42.03	41.4601
CH	AGTCAA(C)	1	4X0519	26.2428	9.8234	8.06707
CH	TGACCA(A)	1	4X0523	66.86	61.2404	50.1046
HS	TGACCA(A)	2	B16	39.7964	41.7282	34.7574
HS	ATGTCA(G)	1	B2	58.32	53.8408	43.4729
HS	CGATGT(A)	1	B48	45.4766	41.32	37.3857
ML	CAGATC(A)	2	ALFA_ALFA	34.0874	30.54	22.8243
ML	CTTGTA(A)	1	7022f_Basil	44.9418	39.71	32.8417
ML	AGTCAA(C)	2	CITRONELLA	35.4434	32.12	25.3075
ML	GTGAAA(C)	1	WILBUR	39.1704	33.76	28.0196
MS	CGATGT(A)	2	17086	45.2892	45.1844	37.3565
MS	GCCAAT(A)	2	31480	46.7396	41.27	40.2953
MS	AGTTCC(G)	1	32842	39.8393	27.12	35.188
RH	CAGATC(A)	1	27415	40.0327	36.12	33.203
RH	GTGAAA(C)	2	27418	54.1672	52.71	42.2639
RH	ATGTCA(G)	2	27425	32.8298	30.12	27.8341
			AVERAGE	43.1133	37.537	32.9238

## Sheet: CHIP-seq
#ChIP-seq stats
SPECIES	BARCODE	SAMPLE_ID	Total reads	Aln-reads	Aln-reads after rmdup	Aln-reads after q10
BB	TAATGCGC-CCTATCCT	1413m_Tuff_H3K27Ac	88.0108	77.6204	31.927	27.5
BB	CGGCTATG-CCTATCCT	1413m_Tuff_H3K4me1	30.014	22.8369	18.1701	15.4
BB	TCCGCGAA-CCTATCCT	1413m_Tuff_INPUT	35.0952	34.8241	31.5146	25.4
BB	ATTACTCG-CAGGACGT	8012_H3K27Ac	33.3599	25.1474	21.9632	18.9
BB	TCCGGAGA-CAGGACGT	8012_H3K4me1	33.7808	26.801	23.1963	20.1
BB	CGCTCATT-CAGGACGT	8012_INPUT	33.3	16.69	14.6	11.4
CH	TCCGCGAA-CAGGACGT	40191_H3K27Ac	30.37	26.58	19.04	15.1
CH	TCTCGCGC-CAGGACGT	40191_H3K4me1	35.32	35.05	22.06	16.4
CH	AGCGATAG-CAGGACGT	40191_INPUT	66.06	66.17	43.3	30.1
CH	TCCGGAGA-GGCTCTGA	4X0430_H3K27Ac	50.4483	30.7154	20.2999	15.9
CH	CGCTCATT-GGCTCTGA	4X0430_H3K4me1	32.14	26	19.3	15
CH	GAGATTCC-GGCTCTGA	4X0430_INPUT	63.12	54.6	39.2	27.4
HS	TCCGCGAA-TATAGCCT	B16_H3K27Ac	29.99	28.98	18.84	17.5
HS	TCTCGCGC-TATAGCCT	B16_H3K4me1	35.6369	28.5457	18.939	14.9
HS	AGCGATAG-TATAGCCT	B16_INPUT	147.695	145.125	120.583	98.3
HS	CTGAAGCT-TATAGCCT	B2_H3K27Ac	20.03	19.19	17.27	15.4
HS	TAATGCGC-TATAGCCT	B2_H3K4me1	27.57	25.29	21.77	19.2
HS	CGGCTATG-TATAGCCT	B2_INPUT	42.7474	40.5357	34.9431	28
HS	CGGCTATG-ATAGAGGC	B48_H3K27Ac	99.6277	97.9251	78.7245	70.5
HS	TCCGCGAA-ATAGAGGC	B48_H3K4me1	8.7	7	4	3.3
HS	CGGCTATG-TAATCTTA	B48_INPUT	24.4855	24.3273	21.1812	16.6
ML	TCTCGCGC-GGCTCTGA	7022f_Basil_H3K27Ac	43.8051	23.1911	18.6424	16.3
ML	AGCGATAG-GGCTCTGA	7022f_Basil_H3K4me1	29.3	24.53	21.32	19.9
ML	ATTACTCG-AGGCGAAG	7022f_Basil_INPUT	32.4425	27.1569	23.9306	19.8
ML	GAGATTCC-CAGGACGT	ALFA_ALFA_H3K27Ac	55.6775	52.9392	32.0738	28.7
ML	ATTCAGAA-CAGGACGT	ALFA_ALFA_H3K4me1	40.95	34.3	28.42	27
ML	GAATTCGT-CAGGACGT	ALFA_ALFA_INPUT	33.1105	27.6018	22.7027	20.5
MS	ATTACTCG-GTACTGAC	17086_H3K27Ac	29.4983	25.5482	22.0894	17.9
MS	TCCGGAGA-GTACTGAC	17086_H3K4me1	31.2	22.3	16.95	13.8
MS	CGCTCATT-GTACTGAC	17086_INPUT	68.29	17.1539	15.6348	11.5
MS	TCTCGCGC-AGGCGAAG	31480_H3K27Ac	14.2168	12.5825	11.6392	10.1
MS	AGCGATAG-AGGCGAAG	31480_H3K4me1	21.6371	18.6299	16.3709	13.6
MS	ATTACTCG-TAATCTTA	31480_INPUT	23.2849	19.5916	18.1135	15.7
MS	ATTCAGAA-AGGCGAAG	32842_H3K27Ac	33.8752	24.4982	21.4443	19.3
MS	GAATTCGT-AGGCGAAG	32842_H3K4me1	48.1	20.92	16.71	13.8
MS	CTGAAGCT-AGGCGAAG	32842_INPUT	37.6545	33.8746	31.1311	26.1
RH	CGCTCATT-CCTATCCT	27415_H3K27Ac	18.38	12.08	8.65	7.9
RH	CGGCTATG-AGGCGAAG	27415_H3K4me1	50.1	20.08	13.95	9.1
RH	TCCGCGAA-AGGCGAAG	27415_INPUT	36.9323	33.0658	25.4486	23.7
RH	GAATTCGT-TAATCTTA	27425_H3K27Ac	16.8	15.9	14.8	13.3
RH	CTGAAGCT-TAATCTTA	27425_H3K4me1	14.98	13.45	12.28	11.1
RH	TAATGCGC-TAATCTTA	27425_INPUT	30.9832	30.1323	17.4326	14.6
	AVERAGE		39.9695	32.6067	25.0132	20.8571

## Sheet: Individual_FDR5_PEAKS_stats
						#ChIP-seq QC summary statistics
SPECIES	SAMPLE_ID	Passed_FastQC_filtering_H3K27Ac	27Ac FRIP(1%)	27Ac_NSC (>1.05)	27Ac_RSC(>0.8)	27Ac RSC Qtag	Passed_FastQC_filtering_H3K4me1	me1 FRIP(1%)	me1_NSC (>1.05)	me1_RSC(>0.8)	me1RSC Qtag
BB	8012	YES	5.74	1.2	1.3	1	YES	1.56	1.06	1.09	1
BB	1413m_Tuff	YES	11.45	1.46	1.34	1	YES	7	1.23	1.21	1
CH	40191	YES	6.15657	1.08062	0.87	0	YES	11.32	1.08	0.82	0
CH	4X0430	YES	18.98	1.67	1.5	2	YES	10.0906	1.08	0.82	0
HS	B2	YES	33.52	1.24	1.39	1	YES	4.76	1.05	1.82	2
HS	B16	YES	53.12	2.12	1.16	1	NO	NA	NA	NA	NA
HS	B48	NO	NA	NA	NA	NA	YES	21.12	1.82	1.57	2
ML	7022f_Basil	YES	15.39	1.27	0.86	0	YES	19.84	1.18	1	1
ML	ALFA_ALFA	YES	12.43	1.22	1.18	1	YES	14.4693	1.32	1.36	1
MS	17086	YES	4.54	1.15	1.25	1	YES	1.99	1.08567	0.89	0
MS	31480	NO	NA	NA	NA	NA	YES	1.92	1.05	0.93	0
MS	32842	YES	7.89	1.16	1.16	1	NO	NA	NA	NA	NA
RH	27415	YES	43.12	1.53202	1.35091	1	YES	9.12	1.10667	1.34694	1
RH	27425	YES	6.46	1.05597	1.11247	1	YES	5.34	1.0846	1.21	1
Normalized strand cross-correlation coefficient (NSC): normalized ratio between the fragment-length cross-correlation peak and the background cross-correlation
Relative strand cross-correlation coefficient (RSC): ratio between the fragment-length peak and the read-length peak
Qtag codes: -2: very Low, -1: Low, 0: Medium, 1: High, 2: very High)
