# Supplementary material for: Transposable elements are the primary source of novelty in primate gene regulation
Source: Genome Res. 2017 Oct;27(10):1623–33. doi: 10.1101/gr.218149.116 (PMC5630026; doi:10.1101/gr.218149.116)
Supplement: Supplemental Material [file supp_gr.218149.116_Supplemental_TABLE_S6.xlsx]

## Sheet: overlap_tested_MPRA_unique_peak
# Results and summary statistics of MPRA experiments
chr_tested_element	start_tested_element	end_tested_element	effect_size	p-value	chr_overlapping_CRE	start_overlapping_CRE	end_overlapping_CRE	ID_OVERLAPPING_CREs
11	1302595	1303595	3.87065	3.17e-63	11	1294569	1311071	HS_cons_H3K27Ac_FDR5_q10_CSpeaks_peak_21834;HS_cons_H3K27Ac_FDR5_q10_CSpeaks_peak_21835;HS_cons_H3K27Ac_FDR5_q10_CSpeaks_peak_21836
17	1715456	1716456	3.84214	9.36e-53	17	1711823	1721268	HS_cons_H3K27Ac_FDR5_q10_CSpeaks_peak_56135;HS_cons_H3K27Ac_FDR5_q10_CSpeaks_peak_56136;HS_cons_H3K27Ac_FDR5_q10_CSpeaks_peak_56137;HS_cons_H3K27Ac_FDR5_q10_CSpeaks_peak_56138;HS_cons_H3K27Ac_FDR5_q10_CSpeaks_peak_56139
20	3783153	3784153	3.10258	3.12e-98	20	3782571	3787625	HS_cons_H3K27Ac_FDR5_q10_CSpeaks_peak_87335;HS_cons_H3K27Ac_FDR5_q10_CSpeaks_peak_87336;HS_cons_H3K27Ac_FDR5_q10_CSpeaks_peak_87337
3	184298472	184299472	3.00722	0	3	184297757	184300422	HS_cons_H3K27Ac_FDR5_q10_CSpeaks_peak_106723
2	227717452	227718452	2.99145	0	2	227716429	227719691	HS_cons_H3K27Ac_FDR5_q10_CSpeaks_peak_84549
1	156249219	156250219	2.98017	5.19e-66	1	156240743	156252167	HS_cons_H3K27Ac_FDR5_q10_CSpeaks_peak_9732;HS_cons_H3K27Ac_FDR5_q10_CSpeaks_peak_9733;HS_cons_H3K27Ac_FDR5_q10_CSpeaks_peak_9734;HS_cons_H3K27Ac_FDR5_q10_CSpeaks_peak_9735;HS_cons_H3K27Ac_FDR5_q10_CSpeaks_peak_9736;HS_cons_H3K27Ac_FDR5_q10_CSpeaks_peak_9737;HS_cons_H3K27Ac_FDR5_q10_CSpeaks_peak_9738;HS_cons_H3K27Ac_FDR5_q10_CSpeaks_peak_9739;HS_cons_H3K27Ac_FDR5_q10_CSpeaks_peak_9740;HS_cons_H3K2…
16	1772936	1773936	2.64748	6.86e-58	16	1760029	1796129	HS_cons_H3K27Ac_FDR5_q10_CSpeaks_peak_49002;HS_cons_H3K27Ac_FDR5_q10_CSpeaks_peak_49003;HS_cons_H3K27Ac_FDR5_q10_CSpeaks_peak_49004;HS_cons_H3K27Ac_FDR5_q10_CSpeaks_peak_49005;HS_cons_H3K27Ac_FDR5_q10_CSpeaks_peak_49006;HS_cons_H3K27Ac_FDR5_q10_CSpeaks_peak_49007;HS_cons_H3K27Ac_FDR5_q10_CSpeaks_peak_49008;HS_cons_H3K27Ac_FDR5_q10_CSpeaks_peak_49009
10	118755256	118756256	2.60353	1.65e-64	10	118753440	118756584	HS_cons_H3K27Ac_FDR5_q10_CSpeaks_peak_19129
15	40693370	40694370	2.47864	3.15e-53	15	40693716	40696212	HS_cons_H3K27Ac_FDR5_q10_CSpeaks_peak_44394
10	71342704	71343704	2.45253	6.35e-66	10	71341987	71343332	HS_cons_H3K27Ac_FDR5_q10_CSpeaks_peak_16549
16	1509299	1510299	2.4454	0	16	1504411	1514170	HS_cons_H3K27Ac_FDR5_q10_CSpeaks_peak_48909;HS_cons_H3K27Ac_FDR5_q10_CSpeaks_peak_48910;HS_cons_H3K27Ac_FDR5_q10_CSpeaks_peak_48911;HS_cons_H3K27Ac_FDR5_q10_CSpeaks_peak_48912;HS_cons_H3K27Ac_FDR5_q10_CSpeaks_peak_48913;HS_cons_H3K27Ac_FDR5_q10_CSpeaks_peak_48914
16	84144619	84145619	2.4232	1.19e-164	16	84143731	84146271	HS_cons_H3K27Ac_FDR5_q10_CSpeaks_peak_53743
3	119647426	119648426	2.4027	4.19e-104	3	119647693	119648975	HS_cons_H3K27Ac_FDR5_q10_CSpeaks_peak_104540
1	37474135	37475135	2.38179	0	1	37473385	37488606	HS_cons_H3K27Ac_FDR5_q10_CSpeaks_peak_6041;HS_cons_H3K27Ac_FDR5_q10_CSpeaks_peak_6042;HS_cons_H3K27Ac_FDR5_q10_CSpeaks_peak_6043;HS_cons_H3K27Ac_FDR5_q10_CSpeaks_peak_6044;HS_cons_H3K27Ac_FDR5_q10_CSpeaks_peak_6045
21	41741430	41742430	2.31452	0	21	41740932	41747457	HS_cons_H3K27Ac_FDR5_q10_CSpeaks_peak_93090;HS_cons_H3K27Ac_FDR5_q10_CSpeaks_peak_93091;HS_cons_H3K27Ac_FDR5_q10_CSpeaks_peak_93092;HS_cons_H3K27Ac_FDR5_q10_CSpeaks_peak_93093;HS_cons_H3K27Ac_FDR5_q10_CSpeaks_peak_93094
10	102727268	102728268	2.2419	8.74e-271	10	102726391	102727686	HS_cons_H3K27Ac_FDR5_q10_CSpeaks_peak_18530
9	35800905	35801905	2.19171	0	9	35800072	35801391	HS_cons_H3K27Ac_FDR5_q10_CSpeaks_peak_138640
22	23305433	23306433	2.19001	0	22	23304528	23310011	HS_cons_H3K27Ac_FDR5_q10_CSpeaks_peak_95645;HS_cons_H3K27Ac_FDR5_q10_CSpeaks_peak_95646;HS_cons_H3K27Ac_FDR5_q10_CSpeaks_peak_95647
9	137085871	137086871	2.15368	0	9	137085239	137088242	HS_cons_H3K27Ac_FDR5_q10_CSpeaks_peak_144691
16	57417552	57418552	2.13278	1.25e-77	16	57412664	57420320	HS_cons_H3K27Ac_FDR5_q10_CSpeaks_peak_52186;HS_cons_H3K27Ac_FDR5_q10_CSpeaks_peak_52187;HS_cons_H3K27Ac_FDR5_q10_CSpeaks_peak_52188;HS_cons_H3K27Ac_FDR5_q10_CSpeaks_peak_52189;HS_cons_H3K27Ac_FDR5_q10_CSpeaks_peak_52190
7	100041290	100042290	2.10525	4.35e-180	7	100041494	100043575	HS_cons_H3K27Ac_FDR5_q10_CSpeaks_peak_128899;HS_cons_H3K27Ac_FDR5_q10_CSpeaks_peak_128900
1	15756705	15757705	2.0542	0	1	15755813	15761864	HS_cons_H3K27Ac_FDR5_q10_CSpeaks_peak_3125;HS_cons_H3K27Ac_FDR5_q10_CSpeaks_peak_3126;HS_cons_H3K27Ac_FDR5_q10_CSpeaks_peak_3127;HS_cons_H3K27Ac_FDR5_q10_CSpeaks_peak_3128
5	139439066	139440066	2.0503	4.22e-172	5	139437470	139440469	HS_cons_H3K27Ac_FDR5_q10_CSpeaks_peak_115557;HS_cons_H3K27Ac_FDR5_q10_CSpeaks_peak_115558
6	33761808	33762808	2.0402	0	6	33760245	33763916	HS_cons_H3K27Ac_FDR5_q10_CSpeaks_peak_119921
1	161726568	161727568	2.03416	1.21e-123	1	161725180	161728343	HS_cons_H3K27Ac_FDR5_q10_CSpeaks_peak_10138
10	70564437	70565437	2.03237	0	10	70558704	70567309	HS_cons_H3K27Ac_FDR5_q10_CSpeaks_peak_16383;HS_cons_H3K27Ac_FDR5_q10_CSpeaks_peak_16384;HS_cons_H3K27Ac_FDR5_q10_CSpeaks_peak_16385;HS_cons_H3K27Ac_FDR5_q10_CSpeaks_peak_16386;HS_cons_H3K27Ac_FDR5_q10_CSpeaks_peak_16387;HS_cons_H3K27Ac_FDR5_q10_CSpeaks_peak_16388;HS_cons_H3K27Ac_FDR5_q10_CSpeaks_peak_16389;HS_cons_H3K27Ac_FDR5_q10_CSpeaks_peak_16390;HS_cons_H3K27Ac_FDR5_q10_CSpeaks_peak_16391
6	7590063	7591063	2.02625	0	6	7589442	7591572	HS_cons_H3K27Ac_FDR5_q10_CSpeaks_peak_118752
16	1995919	1996919	2.00533	1.81e-122	16	1996581	2001081	HS_cons_H3K27Ac_FDR5_q10_CSpeaks_peak_49069;HS_cons_H3K27Ac_FDR5_q10_CSpeaks_peak_49070
12	122085234	122086234	2.00139	0	12	122086225	122088862	HS_cons_H3K27Ac_FDR5_q10_CSpeaks_peak_34388;HS_cons_H3K27Ac_FDR5_q10_CSpeaks_peak_34389
17	7280666	7281666	1.97887	0	17	7279949	7286604	HS_cons_H3K27Ac_FDR5_q10_CSpeaks_peak_56975;HS_cons_H3K27Ac_FDR5_q10_CSpeaks_peak_56976;HS_cons_H3K27Ac_FDR5_q10_CSpeaks_peak_56977;HS_cons_H3K27Ac_FDR5_q10_CSpeaks_peak_56978
1	175043834	175044834	1.96151	0	1	175043434	175045743	HS_cons_H3K27Ac_FDR5_q10_CSpeaks_peak_10446;HS_cons_H3K27Ac_FDR5_q10_CSpeaks_peak_10447
19	10567597	10568597	1.95522	0	19	10564553	10570496	HS_cons_H3K27Ac_FDR5_q10_CSpeaks_peak_70343;HS_cons_H3K27Ac_FDR5_q10_CSpeaks_peak_70344
17	34960889	34961889	1.92874	4.49e-293	17	34960336	34962736	HS_cons_H3K27Ac_FDR5_q10_CSpeaks_peak_59052
17	36486344	36487344	1.92181	2.47e-60	17	36485934	36488365	HS_cons_H3K27Ac_FDR5_q10_CSpeaks_peak_59136
19	45818760	45819760	1.90207	0	19	45813955	45822439	HS_cons_H3K27Ac_FDR5_q10_CSpeaks_peak_74426;HS_cons_H3K27Ac_FDR5_q10_CSpeaks_peak_74427;HS_cons_H3K27Ac_FDR5_q10_CSpeaks_peak_74428;HS_cons_H3K27Ac_FDR5_q10_CSpeaks_peak_74429;HS_cons_H3K27Ac_FDR5_q10_CSpeaks_peak_74430;HS_cons_H3K27Ac_FDR5_q10_CSpeaks_peak_74431;HS_cons_H3K27Ac_FDR5_q10_CSpeaks_peak_74432
17	79730413	79731413	1.89603	0	17	79727607	79735895	HS_cons_H3K27Ac_FDR5_q10_CSpeaks_peak_63768;HS_cons_H3K27Ac_FDR5_q10_CSpeaks_peak_63769;HS_cons_H3K27Ac_FDR5_q10_CSpeaks_peak_63770;HS_cons_H3K27Ac_FDR5_q10_CSpeaks_peak_63771
3	196503568	196504568	1.87522	0	3	196500106	196504886	HS_cons_H3K27Ac_FDR5_q10_CSpeaks_peak_107442;HS_cons_H3K27Ac_FDR5_q10_CSpeaks_peak_107443
3	156815529	156816529	1.85089	3.87e-120	3	156814330	156818051	HS_cons_H3K27Ac_FDR5_q10_CSpeaks_peak_106321
11	65551930	65552930	1.84727	0	11	65549990	65561938	HS_cons_H3K27Ac_FDR5_q10_CSpeaks_peak_25377;HS_cons_H3K27Ac_FDR5_q10_CSpeaks_peak_25378;HS_cons_H3K27Ac_FDR5_q10_CSpeaks_peak_25379;HS_cons_H3K27Ac_FDR5_q10_CSpeaks_peak_25380
19	32869894	32870894	1.8289	0	19	32867850	32871872	HS_cons_H3K27Ac_FDR5_q10_CSpeaks_peak_72551;HS_cons_H3K27Ac_FDR5_q10_CSpeaks_peak_72552
20	62370258	62371258	1.82274	0	20	62349470	62382354	HS_cons_H3K27Ac_FDR5_q10_CSpeaks_peak_91319;HS_cons_H3K27Ac_FDR5_q10_CSpeaks_peak_91320;HS_cons_H3K27Ac_FDR5_q10_CSpeaks_peak_91321;HS_cons_H3K27Ac_FDR5_q10_CSpeaks_peak_91322;HS_cons_H3K27Ac_FDR5_q10_CSpeaks_peak_91323;HS_cons_H3K27Ac_FDR5_q10_CSpeaks_peak_91324
19	41618817	41619817	1.80901	0	19	41618872	41622336	HS_cons_H3K27Ac_FDR5_q10_CSpeaks_peak_73788;HS_cons_H3K27Ac_FDR5_q10_CSpeaks_peak_73789
17	4897863	4898863	1.80508	0	17	4890915	4903992	HS_cons_H3K27Ac_FDR5_q10_CSpeaks_peak_56703;HS_cons_H3K27Ac_FDR5_q10_CSpeaks_peak_56704;HS_cons_H3K27Ac_FDR5_q10_CSpeaks_peak_56705;HS_cons_H3K27Ac_FDR5_q10_CSpeaks_peak_56706;HS_cons_H3K27Ac_FDR5_q10_CSpeaks_peak_56707;HS_cons_H3K27Ac_FDR5_q10_CSpeaks_peak_56708
1	246781978	246782978	1.80198	1.15e-139	1	246781236	246783236	HS_cons_H3K27Ac_FDR5_q10_CSpeaks_peak_13445;HS_cons_H3K27Ac_FDR5_q10_CSpeaks_peak_13446
11	119084315	119085315	1.77755	0	11	119083453	119086376	HS_cons_H3K27Ac_FDR5_q10_CSpeaks_peak_28522
12	120325092	120326092	1.76169	0	12	120325273	120326763	HS_cons_H3K27Ac_FDR5_q10_CSpeaks_peak_34137
16	70724881	70725881	1.76	0	16	70720951	70731753	HS_cons_H3K27Ac_FDR5_q10_CSpeaks_peak_53088;HS_cons_H3K27Ac_FDR5_q10_CSpeaks_peak_53089;HS_cons_H3K27Ac_FDR5_q10_CSpeaks_peak_53090;HS_cons_H3K27Ac_FDR5_q10_CSpeaks_peak_53091;HS_cons_H3K27Ac_FDR5_q10_CSpeaks_peak_53092;HS_cons_H3K27Ac_FDR5_q10_CSpeaks_peak_53093;HS_cons_H3K27Ac_FDR5_q10_CSpeaks_peak_53094
2	241770985	241771985	1.75873	0	2	241767580	241778927	HS_cons_H3K27Ac_FDR5_q10_CSpeaks_peak_86810;HS_cons_H3K27Ac_FDR5_q10_CSpeaks_peak_86811;HS_cons_H3K27Ac_FDR5_q10_CSpeaks_peak_86812;HS_cons_H3K27Ac_FDR5_q10_CSpeaks_peak_86813;HS_cons_H3K27Ac_FDR5_q10_CSpeaks_peak_86814
19	58440022	58441022	1.7492	1.47e-283	19	58439048	58441797	HS_cons_H3K27Ac_FDR5_q10_CSpeaks_peak_76227
12	121788997	121789997	1.73648	0	12	121787938	121815428	HS_cons_H3K27Ac_FDR5_q10_CSpeaks_peak_34329;HS_cons_H3K27Ac_FDR5_q10_CSpeaks_peak_34330;HS_cons_H3K27Ac_FDR5_q10_CSpeaks_peak_34331;HS_cons_H3K27Ac_FDR5_q10_CSpeaks_peak_34332;HS_cons_H3K27Ac_FDR5_q10_CSpeaks_peak_34333;HS_cons_H3K27Ac_FDR5_q10_CSpeaks_peak_34334;HS_cons_H3K27Ac_FDR5_q10_CSpeaks_peak_34335;HS_cons_H3K27Ac_FDR5_q10_CSpeaks_peak_34336
22	49152535	49153542	1.73229	0	22	49149463	49153296	HS_cons_H3K27Ac_FDR5_q10_CSpeaks_peak_100139;HS_cons_H3K27Ac_FDR5_q10_CSpeaks_peak_100140;HS_cons_H3K27Ac_FDR5_q10_CSpeaks_peak_100141;HS_cons_H3K27Ac_FDR5_q10_CSpeaks_peak_100142
21	43753907	43754907	1.72928	0	21	43746883	43763523	HS_cons_H3K27Ac_FDR5_q10_CSpeaks_peak_93576;HS_cons_H3K27Ac_FDR5_q10_CSpeaks_peak_93577;HS_cons_H3K27Ac_FDR5_q10_CSpeaks_peak_93578;HS_cons_H3K27Ac_FDR5_q10_CSpeaks_peak_93579;HS_cons_H3K27Ac_FDR5_q10_CSpeaks_peak_93580;HS_cons_H3K27Ac_FDR5_q10_CSpeaks_peak_93581;HS_cons_H3K27Ac_FDR5_q10_CSpeaks_peak_93582;HS_cons_H3K27Ac_FDR5_q10_CSpeaks_peak_93583;HS_cons_H3K27Ac_FDR5_q10_CSpeaks_peak_93584;HS_…
22	26672637	26673637	1.72639	0	22	26670663	26674271	HS_cons_H3K27Ac_FDR5_q10_CSpeaks_peak_96114;HS_cons_H3K27Ac_FDR5_q10_CSpeaks_peak_96115
19	54172959	54173960	1.72594	0	19	54171202	54175188	HS_cons_H3K27Ac_FDR5_q10_CSpeaks_peak_75740;HS_cons_H3K27Ac_FDR5_q10_CSpeaks_peak_75741;HS_cons_H3K27Ac_FDR5_q10_CSpeaks_peak_75742
8	144461107	144462107	1.7248	1.16e-252	8	144447455	144470950	HS_cons_H3K27Ac_FDR5_q10_CSpeaks_peak_137816;HS_cons_H3K27Ac_FDR5_q10_CSpeaks_peak_137817;HS_cons_H3K27Ac_FDR5_q10_CSpeaks_peak_137818;HS_cons_H3K27Ac_FDR5_q10_CSpeaks_peak_137819;HS_cons_H3K27Ac_FDR5_q10_CSpeaks_peak_137820;HS_cons_H3K27Ac_FDR5_q10_CSpeaks_peak_137821;HS_cons_H3K27Ac_FDR5_q10_CSpeaks_peak_137822;HS_cons_H3K27Ac_FDR5_q10_CSpeaks_peak_137823;HS_cons_H3K27Ac_FDR5_q10_CSpeaks_peak_1…
20	62201664	62202664	1.71279	0	20	62202107	62204634	HS_cons_H3K4me1_FDR5_q10_CSpeaks_peak_62422;HS_cons_H3K4me1_FDR5_q10_CSpeaks_peak_62423
19	10251513	10252513	1.6957	0	19	10249999	10253882	HS_cons_H3K27Ac_FDR5_q10_CSpeaks_peak_70265;HS_cons_H3K27Ac_FDR5_q10_CSpeaks_peak_70266
16	56450890	56451890	1.68858	0	16	56450198	56452731	HS_cons_H3K27Ac_FDR5_q10_CSpeaks_peak_52029
17	79797946	79798946	1.68738	0	17	79794259	79802040	HS_cons_H3K27Ac_FDR5_q10_CSpeaks_peak_63790;HS_cons_H3K27Ac_FDR5_q10_CSpeaks_peak_63791;HS_cons_H3K27Ac_FDR5_q10_CSpeaks_peak_63792;HS_cons_H3K27Ac_FDR5_q10_CSpeaks_peak_63793
8	27672443	27673443	1.68655	0	8	27668691	27674073	HS_cons_H3K27Ac_FDR5_q10_CSpeaks_peak_133640;HS_cons_H3K27Ac_FDR5_q10_CSpeaks_peak_133641;HS_cons_H3K27Ac_FDR5_q10_CSpeaks_peak_133642;HS_cons_H3K27Ac_FDR5_q10_CSpeaks_peak_133643
17	76688505	76689505	1.68497	0	17	76681172	76690154	HS_cons_H3K27Ac_FDR5_q10_CSpeaks_peak_62929;HS_cons_H3K27Ac_FDR5_q10_CSpeaks_peak_62930;HS_cons_H3K27Ac_FDR5_q10_CSpeaks_peak_62931;HS_cons_H3K27Ac_FDR5_q10_CSpeaks_peak_62932;HS_cons_H3K27Ac_FDR5_q10_CSpeaks_peak_62933;HS_cons_H3K27Ac_FDR5_q10_CSpeaks_peak_62934
1	234373029	234374029	1.67468	0	1	234372465	234374701	HS_cons_H3K27Ac_FDR5_q10_CSpeaks_peak_12999
17	76697598	76698598	1.65554	0	17	76694983	76699205	HS_cons_H3K27Ac_FDR5_q10_CSpeaks_peak_62935;HS_cons_H3K27Ac_FDR5_q10_CSpeaks_peak_62936;HS_cons_H3K27Ac_FDR5_q10_CSpeaks_peak_62937
11	61756160	61757160	1.65395	0	11	61751666	61767839	HS_cons_H3K27Ac_FDR5_q10_CSpeaks_peak_24622;HS_cons_H3K27Ac_FDR5_q10_CSpeaks_peak_24623;HS_cons_H3K27Ac_FDR5_q10_CSpeaks_peak_24624;HS_cons_H3K27Ac_FDR5_q10_CSpeaks_peak_24625;HS_cons_H3K27Ac_FDR5_q10_CSpeaks_peak_24626;HS_cons_H3K27Ac_FDR5_q10_CSpeaks_peak_24627
16	30007144	30008144	1.65367	0	16	30000764	30008432	HS_cons_H3K27Ac_FDR5_q10_CSpeaks_peak_51088;HS_cons_H3K27Ac_FDR5_q10_CSpeaks_peak_51089;HS_cons_H3K27Ac_FDR5_q10_CSpeaks_peak_51090;HS_cons_H3K27Ac_FDR5_q10_CSpeaks_peak_51091;HS_cons_H3K27Ac_FDR5_q10_CSpeaks_peak_51092;HS_cons_H3K27Ac_FDR5_q10_CSpeaks_peak_51093
10	7787781	7788781	1.64739	0	10	7786769	7789604	HS_cons_H3K27Ac_FDR5_q10_CSpeaks_peak_14318
11	8692006	8693006	1.64422	0	11	8692993	8694361	HS_cons_H3K27Ac_FDR5_q10_CSpeaks_peak_22756
19	3120022	3121022	1.64319	0	19	3092880	3124942	HS_cons_H3K27Ac_FDR5_q10_CSpeaks_peak_68819;HS_cons_H3K27Ac_FDR5_q10_CSpeaks_peak_68820;HS_cons_H3K27Ac_FDR5_q10_CSpeaks_peak_68821;HS_cons_H3K27Ac_FDR5_q10_CSpeaks_peak_68822;HS_cons_H3K27Ac_FDR5_q10_CSpeaks_peak_68823;HS_cons_H3K27Ac_FDR5_q10_CSpeaks_peak_68824;HS_cons_H3K27Ac_FDR5_q10_CSpeaks_peak_68825;HS_cons_H3K27Ac_FDR5_q10_CSpeaks_peak_68826;HS_cons_H3K27Ac_FDR5_q10_CSpeaks_peak_68827;HS_…
14	102225448	102226448	1.63978	0	14	102225417	102228371	HS_cons_H3K27Ac_FDR5_q10_CSpeaks_peak_42496;HS_cons_H3K27Ac_FDR5_q10_CSpeaks_peak_42497
12	54586966	54587966	1.63902	1.42e-232	12	54587051	54589433	HS_cons_H3K27Ac_FDR5_q10_CSpeaks_peak_32132
2	119680824	119681824	1.63438	0	2	119680404	119684354	HS_cons_H3K27Ac_FDR5_q10_CSpeaks_peak_81897;HS_cons_H3K27Ac_FDR5_q10_CSpeaks_peak_81898;HS_cons_H3K27Ac_FDR5_q10_CSpeaks_peak_81899
19	16111815	16112815	1.63007	0	19	16110007	16113153	HS_cons_H3K27Ac_FDR5_q10_CSpeaks_peak_71237;HS_cons_H3K27Ac_FDR5_q10_CSpeaks_peak_71238
10	86970233	86971233	1.6276	0	10	86965932	86973043	HS_cons_H3K27Ac_FDR5_q10_CSpeaks_peak_17692
3	50286369	50287369	1.62274	5.75e-185	3	50286013	50304573	HS_cons_H3K27Ac_FDR5_q10_CSpeaks_peak_103138;HS_cons_H3K27Ac_FDR5_q10_CSpeaks_peak_103139;HS_cons_H3K27Ac_FDR5_q10_CSpeaks_peak_103140;HS_cons_H3K27Ac_FDR5_q10_CSpeaks_peak_103141;HS_cons_H3K27Ac_FDR5_q10_CSpeaks_peak_103142;HS_cons_H3K27Ac_FDR5_q10_CSpeaks_peak_103143;HS_cons_H3K27Ac_FDR5_q10_CSpeaks_peak_103144;HS_cons_H3K27Ac_FDR5_q10_CSpeaks_peak_103145
7	152463948	152464948	1.62088	0	7	152462197	152465691	HS_cons_H3K27Ac_FDR5_q10_CSpeaks_peak_130987;HS_cons_H3K27Ac_FDR5_q10_CSpeaks_peak_130988
19	58554633	58555633	1.61184	0	19	58553399	58560918	HS_cons_H3K27Ac_FDR5_q10_CSpeaks_peak_76252
22	50436012	50437012	1.59879	0	22	50434550	50449233	HS_cons_H3K27Ac_FDR5_q10_CSpeaks_peak_100582;HS_cons_H3K27Ac_FDR5_q10_CSpeaks_peak_100583;HS_cons_H3K27Ac_FDR5_q10_CSpeaks_peak_100584;HS_cons_H3K27Ac_FDR5_q10_CSpeaks_peak_100585;HS_cons_H3K27Ac_FDR5_q10_CSpeaks_peak_100586
1	180270945	180271945	1.59396	0	1	180270542	180272785	HS_cons_H3K27Ac_FDR5_q10_CSpeaks_peak_10621
19	55385210	55386210	1.59123	0	19	55382697	55391296	HS_cons_H3K27Ac_FDR5_q10_CSpeaks_peak_75953;HS_cons_H3K27Ac_FDR5_q10_CSpeaks_peak_75954;HS_cons_H3K27Ac_FDR5_q10_CSpeaks_peak_75955;HS_cons_H3K27Ac_FDR5_q10_CSpeaks_peak_75956
17	4950222	4951222	1.58847	0	17	4943920	4954539	HS_cons_H3K27Ac_FDR5_q10_CSpeaks_peak_56714;HS_cons_H3K27Ac_FDR5_q10_CSpeaks_peak_56715;HS_cons_H3K27Ac_FDR5_q10_CSpeaks_peak_56716;HS_cons_H3K27Ac_FDR5_q10_CSpeaks_peak_56717;HS_cons_H3K27Ac_FDR5_q10_CSpeaks_peak_56718;HS_cons_H3K27Ac_FDR5_q10_CSpeaks_peak_56719
14	102922401	102923401	1.58749	0	14	102921937	102926133	HS_cons_H3K27Ac_FDR5_q10_CSpeaks_peak_42616;HS_cons_H3K27Ac_FDR5_q10_CSpeaks_peak_42617
5	149272341	149273341	1.58583	0	5	149270716	149273603	HS_cons_H3K27Ac_FDR5_q10_CSpeaks_peak_115984
1	53115458	53116458	1.58534	5.87e-127	1	53112885	53118689	HS_cons_H3K27Ac_FDR5_q10_CSpeaks_peak_7239;HS_cons_H3K27Ac_FDR5_q10_CSpeaks_peak_7240
16	1449101	1450101	1.58481	0	16	1448164	1453501	HS_cons_H3K27Ac_FDR5_q10_CSpeaks_peak_48880;HS_cons_H3K27Ac_FDR5_q10_CSpeaks_peak_48881;HS_cons_H3K27Ac_FDR5_q10_CSpeaks_peak_48882;HS_cons_H3K27Ac_FDR5_q10_CSpeaks_peak_48883;HS_cons_H3K27Ac_FDR5_q10_CSpeaks_peak_48884
4	2401199	2402199	1.58211	0	4	2400627	2404002	HS_cons_H3K27Ac_FDR5_q10_CSpeaks_peak_108242;HS_cons_H3K27Ac_FDR5_q10_CSpeaks_peak_108243
22	30667643	30668643	1.58182	0	22	30666790	30669256	HS_cons_H3K27Ac_FDR5_q10_CSpeaks_peak_96568
19	5563524	5564524	1.58002	0	19	5562470	5563793	HS_cons_H3K27Ac_FDR5_q10_CSpeaks_peak_69499
17	39676199	39677199	1.57972	0	17	39669413	39680695	HS_cons_H3K27Ac_FDR5_q10_CSpeaks_peak_59482;HS_cons_H3K27Ac_FDR5_q10_CSpeaks_peak_59483;HS_cons_H3K27Ac_FDR5_q10_CSpeaks_peak_59484;HS_cons_H3K27Ac_FDR5_q10_CSpeaks_peak_59485;HS_cons_H3K27Ac_FDR5_q10_CSpeaks_peak_59486;HS_cons_H3K27Ac_FDR5_q10_CSpeaks_peak_59487;HS_cons_H3K27Ac_FDR5_q10_CSpeaks_peak_59488
9	105655969	105656969	1.57771	0	9	105655512	105657181	HS_cons_H3K27Ac_FDR5_q10_CSpeaks_peak_140595
1	155061737	155062737	1.57718	0	1	155060319	155064935	HS_cons_H3K27Ac_FDR5_q10_CSpeaks_peak_9576
10	70670902	70671902	1.57554	2.04e-07	10	70670043	70671316	HS_cons_H3K27Ac_FDR5_q10_CSpeaks_peak_16400
10	69635314	69636314	1.57472	0	10	69633609	69636581	HS_cons_H3K27Ac_FDR5_q10_CSpeaks_peak_16236;HS_cons_H3K27Ac_FDR5_q10_CSpeaks_peak_16237
22	50205704	50206704	1.57051	0	22	50203589	50211554	HS_cons_H3K27Ac_FDR5_q10_CSpeaks_peak_100502;HS_cons_H3K27Ac_FDR5_q10_CSpeaks_peak_100503
5	177408789	177409789	1.5688	0	5	177408206	177411113	HS_cons_H3K27Ac_FDR5_q10_CSpeaks_peak_117412;HS_cons_H3K27Ac_FDR5_q10_CSpeaks_peak_117413
16	84184507	84185507	1.56798	0	16	84174957	84187853	HS_cons_H3K27Ac_FDR5_q10_CSpeaks_peak_53744;HS_cons_H3K27Ac_FDR5_q10_CSpeaks_peak_53745;HS_cons_H3K27Ac_FDR5_q10_CSpeaks_peak_53746;HS_cons_H3K27Ac_FDR5_q10_CSpeaks_peak_53747;HS_cons_H3K27Ac_FDR5_q10_CSpeaks_peak_53748;HS_cons_H3K27Ac_FDR5_q10_CSpeaks_peak_53749;HS_cons_H3K27Ac_FDR5_q10_CSpeaks_peak_53750
15	90884547	90885547	1.56571	0	15	90868883	90888064	HS_cons_H3K27Ac_FDR5_q10_CSpeaks_peak_47579;HS_cons_H3K27Ac_FDR5_q10_CSpeaks_peak_47580;HS_cons_H3K27Ac_FDR5_q10_CSpeaks_peak_47581;HS_cons_H3K27Ac_FDR5_q10_CSpeaks_peak_47582;HS_cons_H3K27Ac_FDR5_q10_CSpeaks_peak_47583;HS_cons_H3K27Ac_FDR5_q10_CSpeaks_peak_47584;HS_cons_H3K27Ac_FDR5_q10_CSpeaks_peak_47585
17	74865708	74866708	1.55904	0	17	74858341	74867421	HS_cons_H3K27Ac_FDR5_q10_CSpeaks_peak_62479;HS_cons_H3K27Ac_FDR5_q10_CSpeaks_peak_62480;HS_cons_H3K27Ac_FDR5_q10_CSpeaks_peak_62481;HS_cons_H3K27Ac_FDR5_q10_CSpeaks_peak_62482;HS_cons_H3K27Ac_FDR5_q10_CSpeaks_peak_62483;HS_cons_H3K27Ac_FDR5_q10_CSpeaks_peak_62484;HS_cons_H3K27Ac_FDR5_q10_CSpeaks_peak_62485
4	107720022	107721022	1.55869	0	4	107719075	107721755	HS_cons_H3K27Ac_FDR5_q10_CSpeaks_peak_111042
16	89132203	89133203	1.55387	0	16	89131820	89134223	HS_cons_H3K27Ac_FDR5_q10_CSpeaks_peak_55335;HS_cons_H3K27Ac_FDR5_q10_CSpeaks_peak_55336
5	43192346	43193346	1.54876	2e-60	5	43191317	43193579	HS_cons_H3K27Ac_FDR5_q10_CSpeaks_peak_113972
16	67657247	67658247	1.54659	0	16	67655785	67670338	HS_cons_H3K27Ac_FDR5_q10_CSpeaks_peak_52730;HS_cons_H3K27Ac_FDR5_q10_CSpeaks_peak_52731;HS_cons_H3K27Ac_FDR5_q10_CSpeaks_peak_52732;HS_cons_H3K27Ac_FDR5_q10_CSpeaks_peak_52733;HS_cons_H3K27Ac_FDR5_q10_CSpeaks_peak_52734;HS_cons_H3K27Ac_FDR5_q10_CSpeaks_peak_52735;HS_cons_H3K27Ac_FDR5_q10_CSpeaks_peak_52736
2	172084075	172085075	1.54257	0	2	172082584	172089206	HS_cons_H3K27Ac_FDR5_q10_CSpeaks_peak_83319;HS_cons_H3K27Ac_FDR5_q10_CSpeaks_peak_83320;HS_cons_H3K27Ac_FDR5_q10_CSpeaks_peak_83321;HS_cons_H3K27Ac_FDR5_q10_CSpeaks_peak_83322;HS_cons_H3K27Ac_FDR5_q10_CSpeaks_peak_83323;HS_cons_H3K27Ac_FDR5_q10_CSpeaks_peak_83324
2	240895799	240896799	1.54231	0	2	240885092	240901332	HS_cons_H3K27Ac_FDR5_q10_CSpeaks_peak_86558;HS_cons_H3K27Ac_FDR5_q10_CSpeaks_peak_86559;HS_cons_H3K27Ac_FDR5_q10_CSpeaks_peak_86560;HS_cons_H3K27Ac_FDR5_q10_CSpeaks_peak_86561;HS_cons_H3K27Ac_FDR5_q10_CSpeaks_peak_86562;HS_cons_H3K27Ac_FDR5_q10_CSpeaks_peak_86563
8	27772434	27773434	1.53956	0	8	27771320	27773488	HS_cons_H3K27Ac_FDR5_q10_CSpeaks_peak_133647
16	1768912	1769912	1.53459	0	16	1760029	1796129	HS_cons_H3K27Ac_FDR5_q10_CSpeaks_peak_49002;HS_cons_H3K27Ac_FDR5_q10_CSpeaks_peak_49003;HS_cons_H3K27Ac_FDR5_q10_CSpeaks_peak_49004;HS_cons_H3K27Ac_FDR5_q10_CSpeaks_peak_49005;HS_cons_H3K27Ac_FDR5_q10_CSpeaks_peak_49006;HS_cons_H3K27Ac_FDR5_q10_CSpeaks_peak_49007;HS_cons_H3K27Ac_FDR5_q10_CSpeaks_peak_49008;HS_cons_H3K27Ac_FDR5_q10_CSpeaks_peak_49009
17	82414624	82415624	1.53253	0	17	82414086	82416291	HS_cons_H3K4me1_FDR5_q10_CSpeaks_peak_43734
21	46183158	46184158	1.53123	0	21	46179171	46185733	HS_cons_H3K27Ac_FDR5_q10_CSpeaks_peak_94371;HS_cons_H3K27Ac_FDR5_q10_CSpeaks_peak_94372;HS_cons_H3K27Ac_FDR5_q10_CSpeaks_peak_94373;HS_cons_H3K27Ac_FDR5_q10_CSpeaks_peak_94374;HS_cons_H3K27Ac_FDR5_q10_CSpeaks_peak_94375
2	55232192	55233192	1.5248	0	2	55231367	55233977	HS_cons_H3K27Ac_FDR5_q10_CSpeaks_peak_79342
17	50675319	50676319	1.52303	0	17	50672247	50676982	HS_cons_H3K27Ac_FDR5_q10_CSpeaks_peak_61105;HS_cons_H3K27Ac_FDR5_q10_CSpeaks_peak_61106;HS_cons_H3K27Ac_FDR5_q10_CSpeaks_peak_61107
11	120336577	120337577	1.51703	0	11	120334858	120338031	HS_cons_H3K27Ac_FDR5_q10_CSpeaks_peak_28737
17	35243037	35244037	1.51625	8.17e-227	17	35240904	35244299	HS_cons_H3K27Ac_FDR5_q10_CSpeaks_peak_59070
1	153614982	153615982	1.51527	0	1	153614495	153618388	HS_cons_H3K27Ac_FDR5_q10_CSpeaks_peak_9349
7	102465286	102466286	1.51304	0	7	102463675	102466629	HS_cons_H3K27Ac_FDR5_q10_CSpeaks_peak_129343
12	132067385	132068385	1.50617	0	12	132066209	132070306	HS_cons_H3K27Ac_FDR5_q10_CSpeaks_peak_35493;HS_cons_H3K27Ac_FDR5_q10_CSpeaks_peak_35494
12	47779323	47780323	1.50086	0	12	47772397	47787468	HS_cons_H3K27Ac_FDR5_q10_CSpeaks_peak_31286;HS_cons_H3K27Ac_FDR5_q10_CSpeaks_peak_31287;HS_cons_H3K27Ac_FDR5_q10_CSpeaks_peak_31288;HS_cons_H3K27Ac_FDR5_q10_CSpeaks_peak_31289;HS_cons_H3K27Ac_FDR5_q10_CSpeaks_peak_31290;HS_cons_H3K27Ac_FDR5_q10_CSpeaks_peak_31291;HS_cons_H3K27Ac_FDR5_q10_CSpeaks_peak_31292;HS_cons_H3K27Ac_FDR5_q10_CSpeaks_peak_31293;HS_cons_H3K27Ac_FDR5_q10_CSpeaks_peak_31294;HS_…
5	141944563	141945563	1.50034	0	5	141944854	141946566	HS_cons_H3K27Ac_FDR5_q10_CSpeaks_peak_115843
1	5995690	5996690	1.50018	0	1	5990841	6003834	HS_cons_H3K27Ac_FDR5_q10_CSpeaks_peak_1586;HS_cons_H3K27Ac_FDR5_q10_CSpeaks_peak_1587;HS_cons_H3K27Ac_FDR5_q10_CSpeaks_peak_1588;HS_cons_H3K27Ac_FDR5_q10_CSpeaks_peak_1589;HS_cons_H3K27Ac_FDR5_q10_CSpeaks_peak_1590;HS_cons_H3K27Ac_FDR5_q10_CSpeaks_peak_1591;HS_cons_H3K27Ac_FDR5_q10_CSpeaks_peak_1592;HS_cons_H3K27Ac_FDR5_q10_CSpeaks_peak_1593
1	2189441	2190441	1.49899	0	1	2187290	2217482	HS_cons_H3K27Ac_FDR5_q10_CSpeaks_peak_501;HS_cons_H3K27Ac_FDR5_q10_CSpeaks_peak_502;HS_cons_H3K27Ac_FDR5_q10_CSpeaks_peak_503;HS_cons_H3K27Ac_FDR5_q10_CSpeaks_peak_504;HS_cons_H3K27Ac_FDR5_q10_CSpeaks_peak_505;HS_cons_H3K27Ac_FDR5_q10_CSpeaks_peak_506;HS_cons_H3K27Ac_FDR5_q10_CSpeaks_peak_507
1	161222690	161223690	1.49824	0	1	161222291	161229930	HS_cons_H3K27Ac_FDR5_q10_CSpeaks_peak_10094;HS_cons_H3K27Ac_FDR5_q10_CSpeaks_peak_10095;HS_cons_H3K27Ac_FDR5_q10_CSpeaks_peak_10096;HS_cons_H3K27Ac_FDR5_q10_CSpeaks_peak_10097;HS_cons_H3K27Ac_FDR5_q10_CSpeaks_peak_10098;HS_cons_H3K27Ac_FDR5_q10_CSpeaks_peak_10099
16	84179082	84180082	1.49632	0	16	84174957	84187853	HS_cons_H3K27Ac_FDR5_q10_CSpeaks_peak_53744;HS_cons_H3K27Ac_FDR5_q10_CSpeaks_peak_53745;HS_cons_H3K27Ac_FDR5_q10_CSpeaks_peak_53746;HS_cons_H3K27Ac_FDR5_q10_CSpeaks_peak_53747;HS_cons_H3K27Ac_FDR5_q10_CSpeaks_peak_53748;HS_cons_H3K27Ac_FDR5_q10_CSpeaks_peak_53749;HS_cons_H3K27Ac_FDR5_q10_CSpeaks_peak_53750
16	87870275	87871275	1.48185	2.95e-160	16	87868006	87872158	HS_cons_H3K27Ac_FDR5_q10_CSpeaks_peak_54770;HS_cons_H3K27Ac_FDR5_q10_CSpeaks_peak_54771;HS_cons_H3K27Ac_FDR5_q10_CSpeaks_peak_54772;HS_cons_H3K27Ac_FDR5_q10_CSpeaks_peak_54773
6	85678123	85679123	1.47935	0	6	85677583	85680073	HS_cons_H3K27Ac_FDR5_q10_CSpeaks_peak_121648
17	82018174	82019174	1.47039	0	17	82011086	82044713	HS_cons_H3K27Ac_FDR5_q10_CSpeaks_peak_64556;HS_cons_H3K27Ac_FDR5_q10_CSpeaks_peak_64557;HS_cons_H3K27Ac_FDR5_q10_CSpeaks_peak_64558;HS_cons_H3K27Ac_FDR5_q10_CSpeaks_peak_64559;HS_cons_H3K27Ac_FDR5_q10_CSpeaks_peak_64560;HS_cons_H3K27Ac_FDR5_q10_CSpeaks_peak_64561;HS_cons_H3K27Ac_FDR5_q10_CSpeaks_peak_64562;HS_cons_H3K27Ac_FDR5_q10_CSpeaks_peak_64563;HS_cons_H3K27Ac_FDR5_q10_CSpeaks_peak_64564;HS_…
15	89827893	89828893	1.45549	0	15	89826727	89831472	HS_cons_H3K27Ac_FDR5_q10_CSpeaks_peak_47437;HS_cons_H3K27Ac_FDR5_q10_CSpeaks_peak_47438
16	31076679	31077679	1.44973	0	16	31075809	31092009	HS_cons_H3K27Ac_FDR5_q10_CSpeaks_peak_51293;HS_cons_H3K27Ac_FDR5_q10_CSpeaks_peak_51294;HS_cons_H3K27Ac_FDR5_q10_CSpeaks_peak_51295;HS_cons_H3K27Ac_FDR5_q10_CSpeaks_peak_51296;HS_cons_H3K27Ac_FDR5_q10_CSpeaks_peak_51297;HS_cons_H3K27Ac_FDR5_q10_CSpeaks_peak_51298;HS_cons_H3K27Ac_FDR5_q10_CSpeaks_peak_51299;HS_cons_H3K27Ac_FDR5_q10_CSpeaks_peak_51300;HS_cons_H3K27Ac_FDR5_q10_CSpeaks_peak_51301;HS_…
17	10697012	10698012	1.44618	2.16e-164	17	10695609	10698851	HS_cons_H3K27Ac_FDR5_q10_CSpeaks_peak_57369;HS_cons_H3K27Ac_FDR5_q10_CSpeaks_peak_57370
6	26364702	26365702	1.44411	1.37e-61	6	26364826	26366065	HS_cons_H3K27Ac_FDR5_q10_CSpeaks_peak_119198
17	58351730	58352730	1.43632	2.04e-156	17	58351112	58353790	HS_cons_H3K27Ac_FDR5_q10_CSpeaks_peak_61432
9	136409657	136410657	1.4336	0	9	136406630	136411987	HS_cons_H3K27Ac_FDR5_q10_CSpeaks_peak_144467;HS_cons_H3K27Ac_FDR5_q10_CSpeaks_peak_144468;HS_cons_H3K27Ac_FDR5_q10_CSpeaks_peak_144469
12	7096554	7097554	1.43046	0	12	7096246	7098775	HS_cons_H3K27Ac_FDR5_q10_CSpeaks_peak_30532;HS_cons_H3K27Ac_FDR5_q10_CSpeaks_peak_30533
2	74472045	74473045	1.41522	0	2	74471341	74475361	HS_cons_H3K27Ac_FDR5_q10_CSpeaks_peak_80104;HS_cons_H3K27Ac_FDR5_q10_CSpeaks_peak_80105
1	165630472	165631472	1.40506	2.58e-14	1	165629628	165632614	HS_cons_H3K27Ac_FDR5_q10_CSpeaks_peak_10231
22	20956451	20957451	1.4041	0	22	20955830	20958743	HS_cons_H3K27Ac_FDR5_q10_CSpeaks_peak_95311
17	7242217	7243217	1.39903	0	17	7241068	7244837	HS_cons_H3K27Ac_FDR5_q10_CSpeaks_peak_56968
15	84606269	84607269	1.39416	1.32e-37	15	84606934	84608982	HS_cons_H3K27Ac_FDR5_q10_CSpeaks_peak_47101;HS_cons_H3K27Ac_FDR5_q10_CSpeaks_peak_47102
11	2257134	2258134	1.39317	0	11	2256052	2273018	HS_cons_H3K27Ac_FDR5_q10_CSpeaks_peak_22138;HS_cons_H3K27Ac_FDR5_q10_CSpeaks_peak_22139;HS_cons_H3K27Ac_FDR5_q10_CSpeaks_peak_22140;HS_cons_H3K27Ac_FDR5_q10_CSpeaks_peak_22141;HS_cons_H3K27Ac_FDR5_q10_CSpeaks_peak_22142;HS_cons_H3K27Ac_FDR5_q10_CSpeaks_peak_22143;HS_cons_H3K27Ac_FDR5_q10_CSpeaks_peak_22144;HS_cons_H3K27Ac_FDR5_q10_CSpeaks_peak_22145;HS_cons_H3K27Ac_FDR5_q10_CSpeaks_peak_22146;HS_…
22	37023300	37024300	1.38384	0	22	37010094	37025829	HS_cons_H3K27Ac_FDR5_q10_CSpeaks_peak_97107;HS_cons_H3K27Ac_FDR5_q10_CSpeaks_peak_97108;HS_cons_H3K27Ac_FDR5_q10_CSpeaks_peak_97109;HS_cons_H3K27Ac_FDR5_q10_CSpeaks_peak_97110;HS_cons_H3K27Ac_FDR5_q10_CSpeaks_peak_97111;HS_cons_H3K27Ac_FDR5_q10_CSpeaks_peak_97112;HS_cons_H3K27Ac_FDR5_q10_CSpeaks_peak_97113;HS_cons_H3K27Ac_FDR5_q10_CSpeaks_peak_97114
11	22192360	22193360	1.37407	0	11	22191842	22194482	HS_cons_H3K27Ac_FDR5_q10_CSpeaks_peak_23371
8	33472332	33473332	1.37198	0	8	33470667	33474233	HS_cons_H3K27Ac_FDR5_q10_CSpeaks_peak_133833;HS_cons_H3K27Ac_FDR5_q10_CSpeaks_peak_133834
17	14207203	14208203	1.36151	0	17	14204785	14207851	HS_cons_H3K27Ac_FDR5_q10_CSpeaks_peak_57430
17	6751946	6752946	1.36128	0	17	6752305	6758896	HS_cons_H3K27Ac_FDR5_q10_CSpeaks_peak_56897;HS_cons_H3K27Ac_FDR5_q10_CSpeaks_peak_56898;HS_cons_H3K27Ac_FDR5_q10_CSpeaks_peak_56899;HS_cons_H3K27Ac_FDR5_q10_CSpeaks_peak_56900
16	2830227	2831227	1.35964	0	16	2826298	2833174	HS_cons_H3K27Ac_FDR5_q10_CSpeaks_peak_49306;HS_cons_H3K27Ac_FDR5_q10_CSpeaks_peak_49307;HS_cons_H3K27Ac_FDR5_q10_CSpeaks_peak_49308;HS_cons_H3K27Ac_FDR5_q10_CSpeaks_peak_49309;HS_cons_H3K27Ac_FDR5_q10_CSpeaks_peak_49310;HS_cons_H3K27Ac_FDR5_q10_CSpeaks_peak_49311
7	44606371	44607371	1.34918	1.05e-71	7	44605073	44609184	HS_cons_H3K27Ac_FDR5_q10_CSpeaks_peak_126895;HS_cons_H3K27Ac_FDR5_q10_CSpeaks_peak_126896
2	232926865	232927865	1.33283	5.51e-143	2	232927302	232929658	HS_cons_H3K27Ac_FDR5_q10_CSpeaks_peak_84923
8	144524249	144525249	1.32714	0	8	144513723	144525624	HS_cons_H3K27Ac_FDR5_q10_CSpeaks_peak_137837;HS_cons_H3K27Ac_FDR5_q10_CSpeaks_peak_137838;HS_cons_H3K27Ac_FDR5_q10_CSpeaks_peak_137839;HS_cons_H3K27Ac_FDR5_q10_CSpeaks_peak_137840;HS_cons_H3K27Ac_FDR5_q10_CSpeaks_peak_137841;HS_cons_H3K27Ac_FDR5_q10_CSpeaks_peak_137842
1	151993122	151994122	1.32133	1.55e-54	1	151991818	151995264	HS_cons_H3K27Ac_FDR5_q10_CSpeaks_peak_9274
11	1852510	1853510	1.31917	2.22e-62	11	1822216	1859838	HS_cons_H3K27Ac_FDR5_q10_CSpeaks_peak_22020;HS_cons_H3K27Ac_FDR5_q10_CSpeaks_peak_22021;HS_cons_H3K27Ac_FDR5_q10_CSpeaks_peak_22022;HS_cons_H3K27Ac_FDR5_q10_CSpeaks_peak_22023;HS_cons_H3K27Ac_FDR5_q10_CSpeaks_peak_22024;HS_cons_H3K27Ac_FDR5_q10_CSpeaks_peak_22025;HS_cons_H3K27Ac_FDR5_q10_CSpeaks_peak_22026;HS_cons_H3K27Ac_FDR5_q10_CSpeaks_peak_22027;HS_cons_H3K27Ac_FDR5_q10_CSpeaks_peak_22028;HS_…
6	44132904	44133904	1.31687	2.41e-15	6	44132869	44135345	HS_cons_H3K27Ac_FDR5_q10_CSpeaks_peak_121188;HS_cons_H3K27Ac_FDR5_q10_CSpeaks_peak_121189
20	1325122	1326122	1.31288	0	20	1324430	1331944	HS_cons_H3K27Ac_FDR5_q10_CSpeaks_peak_87063;HS_cons_H3K27Ac_FDR5_q10_CSpeaks_peak_87064;HS_cons_H3K27Ac_FDR5_q10_CSpeaks_peak_87065;HS_cons_H3K27Ac_FDR5_q10_CSpeaks_peak_87066;HS_cons_H3K27Ac_FDR5_q10_CSpeaks_peak_87067
7	30755152	30756152	1.30651	0	7	30754736	30756465	HS_cons_H3K27Ac_FDR5_q10_CSpeaks_peak_126347
20	45791737	45792737	1.29748	2.97e-205	20	45790758	45793439	HS_cons_H3K27Ac_FDR5_q10_CSpeaks_peak_89524
11	6926189	6927189	1.29007	0	11	6925759	6927641	HS_cons_H3K27Ac_FDR5_q10_CSpeaks_peak_22634
11	2911510	2912510	1.28409	0	11	2909252	2921228	HS_cons_H3K27Ac_FDR5_q10_CSpeaks_peak_22370;HS_cons_H3K27Ac_FDR5_q10_CSpeaks_peak_22371;HS_cons_H3K27Ac_FDR5_q10_CSpeaks_peak_22372;HS_cons_H3K27Ac_FDR5_q10_CSpeaks_peak_22373;HS_cons_H3K27Ac_FDR5_q10_CSpeaks_peak_22374;HS_cons_H3K27Ac_FDR5_q10_CSpeaks_peak_22375;HS_cons_H3K27Ac_FDR5_q10_CSpeaks_peak_22376
17	47849869	47850869	1.25958	0	17	47849439	47852011	HS_cons_H3K27Ac_FDR5_q10_CSpeaks_peak_60633;HS_cons_H3K27Ac_FDR5_q10_CSpeaks_peak_60634
12	53268616	53269616	1.2473	0	12	53267240	53270006	HS_cons_H3K27Ac_FDR5_q10_CSpeaks_peak_31965;HS_cons_H3K27Ac_FDR5_q10_CSpeaks_peak_31966
21	44996262	44997263	1.22677	9.41e-131	21	44974031	45005340	HS_cons_H3K27Ac_FDR5_q10_CSpeaks_peak_93998;HS_cons_H3K27Ac_FDR5_q10_CSpeaks_peak_93999;HS_cons_H3K27Ac_FDR5_q10_CSpeaks_peak_94000;HS_cons_H3K27Ac_FDR5_q10_CSpeaks_peak_94001;HS_cons_H3K27Ac_FDR5_q10_CSpeaks_peak_94002;HS_cons_H3K27Ac_FDR5_q10_CSpeaks_peak_94003;HS_cons_H3K27Ac_FDR5_q10_CSpeaks_peak_94004;HS_cons_H3K27Ac_FDR5_q10_CSpeaks_peak_94005;HS_cons_H3K27Ac_FDR5_q10_CSpeaks_peak_94006;HS_…
1	156249759	156250759	1.22557	0	1	156240743	156252167	HS_cons_H3K27Ac_FDR5_q10_CSpeaks_peak_9732;HS_cons_H3K27Ac_FDR5_q10_CSpeaks_peak_9733;HS_cons_H3K27Ac_FDR5_q10_CSpeaks_peak_9734;HS_cons_H3K27Ac_FDR5_q10_CSpeaks_peak_9735;HS_cons_H3K27Ac_FDR5_q10_CSpeaks_peak_9736;HS_cons_H3K27Ac_FDR5_q10_CSpeaks_peak_9737;HS_cons_H3K27Ac_FDR5_q10_CSpeaks_peak_9738;HS_cons_H3K27Ac_FDR5_q10_CSpeaks_peak_9739;HS_cons_H3K27Ac_FDR5_q10_CSpeaks_peak_9740;HS_cons_H3K2…
7	134316851	134317851	1.20424	0	7	134315625	134317874	HS_cons_H3K27Ac_FDR5_q10_CSpeaks_peak_130005
22	36261242	36262242	1.20065	1.82e-92	22	36261088	36263759	HS_cons_H3K27Ac_FDR5_q10_CSpeaks_peak_96957;HS_cons_H3K27Ac_FDR5_q10_CSpeaks_peak_96958;HS_cons_H3K27Ac_FDR5_q10_CSpeaks_peak_96959
6	116461562	116462562	1.19959	0	6	116461158	116463205	HS_cons_H3K27Ac_FDR5_q10_CSpeaks_peak_122108
5	55233480	55234480	1.1956	6.75e-36	5	55230856	55234828	HS_cons_H3K27Ac_FDR5_q10_CSpeaks_peak_114065;HS_cons_H3K27Ac_FDR5_q10_CSpeaks_peak_114066;HS_cons_H3K27Ac_FDR5_q10_CSpeaks_peak_114067
13	100533543	100534543	1.17857	5e-230	13	100531631	100535763	HS_cons_H3K27Ac_FDR5_q10_CSpeaks_peak_37512
17	50559711	50560711	1.17206	1.3e-183	17	50558058	50563626	HS_cons_H3K27Ac_FDR5_q10_CSpeaks_peak_61053;HS_cons_H3K27Ac_FDR5_q10_CSpeaks_peak_61054;HS_cons_H3K27Ac_FDR5_q10_CSpeaks_peak_61055;HS_cons_H3K27Ac_FDR5_q10_CSpeaks_peak_61056
8	22059692	22060692	1.16259	2.49e-187	8	22055758	22061399	HS_cons_H3K27Ac_FDR5_q10_CSpeaks_peak_133133;HS_cons_H3K27Ac_FDR5_q10_CSpeaks_peak_133134
14	104725555	104726555	1.08119	0	14	104721216	104737439	HS_cons_H3K27Ac_FDR5_q10_CSpeaks_peak_43131;HS_cons_H3K27Ac_FDR5_q10_CSpeaks_peak_43132;HS_cons_H3K27Ac_FDR5_q10_CSpeaks_peak_43133
12	132623114	132624114	1.07201	0	12	132617674	132626803	HS_cons_H3K27Ac_FDR5_q10_CSpeaks_peak_35747;HS_cons_H3K27Ac_FDR5_q10_CSpeaks_peak_35748;HS_cons_H3K27Ac_FDR5_q10_CSpeaks_peak_35749;HS_cons_H3K27Ac_FDR5_q10_CSpeaks_peak_35750;HS_cons_H3K27Ac_FDR5_q10_CSpeaks_peak_35751
1	109740173	109741173	1.06286	1.66e-256	1	109739142	109741383	HS_cons_H3K27Ac_FDR5_q10_CSpeaks_peak_8443
1	26200276	26201276	1.05561	0	1	26200569	26201998	HS_cons_H3K27Ac_FDR5_q10_CSpeaks_peak_4794
2	241081609	241082609	1.05426	3.34e-107	2	241080211	241083832	HS_cons_H3K27Ac_FDR5_q10_CSpeaks_peak_86628;HS_cons_H3K27Ac_FDR5_q10_CSpeaks_peak_86629
12	51922672	51923672	1.0431	7.5e-81	12	51920457	51925440	HS_cons_H3K27Ac_FDR5_q10_CSpeaks_peak_31696;HS_cons_H3K27Ac_FDR5_q10_CSpeaks_peak_31697
5	168530675	168531675	1.00635	1.05e-53	5	168528568	168530881	HS_cons_H3K4me1_FDR5_q10_CSpeaks_peak_80898;HS_cons_H3K4me1_FDR5_q10_CSpeaks_peak_80899
4	1682960	1683960	0.98669	0	4	1683092	1687519	HS_cons_H3K27Ac_FDR5_q10_CSpeaks_peak_108064;HS_cons_H3K27Ac_FDR5_q10_CSpeaks_peak_108065
19	49659393	49660393	0.98163	3.34e-43	19	49652184	49659925	HS_cons_H3K27Ac_FDR5_q10_CSpeaks_peak_75183;HS_cons_H3K27Ac_FDR5_q10_CSpeaks_peak_75184;HS_cons_H3K27Ac_FDR5_q10_CSpeaks_peak_75185;HS_cons_H3K27Ac_FDR5_q10_CSpeaks_peak_75186;HS_cons_H3K27Ac_FDR5_q10_CSpeaks_peak_75187;HS_cons_H3K27Ac_FDR5_q10_CSpeaks_peak_75188
17	78214110	78215110	0.939004	1.49e-25	17	78213653	78215325	HS_cons_H3K27Ac_FDR5_q10_CSpeaks_peak_63249
1	204260404	204261404	0.916291	2.28e-108	1	204256031	204260480	HS_cons_H3K27Ac_FDR5_q10_CSpeaks_peak_11371;HS_cons_H3K27Ac_FDR5_q10_CSpeaks_peak_11372
14	68938083	68939083	0.902375	1.98e-155	14	68932722	68953930	HS_cons_H3K27Ac_FDR5_q10_CSpeaks_peak_40122;HS_cons_H3K27Ac_FDR5_q10_CSpeaks_peak_40123;HS_cons_H3K27Ac_FDR5_q10_CSpeaks_peak_40124;HS_cons_H3K27Ac_FDR5_q10_CSpeaks_peak_40125;HS_cons_H3K27Ac_FDR5_q10_CSpeaks_peak_40126;HS_cons_H3K27Ac_FDR5_q10_CSpeaks_peak_40127;HS_cons_H3K27Ac_FDR5_q10_CSpeaks_peak_40128;HS_cons_H3K27Ac_FDR5_q10_CSpeaks_peak_40129;HS_cons_H3K27Ac_FDR5_q10_CSpeaks_peak_40130;HS_…
1	46341545	46342545	0.870161	4.33e-35	1	46339291	46343763	HS_cons_H3K27Ac_FDR5_q10_CSpeaks_peak_6918;HS_cons_H3K27Ac_FDR5_q10_CSpeaks_peak_6919
10	70671802	70672802	0.815174	2.16e-51	10	70672038	70673507	HS_cons_H3K27Ac_FDR5_q10_CSpeaks_peak_16401
3	42537008	42538008	0.810041	1.09e-45	3	42535508	42537054	HS_cons_H3K4me1_FDR5_q10_CSpeaks_peak_70741
2	85410575	85411575	0.792238	1.28e-09	2	85408648	85411485	HS_cons_H3K27Ac_FDR5_q10_CSpeaks_peak_80250;HS_cons_H3K27Ac_FDR5_q10_CSpeaks_peak_80251
19	5590479	5591479	0.786143	3.71e-34	19	5585085	5591609	HS_cons_H3K27Ac_FDR5_q10_CSpeaks_peak_69504;HS_cons_H3K27Ac_FDR5_q10_CSpeaks_peak_69505;HS_cons_H3K27Ac_FDR5_q10_CSpeaks_peak_69506;HS_cons_H3K27Ac_FDR5_q10_CSpeaks_peak_69507
2	97659691	97660691	0.684108	7.03e-106	2	97655797	97661920	HS_cons_H3K27Ac_FDR5_q10_CSpeaks_peak_80894;HS_cons_H3K27Ac_FDR5_q10_CSpeaks_peak_80895;HS_cons_H3K27Ac_FDR5_q10_CSpeaks_peak_80896;HS_cons_H3K27Ac_FDR5_q10_CSpeaks_peak_80897
1	7150473	7151473	0.650033	3.83e-99	1	7147966	7152205	HS_cons_H3K27Ac_FDR5_q10_CSpeaks_peak_1873;HS_cons_H3K27Ac_FDR5_q10_CSpeaks_peak_1874
7	156640454	156641454	0.618968	8.52e-145	7	156639069	156641930	HS_cons_H3K27Ac_FDR5_q10_CSpeaks_peak_131429
11	120184720	120185720	0.545438	1.71e-60	11	120182285	120189740	HS_cons_H3K27Ac_FDR5_q10_CSpeaks_peak_28712;HS_cons_H3K27Ac_FDR5_q10_CSpeaks_peak_28713;HS_cons_H3K27Ac_FDR5_q10_CSpeaks_peak_28714;HS_cons_H3K27Ac_FDR5_q10_CSpeaks_peak_28715;HS_cons_H3K27Ac_FDR5_q10_CSpeaks_peak_28716
5	38845563	38846563	0.521297	1.67e-08	5	38844293	38847619	HS_cons_H3K27Ac_FDR5_q10_CSpeaks_peak_113869
22	21695090	21696090	0.466746	2.4e-11	22	21692959	21699850	HS_cons_H3K27Ac_FDR5_q10_CSpeaks_peak_95396;HS_cons_H3K27Ac_FDR5_q10_CSpeaks_peak_95397;HS_cons_H3K27Ac_FDR5_q10_CSpeaks_peak_95398;HS_cons_H3K27Ac_FDR5_q10_CSpeaks_peak_95399;HS_cons_H3K27Ac_FDR5_q10_CSpeaks_peak_95400
1	109274466	109275466	0.421126	4.4e-12	1	109267193	109276676	HS_cons_H3K27Ac_FDR5_q10_CSpeaks_peak_8379;HS_cons_H3K27Ac_FDR5_q10_CSpeaks_peak_8380;HS_cons_H3K27Ac_FDR5_q10_CSpeaks_peak_8381;HS_cons_H3K27Ac_FDR5_q10_CSpeaks_peak_8382;HS_cons_H3K27Ac_FDR5_q10_CSpeaks_peak_8383
4	39697678	39698678	0.417586	4.03e-18	4	39695783	39699479	HS_cons_H3K27Ac_FDR5_q10_CSpeaks_peak_110228;HS_cons_H3K27Ac_FDR5_q10_CSpeaks_peak_110229
3	196503568	196504568	0.39123	3.29e-51	3	196500106	196504886	HS_cons_H3K27Ac_FDR5_q10_CSpeaks_peak_107442;HS_cons_H3K27Ac_FDR5_q10_CSpeaks_peak_107443
12	11170825	11171825	0.324496	0.127689	12	11170366	11172527	HS_cons_H3K27Ac_FDR5_q10_CSpeaks_peak_30664
14	105219928	105220928	0.305404	1.07e-36	14	105215727	105222572	HS_cons_H3K27Ac_FDR5_q10_CSpeaks_peak_43279;HS_cons_H3K27Ac_FDR5_q10_CSpeaks_peak_43280
16	1533924	1534924	0.287682	0.0714126	16	1525916	1557017	HS_cons_H3K27Ac_FDR5_q10_CSpeaks_peak_48918;HS_cons_H3K27Ac_FDR5_q10_CSpeaks_peak_48919;HS_cons_H3K27Ac_FDR5_q10_CSpeaks_peak_48920;HS_cons_H3K27Ac_FDR5_q10_CSpeaks_peak_48921;HS_cons_H3K27Ac_FDR5_q10_CSpeaks_peak_48922;HS_cons_H3K27Ac_FDR5_q10_CSpeaks_peak_48923;HS_cons_H3K27Ac_FDR5_q10_CSpeaks_peak_48924;HS_cons_H3K27Ac_FDR5_q10_CSpeaks_peak_48925;HS_cons_H3K27Ac_FDR5_q10_CSpeaks_peak_48926
21	37073014	37074014	0.157186	0.0712302	21	37071704	37075249	HS_cons_H3K27Ac_FDR5_q10_CSpeaks_peak_92780
19	35309242	35310242	0.115513	0.0198153	19	35309140	35314228	HS_cons_H3K27Ac_FDR5_q10_CSpeaks_peak_72928;HS_cons_H3K27Ac_FDR5_q10_CSpeaks_peak_72929;HS_cons_H3K27Ac_FDR5_q10_CSpeaks_peak_72930
17	39924003	39925003	-0.020776	0.355222	17	39919891	39929175	HS_cons_H3K27Ac_FDR5_q10_CSpeaks_peak_59514;HS_cons_H3K27Ac_FDR5_q10_CSpeaks_peak_59515;HS_cons_H3K27Ac_FDR5_q10_CSpeaks_peak_59516
1	23368138	23369138	-0.0963891	4.24e-16	1	23367098	23371959	HS_cons_H3K27Ac_FDR5_q10_CSpeaks_peak_4386;HS_cons_H3K27Ac_FDR5_q10_CSpeaks_peak_4387
18	21600504	21601504	-0.190835	1.93e-25	18	21599061	21602130	HS_cons_H3K27Ac_FDR5_q10_CSpeaks_peak_65745
17	47946986	47947986	-0.208545	0.130406	17	47945012	47947484	HS_cons_H3K27Ac_FDR5_q10_CSpeaks_peak_60652
11	8964202	8965202	-0.250726	6.34e-19	11	8962951	8966288	HS_cons_H3K27Ac_FDR5_q10_CSpeaks_peak_22790
14	59465142	59466142	-0.294876	0.001867	14	59463244	59466223	HS_cons_H3K27Ac_FDR5_q10_CSpeaks_peak_39717
8	33512512	33513512	-0.299704	5.44e-69	8	33511732	33515892	HS_cons_H3K27Ac_FDR5_q10_CSpeaks_peak_133836;HS_cons_H3K27Ac_FDR5_q10_CSpeaks_peak_133837
2	65055987	65056987	-0.321584	0.013361	2	65055154	65057680	HS_cons_H3K27Ac_FDR5_q10_CSpeaks_peak_79534
9	131288693	131289693	-0.398939	2.65e-63	9	131287462	131291554	HS_cons_H3K27Ac_FDR5_q10_CSpeaks_peak_142901;HS_cons_H3K27Ac_FDR5_q10_CSpeaks_peak_142902
19	13763531	13764531	-0.420613	1.3e-114	19	13761741	13766905	HS_cons_H3K27Ac_FDR5_q10_CSpeaks_peak_70863;HS_cons_H3K27Ac_FDR5_q10_CSpeaks_peak_70864
7	128936939	128937939	-0.457245	6.55e-230	7	128935939	128942956	HS_cons_H3K27Ac_FDR5_q10_CSpeaks_peak_129774;HS_cons_H3K27Ac_FDR5_q10_CSpeaks_peak_129775;HS_cons_H3K27Ac_FDR5_q10_CSpeaks_peak_129776;HS_cons_H3K27Ac_FDR5_q10_CSpeaks_peak_129777
15	99732963	99733963	-0.464306	0.0403636	15	99731012	99734810	HS_cons_H3K27Ac_FDR5_q10_CSpeaks_peak_47914;HS_cons_H3K27Ac_FDR5_q10_CSpeaks_peak_47915
1	25431702	25432702	-0.55273	1.17e-08	1	25429213	25432487	HS_cons_H3K27Ac_FDR5_q10_CSpeaks_peak_4645
17	76709397	76710397	-0.573674	0	17	76707535	76711926	HS_cons_H3K27Ac_FDR5_q10_CSpeaks_peak_62940;HS_cons_H3K27Ac_FDR5_q10_CSpeaks_peak_62941
1	235504222	235505222	-0.599462	4.44e-06	1	235502961	235506716	HS_cons_H3K27Ac_FDR5_q10_CSpeaks_peak_13135
11	65856764	65857764	-0.620979	4.11e-154	11	65854722	65874889	HS_cons_H3K27Ac_FDR5_q10_CSpeaks_peak_25464;HS_cons_H3K27Ac_FDR5_q10_CSpeaks_peak_25465;HS_cons_H3K27Ac_FDR5_q10_CSpeaks_peak_25466;HS_cons_H3K27Ac_FDR5_q10_CSpeaks_peak_25467;HS_cons_H3K27Ac_FDR5_q10_CSpeaks_peak_25468;HS_cons_H3K27Ac_FDR5_q10_CSpeaks_peak_25469;HS_cons_H3K27Ac_FDR5_q10_CSpeaks_peak_25470
5	140557477	140558477	-0.635517	0	5	140556277	140565915	HS_cons_H3K27Ac_FDR5_q10_CSpeaks_peak_115677;HS_cons_H3K27Ac_FDR5_q10_CSpeaks_peak_115678;HS_cons_H3K27Ac_FDR5_q10_CSpeaks_peak_115679;HS_cons_H3K27Ac_FDR5_q10_CSpeaks_peak_115680;HS_cons_H3K27Ac_FDR5_q10_CSpeaks_peak_115681
19	4267971	4268971	-0.643137	8.89e-09	19	4266907	4270361	HS_cons_H3K27Ac_FDR5_q10_CSpeaks_peak_69170;HS_cons_H3K27Ac_FDR5_q10_CSpeaks_peak_69171
6	138107311	138108311	-0.647114	3.6e-250	6	138106072	138108675	HS_cons_H3K27Ac_FDR5_q10_CSpeaks_peak_122372
16	3611112	3612112	-0.651904	5.65e-06	16	3610348	3613273	HS_cons_H3K27Ac_FDR5_q10_CSpeaks_peak_49496
21	44906935	44907935	-0.653926	0.000961439	21	44902420	44916145	HS_cons_H3K27Ac_FDR5_q10_CSpeaks_peak_93979;HS_cons_H3K27Ac_FDR5_q10_CSpeaks_peak_93980;HS_cons_H3K27Ac_FDR5_q10_CSpeaks_peak_93981;HS_cons_H3K27Ac_FDR5_q10_CSpeaks_peak_93982;HS_cons_H3K27Ac_FDR5_q10_CSpeaks_peak_93983
9	83707734	83708734	-0.671727	0	9	83706335	83709519	HS_cons_H3K27Ac_FDR5_q10_CSpeaks_peak_139224
17	7107331	7108331	-0.707962	6.01e-09	17	7106280	7110906	HS_cons_H3K27Ac_FDR5_q10_CSpeaks_peak_56924;HS_cons_H3K27Ac_FDR5_q10_CSpeaks_peak_56925;HS_cons_H3K27Ac_FDR5_q10_CSpeaks_peak_56926;HS_cons_H3K27Ac_FDR5_q10_CSpeaks_peak_56927
14	50311947	50312947	-0.77455	0	14	50311084	50313444	HS_cons_H3K27Ac_FDR5_q10_CSpeaks_peak_39521
15	43329673	43330673	-0.775553	9.62e-248	15	43328922	43331443	HS_cons_H3K27Ac_FDR5_q10_CSpeaks_peak_44680
3	39107749	39108749	-0.863046	0.000957696	3	39105811	39108820	HS_cons_H3K27Ac_FDR5_q10_CSpeaks_peak_102194
10	133166183	133167183	-0.869688	0	10	133156462	133170331	HS_cons_H3K27Ac_FDR5_q10_CSpeaks_peak_21241;HS_cons_H3K27Ac_FDR5_q10_CSpeaks_peak_21242;HS_cons_H3K27Ac_FDR5_q10_CSpeaks_peak_21243;HS_cons_H3K27Ac_FDR5_q10_CSpeaks_peak_21244;HS_cons_H3K27Ac_FDR5_q10_CSpeaks_peak_21245;HS_cons_H3K27Ac_FDR5_q10_CSpeaks_peak_21246
7	134645807	134646807	-0.932914	0	7	134646212	134647753	HS_cons_H3K27Ac_FDR5_q10_CSpeaks_peak_130014
17	60079139	60080139	-0.96809	8.77e-11	17	60077873	60079994	HS_cons_H3K27Ac_FDR5_q10_CSpeaks_peak_61527
1	235650444	235651444	-0.970134	5.27e-07	1	235649924	235651249	HS_cons_H3K27Ac_FDR5_q10_CSpeaks_peak_13141
10	100996071	100997071	-0.972054	4.41e-263	10	100995568	101004721	HS_cons_H3K27Ac_FDR5_q10_CSpeaks_peak_18318;HS_cons_H3K27Ac_FDR5_q10_CSpeaks_peak_18319
4	112636710	112637710	-1.03988	0	4	112636197	112638846	HS_cons_H3K27Ac_FDR5_q10_CSpeaks_peak_111126
1	9264529	9265529	-1.07315	0	1	9260266	9267963	HS_cons_H3K27Ac_FDR5_q10_CSpeaks_peak_2209;HS_cons_H3K27Ac_FDR5_q10_CSpeaks_peak_2210;HS_cons_H3K27Ac_FDR5_q10_CSpeaks_peak_2211;HS_cons_H3K27Ac_FDR5_q10_CSpeaks_peak_2212
8	11853326	11854326	-1.11925	0	8	11851593	11855927	HS_cons_H3K27Ac_FDR5_q10_CSpeaks_peak_132868;HS_cons_H3K27Ac_FDR5_q10_CSpeaks_peak_132869
21	36060045	36061045	-1.17404	0	21	36058684	36061669	HS_cons_H3K27Ac_FDR5_q10_CSpeaks_peak_92677
14	74292990	74293990	-1.19684	0	14	74291651	74293050	HS_cons_H3K27Ac_FDR5_q10_CSpeaks_peak_40448
14	22829552	22830552	-1.22475	4.46e-39	14	22828888	22831016	HS_cons_H3K27Ac_FDR5_q10_CSpeaks_peak_38939
8	144106725	144107725	-1.31209	0	8	144102251	144115739	HS_cons_H3K27Ac_FDR5_q10_CSpeaks_peak_137698;HS_cons_H3K27Ac_FDR5_q10_CSpeaks_peak_137699;HS_cons_H3K27Ac_FDR5_q10_CSpeaks_peak_137700;HS_cons_H3K27Ac_FDR5_q10_CSpeaks_peak_137701;HS_cons_H3K27Ac_FDR5_q10_CSpeaks_peak_137702;HS_cons_H3K27Ac_FDR5_q10_CSpeaks_peak_137703;HS_cons_H3K27Ac_FDR5_q10_CSpeaks_peak_137704;HS_cons_H3K27Ac_FDR5_q10_CSpeaks_peak_137705;HS_cons_H3K27Ac_FDR5_q10_CSpeaks_peak_1…
14	74302769	74303769	-1.32843	0	14	74301800	74304115	HS_cons_H3K27Ac_FDR5_q10_CSpeaks_peak_40451
10	100998475	100999475	-1.3827	0	10	100995568	101004721	HS_cons_H3K27Ac_FDR5_q10_CSpeaks_peak_18318;HS_cons_H3K27Ac_FDR5_q10_CSpeaks_peak_18319
16	48234977	48235977	-1.38566	0	16	48235643	48236882	HS_cons_H3K27Ac_FDR5_q10_CSpeaks_peak_51540
6	82247554	82248554	-1.38785	0	6	82245843	82249835	HS_cons_H3K27Ac_FDR5_q10_CSpeaks_peak_121607
2	200888936	200889936	-1.40839	0	2	200887232	200890329	HS_cons_H3K27Ac_FDR5_q10_CSpeaks_peak_83736
20	45341616	45342616	-1.41908	6.42e-06	20	45340963	45349282	HS_cons_H3K27Ac_FDR5_q10_CSpeaks_peak_89499;HS_cons_H3K27Ac_FDR5_q10_CSpeaks_peak_89500;HS_cons_H3K27Ac_FDR5_q10_CSpeaks_peak_89501;HS_cons_H3K27Ac_FDR5_q10_CSpeaks_peak_89502
1	155989873	155990873	-1.44591	0	1	155988568	155992867	HS_cons_H3K27Ac_FDR5_q10_CSpeaks_peak_9678;HS_cons_H3K27Ac_FDR5_q10_CSpeaks_peak_9679;HS_cons_H3K27Ac_FDR5_q10_CSpeaks_peak_9680
6	33746705	33747705	-1.56879	0	6	33743925	33752997	HS_cons_H3K27Ac_FDR5_q10_CSpeaks_peak_119914;HS_cons_H3K27Ac_FDR5_q10_CSpeaks_peak_119915;HS_cons_H3K27Ac_FDR5_q10_CSpeaks_peak_119916;HS_cons_H3K27Ac_FDR5_q10_CSpeaks_peak_119917
3	48464045	48465045	-1.68055	0	3	48463218	48471418	HS_cons_H3K27Ac_FDR5_q10_CSpeaks_peak_102820;HS_cons_H3K27Ac_FDR5_q10_CSpeaks_peak_102821
1	3900047	3901047	-1.70587	0	1	3898817	3909738	HS_cons_H3K27Ac_FDR5_q10_CSpeaks_peak_1305;HS_cons_H3K27Ac_FDR5_q10_CSpeaks_peak_1306;HS_cons_H3K27Ac_FDR5_q10_CSpeaks_peak_1307;HS_cons_H3K27Ac_FDR5_q10_CSpeaks_peak_1308;HS_cons_H3K27Ac_FDR5_q10_CSpeaks_peak_1309
4	8373967	8374967	-1.71515	0	4	8374490	8376134	HS_cons_H3K4me1_FDR5_q10_CSpeaks_peak_75902
21	46155367	46156367	-1.74904	0	21	46148982	46160768	HS_cons_H3K27Ac_FDR5_q10_CSpeaks_peak_94366;HS_cons_H3K27Ac_FDR5_q10_CSpeaks_peak_94367;HS_cons_H3K27Ac_FDR5_q10_CSpeaks_peak_94368;HS_cons_H3K27Ac_FDR5_q10_CSpeaks_peak_94369
8	143212192	143213192	-1.81521	0	8	143205511	143216363	HS_cons_H3K27Ac_FDR5_q10_CSpeaks_peak_137369;HS_cons_H3K27Ac_FDR5_q10_CSpeaks_peak_137370;HS_cons_H3K27Ac_FDR5_q10_CSpeaks_peak_137371;HS_cons_H3K27Ac_FDR5_q10_CSpeaks_peak_137372;HS_cons_H3K27Ac_FDR5_q10_CSpeaks_peak_137373
7	150322215	150323215	-1.82933	0	7	150322102	150326046	HS_cons_H3K27Ac_FDR5_q10_CSpeaks_peak_130557
19	44941237	44942237	-1.8618	0	19	44937573	44950420	HS_cons_H3K27Ac_FDR5_q10_CSpeaks_peak_74196;HS_cons_H3K27Ac_FDR5_q10_CSpeaks_peak_74197;HS_cons_H3K27Ac_FDR5_q10_CSpeaks_peak_74198;HS_cons_H3K27Ac_FDR5_q10_CSpeaks_peak_74199;HS_cons_H3K27Ac_FDR5_q10_CSpeaks_peak_74200;HS_cons_H3K27Ac_FDR5_q10_CSpeaks_peak_74201;HS_cons_H3K27Ac_FDR5_q10_CSpeaks_peak_74202
8	97258975	97259975	-1.96944	2.08e-49	8	97258635	97260180	HS_cons_H3K27Ac_FDR5_q10_CSpeaks_peak_135299
2	178193480	178194480	-2.04302	0	2	178193124	178196116	HS_cons_H3K27Ac_FDR5_q10_CSpeaks_peak_83490
1	54855067	54856067	-2.13804	3.88e-25	1	54850710	54855908	HS_cons_H3K27Ac_FDR5_q10_CSpeaks_peak_7550;HS_cons_H3K27Ac_FDR5_q10_CSpeaks_peak_7551;HS_cons_H3K27Ac_FDR5_q10_CSpeaks_peak_7552;HS_cons_H3K27Ac_FDR5_q10_CSpeaks_peak_7553
21	34521727	34522727	-2.26622	9.96e-28	21	34518028	34526066	HS_cons_H3K27Ac_FDR5_q10_CSpeaks_peak_92630;HS_cons_H3K27Ac_FDR5_q10_CSpeaks_peak_92631;HS_cons_H3K27Ac_FDR5_q10_CSpeaks_peak_92632;HS_cons_H3K27Ac_FDR5_q10_CSpeaks_peak_92633;HS_cons_H3K27Ac_FDR5_q10_CSpeaks_peak_92634;HS_cons_H3K27Ac_FDR5_q10_CSpeaks_peak_92635
9	136476881	136477881	-2.28639	0	9	136469644	136478520	HS_cons_H3K27Ac_FDR5_q10_CSpeaks_peak_144498;HS_cons_H3K27Ac_FDR5_q10_CSpeaks_peak_144499;HS_cons_H3K27Ac_FDR5_q10_CSpeaks_peak_144500;HS_cons_H3K27Ac_FDR5_q10_CSpeaks_peak_144501;HS_cons_H3K27Ac_FDR5_q10_CSpeaks_peak_144502;HS_cons_H3K27Ac_FDR5_q10_CSpeaks_peak_144503;HS_cons_H3K27Ac_FDR5_q10_CSpeaks_peak_144504
4	8502401	8503401	-2.31501	2.63e-17	4	8502627	8511584	HS_cons_H3K27Ac_FDR5_q10_CSpeaks_peak_109677;HS_cons_H3K27Ac_FDR5_q10_CSpeaks_peak_109678;HS_cons_H3K27Ac_FDR5_q10_CSpeaks_peak_109679;HS_cons_H3K27Ac_FDR5_q10_CSpeaks_peak_109680;HS_cons_H3K27Ac_FDR5_q10_CSpeaks_peak_109681;HS_cons_H3K27Ac_FDR5_q10_CSpeaks_peak_109682
21	46285336	46286336	-2.4795	0	21	46285056	46287393	HS_cons_H3K27Ac_FDR5_q10_CSpeaks_peak_94406
11	47244760	47245760	-2.5509	0	11	47244111	47246525	HS_cons_H3K27Ac_FDR5_q10_CSpeaks_peak_24095
3	39050997	39051997	-2.65604	0	3	39051003	39053286	HS_cons_H3K27Ac_FDR5_q10_CSpeaks_peak_102189
5	55232694	55233694	-2.73003	3.18e-10	5	55230856	55234828	HS_cons_H3K27Ac_FDR5_q10_CSpeaks_peak_114065;HS_cons_H3K27Ac_FDR5_q10_CSpeaks_peak_114066;HS_cons_H3K27Ac_FDR5_q10_CSpeaks_peak_114067
22	21000885	21001885	-2.75862	0	22	20988187	21003936	HS_cons_H3K27Ac_FDR5_q10_CSpeaks_peak_95327;HS_cons_H3K27Ac_FDR5_q10_CSpeaks_peak_95328;HS_cons_H3K27Ac_FDR5_q10_CSpeaks_peak_95329;HS_cons_H3K27Ac_FDR5_q10_CSpeaks_peak_95330;HS_cons_H3K27Ac_FDR5_q10_CSpeaks_peak_95331;HS_cons_H3K27Ac_FDR5_q10_CSpeaks_peak_95332;HS_cons_H3K27Ac_FDR5_q10_CSpeaks_peak_95333;HS_cons_H3K27Ac_FDR5_q10_CSpeaks_peak_95334
3	139677094	139678094	-2.79321	1.06e-10	3	139676790	139678519	HS_cons_H3K27Ac_FDR5_q10_CSpeaks_peak_106074
17	81330229	81331229	-2.86693	0	17	81321007	81352051	HS_cons_H3K27Ac_FDR5_q10_CSpeaks_peak_64329;HS_cons_H3K27Ac_FDR5_q10_CSpeaks_peak_64330;HS_cons_H3K27Ac_FDR5_q10_CSpeaks_peak_64331;HS_cons_H3K27Ac_FDR5_q10_CSpeaks_peak_64332;HS_cons_H3K27Ac_FDR5_q10_CSpeaks_peak_64333;HS_cons_H3K27Ac_FDR5_q10_CSpeaks_peak_64334;HS_cons_H3K27Ac_FDR5_q10_CSpeaks_peak_64335;HS_cons_H3K27Ac_FDR5_q10_CSpeaks_peak_64336;HS_cons_H3K27Ac_FDR5_q10_CSpeaks_peak_64337;HS_…
19	54172959	54173960	-2.96734	0	19	54171202	54175188	HS_cons_H3K27Ac_FDR5_q10_CSpeaks_peak_75740;HS_cons_H3K27Ac_FDR5_q10_CSpeaks_peak_75741;HS_cons_H3K27Ac_FDR5_q10_CSpeaks_peak_75742
1	178542224	178543224	-3.11352	2.41e-09	1	178541115	178544728	HS_cons_H3K27Ac_FDR5_q10_CSpeaks_peak_10516
17	76687918	76688918	-3.11352	2.41e-09	17	76681172	76690154	HS_cons_H3K27Ac_FDR5_q10_CSpeaks_peak_62929;HS_cons_H3K27Ac_FDR5_q10_CSpeaks_peak_62930;HS_cons_H3K27Ac_FDR5_q10_CSpeaks_peak_62931;HS_cons_H3K27Ac_FDR5_q10_CSpeaks_peak_62932;HS_cons_H3K27Ac_FDR5_q10_CSpeaks_peak_62933;HS_cons_H3K27Ac_FDR5_q10_CSpeaks_peak_62934
16	88854330	88855330	-3.21888	5.84e-10	16	88852680	88859147	HS_cons_H3K27Ac_FDR5_q10_CSpeaks_peak_55206;HS_cons_H3K27Ac_FDR5_q10_CSpeaks_peak_55207;HS_cons_H3K27Ac_FDR5_q10_CSpeaks_peak_55208;HS_cons_H3K27Ac_FDR5_q10_CSpeaks_peak_55209
19	33793663	33794663	-3.23475	6.94e-23	19	33792378	33793792	HS_cons_H3K27Ac_FDR5_q10_CSpeaks_peak_72732
3	119702641	119703641	-3.23868	1.13e-18	3	119702274	119704111	HS_cons_H3K27Ac_FDR5_q10_CSpeaks_peak_104544
18	10525517	10526517	-3.3673	7.33e-11	18	10525275	10527810	HS_cons_H3K27Ac_FDR5_q10_CSpeaks_peak_65360
19	45640937	45641937	-3.44999	3.01e-21	19	45640836	45644432	HS_cons_H3K27Ac_FDR5_q10_CSpeaks_peak_74391
1	179881296	179882296	-3.67301	0	1	179880249	179884119	HS_cons_H3K27Ac_FDR5_q10_CSpeaks_peak_10570;HS_cons_H3K27Ac_FDR5_q10_CSpeaks_peak_10571
10	100986704	100987704	-6.81242	4.63e-304	10	100986113	100988440	HS_cons_H3K27Ac_FDR5_q10_CSpeaks_peak_18317
1	169794489	169795489	-6.90826	2.45e-43	1	169793906	169795956	HS_cons_H3K27Ac_FDR5_q10_CSpeaks_peak_10376
2	241770985	241771985	-7.23598	2.12e-47	2	241767580	241778927	HS_cons_H3K27Ac_FDR5_q10_CSpeaks_peak_86810;HS_cons_H3K27Ac_FDR5_q10_CSpeaks_peak_86811;HS_cons_H3K27Ac_FDR5_q10_CSpeaks_peak_86812;HS_cons_H3K27Ac_FDR5_q10_CSpeaks_peak_86813;HS_cons_H3K27Ac_FDR5_q10_CSpeaks_peak_86814
2	27663423	27664423	-7.65823	6.63e-53	2	27662295	27665448	HS_cons_H3K27Ac_FDR5_q10_CSpeaks_peak_78369
11	46700399	46701399	-8.1934	2.56e-60	11	46698845	46702313	HS_cons_H3K27Ac_FDR5_q10_CSpeaks_peak_24046

## Sheet: 69_TE_subfamilies
# Results and summary statistics of luciferase reporter assay experiments on 69 TE subfamilies
Name	p-value
AluYc	0.0021645
Arthur1C	0.0021645
Charlie1	0.0021645
Charlie15a	0.0021645
Charlie16a	0.0021645
Charlie19a	0.0021645
Charlie1a	0.0021645
Charlie1b	0.0021645
Charlie2a	0.0021645
Charlie2b	0.0021645
Charlie4a	0.0021645
Charlie4z	0.0021645
Charlie8	0.0021645
FordPrefect	0.0021645
L1MB3	0.0021645
L1MC	0.0021645
L1MC5	0.0021645
L1MDb	0.0021645
L1PA2	0.0021645
L2	0.0021645
L2a	0.0021645
L2b	0.0021645
L2c	0.0021645
L3	0.0021645
L3b	0.0021645
LTR41B	0.0021645
LTR53	0.0021645
LTR65	0.0021645
MamGyp.int	0.0021645
MamGypLTR3	0.0021645
MamRep1879	0.0021645
MamRep4096	0.0021645
MamRep488	0.0021645
MER102a	0.0021645
MER102b	0.0021645
MER112	0.0021645
MER113	0.0021645
MER115	0.0021645
MER121	0.0021645
MER20	0.0021645
MER21B	0.0649351
MER33	0.0021645
MER45A	0.0021645
MER53	0.0021645
MER58B	0.0021645
MER5A	0.0649351
MER5A1	0.004329
MER5B	0.0021645
MER5C	0.0021645
MER68	0.0021645
MER89	0.0021645
MER90	0.0021645
MER90a	0.0021645
MER92A	0.0021645
MER96	0.0021645
MER96B	0.0021645
MIR	0.0021645
MIR3	0.0021645
MIRb	0.0021645
MIRc	0.0021645
ORSL	0.0021645
ORSL.2b	0.0021645
Plat_L3	0.0021645
SVA_F	0.0021645
Tigger12c	0.0021645
Tigger15a	0.0021645
X7A_LINE	0.0021645
X7C_LINE	0.00865801
Zaphod	0.132035

## Sheet: GRIN3A
# Results and summary statistics of luciferase reporter assay experiments on the enhancer of GRIN3A
REPLICATE	GRIN3A	NEGATIVE_CTRL
T1	826	0.521
T1	2588	5.708
T1	1198	1.24
T2	1198	1.204
T2	78.53	0.5757
T2	113.9	0.0671
T3	2531.45	32.6275
T3	1687.94	48.4687
T3	1277.5	87.9397
T4	398.5	43.185
T4	203.3	26.9
T4	24.9381	35.31

## Sheet: JARID2
# Results and summary statistics of luciferase reporter assay experiments on the enhancer of JARID2
REPLICATE	NEGATIVE_CTRL	JARID2
T1	32.6275	1.052
T1	48.4687	24.2412
T1	87.9397	7.91259
T2	43.185	20.983
T2	26.9	6.032
T2	35.31	6.63
T3	3.052	2.616
T3	12.39	6.128
T3	34.07	1.443
