# Supplementary material for: Transposable elements are the primary source of novelty in primate gene regulation
Source: Genome Res. 2017 Oct;27(10):1623–33. doi: 10.1101/gr.218149.116 (PMC5630026; doi:10.1101/gr.218149.116)
Supplement: Supplemental Material [file supp_gr.218149.116_Supplemental_TABLE_S7.xlsx]

## Sheet: Sheet1
#Summary statistics of analyses performed at different False Discovery Rates
FDR (%)	FRACTION_REC_EVOLVED CREs	FRAC_CONSERVED CREs	N_HUMAN_SPECIFIC CREs	N_APE_SPECIFIC CREs	conservation~gene_type (logistic regression p-value)	conservation~N_cell_types (logistic regression p-value)	conservation~TFBSs (logistic regression p-value)
10	0.368748	0.631252	57	2259	<2E-16	6.2e-15	<2E-16
20	0.466155	0.533845	67	3902	<2E-16	<2E-16	<2E-16
50	0.678368	0.321632	84	7861	<2E-16	<2E-16	<2E-16
