# Supplementary material for: Transposable elements are the primary source of novelty in primate gene regulation
Source: Genome Res. 2017 Oct;27(10):1623–33. doi: 10.1101/gr.218149.116 (PMC5630026; doi:10.1101/gr.218149.116)
Supplement: Supplemental Material [file supp_gr.218149.116_Supplemental_Table_S8.xlsx]

## Sheet: BB
# Summary statistics of sex-bias verification analyses
BB_1413m_Tuff	MALE
BB_8012	MALE
	H3K27ac
	BB_8012
BB_1413m_Tuff	0.99
	H3K4me1
	BB_8012
BB_1413m_Tuff	0.99

## Sheet: CH
CH_4X0430	FEMALE
CH_40191	FEMALE
	H3K27ac
	CH_40191
CH_4X0430	0.9
	H3K4me1
	CH_40191
CH_4X0430	0.83

## Sheet: HS
HS_B2	FEMALE
HS_B16	FEMALE
HS_B48	MALE
	H3K27ac
	HS_B16
HS_B2	0.93
	H3K4me1
	HS_B48
HS_B2	0.6

## Sheet: ML
ML_7022f_Basil	FEMALE
ML_ALFA_ALFA	MALE
	H3K27ac
	ML_ALFA_ALFA
ML_7022f_Basil	0.77
	H3K4me1
	ML_ALFA_ALFA
ML_7022f_Basil	0.76

## Sheet: MS
MS_17086	MALE
MS_32842	FEMALE
MS_31480	FEMALE
	H3K27ac
	MS_32842
MS_17086	0.85
	H3K4me1
	MS_31480
MS_17086	0.63

## Sheet: RH
RH_27415	FEMALE
RH_27425	MALE
	H3K27ac
	RH_27425
RH_27415	0.9
	H3K4me1
	RH_27425
RH_27415	0.71
