# Supplementary material for: Transposable elements are the primary source of novelty in primate gene regulation
Source: Genome Res. 2017 Oct;27(10):1623–33. doi: 10.1101/gr.218149.116 (PMC5630026; doi:10.1101/gr.218149.116)
Supplement: Supplemental Material [file supp_gr.218149.116_Supplemental_Table_S9.xlsx]

## Sheet: chimp
# Summary statistics of nucleotide sequence conservation analyses (one sheet per species)
CRE	subs_per_total	conservation_status
HS_H3K27ac_10000	0.00612508	0
HS_H3K27ac_10002	0.0145548	0
HS_H3K27ac_10004	0.0773237	0
HS_H3K27ac_10009	0.0111152	0
HS_H3K27ac_10010	0.00806452	0
HS_H3K27ac_10011	0.0229523	0
HS_H3K27ac_10012	0.016696	0
HS_H3K27ac_10013	0.0126697	0
HS_H3K27ac_10014	0.010585	0
HS_H3K27ac_10017	0.00612692	0
HS_H3K27ac_10018	0.0298443	0
HS_H3K27ac_10019	0.0110327	0
HS_H3K27ac_10021	0.0087604	0
HS_H3K27ac_10022	0.00463883	0
HS_H3K27ac_10023	0.0028436	1
HS_H3K27ac_100232	0.0108865	0
HS_H3K27ac_100233	0.0242529	0
HS_H3K27ac_100241	0.0176222	0
HS_H3K27ac_100247	0.0213021	0
HS_H3K27ac_100252	0.020436	0
HS_H3K27ac_10026	0.00956106	0
HS_H3K27ac_10027	0.00770791	0
HS_H3K27ac_100271	0.0187416	0
HS_H3K27ac_10028	0.0142096	0
HS_H3K27ac_10029	0.0111732	0
HS_H3K27ac_10030	0.00642055	0
HS_H3K27ac_10032	0.0105358	0
HS_H3K27ac_10034	0.00847714	0
HS_H3K27ac_100370	0.0717931	0
HS_H3K27ac_100374	0.0120792	0
HS_H3K27ac_100377	0.010998	0
HS_H3K27ac_100397	0.0113766	0
HS_H3K27ac_100400	0.0109649	0
HS_H3K27ac_10046	0.00840336	0
HS_H3K27ac_100461	0.017038	0
HS_H3K27ac_100462	0.0145173	0
HS_H3K27ac_100465	0.0172352	0
HS_H3K27ac_100466	0.0233892	0
HS_H3K27ac_100467	0.0139653	0
HS_H3K27ac_10053	0.0105502	0
HS_H3K27ac_100549	0.0111717	0
HS_H3K27ac_100558	0.00995552	0
HS_H3K27ac_10056	0.00736377	0
HS_H3K27ac_100561	0.0102199	0
HS_H3K27ac_100563	0.0238935	0
HS_H3K27ac_100565	0.0160839	0
HS_H3K27ac_100568	0.123487	0
HS_H3K27ac_100570	0.0116981	0
HS_H3K27ac_10058	0.00957996	0
HS_H3K27ac_10060	0.00744269	0
HS_H3K27ac_10061	0.00596783	0
HS_H3K27ac_10063	0.0118193	0
HS_H3K27ac_10064	0.0559263	0
HS_H3K27ac_10065	0.043708	0
HS_H3K27ac_10067	0.00732742	0
HS_H3K27ac_100676	0.0507473	0
HS_H3K27ac_100677	0.0232058	0
HS_H3K27ac_100678	0.0567924	0
HS_H3K27ac_10068	0.00914077	0
HS_H3K27ac_100680	0.0246085	0
HS_H3K27ac_100682	0.0162308	0
HS_H3K27ac_10069	0.00469956	0
HS_H3K27ac_100690	0.0227875	0
HS_H3K27ac_100691	0.0282436	0
HS_H3K27ac_100693	0.0162324	0
HS_H3K27ac_100694	0.0126626	0
HS_H3K27ac_100695	0.0466061	0
HS_H3K27ac_100698	0.0381992	0
HS_H3K27ac_10070	0.00974098	0
HS_H3K27ac_100704	0.0172414	0
HS_H3K27ac_100706	0.0200695	0
HS_H3K27ac_100707	0.0195188	0
HS_H3K27ac_100708	0.0175229	0
HS_H3K27ac_100709	0.0143702	0
HS_H3K27ac_100710	0.0108485	0
HS_H3K27ac_100711	0.0099839	0
HS_H3K27ac_100713	0.0103409	0
HS_H3K27ac_100715	0.0138203	0
HS_H3K27ac_100718	0.0216802	0
HS_H3K27ac_100719	0.0141468	0
HS_H3K27ac_10072	0.00464723	0
HS_H3K27ac_100720	0.0162047	0
HS_H3K27ac_100721	0.020904	0
HS_H3K27ac_100724	0.0111492	0
HS_H3K27ac_100727	0.0129922	0
HS_H3K27ac_100728	0.00901886	0
HS_H3K27ac_100729	0.016333	0
HS_H3K27ac_10073	0.0107836	0
HS_H3K27ac_10074	0.00807175	0
HS_H3K27ac_100741	0.0122699	0
HS_H3K27ac_100744	0.0187668	0
HS_H3K27ac_100745	0.0119403	0
HS_H3K27ac_10075	0.004772	0
HS_H3K27ac_100750	0.0366064	0
HS_H3K27ac_10076	0.00247832	0
HS_H3K27ac_100761	0.0173362	0
HS_H3K27ac_100778	0.0133829	0
HS_H3K27ac_100780	0.00754085	0
HS_H3K27ac_100781	0.0412371	0
HS_H3K27ac_100782	0.0134831	0
HS_H3K27ac_100783	0.0134486	0
HS_H3K27ac_10079	0.00442282	0
HS_H3K27ac_1008	0.0153846	0
HS_H3K27ac_10080	0.00675845	0
HS_H3K27ac_100803	0.00873563	0
HS_H3K27ac_100804	0.0104317	0
HS_H3K27ac_10081	0.00561798	0
HS_H3K27ac_100812	0.0111524	0
HS_H3K27ac_100813	0.0105079	0
HS_H3K27ac_10082	0.00639616	0
HS_H3K27ac_100820	0.00932401	0
HS_H3K27ac_100821	0.0115412	0
HS_H3K27ac_100822	0.00593472	0
HS_H3K27ac_100823	0.00431881	0
HS_H3K27ac_100824	0.00679185	0
HS_H3K27ac_100825	0.00615926	0
HS_H3K27ac_100826	0.0054409	0
HS_H3K27ac_100828	0.00606878	0
HS_H3K27ac_100829	0.00644468	0
HS_H3K27ac_100831	0.0448645	0
HS_H3K27ac_100835	0.00587084	0
HS_H3K27ac_100836	0.0136632	0
HS_H3K27ac_100837	0.00961941	0
HS_H3K27ac_100838	0.0094552	0
HS_H3K27ac_100839	0.0139333	0
HS_H3K27ac_100842	0.138016	0
HS_H3K27ac_10085	0.00851852	0
HS_H3K27ac_10086	0.00701219	0
HS_H3K27ac_100862	0.00952835	0
HS_H3K27ac_100863	0.0109266	0
HS_H3K27ac_100864	0.0120694	0
HS_H3K27ac_100868	0.0162822	0
HS_H3K27ac_100869	0.00892061	0
HS_H3K27ac_10087	0.00554667	0
HS_H3K27ac_100870	0.0141405	0
HS_H3K27ac_100871	0.0131431	0
HS_H3K27ac_100873	0.0316964	0
HS_H3K27ac_100874	0.0059657	0
HS_H3K27ac_100875	0.00618047	0
HS_H3K27ac_100876	0.00773301	0
HS_H3K27ac_100896	0.0165361	0
HS_H3K27ac_10090	0.0121896	0
HS_H3K27ac_100904	0.0178206	0
HS_H3K27ac_10091	0.0114527	0
HS_H3K27ac_100914	0.031976	0
HS_H3K27ac_100916	0.0157137	0
HS_H3K27ac_100917	0.0100087	0
HS_H3K27ac_10092	0.0074162	0
HS_H3K27ac_100926	0.115296	0
HS_H3K27ac_100927	0.00551769	0
HS_H3K27ac_100929	0.0124892	0
HS_H3K27ac_100930	0.0126683	0
HS_H3K27ac_100935	0.0172786	0
HS_H3K27ac_100937	0.0757037	0
HS_H3K27ac_100938	0.00944546	0
HS_H3K27ac_10094	0.009256	0
HS_H3K27ac_100940	0.0102195	0
HS_H3K27ac_100941	0.00972569	0
HS_H3K27ac_100944	0.0120695	0
HS_H3K27ac_100946	0.015436	0
HS_H3K27ac_100947	0.0161218	0
HS_H3K27ac_100948	0.014552	0
HS_H3K27ac_100951	0.0185185	0
HS_H3K27ac_100952	0.0161725	0
HS_H3K27ac_100953	0.0168889	0
HS_H3K27ac_100954	0.0106838	0
HS_H3K27ac_100955	0.0135074	0
HS_H3K27ac_100956	0.00755985	0
HS_H3K27ac_100957	0.00974388	0
HS_H3K27ac_100958	0.0135135	0
HS_H3K27ac_100960	0.0113733	0
HS_H3K27ac_100962	0.00745157	0
HS_H3K27ac_100963	0.0192308	0
HS_H3K27ac_100964	0.0158137	0
HS_H3K27ac_100968	0.020992	0
HS_H3K27ac_100970	0.0107551	0
HS_H3K27ac_100972	0.0341524	0
HS_H3K27ac_100981	0.0148434	0
HS_H3K27ac_100985	0.0155642	0
HS_H3K27ac_100986	0.0132979	0
HS_H3K27ac_100987	0.0125436	0
HS_H3K27ac_100989	0.0194049	0
HS_H3K27ac_100990	0.0104758	0
HS_H3K27ac_100992	0.0137615	0
HS_H3K27ac_100994	0.0179431	0
HS_H3K27ac_100996	0.0156316	0
HS_H3K27ac_100998	0.0423761	0
HS_H3K27ac_10100	0.00945946	0
HS_H3K27ac_101007	0.0138702	0
HS_H3K27ac_101008	0.011326	0
HS_H3K27ac_10101	0.027911	0
HS_H3K27ac_101010	0.0187713	0
HS_H3K27ac_101011	0.110402	0
HS_H3K27ac_101013	0.0176313	0
HS_H3K27ac_10102	0.0097561	0
HS_H3K27ac_101021	0.00961539	0
HS_H3K27ac_101022	0.0132583	0
HS_H3K27ac_101023	0.0985499	0
HS_H3K27ac_101024	0.00887311	0
HS_H3K27ac_101025	0.00971694	0
HS_H3K27ac_101026	0.0104063	0
HS_H3K27ac_101029	0.0138408	0
HS_H3K27ac_10103	0.01828	0
HS_H3K27ac_101033	0.015006	0
HS_H3K27ac_101035	0.00979021	0
HS_H3K27ac_101037	0.00657143	0
HS_H3K27ac_101039	0.0118044	0
HS_H3K27ac_10104	0.01184	0
HS_H3K27ac_101040	0.0183201	0
HS_H3K27ac_101041	0.0853211	0
HS_H3K27ac_10106	0.0615385	0
HS_H3K27ac_101060	0.0118126	0
HS_H3K27ac_10107	0.0140781	0
HS_H3K27ac_10108	0.0053286	0
HS_H3K27ac_101085	0.0153039	0
HS_H3K27ac_101086	0.0179315	0
HS_H3K27ac_101088	0.0102996	0
HS_H3K27ac_101089	0.0125483	0
HS_H3K27ac_101091	0.0124334	0
HS_H3K27ac_101092	0.0149311	0
HS_H3K27ac_101093	0.0109218	0
HS_H3K27ac_101094	0.0139522	0
HS_H3K27ac_101096	0.0219178	1
HS_H3K27ac_101097	0.0121896	0
HS_H3K27ac_101098	0.00711854	0
HS_H3K27ac_101111	0.00982704	0
HS_H3K27ac_101112	0.0111709	0
HS_H3K27ac_101113	0.0115508	0
HS_H3K27ac_101114	0.0104121	0
HS_H3K27ac_101115	0.131602	0
HS_H3K27ac_101116	0.00806452	0
HS_H3K27ac_101117	0.00810081	0
HS_H3K27ac_101118	0.00893898	0
HS_H3K27ac_101119	0.0111919	0
HS_H3K27ac_101122	0.00935399	0
HS_H3K27ac_101182	0.01338	0
HS_H3K27ac_101235	0.0598434	0
HS_H3K27ac_101237	0.0090212	0
HS_H3K27ac_101240	0.0110405	0
HS_H3K27ac_101244	0.00810612	0
HS_H3K27ac_101247	0.00969305	0
HS_H3K27ac_101249	0.0122888	0
HS_H3K27ac_101252	0.0149774	0
HS_H3K27ac_101260	0.0115916	0
HS_H3K27ac_101261	0.0101857	0
HS_H3K27ac_101263	0.0180298	0
HS_H3K27ac_101267	0.00887665	0
HS_H3K27ac_101270	0.0726303	0
HS_H3K27ac_101272	0.0204499	0
HS_H3K27ac_101273	0.0144928	0
HS_H3K27ac_101274	0.0129599	0
HS_H3K27ac_101275	0.0109751	0
HS_H3K27ac_101279	0.0164666	0
HS_H3K27ac_101281	0.00828618	0
HS_H3K27ac_101285	0.0094552	0
HS_H3K27ac_10130	0.0283538	0
HS_H3K27ac_101339	0.0227521	0
HS_H3K27ac_10134	0.0344317	0
HS_H3K27ac_101341	0.0141509	0
HS_H3K27ac_101342	0.0916317	0
HS_H3K27ac_101347	0.0101045	0
HS_H3K27ac_101348	0.0157549	0
HS_H3K27ac_101349	0.00832673	0
HS_H3K27ac_10135	0.0389785	0
HS_H3K27ac_101350	0.0143105	0
HS_H3K27ac_101351	0.0587905	0
HS_H3K27ac_101357	0.00946186	0
HS_H3K27ac_101359	0.00966902	0
HS_H3K27ac_101360	0.0117799	0
HS_H3K27ac_101365	0.0150641	0
HS_H3K27ac_101367	0.0140044	0
HS_H3K27ac_101368	0.0169114	0
HS_H3K27ac_101369	0.0146825	0
HS_H3K27ac_101370	0.0125571	0
HS_H3K27ac_101374	0.015805	0
HS_H3K27ac_101376	0.14616	0
HS_H3K27ac_101377	0.0131847	0
HS_H3K27ac_10138	0.00999025	0
HS_H3K27ac_101382	0.0548667	0
HS_H3K27ac_101385	0.0116801	0
HS_H3K27ac_10139	0.00869565	0
HS_H3K27ac_10140	0.00811688	0
HS_H3K27ac_10142	0.0147867	0
HS_H3K27ac_101422	0.00821596	0
HS_H3K27ac_101423	0.0144928	0
HS_H3K27ac_101427	0.0146628	0
HS_H3K27ac_101432	0.0158934	0
HS_H3K27ac_101434	0.0110569	0
HS_H3K27ac_101436	0.00880705	0
HS_H3K27ac_101439	0.143587	0
HS_H3K27ac_101442	0.016119	0
HS_H3K27ac_101465	0.0153453	0
HS_H3K27ac_101466	0.0106732	0
HS_H3K27ac_101467	0.0156838	0
HS_H3K27ac_10147	0.0213395	0
HS_H3K27ac_101474	0.011402	0
HS_H3K27ac_101475	0.0260258	0
HS_H3K27ac_10149	0.0122926	0
HS_H3K27ac_101493	0.0195931	0
HS_H3K27ac_101496	0.0179691	0
HS_H3K27ac_101497	0.0160901	0
HS_H3K27ac_101499	0.0120482	0
HS_H3K27ac_101500	0.0201975	0
HS_H3K27ac_10151	0.00785683	0
HS_H3K27ac_101519	0.0097269	0
HS_H3K27ac_10152	0.00880339	0
HS_H3K27ac_10153	0.00972364	0
HS_H3K27ac_10156	0.00925181	0
HS_H3K27ac_10157	0.0175277	0
HS_H3K27ac_10158	0.00839631	0
HS_H3K27ac_1016	0.0175335	0
HS_H3K27ac_101616	0.0148117	0
HS_H3K27ac_101617	0.011504	0
HS_H3K27ac_101618	0.0147754	0
HS_H3K27ac_10163	0.0507614	0
HS_H3K27ac_10164	0.0085547	0
HS_H3K27ac_10165	0.00932903	0
HS_H3K27ac_10167	0.0152027	0
HS_H3K27ac_10168	0.0149701	0
HS_H3K27ac_10169	0.0147022	0
HS_H3K27ac_10171	0.0120698	0
HS_H3K27ac_101713	0.0916031	0
HS_H3K27ac_101715	0.0081843	0
HS_H3K27ac_101725	0.00519931	0
HS_H3K27ac_101726	0.0138934	0
HS_H3K27ac_101727	0.0121704	0
HS_H3K27ac_101729	0.0154964	0
HS_H3K27ac_101730	0.0154044	0
HS_H3K27ac_101731	0.0139712	0
HS_H3K27ac_101732	0.0142799	0
HS_H3K27ac_101733	0.0145553	0
HS_H3K27ac_101735	0.0917987	0
HS_H3K27ac_101736	0.0376569	0
HS_H3K27ac_101737	0.0140845	0
HS_H3K27ac_10174	0.0110691	0
HS_H3K27ac_101742	0.00822562	0
HS_H3K27ac_101743	0.012285	0
HS_H3K27ac_101744	0.012095	0
HS_H3K27ac_101745	0.0135563	0
HS_H3K27ac_101746	0.0085547	0
HS_H3K27ac_101747	0.0183185	0
HS_H3K27ac_101748	0.00848176	0
HS_H3K27ac_101749	0.0100134	0
HS_H3K27ac_101750	0.0113489	0
HS_H3K27ac_101753	0.0144993	0
HS_H3K27ac_101757	0	0
HS_H3K27ac_101758	0.0105541	0
HS_H3K27ac_101759	0.0164975	0
HS_H3K27ac_101760	0.0717489	0
HS_H3K27ac_101761	0.0281179	0
HS_H3K27ac_101762	0.0164911	0
HS_H3K27ac_101763	0.0137443	0
HS_H3K27ac_101764	0.0104895	0
HS_H3K27ac_101768	0.0163139	0
HS_H3K27ac_101769	0.0116071	0
HS_H3K27ac_10177	0.0136577	0
HS_H3K27ac_101770	0.015391	0
HS_H3K27ac_101782	0.00732601	0
HS_H3K27ac_101783	0.00636132	0
HS_H3K27ac_101785	0.0134921	0
HS_H3K27ac_101787	0.0156318	0
HS_H3K27ac_101792	0.00911162	0
HS_H3K27ac_101793	0.136497	0
HS_H3K27ac_101794	0.00895904	0
HS_H3K27ac_101795	0	0
HS_H3K27ac_101796	0.0243337	0
HS_H3K27ac_101797	0.0140845	0
HS_H3K27ac_101798	0.00885296	0
HS_H3K27ac_101799	0.00994475	0
HS_H3K27ac_101800	0.00786627	1
HS_H3K27ac_101804	0.0148699	0
HS_H3K27ac_101805	0.0171429	0
HS_H3K27ac_101806	0.0127781	0
HS_H3K27ac_101810	0.00633446	0
HS_H3K27ac_101811	0.00974421	0
HS_H3K27ac_101817	0.00970874	0
HS_H3K27ac_101818	0.0129618	0
HS_H3K27ac_101819	0.0188172	0
HS_H3K27ac_101822	0.00444642	0
HS_H3K27ac_101823	0.0478207	0
HS_H3K27ac_101824	0.0144483	0
HS_H3K27ac_101835	0.0827268	0
HS_H3K27ac_101836	0.0118074	0
HS_H3K27ac_101837	0.0139514	0
HS_H3K27ac_101838	0.00899129	0
HS_H3K27ac_101848	0.0104212	0
HS_H3K27ac_101849	0.0129817	0
HS_H3K27ac_101850	0.0181232	0
HS_H3K27ac_101854	0.00897593	0
HS_H3K27ac_101856	0.0110522	0
HS_H3K27ac_101858	0.0130719	0
HS_H3K27ac_101859	0.00664011	0
HS_H3K27ac_101864	0.0178368	0
HS_H3K27ac_101866	0.0136112	0
HS_H3K27ac_101867	0.0111763	0
HS_H3K27ac_101872	0.00561313	0
HS_H3K27ac_101873	0.0189983	0
HS_H3K27ac_101875	0.0180795	0
HS_H3K27ac_101876	0.0159347	0
HS_H3K27ac_101877	0.013109	0
HS_H3K27ac_101878	0.00870575	0
HS_H3K27ac_101880	0.00923077	0
HS_H3K27ac_101881	0.0192912	0
HS_H3K27ac_101882	0.00790995	0
HS_H3K27ac_101883	0.0125704	0
HS_H3K27ac_101884	0.0128092	0
HS_H3K27ac_101888	0.0103939	0
HS_H3K27ac_101889	0.0107914	0
HS_H3K27ac_101890	0.0119893	0
HS_H3K27ac_101891	0.00974314	0
HS_H3K27ac_101892	0.0177966	0
HS_H3K27ac_101893	0.0125082	0
HS_H3K27ac_101897	0.0172414	0
HS_H3K27ac_101901	0.00601504	0
HS_H3K27ac_101909	0.00739477	0
HS_H3K27ac_10191	0.00852585	0
HS_H3K27ac_101911	0.014977	0
HS_H3K27ac_101913	0.0116822	0
HS_H3K27ac_101914	0.0123288	0
HS_H3K27ac_101915	0.00619743	0
HS_H3K27ac_101916	0.00815328	0
HS_H3K27ac_101919	0.0132802	0
HS_H3K27ac_101922	0.00691244	0
HS_H3K27ac_101923	0.0121622	0
HS_H3K27ac_101924	0.0190875	0
HS_H3K27ac_101926	0.0150309	0
HS_H3K27ac_101929	0.0130689	0
HS_H3K27ac_101932	0.0130807	0
HS_H3K27ac_101933	0.0100701	0
HS_H3K27ac_101934	0.0132685	0
HS_H3K27ac_101935	0.0247093	0
HS_H3K27ac_101936	0.0188195	0
HS_H3K27ac_101937	0.00668502	0
HS_H3K27ac_101939	0.0193452	0
HS_H3K27ac_10194	0.0124666	0
HS_H3K27ac_101940	0.0189951	0
HS_H3K27ac_101945	0.0138229	0
HS_H3K27ac_101947	0.0237921	0
HS_H3K27ac_101948	0.0183856	0
HS_H3K27ac_101949	0.0132743	0
HS_H3K27ac_10196	0.0153584	0
HS_H3K27ac_101962	0.0110236	0
HS_H3K27ac_101963	0.00823938	0
HS_H3K27ac_10197	0.0181818	0
HS_H3K27ac_101976	0.00835149	0
HS_H3K27ac_101977	0.0087043	0
HS_H3K27ac_10198	0.00745941	0
HS_H3K27ac_10199	0.0426254	0
HS_H3K27ac_102000	0.0157343	0
HS_H3K27ac_102001	0.00841121	0
HS_H3K27ac_102004	0.00561572	0
HS_H3K27ac_10201	0.0108303	0
HS_H3K27ac_102012	0.0143979	0
HS_H3K27ac_102013	0.0104971	0
HS_H3K27ac_102014	0.00836636	0
HS_H3K27ac_102015	0.0134469	0
HS_H3K27ac_102016	0.021814	0
HS_H3K27ac_102019	0.0057971	0
HS_H3K27ac_102027	0.00661026	0
HS_H3K27ac_102028	0.00808511	0
HS_H3K27ac_102035	0.0147944	0
HS_H3K27ac_102038	0.0207301	0
HS_H3K27ac_102039	0.00868432	0
HS_H3K27ac_102041	0.00795053	0
HS_H3K27ac_102042	0.00889831	0
HS_H3K27ac_102043	0.0145175	0
HS_H3K27ac_102044	0.0103371	0
HS_H3K27ac_102045	0.0146615	0
HS_H3K27ac_102046	0.00970018	0
HS_H3K27ac_102047	0.00558899	0
HS_H3K27ac_102048	0.00733795	0
HS_H3K27ac_102049	0.0135635	0
HS_H3K27ac_10206	0.0760534	0
HS_H3K27ac_102063	0.011262	0
HS_H3K27ac_10207	0.0106932	0
HS_H3K27ac_102071	0.00847458	0
HS_H3K27ac_102072	0.00911854	0
HS_H3K27ac_102073	0.0137655	0
HS_H3K27ac_102074	0.0126984	0
HS_H3K27ac_102075	0.0142603	0
HS_H3K27ac_102076	0.00654165	0
HS_H3K27ac_102077	0.0107871	0
HS_H3K27ac_102078	0.00779558	0
HS_H3K27ac_10208	0.0104954	0
HS_H3K27ac_102080	0.0169753	0
HS_H3K27ac_102081	0.00992794	0
HS_H3K27ac_102082	0.00915141	0
HS_H3K27ac_102083	0.00808625	0
HS_H3K27ac_102084	0.0098401	0
HS_H3K27ac_102085	0.0071478	0
HS_H3K27ac_102087	0.00642792	0
HS_H3K27ac_102089	0.0153846	0
HS_H3K27ac_10209	0.0165987	0
HS_H3K27ac_102099	0.00654206	0
HS_H3K27ac_102104	0.0093741	0
HS_H3K27ac_102108	0.00952381	0
HS_H3K27ac_10211	0.0129199	0
HS_H3K27ac_102115	0.00883246	0
HS_H3K27ac_102118	0.0069808	0
HS_H3K27ac_102119	0.0241102	0
HS_H3K27ac_10212	0.00658183	0
HS_H3K27ac_102122	0.0186916	0
HS_H3K27ac_102123	0.0176991	0
HS_H3K27ac_102126	0.0110009	0
HS_H3K27ac_102127	0.00996583	0
HS_H3K27ac_102128	0.0112286	0
HS_H3K27ac_10213	0.0121131	0
HS_H3K27ac_102132	0.00732357	0
HS_H3K27ac_102133	0.00851711	0
HS_H3K27ac_102135	0.0129812	0
HS_H3K27ac_102136	0.00957425	0
HS_H3K27ac_10214	0.0130252	0
HS_H3K27ac_102142	0.0181518	0
HS_H3K27ac_102143	0.0157523	0
HS_H3K27ac_102144	0.00776461	0
HS_H3K27ac_102145	0.0146354	0
HS_H3K27ac_10215	0.0157021	0
HS_H3K27ac_102159	0.00981229	0
HS_H3K27ac_10216	0.00659868	0
HS_H3K27ac_102160	0.00822707	0
HS_H3K27ac_102161	0.0609343	0
HS_H3K27ac_102164	0.0132171	0
HS_H3K27ac_102166	0.0984313	0
HS_H3K27ac_102168	0.147778	0
HS_H3K27ac_102169	0.00844347	0
HS_H3K27ac_10217	0.00980829	0
HS_H3K27ac_102170	0.0122111	0
HS_H3K27ac_102171	0.0124888	0
HS_H3K27ac_102172	0.0138935	0
HS_H3K27ac_102174	0.00625559	0
HS_H3K27ac_102175	0.0143167	0
HS_H3K27ac_102176	0.00914411	0
HS_H3K27ac_102177	0.00718778	0
HS_H3K27ac_10218	0.00790167	0
HS_H3K27ac_102187	0.00991438	0
HS_H3K27ac_102189	0.0141988	0
HS_H3K27ac_10219	0.0126468	0
HS_H3K27ac_102190	0.00620155	0
HS_H3K27ac_102191	0.003432	0
HS_H3K27ac_102192	0.00845309	0
HS_H3K27ac_102194	0.00703164	0
HS_H3K27ac_102195	0.00650618	0
HS_H3K27ac_102197	0.0104977	0
HS_H3K27ac_10220	0.0133179	0
HS_H3K27ac_102200	0.00704338	0
HS_H3K27ac_102205	0.0067937	0
HS_H3K27ac_102208	0.00853018	0
HS_H3K27ac_102209	0.00675821	0
HS_H3K27ac_102214	0.0085547	0
HS_H3K27ac_102215	0.0165289	0
HS_H3K27ac_102217	0.00930713	0
HS_H3K27ac_102227	0.00777001	0
HS_H3K27ac_102228	0.0187094	0
HS_H3K27ac_102229	0.0140337	0
HS_H3K27ac_102230	0.0741139	0
HS_H3K27ac_102231	0.0252958	0
HS_H3K27ac_102235	0.011593	0
HS_H3K27ac_10224	0.01191	0
HS_H3K27ac_10225	0.0118681	0
HS_H3K27ac_102252	0.0469974	0
HS_H3K27ac_10226	0.00775194	0
HS_H3K27ac_10227	0.00980392	0
HS_H3K27ac_102276	0.0146995	0
HS_H3K27ac_10228	0.00252207	0
HS_H3K27ac_102287	0.0158443	0
HS_H3K27ac_102288	0.00628366	0
HS_H3K27ac_102289	0.0100546	0
HS_H3K27ac_10229	0.0775941	0
HS_H3K27ac_102291	0.0121654	0
HS_H3K27ac_102292	0.0155404	0
HS_H3K27ac_102293	0.0130397	0
HS_H3K27ac_102295	0.00904159	0
HS_H3K27ac_102299	0.0144129	0
HS_H3K27ac_10230	0.0158457	0
HS_H3K27ac_102300	0.0998326	0
HS_H3K27ac_102305	0.00758252	0
HS_H3K27ac_102306	0.00893407	0
HS_H3K27ac_102307	0.0113742	0
HS_H3K27ac_102309	0.0106148	0
HS_H3K27ac_10231	0.0142748	0
HS_H3K27ac_102310	0.0108591	0
HS_H3K27ac_102311	0.0456274	0
HS_H3K27ac_102312	0.0155705	0
HS_H3K27ac_10232	0.0123318	0
HS_H3K27ac_102340	0.0153374	0
HS_H3K27ac_102341	0.00903733	0
HS_H3K27ac_102342	0.00623617	0
HS_H3K27ac_102364	0.00843882	0
HS_H3K27ac_102365	0.0211044	0
HS_H3K27ac_102382	0.00502152	0
HS_H3K27ac_102384	0.0141213	0
HS_H3K27ac_102385	0.0133333	0
HS_H3K27ac_102386	0.00570704	0
HS_H3K27ac_102387	0.0119674	0
HS_H3K27ac_102391	0.0099438	0
HS_H3K27ac_102392	0.00782269	0
HS_H3K27ac_102393	0.012059	0
HS_H3K27ac_102398	0.00584393	0
HS_H3K27ac_102408	0.0100137	0
HS_H3K27ac_102417	0.0070609	0
HS_H3K27ac_102418	0.00884956	0
HS_H3K27ac_102420	0.00780488	0
HS_H3K27ac_102422	0.00752879	0
HS_H3K27ac_102427	0.0111838	0
HS_H3K27ac_102431	0.0115188	0
HS_H3K27ac_102432	0.00913838	0
HS_H3K27ac_102435	0.00875706	0
HS_H3K27ac_102436	0.0058296	0
HS_H3K27ac_102437	0.0410065	0
HS_H3K27ac_102462	0.0108446	0
HS_H3K27ac_102468	0.010879	0
HS_H3K27ac_102469	0.0106329	0
HS_H3K27ac_102470	0.0154525	0
HS_H3K27ac_102471	0.0104849	0
HS_H3K27ac_102473	0.00929512	0
HS_H3K27ac_102478	0.0114198	0
HS_H3K27ac_10248	0.0186389	0
HS_H3K27ac_102488	0.0150773	0
HS_H3K27ac_102489	0.00399113	0
HS_H3K27ac_10249	0.0101322	0
HS_H3K27ac_102490	0.0175518	0
HS_H3K27ac_102491	0.0135135	0
HS_H3K27ac_102492	0.00923594	0
HS_H3K27ac_102493	0.0102949	0
HS_H3K27ac_102495	0.00877193	0
HS_H3K27ac_102497	0.00492611	0
HS_H3K27ac_102499	0.00558179	0
HS_H3K27ac_102500	0.00770261	0
HS_H3K27ac_102501	0.0201765	0
HS_H3K27ac_102502	0.0108923	0
HS_H3K27ac_102503	0.00885936	0
HS_H3K27ac_102506	0.00985301	0
HS_H3K27ac_102508	0.00977076	0
HS_H3K27ac_102509	0.0113422	0
HS_H3K27ac_102511	0.0108893	0
HS_H3K27ac_102514	0.00963439	0
HS_H3K27ac_102516	0.00834202	0
HS_H3K27ac_102518	0.0130279	0
HS_H3K27ac_102519	0.00934579	0
HS_H3K27ac_102521	0.0084108	0
HS_H3K27ac_102522	0.0072493	0
HS_H3K27ac_102523	0.0118818	0
HS_H3K27ac_102525	0.00645482	0
HS_H3K27ac_102527	0.00907519	0
HS_H3K27ac_102528	0.00958188	0
HS_H3K27ac_102529	0.0124349	0
HS_H3K27ac_102531	0.00848142	0
HS_H3K27ac_102532	0.0140406	0
HS_H3K27ac_102544	0.00696258	0
HS_H3K27ac_102545	0.0105983	0
HS_H3K27ac_102546	0.00986193	0
HS_H3K27ac_102550	0.0201072	0
HS_H3K27ac_102551	0.00900495	0
HS_H3K27ac_102552	0.00826173	0
HS_H3K27ac_102553	0.00907912	0
HS_H3K27ac_102554	0.00995954	0
HS_H3K27ac_102556	0.00690577	0
HS_H3K27ac_102557	0.0120862	0
HS_H3K27ac_102558	0.00874936	0
HS_H3K27ac_102560	0.00729076	0
HS_H3K27ac_102562	0.00830936	0
HS_H3K27ac_102564	0.00952079	0
HS_H3K27ac_10257	0.011045	0
HS_H3K27ac_102572	0.00909485	0
HS_H3K27ac_102575	0.00763035	0
HS_H3K27ac_102577	0.0178667	0
HS_H3K27ac_10258	0.00791035	0
HS_H3K27ac_102580	0.017484	0
HS_H3K27ac_102581	0.0094552	0
HS_H3K27ac_102582	0.00699301	0
HS_H3K27ac_102583	0.0132576	0
HS_H3K27ac_102585	0.00952142	0
HS_H3K27ac_102588	0.00641848	1
HS_H3K27ac_102589	0.00864553	0
HS_H3K27ac_10259	0.00828984	0
HS_H3K27ac_102593	0.0114778	0
HS_H3K27ac_102597	0.0969683	0
HS_H3K27ac_1026	0.0212533	0
HS_H3K27ac_102600	0.0154565	0
HS_H3K27ac_102602	0.0192719	0
HS_H3K27ac_102603	0.00198413	0
HS_H3K27ac_102604	0.00888291	0
HS_H3K27ac_10261	0.00664305	0
HS_H3K27ac_102612	0.0108696	0
HS_H3K27ac_102615	0.00820026	0
HS_H3K27ac_102616	0.0598237	0
HS_H3K27ac_10262	0.0186788	0
HS_H3K27ac_102623	0.0147462	0
HS_H3K27ac_102629	0.0130066	0
HS_H3K27ac_10263	0.00816151	0
HS_H3K27ac_102632	0.0220109	0
HS_H3K27ac_102634	0.00726185	0
HS_H3K27ac_102635	0.00920377	0
HS_H3K27ac_102638	0.00793651	0
HS_H3K27ac_102639	0.00818613	0
HS_H3K27ac_10264	0.0121483	0
HS_H3K27ac_102640	0.0137931	0
HS_H3K27ac_102647	0.0340349	0
HS_H3K27ac_10266	0.0160344	0
HS_H3K27ac_102662	0.106224	0
HS_H3K27ac_10267	0.0109382	0
HS_H3K27ac_10268	0.00774194	0
HS_H3K27ac_10269	0.0171057	0
HS_H3K27ac_102691	0.00845572	0
HS_H3K27ac_102692	0.0767243	0
HS_H3K27ac_102696	0.0156122	0
HS_H3K27ac_10270	0.016115	0
HS_H3K27ac_102701	0.00700576	0
HS_H3K27ac_102706	0.00671432	0
HS_H3K27ac_10271	0.0182537	0
HS_H3K27ac_102714	0.007181	0
HS_H3K27ac_102717	0.00819672	0
HS_H3K27ac_102718	0.00827472	0
HS_H3K27ac_102728	0.00526316	0
HS_H3K27ac_102730	0.00856434	0
HS_H3K27ac_102731	0.0330866	0
HS_H3K27ac_102732	0.0256267	0
HS_H3K27ac_10274	0.0103359	0
HS_H3K27ac_102746	0.00948081	0
HS_H3K27ac_102747	0.116561	0
HS_H3K27ac_102758	0.0177839	0
HS_H3K27ac_102760	0.0118621	0
HS_H3K27ac_102762	0.00462963	0
HS_H3K27ac_102763	0.00809353	0
HS_H3K27ac_102764	0.0270496	0
HS_H3K27ac_102766	0.0237264	0
HS_H3K27ac_102770	0.0133531	0
HS_H3K27ac_102772	0.0108145	0
HS_H3K27ac_102775	0.015083	0
HS_H3K27ac_102785	0.00793868	0
HS_H3K27ac_10280	0.0126354	0
HS_H3K27ac_102802	0.0075001	0
HS_H3K27ac_10281	0.0167973	0
HS_H3K27ac_102817	0.0084482	0
HS_H3K27ac_102818	0.0110497	0
HS_H3K27ac_102819	0.00969619	0
HS_H3K27ac_10282	0.00539568	0
HS_H3K27ac_10283	0.00310009	0
HS_H3K27ac_102836	0.00821018	0
HS_H3K27ac_102837	0.00609491	0
HS_H3K27ac_102838	0.00745033	0
HS_H3K27ac_102839	0.00969305	0
HS_H3K27ac_10284	0.0100925	0
HS_H3K27ac_102840	0.0085796	0
HS_H3K27ac_102842	0.0110254	0
HS_H3K27ac_102843	0.0874704	0
HS_H3K27ac_102854	0.00985222	0
HS_H3K27ac_102860	0.00765832	0
HS_H3K27ac_102862	0.0131303	0
HS_H3K27ac_10287	0.00916497	0
HS_H3K27ac_102872	0.00931543	0
HS_H3K27ac_102875	0.0747352	0
HS_H3K27ac_102882	0.0102874	0
HS_H3K27ac_102883	0.0187984	0
HS_H3K27ac_102884	0.00637472	0
HS_H3K27ac_102886	0.0110415	0
HS_H3K27ac_10289	0.0130011	0
HS_H3K27ac_102905	0.0132646	0
HS_H3K27ac_10291	0.0160312	0
HS_H3K27ac_102910	0.034965	0
HS_H3K27ac_102911	0.023569	0
HS_H3K27ac_102913	0.0111801	0
HS_H3K27ac_102914	0.0129412	0
HS_H3K27ac_102917	0.00817439	0
HS_H3K27ac_102919	0.0067446	0
HS_H3K27ac_10292	0.0145764	0
HS_H3K27ac_102920	0.00483384	0
HS_H3K27ac_102925	0.00977121	0
HS_H3K27ac_102926	0.00834128	0
HS_H3K27ac_102929	0.00881057	0
HS_H3K27ac_10293	0.00713967	0
HS_H3K27ac_102930	0.0304188	0
HS_H3K27ac_102934	0.12524	0
HS_H3K27ac_102939	0.00388224	0
HS_H3K27ac_10294	0.0131734	0
HS_H3K27ac_102940	0.00928297	0
HS_H3K27ac_102944	0.00448029	0
HS_H3K27ac_102945	0.00710119	0
HS_H3K27ac_102947	0.00512821	0
HS_H3K27ac_102949	0.00623701	0
HS_H3K27ac_102951	0.0079033	0
HS_H3K27ac_102954	0.00706291	0
HS_H3K27ac_102958	0.0513398	0
HS_H3K27ac_102963	0.00845528	0
HS_H3K27ac_102965	0.00948926	0
HS_H3K27ac_102966	0.00832735	0
HS_H3K27ac_102969	0.018018	0
HS_H3K27ac_102971	0.012069	0
HS_H3K27ac_102973	0.00991019	0
HS_H3K27ac_102974	0.00891266	0
HS_H3K27ac_10299	0.00817204	0
HS_H3K27ac_103012	0.00911854	0
HS_H3K27ac_103013	0.0967603	0
HS_H3K27ac_103014	0.0079906	0
HS_H3K27ac_103016	0.00655022	0
HS_H3K27ac_103017	0.0193548	0
HS_H3K27ac_103023	0.00809958	0
HS_H3K27ac_103034	0.00642734	0
HS_H3K27ac_103044	0.0378822	0
HS_H3K27ac_103051	0.00777346	0
HS_H3K27ac_103055	0.00435414	0
HS_H3K27ac_103057	0.0109676	0
HS_H3K27ac_103058	0.0113828	0
HS_H3K27ac_103059	0.0102452	0
HS_H3K27ac_103060	0.0147667	0
HS_H3K27ac_103067	0.00898588	0
HS_H3K27ac_103068	0.00622191	0
HS_H3K27ac_103069	0.00610632	0
HS_H3K27ac_10307	0.0691489	0
HS_H3K27ac_103070	0.00566974	0
HS_H3K27ac_103071	0.00764045	0
HS_H3K27ac_103072	0.0128809	0
HS_H3K27ac_103073	0.00707182	0
HS_H3K27ac_103076	0.00966184	0
HS_H3K27ac_103077	0.00836268	0
HS_H3K27ac_103078	0.0480726	0
HS_H3K27ac_103079	0.00445765	0
HS_H3K27ac_10308	0.00671682	0
HS_H3K27ac_103081	0.00580757	0
HS_H3K27ac_103084	0.0106762	0
HS_H3K27ac_103085	0.0062526	0
HS_H3K27ac_10310	0.00687424	0
HS_H3K27ac_10311	0.0100587	0
HS_H3K27ac_103116	0.00714362	0
HS_H3K27ac_10312	0.0104167	0
HS_H3K27ac_103122	0.0103744	0
HS_H3K27ac_103123	0.0158333	0
HS_H3K27ac_103130	0.00887311	0
HS_H3K27ac_103131	0.110979	0
HS_H3K27ac_103134	0.0558933	0
HS_H3K27ac_103138	0.00773714	0
HS_H3K27ac_10314	0.0157738	0
HS_H3K27ac_103147	0.0117381	0
HS_H3K27ac_103148	0.0259887	0
HS_H3K27ac_103153	0.0254042	0
HS_H3K27ac_103155	0.0117381	0
HS_H3K27ac_103156	0.00853922	0
HS_H3K27ac_103159	0.0093232	0
HS_H3K27ac_10316	0.00984252	0
HS_H3K27ac_103160	0.00509276	0
HS_H3K27ac_103161	0.00958324	0
HS_H3K27ac_103162	0.0104927	0
HS_H3K27ac_103165	0.00847689	0
HS_H3K27ac_103166	0.0273433	0
HS_H3K27ac_103173	0.00952381	0
HS_H3K27ac_103178	0.0889976	0
HS_H3K27ac_103179	0.0107971	0
HS_H3K27ac_10318	0.0151242	0
HS_H3K27ac_103181	0.105398	0
HS_H3K27ac_103183	0.00801448	0
HS_H3K27ac_103185	0.0727273	0
HS_H3K27ac_103187	0.0253133	0
HS_H3K27ac_10319	0.0177007	0
HS_H3K27ac_103190	0.0104167	0
HS_H3K27ac_103191	0.00743707	0
HS_H3K27ac_103193	0.0116227	0
HS_H3K27ac_103194	0.0118846	0
HS_H3K27ac_103195	0.102761	0
HS_H3K27ac_103196	0.0099278	0
HS_H3K27ac_103197	0.00796636	0
HS_H3K27ac_103200	0.00868373	0
HS_H3K27ac_103202	0.00874795	0
HS_H3K27ac_103206	0.0078125	0
HS_H3K27ac_103208	0.00892484	0
HS_H3K27ac_10321	0.017868	0
HS_H3K27ac_103213	0.0102639	0
HS_H3K27ac_103216	0.0125997	0
HS_H3K27ac_103217	0.0131162	0
HS_H3K27ac_103218	0.0107672	0
HS_H3K27ac_103219	0.0109562	0
HS_H3K27ac_10322	0.00348584	0
HS_H3K27ac_103221	0.00708163	0
HS_H3K27ac_103223	0.00882613	0
HS_H3K27ac_103225	0.0121951	0
HS_H3K27ac_103226	0.0132725	0
HS_H3K27ac_103227	0.0107914	0
HS_H3K27ac_103228	0.0136869	0
HS_H3K27ac_103229	0.0192797	0
HS_H3K27ac_10323	0.0425035	0
HS_H3K27ac_103232	0.015165	0
HS_H3K27ac_103233	0.00756228	0
HS_H3K27ac_103234	0.114103	0
HS_H3K27ac_103238	0.046085	0
HS_H3K27ac_10324	0.0143669	0
HS_H3K27ac_103242	0.0109745	0
HS_H3K27ac_103243	0.0127817	0
HS_H3K27ac_103245	0.0121022	0
HS_H3K27ac_103246	0.0171797	0
HS_H3K27ac_103248	0.0239974	0
HS_H3K27ac_10325	0.00882353	0
HS_H3K27ac_103250	0.119536	0
HS_H3K27ac_103252	0.0571909	0
HS_H3K27ac_103253	0.0142412	0
HS_H3K27ac_103254	0.011653	0
HS_H3K27ac_103255	0.024593	0
HS_H3K27ac_103257	0.0809017	0
HS_H3K27ac_10326	0.0258065	0
HS_H3K27ac_103262	0.00967937	0
HS_H3K27ac_103264	0.0168833	0
HS_H3K27ac_10327	0.0117253	0
HS_H3K27ac_103272	0.0103175	0
HS_H3K27ac_103276	0.0128205	0
HS_H3K27ac_103277	0.00834376	0
HS_H3K27ac_103278	0.0107216	0
HS_H3K27ac_103279	0.00968736	0
HS_H3K27ac_103280	0.00786812	0
HS_H3K27ac_103282	0.00749064	0
HS_H3K27ac_10329	0.00912825	0
HS_H3K27ac_103290	0	0
HS_H3K27ac_103291	0.0100257	0
HS_H3K27ac_103292	0.00677283	0
HS_H3K27ac_103293	0.00649351	0
HS_H3K27ac_103294	0.0094093	0
HS_H3K27ac_10330	0.0118126	0
HS_H3K27ac_103300	0.0118317	0
HS_H3K27ac_103301	0.0046214	0
HS_H3K27ac_103302	0.00840336	0
HS_H3K27ac_103305	0.00725825	0
HS_H3K27ac_103308	0.00805085	0
HS_H3K27ac_103309	0.01551	0
HS_H3K27ac_10331	0.00983021	0
HS_H3K27ac_103311	0.00766907	0
HS_H3K27ac_103314	0.11232	0
HS_H3K27ac_103315	0.00620155	0
HS_H3K27ac_103319	0.0195982	0
HS_H3K27ac_10332	0.0146678	0
HS_H3K27ac_103327	0.0081448	0
HS_H3K27ac_103339	0.00714462	0
HS_H3K27ac_103345	0.00736789	0
HS_H3K27ac_103347	0.0385687	0
HS_H3K27ac_10335	0.0185425	0
HS_H3K27ac_103355	0.00738809	0
HS_H3K27ac_103359	0.0103777	0
HS_H3K27ac_10336	0.0104167	0
HS_H3K27ac_103360	0.0169364	0
HS_H3K27ac_103361	0.00640752	0
HS_H3K27ac_103362	0.0251287	0
HS_H3K27ac_103363	0.0993557	0
HS_H3K27ac_103364	0.0120157	0
HS_H3K27ac_103365	0.00762933	0
HS_H3K27ac_103368	0.0101652	0
HS_H3K27ac_103369	0.00934871	0
HS_H3K27ac_103370	0.00949487	0
HS_H3K27ac_103371	0.0138614	0
HS_H3K27ac_103373	0.0182656	0
HS_H3K27ac_103375	0.0481526	0
HS_H3K27ac_103381	0.0100301	0
HS_H3K27ac_10339	0.0124696	0
HS_H3K27ac_103390	0.00986482	0
HS_H3K27ac_103391	0.00913397	0
HS_H3K27ac_103395	0.0107191	0
HS_H3K27ac_103396	0.00874243	0
HS_H3K27ac_103397	0.0111012	0
HS_H3K27ac_103398	0.00835165	0
HS_H3K27ac_103400	0.166667	1
HS_H3K27ac_103401	0.00854701	0
HS_H3K27ac_103402	0.00977995	0
HS_H3K27ac_103403	0.00729714	0
HS_H3K27ac_103405	0.114998	0
HS_H3K27ac_103406	0.0108401	0
HS_H3K27ac_103407	0.010989	0
HS_H3K27ac_103409	0.0276008	0
HS_H3K27ac_10341	0.0117381	0
HS_H3K27ac_103410	0.00601202	0
HS_H3K27ac_103411	0.00746077	0
HS_H3K27ac_103412	0.00446229	0
HS_H3K27ac_103413	0.126254	0
HS_H3K27ac_103418	0.0266178	0
HS_H3K27ac_10342	0.0120208	0
HS_H3K27ac_103424	0.0104559	0
HS_H3K27ac_103425	0.014157	0
HS_H3K27ac_103426	0.00813422	0
HS_H3K27ac_103428	0.0100371	0
HS_H3K27ac_103433	0.0171209	0
HS_H3K27ac_103442	0.0059579	0
HS_H3K27ac_103444	0.0476623	0
HS_H3K27ac_103445	0.00853242	0
HS_H3K27ac_103446	0.0103554	0
HS_H3K27ac_103447	0.00536913	0
HS_H3K27ac_103448	0.00702181	0
HS_H3K27ac_103452	0.008908	0
HS_H3K27ac_103456	0.00856628	0
HS_H3K27ac_103457	0.00940666	0
HS_H3K27ac_103458	0.0141821	0
HS_H3K27ac_10346	0.0110661	0
HS_H3K27ac_103460	0.00933014	0
HS_H3K27ac_103463	0.00866496	0
HS_H3K27ac_103465	0.0108344	0
HS_H3K27ac_10347	0.0239373	0
HS_H3K27ac_103470	0.00717894	0
HS_H3K27ac_103473	0.00756228	0
HS_H3K27ac_10348	0.00984683	0
HS_H3K27ac_103484	0.0117463	0
HS_H3K27ac_103486	0.010697	0
HS_H3K27ac_103488	0.010365	0
HS_H3K27ac_103489	0.00945017	0
HS_H3K27ac_10349	0.0131245	0
HS_H3K27ac_103490	0.00816853	0
HS_H3K27ac_103491	0.00923169	0
HS_H3K27ac_103495	0.0118421	0
HS_H3K27ac_103496	0.00863931	0
HS_H3K27ac_103499	0.0131148	0
HS_H3K27ac_103500	0.00983865	0
HS_H3K27ac_103501	0.00991735	0
HS_H3K27ac_103502	0.00726257	0
HS_H3K27ac_103505	0.00751215	0
HS_H3K27ac_103506	0.00801094	0
HS_H3K27ac_103531	0.00921068	0
HS_H3K27ac_103536	0.059447	0
HS_H3K27ac_103537	0.0438922	0
HS_H3K27ac_103539	0.00532151	0
HS_H3K27ac_103540	0.0254514	0
HS_H3K27ac_103557	0.018532	0
HS_H3K27ac_10356	0.0368644	0
HS_H3K27ac_10357	0.0505272	0
HS_H3K27ac_103574	0.00827815	0
HS_H3K27ac_103575	0.00536433	0
HS_H3K27ac_103576	0.00795053	0
HS_H3K27ac_103578	0.0121896	0
HS_H3K27ac_103579	0.0158872	0
HS_H3K27ac_10358	0.00666667	0
HS_H3K27ac_103580	0.00714286	0
HS_H3K27ac_103583	0.00756534	0
HS_H3K27ac_103584	0.0204082	0
HS_H3K27ac_103586	0.0114504	0
HS_H3K27ac_103589	0.0105505	0
HS_H3K27ac_103590	0.00995208	0
HS_H3K27ac_103591	0.00945744	0
HS_H3K27ac_103609	0.00533333	0
HS_H3K27ac_103614	0.00813992	0
HS_H3K27ac_103617	0.0087108	0
HS_H3K27ac_103633	0.0107394	0
HS_H3K27ac_103634	0.00907519	0
HS_H3K27ac_103635	0.0113736	0
HS_H3K27ac_103636	0.0113759	0
HS_H3K27ac_103637	0.014157	0
HS_H3K27ac_103638	0.0142027	0
HS_H3K27ac_103639	0.00887311	0
HS_H3K27ac_103641	0.0108499	0
HS_H3K27ac_103642	0.00990525	0
HS_H3K27ac_103648	0.0104114	0
HS_H3K27ac_103656	0.0133125	0
HS_H3K27ac_103657	0.0512482	0
HS_H3K27ac_103660	0.0105189	0
HS_H3K27ac_103667	0.0117917	0
HS_H3K27ac_103669	0.0105018	0
HS_H3K27ac_103670	0.0121756	0
HS_H3K27ac_103673	0.0140208	0
HS_H3K27ac_103674	0.0111549	0
HS_H3K27ac_103677	0.00746269	0
HS_H3K27ac_10368	0.00902062	0
HS_H3K27ac_10369	0.00848828	0
HS_H3K27ac_103698	0.085423	0
HS_H3K27ac_103699	0.0128411	0
HS_H3K27ac_10370	0.00942408	0
HS_H3K27ac_103703	0.0252178	0
HS_H3K27ac_103704	0.0166521	0
HS_H3K27ac_103705	0.011691	0
HS_H3K27ac_103707	0.00810081	0
HS_H3K27ac_103708	0.00917431	0
HS_H3K27ac_103709	0.0107884	0
HS_H3K27ac_10371	0.00892061	0
HS_H3K27ac_103710	0.0143167	0
HS_H3K27ac_103711	0.0121896	0
HS_H3K27ac_103712	0.0124888	0
HS_H3K27ac_103713	0.0103185	0
HS_H3K27ac_103714	0.0155486	0
HS_H3K27ac_103715	0.00956106	0
HS_H3K27ac_103716	0.0131103	0
HS_H3K27ac_103717	0.00928382	0
HS_H3K27ac_103718	0.105218	0
HS_H3K27ac_10372	0.00971284	0
HS_H3K27ac_103721	0.0113032	0
HS_H3K27ac_103725	0.00832968	0
HS_H3K27ac_103726	0.0147398	0
HS_H3K27ac_10373	0.00928297	0
HS_H3K27ac_103730	0.0198246	0
HS_H3K27ac_103732	0.0125939	0
HS_H3K27ac_103735	0.0154819	0
HS_H3K27ac_103737	0.0130405	0
HS_H3K27ac_103738	0.0133254	0
HS_H3K27ac_103739	0.0147256	0
HS_H3K27ac_103740	0.0143691	0
HS_H3K27ac_103741	0.102737	0
HS_H3K27ac_103742	0.014966	0
HS_H3K27ac_103743	0.0154968	0
HS_H3K27ac_103745	0.0146406	0
HS_H3K27ac_103746	0.0107962	0
HS_H3K27ac_103749	0.0121896	0
HS_H3K27ac_103752	0.0060241	0
HS_H3K27ac_103753	0.0070491	0
HS_H3K27ac_103755	0.0106547	0
HS_H3K27ac_103758	0.0095515	0
HS_H3K27ac_103759	0.0118838	0
HS_H3K27ac_10376	0.00760834	0
HS_H3K27ac_103760	0.0065666	0
HS_H3K27ac_103761	0.0112816	0
HS_H3K27ac_103762	0.00965759	0
HS_H3K27ac_103763	0.0173536	0
HS_H3K27ac_103764	0.0161893	0
HS_H3K27ac_103766	0.00871978	0
HS_H3K27ac_103767	0.0140086	0
HS_H3K27ac_103769	0.0103717	0
HS_H3K27ac_103771	0.0101609	0
HS_H3K27ac_103772	0.0393593	0
HS_H3K27ac_103773	0.0121403	0
HS_H3K27ac_103775	0.00643604	0
HS_H3K27ac_103776	0.0105882	0
HS_H3K27ac_10378	0.0159035	0
HS_H3K27ac_103781	0.0145536	0
HS_H3K27ac_103782	0.0108131	0
HS_H3K27ac_103783	0.00992332	0
HS_H3K27ac_103789	0.00734976	0
HS_H3K27ac_103790	0.0083632	0
HS_H3K27ac_103795	0.00484848	0
HS_H3K27ac_103796	0.0122459	0
HS_H3K27ac_103797	0.0106224	0
HS_H3K27ac_103798	0.0125736	0
HS_H3K27ac_103799	0.00733496	0
HS_H3K27ac_10380	0.00684053	0
HS_H3K27ac_10381	0.0138975	0
HS_H3K27ac_103818	0.0130971	0
HS_H3K27ac_103819	0.0126156	0
HS_H3K27ac_103820	0.011535	0
HS_H3K27ac_103822	0.0143136	0
HS_H3K27ac_103823	0.00714924	0
HS_H3K27ac_103824	0.00968617	0
HS_H3K27ac_103825	0.0105634	0
HS_H3K27ac_103826	0.0143855	0
HS_H3K27ac_103827	0.0173147	0
HS_H3K27ac_103829	0.0229941	0
HS_H3K27ac_10383	0.00628053	0
HS_H3K27ac_103830	0.0148325	0
HS_H3K27ac_103833	0.021588	0
HS_H3K27ac_103834	0.0143737	0
HS_H3K27ac_103835	0.0132554	0
HS_H3K27ac_103837	0.0147965	0
HS_H3K27ac_103838	0.021972	0
HS_H3K27ac_103840	0.0150555	0
HS_H3K27ac_103842	0.0113887	0
HS_H3K27ac_103843	0.0145737	0
HS_H3K27ac_103846	0.0123177	0
HS_H3K27ac_103848	0.0076956	0
HS_H3K27ac_103849	0.0250223	0
HS_H3K27ac_10385	0.0161423	0
HS_H3K27ac_103850	0.0123321	0
HS_H3K27ac_103852	0.00702576	0
HS_H3K27ac_103854	0.0137268	0
HS_H3K27ac_103855	0.0105746	0
HS_H3K27ac_103859	0.0112508	0
HS_H3K27ac_103861	0.0102183	0
HS_H3K27ac_103863	0.0168365	0
HS_H3K27ac_103864	0.0147186	0
HS_H3K27ac_103866	0.0193154	0
HS_H3K27ac_103867	0.0188019	0
HS_H3K27ac_103868	0.0186999	0
HS_H3K27ac_103869	0.0192644	0
HS_H3K27ac_103870	0.0158802	0
HS_H3K27ac_103873	0.00940018	0
HS_H3K27ac_103875	0.0454695	0
HS_H3K27ac_103876	0.00941704	0
HS_H3K27ac_103877	0.0120805	0
HS_H3K27ac_103878	0.0108178	0
HS_H3K27ac_103879	0.0119205	0
HS_H3K27ac_10388	0	0
HS_H3K27ac_103880	0.0228728	0
HS_H3K27ac_103881	0.0152672	0
HS_H3K27ac_103882	0.017094	0
HS_H3K27ac_103883	0.0734967	0
HS_H3K27ac_103885	0.0089841	0
HS_H3K27ac_103888	0.00770308	0
HS_H3K27ac_103889	0.0171657	0
HS_H3K27ac_10389	0.00973133	0
HS_H3K27ac_103890	0.10356	0
HS_H3K27ac_103895	0.012945	0
HS_H3K27ac_103896	0.0139816	0
HS_H3K27ac_103907	0.00496689	0
HS_H3K27ac_103908	0.016475	0
HS_H3K27ac_103913	0.0141037	0
HS_H3K27ac_103917	0.0146761	0
HS_H3K27ac_103921	0.0227984	0
HS_H3K27ac_103923	0.0123784	0
HS_H3K27ac_103924	0.010247	0
HS_H3K27ac_103926	0.0164954	0
HS_H3K27ac_103927	0.0183527	0
HS_H3K27ac_103928	0.0122283	0
HS_H3K27ac_103929	0.0225989	0
HS_H3K27ac_103930	0.0108254	0
HS_H3K27ac_103931	0.0130454	0
HS_H3K27ac_103932	0.0199915	0
HS_H3K27ac_103933	0.01959	0
HS_H3K27ac_103934	0.0254091	0
HS_H3K27ac_103935	0.0267158	0
HS_H3K27ac_103936	0.00176056	0
HS_H3K27ac_103945	0.00692905	0
HS_H3K27ac_103954	0.0118786	0
HS_H3K27ac_103955	0.00745287	0
HS_H3K27ac_103956	0.0112309	0
HS_H3K27ac_103957	0.00765957	0
HS_H3K27ac_103958	0.00854701	0
HS_H3K27ac_103959	0.00875273	0
HS_H3K27ac_103961	0.00759173	0
HS_H3K27ac_103963	0.0145867	0
HS_H3K27ac_103967	0.0125865	0
HS_H3K27ac_103968	0.00958466	0
HS_H3K27ac_103970	0.0131579	0
HS_H3K27ac_103971	0.00987973	0
HS_H3K27ac_103972	0.00718194	0
HS_H3K27ac_103975	0.0110203	0
HS_H3K27ac_103977	0.0189055	0
HS_H3K27ac_103978	0.0182149	0
HS_H3K27ac_103981	0.007034	0
HS_H3K27ac_103982	0.00891902	0
HS_H3K27ac_103983	0.0128262	0
HS_H3K27ac_103984	0.0142857	0
HS_H3K27ac_103985	0.0102041	0
HS_H3K27ac_103986	0.0133393	0
HS_H3K27ac_103990	0.0129132	0
HS_H3K27ac_103992	0.0119787	0
HS_H3K27ac_103993	0.00923077	0
HS_H3K27ac_103994	0.0117344	0
HS_H3K27ac_103996	0.0130152	0
HS_H3K27ac_103999	0.0133065	0
HS_H3K27ac_104000	0.0171713	0
HS_H3K27ac_104001	0.0463918	0
HS_H3K27ac_104004	0.011925	0
HS_H3K27ac_104005	0.0176152	0
HS_H3K27ac_104006	0.0312913	0
HS_H3K27ac_104007	0.00644884	0
HS_H3K27ac_104008	0.0107571	0
HS_H3K27ac_104009	0.0180458	0
HS_H3K27ac_104010	0.0144144	0
HS_H3K27ac_104011	0.0137931	0
HS_H3K27ac_104012	0.0181031	0
HS_H3K27ac_10402	0.0076365	0
HS_H3K27ac_104027	0.0124524	0
HS_H3K27ac_104028	0.00623247	0
HS_H3K27ac_104029	0.0246067	0
HS_H3K27ac_10403	0.0143218	0
HS_H3K27ac_104030	0.0129293	0
HS_H3K27ac_104031	0.0202936	0
HS_H3K27ac_104032	0.0157368	0
HS_H3K27ac_104033	0.0115169	0
HS_H3K27ac_104044	0.0103872	0
HS_H3K27ac_104045	0.00713013	0
HS_H3K27ac_104046	0.0110767	0
HS_H3K27ac_104047	0.00867225	0
HS_H3K27ac_104048	0.0103697	0
HS_H3K27ac_104049	0.00833333	0
HS_H3K27ac_10405	0.0119808	0
HS_H3K27ac_104050	0.00985402	0
HS_H3K27ac_104051	0.00759696	0
HS_H3K27ac_104052	0.0109375	0
HS_H3K27ac_104053	0.0251236	0
HS_H3K27ac_104055	0.00799645	0
HS_H3K27ac_104056	0.0213442	0
HS_H3K27ac_104057	0.0116983	0
HS_H3K27ac_104058	0.00886918	0
HS_H3K27ac_104059	0.00232019	0
HS_H3K27ac_104066	0.0136324	0
HS_H3K27ac_104067	0.0110181	0
HS_H3K27ac_104071	0.0149722	0
HS_H3K27ac_104074	0.00901481	0
HS_H3K27ac_104075	0.0111397	0
HS_H3K27ac_104080	0.0156111	0
HS_H3K27ac_104090	0.0116533	0
HS_H3K27ac_104091	0.0950129	0
HS_H3K27ac_104094	0.011542	0
HS_H3K27ac_10410	0.0126414	0
HS_H3K27ac_104109	0.00836268	0
HS_H3K27ac_104110	0.0222372	0
HS_H3K27ac_104112	0.019678	0
HS_H3K27ac_104113	0.0164271	0
HS_H3K27ac_104115	0.016158	0
HS_H3K27ac_10412	0.00583221	0
HS_H3K27ac_104120	0.0145889	0
HS_H3K27ac_104121	0.010045	0
HS_H3K27ac_104122	0.016317	0
HS_H3K27ac_104123	0.017416	0
HS_H3K27ac_104124	0.0145503	0
HS_H3K27ac_104125	0.0157516	0
HS_H3K27ac_104131	0.0071965	0
HS_H3K27ac_104132	0.0103791	0
HS_H3K27ac_104133	0.00972927	0
HS_H3K27ac_104134	0.01051	0
HS_H3K27ac_104135	0.0112613	0
HS_H3K27ac_104137	0.0131044	0
HS_H3K27ac_104138	0.0294949	0
HS_H3K27ac_104139	0.0151246	0
HS_H3K27ac_10414	0	0
HS_H3K27ac_104140	0.0113515	0
HS_H3K27ac_10415	0.0165153	0
HS_H3K27ac_10418	0.00635863	0
HS_H3K27ac_104182	0.00920887	0
HS_H3K27ac_104184	0.0104987	0
HS_H3K27ac_104187	0.0168029	0
HS_H3K27ac_104188	0.0331187	0
HS_H3K27ac_104190	0.00990099	0
HS_H3K27ac_104194	0.0120482	0
HS_H3K27ac_104195	0.0143431	0
HS_H3K27ac_104205	0.0143541	0
HS_H3K27ac_104207	0.016122	0
HS_H3K27ac_104226	0.0103278	0
HS_H3K27ac_104230	0.00541126	0
HS_H3K27ac_104233	0.0108157	0
HS_H3K27ac_104236	0.0121951	0
HS_H3K27ac_10424	0.00817132	0
HS_H3K27ac_104240	0.0138223	0
HS_H3K27ac_104245	0.00891947	0
HS_H3K27ac_104250	0.00978179	0
HS_H3K27ac_104251	0.00959233	0
HS_H3K27ac_104269	0.00936101	0
HS_H3K27ac_104279	0.0176941	0
HS_H3K27ac_10428	0.00884956	0
HS_H3K27ac_104284	0.00550017	0
HS_H3K27ac_104285	0.00682687	0
HS_H3K27ac_104286	0.0269815	0
HS_H3K27ac_104287	0.0153986	0
HS_H3K27ac_104288	0.0176735	0
HS_H3K27ac_104289	0.0116883	0
HS_H3K27ac_10429	0.00852985	0
HS_H3K27ac_104298	0.0134953	0
HS_H3K27ac_104299	0.0134159	0
HS_H3K27ac_10430	0.0100685	0
HS_H3K27ac_104300	0.0067086	0
HS_H3K27ac_104301	0.0117188	0
HS_H3K27ac_104302	0.00389105	0
HS_H3K27ac_104303	0.00823181	0
HS_H3K27ac_104304	0.00999546	0
HS_H3K27ac_104309	0.0719519	0
HS_H3K27ac_10431	0.0115299	0
HS_H3K27ac_104315	0.0048014	0
HS_H3K27ac_104318	0.00937298	0
HS_H3K27ac_10432	0.0095216	0
HS_H3K27ac_104320	0.00854409	0
HS_H3K27ac_104323	0.0163191	0
HS_H3K27ac_104330	0.00530504	0
HS_H3K27ac_104336	0.0125766	0
HS_H3K27ac_104338	0.0170176	0
HS_H3K27ac_104339	0.00788835	0
HS_H3K27ac_10434	0.0843267	0
HS_H3K27ac_104340	0.00869565	0
HS_H3K27ac_104341	0.00563747	0
HS_H3K27ac_104342	0.0102123	0
HS_H3K27ac_104344	0.0686807	0
HS_H3K27ac_104346	0.0164097	0
HS_H3K27ac_104347	0.00910317	0
HS_H3K27ac_104348	0.013308	0
HS_H3K27ac_104357	0.0196604	0
HS_H3K27ac_10436	0.00721421	0
HS_H3K27ac_104360	0.0287253	0
HS_H3K27ac_104361	0.0219691	0
HS_H3K27ac_104364	0.0191111	0
HS_H3K27ac_104370	0.0120137	0
HS_H3K27ac_104371	0.00729217	0
HS_H3K27ac_104372	0.0127462	0
HS_H3K27ac_104373	0.0149186	0
HS_H3K27ac_104375	0.0079636	0
HS_H3K27ac_104377	0.00808024	0
HS_H3K27ac_104378	0.0134315	0
HS_H3K27ac_104379	0.0158156	0
HS_H3K27ac_104380	0.0220706	0
HS_H3K27ac_104382	0.0122271	0
HS_H3K27ac_104384	0	0
HS_H3K27ac_104385	0.00819462	0
HS_H3K27ac_104390	0.0106952	0
HS_H3K27ac_104391	0.0128611	0
HS_H3K27ac_104393	0.00384615	0
HS_H3K27ac_104396	0.0166952	0
HS_H3K27ac_104398	0.00981705	0
HS_H3K27ac_104401	0.00910816	0
HS_H3K27ac_104402	0.0405784	0
HS_H3K27ac_104403	0.0111675	0
HS_H3K27ac_104405	0.0118681	0
HS_H3K27ac_104406	0.00998711	0
HS_H3K27ac_104407	0.0081646	0
HS_H3K27ac_104412	0.0137411	0
HS_H3K27ac_104420	0.00937082	0
HS_H3K27ac_104427	0.0223577	0
HS_H3K27ac_104429	0.0113524	0
HS_H3K27ac_104430	0.00903751	0
HS_H3K27ac_104431	0.0122481	0
HS_H3K27ac_104434	0.011889	0
HS_H3K27ac_104435	0.00990991	0
HS_H3K27ac_104436	0.0164005	0
HS_H3K27ac_104437	0.0114135	0
HS_H3K27ac_104438	0.0152039	0
HS_H3K27ac_104439	0.0220207	0
HS_H3K27ac_104440	0.0156495	0
HS_H3K27ac_104446	0.00673905	0
HS_H3K27ac_104450	0.0171598	0
HS_H3K27ac_104453	0.0197233	0
HS_H3K27ac_104454	0.015688	0
HS_H3K27ac_104455	0.00896861	0
HS_H3K27ac_104456	0.0166251	0
HS_H3K27ac_104457	0.01373	0
HS_H3K27ac_104462	0.00847218	0
HS_H3K27ac_104464	0.072237	0
HS_H3K27ac_104466	0.00881057	0
HS_H3K27ac_104469	0.00583942	0
HS_H3K27ac_10448	0.00672344	0
HS_H3K27ac_104482	0.0492653	0
HS_H3K27ac_104483	0.00450161	0
HS_H3K27ac_104486	0.0117692	0
HS_H3K27ac_104490	0.00355714	0
HS_H3K27ac_104491	0.00631821	0
HS_H3K27ac_104492	0.0064711	0
HS_H3K27ac_104493	0.0163339	0
HS_H3K27ac_104494	0.0124756	0
HS_H3K27ac_104495	0.0137819	0
HS_H3K27ac_104496	0.014461	0
HS_H3K27ac_104497	0.0140187	0
HS_H3K27ac_104501	0.0137363	0
HS_H3K27ac_104502	0.0144866	0
HS_H3K27ac_104503	0.00946372	0
HS_H3K27ac_104504	0.00827301	0
HS_H3K27ac_104505	0.0114698	0
HS_H3K27ac_104506	0.0134083	0
HS_H3K27ac_104507	0.0132188	0
HS_H3K27ac_104508	0.0300078	0
HS_H3K27ac_104510	0.00731113	0
HS_H3K27ac_104514	0.0164541	0
HS_H3K27ac_104520	0.00892857	0
HS_H3K27ac_104521	0.0094552	0
HS_H3K27ac_104522	0.0198105	0
HS_H3K27ac_104523	0.0191231	0
HS_H3K27ac_104525	0.00622524	0
HS_H3K27ac_104526	0.0105402	0
HS_H3K27ac_104527	0.0127619	0
HS_H3K27ac_104528	0.0099438	0
HS_H3K27ac_104529	0.0139766	0
HS_H3K27ac_104530	0.00773861	0
HS_H3K27ac_104531	0.0077998	0
HS_H3K27ac_104532	0.00865513	0
HS_H3K27ac_104533	0.00699663	0
HS_H3K27ac_104537	0.00725875	0
HS_H3K27ac_104538	0.0181269	1
HS_H3K27ac_104539	0.0087184	0
HS_H3K27ac_104540	0.0137533	0
HS_H3K27ac_104541	0.00972105	0
HS_H3K27ac_104542	0.019024	0
HS_H3K27ac_104543	0.0118962	0
HS_H3K27ac_104544	0.00998574	0
HS_H3K27ac_104545	0.039312	1
HS_H3K27ac_104547	0.0138037	0
HS_H3K27ac_104548	0.0117697	0
HS_H3K27ac_104549	0.0125759	0
HS_H3K27ac_10455	0.00910273	0
HS_H3K27ac_104551	0.0134348	0
HS_H3K27ac_104552	0.0123307	0
HS_H3K27ac_104556	0.00960061	0
HS_H3K27ac_104557	0.0104941	0
HS_H3K27ac_104558	0.00592467	0
HS_H3K27ac_10456	0.00697604	0
HS_H3K27ac_104561	0.00834106	0
HS_H3K27ac_104563	0.0124169	0
HS_H3K27ac_104564	0.00928382	0
HS_H3K27ac_10457	0.00664011	0
HS_H3K27ac_104571	0.0109529	0
HS_H3K27ac_104572	0.0112117	0
HS_H3K27ac_104573	0.013933	0
HS_H3K27ac_104575	0.00762094	0
HS_H3K27ac_104576	0.00729927	0
HS_H3K27ac_104578	0.00789946	0
HS_H3K27ac_104579	0.010643	0
HS_H3K27ac_10458	0.00744634	0
HS_H3K27ac_104581	0.0131081	0
HS_H3K27ac_104586	0.0102796	0
HS_H3K27ac_104589	0.00574459	0
HS_H3K27ac_10459	0.011883	0
HS_H3K27ac_104590	0.0087822	0
HS_H3K27ac_104591	0.0105587	0
HS_H3K27ac_104592	0.00551572	0
HS_H3K27ac_104594	0.0156111	0
HS_H3K27ac_104595	0.0123033	0
HS_H3K27ac_104597	0.0136571	0
HS_H3K27ac_104599	0.137488	0
HS_H3K27ac_10460	0.00621547	0
HS_H3K27ac_104600	0.0127361	0
HS_H3K27ac_104601	0.00700219	0
HS_H3K27ac_104602	0.00985222	0
HS_H3K27ac_104603	0.00671937	0
HS_H3K27ac_104604	0.00758853	0
HS_H3K27ac_104609	0.011889	0
HS_H3K27ac_10461	0.0102679	0
HS_H3K27ac_104610	0.0177074	0
HS_H3K27ac_104611	0.0143037	0
HS_H3K27ac_104612	0.0091417	0
HS_H3K27ac_104619	0.00899685	0
HS_H3K27ac_10462	0.0200562	0
HS_H3K27ac_104620	0.0202361	0
HS_H3K27ac_104623	0.0143206	0
HS_H3K27ac_104625	0.0328629	0
HS_H3K27ac_104629	0.0123077	0
HS_H3K27ac_10463	0.0104242	0
HS_H3K27ac_104630	0.0153903	0
HS_H3K27ac_104631	0.0105263	0
HS_H3K27ac_104632	0.0112867	0
HS_H3K27ac_104633	0.0273415	0
HS_H3K27ac_104634	0.0123692	0
HS_H3K27ac_104635	0.0125786	0
HS_H3K27ac_104637	0.0115875	0
HS_H3K27ac_104638	0.0182648	0
HS_H3K27ac_10464	0.0107887	0
HS_H3K27ac_104640	0.0138559	0
HS_H3K27ac_104641	0.0143325	0
HS_H3K27ac_104642	0.00306749	1
HS_H3K27ac_104643	0.0109023	0
HS_H3K27ac_104644	0.0090566	0
HS_H3K27ac_104645	0.00828795	0
HS_H3K27ac_104647	0.00582176	0
HS_H3K27ac_104648	0.0105457	0
HS_H3K27ac_104651	0.0120028	0
HS_H3K27ac_104653	0.0247361	0
HS_H3K27ac_104655	0.0288316	0
HS_H3K27ac_104656	0.0147106	0
HS_H3K27ac_104657	0.0114943	0
HS_H3K27ac_104658	0.0107697	0
HS_H3K27ac_104660	0.0145128	0
HS_H3K27ac_104662	0.0136324	0
HS_H3K27ac_104663	0.0195478	0
HS_H3K27ac_104666	0.0115299	0
HS_H3K27ac_104667	0.0226481	0
HS_H3K27ac_104668	0.0114043	0
HS_H3K27ac_104669	0.0108505	0
HS_H3K27ac_104671	0.0166145	0
HS_H3K27ac_104675	0.01566	0
HS_H3K27ac_104676	0.0217683	0
HS_H3K27ac_104678	0.0113086	0
HS_H3K27ac_104679	0.0155091	0
HS_H3K27ac_104682	0.0111524	0
HS_H3K27ac_104684	0.0214979	0
HS_H3K27ac_104685	0.0137836	0
HS_H3K27ac_104686	0.0148628	0
HS_H3K27ac_104687	0.0152275	0
HS_H3K27ac_104690	0.0120907	0
HS_H3K27ac_104692	0.0138094	0
HS_H3K27ac_104693	0.134989	0
HS_H3K27ac_104695	0.0114487	0
HS_H3K27ac_104696	0.0121896	0
HS_H3K27ac_104697	0.0181182	0
HS_H3K27ac_104699	0.0181765	0
HS_H3K27ac_104701	0.0159134	0
HS_H3K27ac_104702	0.0129853	0
HS_H3K27ac_104708	0.0116919	0
HS_H3K27ac_104709	0.00865801	0
HS_H3K27ac_10471	0.0133524	0
HS_H3K27ac_104710	0.0312981	0
HS_H3K27ac_104715	0.012991	0
HS_H3K27ac_104718	0.0129987	0
HS_H3K27ac_104719	0.00562852	0
HS_H3K27ac_10472	0.0116279	0
HS_H3K27ac_104720	0.00511727	0
HS_H3K27ac_104721	0.0138331	0
HS_H3K27ac_104722	0.0126478	0
HS_H3K27ac_104724	0.00933489	0
HS_H3K27ac_104725	0.00843263	0
HS_H3K27ac_104729	0.0088645	0
HS_H3K27ac_104730	0.00999201	0
HS_H3K27ac_104731	0.0110024	0
HS_H3K27ac_104733	0.0088	0
HS_H3K27ac_104734	0.0120053	0
HS_H3K27ac_104735	0.0221239	0
HS_H3K27ac_104736	0.0111248	0
HS_H3K27ac_104739	0.013312	0
HS_H3K27ac_10474	0.00756716	0
HS_H3K27ac_104741	0.012521	0
HS_H3K27ac_104744	0.0275838	0
HS_H3K27ac_104746	0.0117493	0
HS_H3K27ac_104747	0.00873515	0
HS_H3K27ac_104749	0.00749136	0
HS_H3K27ac_10475	0.00855085	0
HS_H3K27ac_104750	0.0125504	0
HS_H3K27ac_104754	0.00833699	0
HS_H3K27ac_104756	0.122071	0
HS_H3K27ac_10476	0.00854369	0
HS_H3K27ac_104762	0.00808625	0
HS_H3K27ac_104764	0.0824129	0
HS_H3K27ac_104765	0.00818613	0
HS_H3K27ac_104766	0.00540541	0
HS_H3K27ac_104767	0.0119352	0
HS_H3K27ac_104768	0.0157964	0
HS_H3K27ac_104769	0.0174738	0
HS_H3K27ac_104771	0.012	0
HS_H3K27ac_104773	0.0105634	0
HS_H3K27ac_104779	0.0106842	0
HS_H3K27ac_10478	0.0130513	0
HS_H3K27ac_10479	0.0134387	0
HS_H3K27ac_104791	0.0103538	0
HS_H3K27ac_104792	0.0113972	0
HS_H3K27ac_104793	0.0120482	0
HS_H3K27ac_104794	0.0116747	0
HS_H3K27ac_104795	0.00930439	0
HS_H3K27ac_104796	0.0113488	0
HS_H3K27ac_104797	0.00824295	0
HS_H3K27ac_104798	0.0104646	0
HS_H3K27ac_104799	0.0113971	0
HS_H3K27ac_10480	0.0146751	0
HS_H3K27ac_104800	0.0145246	0
HS_H3K27ac_104801	0.00990991	0
HS_H3K27ac_104802	0.0151951	0
HS_H3K27ac_10481	0.118146	0
HS_H3K27ac_104814	0.00883889	0
HS_H3K27ac_104815	0.0110384	0
HS_H3K27ac_104816	0.00572246	0
HS_H3K27ac_104817	0.0123839	0
HS_H3K27ac_104818	0.0112406	0
HS_H3K27ac_104819	0.00698758	0
HS_H3K27ac_10482	0.0069541	0
HS_H3K27ac_104820	0.0112949	0
HS_H3K27ac_104821	0.0090703	0
HS_H3K27ac_104827	0.00839631	0
HS_H3K27ac_104828	0.0161736	0
HS_H3K27ac_104829	0.0178917	0
HS_H3K27ac_10483	0.0162637	0
HS_H3K27ac_104830	0.00808989	0
HS_H3K27ac_104831	0.00779558	0
HS_H3K27ac_104834	0.00845666	1
HS_H3K27ac_104836	0.00940291	0
HS_H3K27ac_10484	0.0148741	0
HS_H3K27ac_104841	0.00978648	0
HS_H3K27ac_104842	0.00512511	0
HS_H3K27ac_104844	0.00599341	0
HS_H3K27ac_104846	0.10602	0
HS_H3K27ac_104847	0.00927459	0
HS_H3K27ac_104849	0.014782	0
HS_H3K27ac_10485	0.0117188	0
HS_H3K27ac_104854	0.00959693	0
HS_H3K27ac_104855	0.0127534	0
HS_H3K27ac_104856	0.0118074	0
HS_H3K27ac_104857	0.0221304	0
HS_H3K27ac_104858	0.00472953	0
HS_H3K27ac_104859	0.00466745	0
HS_H3K27ac_10486	0.00914634	0
HS_H3K27ac_104861	0.0076582	0
HS_H3K27ac_104862	0.00538117	0
HS_H3K27ac_104869	0.0117052	0
HS_H3K27ac_104871	0.0112461	0
HS_H3K27ac_104872	0.0127262	0
HS_H3K27ac_104874	0.0133226	0
HS_H3K27ac_104875	0.0122188	0
HS_H3K27ac_104876	0.0141907	0
HS_H3K27ac_104877	0.0150136	0
HS_H3K27ac_104878	0.0107567	0
HS_H3K27ac_104879	0.00816882	0
HS_H3K27ac_10488	0.00719425	0
HS_H3K27ac_104880	0.0134923	0
HS_H3K27ac_104881	0.0093068	0
HS_H3K27ac_104883	0.0170999	0
HS_H3K27ac_104884	0.0161177	0
HS_H3K27ac_104885	0.111005	0
HS_H3K27ac_104886	0.130359	0
HS_H3K27ac_104888	0.0135808	0
HS_H3K27ac_104889	0.0255183	0
HS_H3K27ac_10489	0.00905953	0
HS_H3K27ac_104890	0.015625	0
HS_H3K27ac_104891	0.0078637	0
HS_H3K27ac_104895	0.0260716	0
HS_H3K27ac_104898	0.0144995	0
HS_H3K27ac_10490	0.00952381	0
HS_H3K27ac_104901	0.0138585	0
HS_H3K27ac_10491	0.0121185	0
HS_H3K27ac_10492	0.012116	0
HS_H3K27ac_10493	0.0144811	0
HS_H3K27ac_10494	0.0113876	0
HS_H3K27ac_10495	0.00961881	0
HS_H3K27ac_10496	0.0109314	0
HS_H3K27ac_10497	0.103531	0
HS_H3K27ac_105057	0.00740878	0
HS_H3K27ac_105060	0.0101434	0
HS_H3K27ac_105063	0.0118812	0
HS_H3K27ac_105292	0.00845937	0
HS_H3K27ac_105301	0.0108932	0
HS_H3K27ac_105303	0.00954979	0
HS_H3K27ac_105307	0.00705882	0
HS_H3K27ac_105313	0.140029	0
HS_H3K27ac_10533	0.0371831	0
HS_H3K27ac_105341	0.0138889	0
HS_H3K27ac_10535	0.00889248	0
HS_H3K27ac_10539	0.00383632	0
HS_H3K27ac_10540	0.0130143	0
HS_H3K27ac_105405	0.0125892	0
HS_H3K27ac_105409	0.00868486	0
HS_H3K27ac_10541	0.10308	0
HS_H3K27ac_105410	0.144074	0
HS_H3K27ac_105413	0.0857627	0
HS_H3K27ac_10542	0.0178955	0
HS_H3K27ac_10543	0.0124899	0
HS_H3K27ac_10544	0.105914	0
HS_H3K27ac_10547	0.0712825	0
HS_H3K27ac_10551	0.0168964	0
HS_H3K27ac_10552	0.00938338	0
HS_H3K27ac_10553	0.0103093	0
HS_H3K27ac_105548	0.00647549	0
HS_H3K27ac_105549	0.00974967	0
HS_H3K27ac_10555	0.00791177	0
HS_H3K27ac_105550	0.0117381	0
HS_H3K27ac_10557	0.0202475	0
HS_H3K27ac_105573	0.00928505	0
HS_H3K27ac_105575	0.0104457	0
HS_H3K27ac_10558	0.0114845	0
HS_H3K27ac_10559	0.0965886	0
HS_H3K27ac_105629	0.00156495	0
HS_H3K27ac_10567	0.032967	0
HS_H3K27ac_10568	0.00791557	0
HS_H3K27ac_10569	0.00784077	0
HS_H3K27ac_10570	0.00854066	0
HS_H3K27ac_105700	0.00589496	0
HS_H3K27ac_105702	0.0101054	0
HS_H3K27ac_105703	0.00964453	0
HS_H3K27ac_105704	0.00354453	0
HS_H3K27ac_105705	0.00988468	0
HS_H3K27ac_105706	0.00806794	0
HS_H3K27ac_105707	0.0101376	0
HS_H3K27ac_105708	0.0101394	0
HS_H3K27ac_105709	0.0444618	0
HS_H3K27ac_105710	0.00668287	0
HS_H3K27ac_105712	0.00858001	0
HS_H3K27ac_105713	0.00897036	0
HS_H3K27ac_105717	0.00996377	0
HS_H3K27ac_105718	0.012185	0
HS_H3K27ac_10572	0.0079858	0
HS_H3K27ac_10573	0.00766802	0
HS_H3K27ac_10575	0.0118943	0
HS_H3K27ac_10579	0.0100128	0
HS_H3K27ac_105798	0.0209607	0
HS_H3K27ac_105801	0.00798935	0
HS_H3K27ac_105802	0.0197932	0
HS_H3K27ac_105804	0.00981932	0
HS_H3K27ac_105812	0.00820513	0
HS_H3K27ac_105813	0.0147401	0
HS_H3K27ac_105820	0.0096875	0
HS_H3K27ac_105821	0.0132042	0
HS_H3K27ac_105822	0.0106667	0
HS_H3K27ac_105823	0.0110991	0
HS_H3K27ac_105827	0.0119166	0
HS_H3K27ac_10583	0.0112747	0
HS_H3K27ac_105840	0.0188403	0
HS_H3K27ac_105851	0.00880411	0
HS_H3K27ac_105852	0.0173179	0
HS_H3K27ac_105853	0.0171429	0
HS_H3K27ac_105854	0.0100799	0
HS_H3K27ac_105855	0.0125224	0
HS_H3K27ac_105856	0.0155699	0
HS_H3K27ac_105859	0.0191138	0
HS_H3K27ac_10586	0.0103991	0
HS_H3K27ac_105860	0.00911162	0
HS_H3K27ac_105866	0.0140135	0
HS_H3K27ac_105868	0.0170306	0
HS_H3K27ac_105869	0.0108969	0
HS_H3K27ac_10587	0.00979564	0
HS_H3K27ac_105870	0.0136864	0
HS_H3K27ac_105872	0.00899281	0
HS_H3K27ac_105874	0.12019	0
HS_H3K27ac_105875	0.00977011	0
HS_H3K27ac_105876	0.0116279	0
HS_H3K27ac_105877	0.0196507	0
HS_H3K27ac_105880	0.0129342	0
HS_H3K27ac_105881	0.0133028	0
HS_H3K27ac_105883	0.0236256	0
HS_H3K27ac_105884	0.0161208	0
HS_H3K27ac_105887	0.0246688	0
HS_H3K27ac_105888	0.10743	0
HS_H3K27ac_105891	0.0272777	0
HS_H3K27ac_105893	0.120805	0
HS_H3K27ac_105894	0.00729927	0
HS_H3K27ac_105895	0.0116788	0
HS_H3K27ac_105896	0.00738916	0
HS_H3K27ac_105897	0.00966075	0
HS_H3K27ac_105900	0.0112086	0
HS_H3K27ac_105908	0.00918635	0
HS_H3K27ac_105909	0.0132275	0
HS_H3K27ac_105911	0.0578924	0
HS_H3K27ac_105912	0.019297	0
HS_H3K27ac_105914	0.016444	0
HS_H3K27ac_105915	0.0108421	0
HS_H3K27ac_105917	0.00687285	0
HS_H3K27ac_105928	0.00720072	0
HS_H3K27ac_105929	0.0178883	0
HS_H3K27ac_10593	0.00901846	0
HS_H3K27ac_105930	0.0204415	0
HS_H3K27ac_105931	0.00847745	0
HS_H3K27ac_105933	0.0218839	0
HS_H3K27ac_105934	0.0122783	0
HS_H3K27ac_105935	0.0533104	0
HS_H3K27ac_105938	0.00844444	0
HS_H3K27ac_105939	0.0107095	0
HS_H3K27ac_105940	0.0126582	0
HS_H3K27ac_105941	0.0147059	0
HS_H3K27ac_105942	0.0163191	0
HS_H3K27ac_105943	0.0126869	0
HS_H3K27ac_105944	0.0256293	0
HS_H3K27ac_105945	0.021875	0
HS_H3K27ac_105946	0.00673552	0
HS_H3K27ac_105947	0.0235411	0
HS_H3K27ac_105948	0.00813008	0
HS_H3K27ac_105949	0.00703844	0
HS_H3K27ac_105950	0.0117329	0
HS_H3K27ac_105951	0.00538841	0
HS_H3K27ac_105953	0.00797166	0
HS_H3K27ac_105957	0.00990312	0
HS_H3K27ac_105958	0.011631	0
HS_H3K27ac_105959	0.00949797	0
HS_H3K27ac_105964	0.0082282	0
HS_H3K27ac_105968	0.00801833	0
HS_H3K27ac_105972	0.0119258	0
HS_H3K27ac_105977	0.00720326	0
HS_H3K27ac_105981	0.00689103	0
HS_H3K27ac_105989	0.013913	0
HS_H3K27ac_105991	0.0133829	0
HS_H3K27ac_105992	0.00967622	0
HS_H3K27ac_105993	0.0162003	0
HS_H3K27ac_105994	0.0104457	0
HS_H3K27ac_105995	0.013578	0
HS_H3K27ac_105996	0.00634921	0
HS_H3K27ac_105999	0.0158586	0
HS_H3K27ac_106002	0.0113935	0
HS_H3K27ac_106003	0.00605582	0
HS_H3K27ac_106005	0.00734659	0
HS_H3K27ac_106006	0.0123115	0
HS_H3K27ac_106008	0.0174419	0
HS_H3K27ac_10602	0.0119342	0
HS_H3K27ac_106022	0.0209186	0
HS_H3K27ac_106029	0.0131112	0
HS_H3K27ac_10603	0.0172414	0
HS_H3K27ac_10604	0.136629	0
HS_H3K27ac_106047	0.0075455	0
HS_H3K27ac_106048	0.00962155	0
HS_H3K27ac_106049	0.0180952	0
HS_H3K27ac_106050	0.0113276	0
HS_H3K27ac_106055	0.0118214	0
HS_H3K27ac_106056	0.00987876	0
HS_H3K27ac_106057	0.018598	0
HS_H3K27ac_106058	0.00472712	0
HS_H3K27ac_106059	0.009996	0
HS_H3K27ac_10606	0.011943	0
HS_H3K27ac_106060	0.0159414	0
HS_H3K27ac_106061	0.0145388	0
HS_H3K27ac_106062	0.0161128	0
HS_H3K27ac_106063	0.0147441	0
HS_H3K27ac_106064	0.0176311	0
HS_H3K27ac_106065	0.0169664	0
HS_H3K27ac_106066	0.0132159	0
HS_H3K27ac_106067	0.0142558	0
HS_H3K27ac_106068	0.00978408	0
HS_H3K27ac_106070	0	0
HS_H3K27ac_106071	0.00610501	0
HS_H3K27ac_106072	0.00937115	0
HS_H3K27ac_106074	0.0141474	0
HS_H3K27ac_106075	0.0110497	0
HS_H3K27ac_106076	0.00429184	0
HS_H3K27ac_106077	0.0105634	0
HS_H3K27ac_106078	0.0171713	0
HS_H3K27ac_106079	0.0139202	0
HS_H3K27ac_10608	0.055106	0
HS_H3K27ac_106080	0.0127443	0
HS_H3K27ac_106082	0.0097032	0
HS_H3K27ac_106084	0.0113547	0
HS_H3K27ac_106085	0.0122592	0
HS_H3K27ac_106086	0.0129432	0
HS_H3K27ac_106088	0.0138597	0
HS_H3K27ac_106089	0.0140781	0
HS_H3K27ac_10609	0.0110656	0
HS_H3K27ac_106099	0.00707662	0
HS_H3K27ac_10610	0.0136813	0
HS_H3K27ac_106101	0.0161798	0
HS_H3K27ac_106102	0.00778996	0
HS_H3K27ac_106103	0.00622924	0
HS_H3K27ac_106104	0.00754954	0
HS_H3K27ac_106105	0.0136054	0
HS_H3K27ac_106106	0.0126888	0
HS_H3K27ac_106111	0.0146651	0
HS_H3K27ac_106112	0.00900515	0
HS_H3K27ac_106113	0.00857878	0
HS_H3K27ac_106114	0.00946892	0
HS_H3K27ac_106118	0.017219	0
HS_H3K27ac_106119	0.0129765	0
HS_H3K27ac_106120	0.0131072	0
HS_H3K27ac_106121	0.0165342	0
HS_H3K27ac_106122	0.0134315	0
HS_H3K27ac_106123	0.00714626	0
HS_H3K27ac_106127	0.00990991	0
HS_H3K27ac_106129	0	0
HS_H3K27ac_10613	0.0354139	0
HS_H3K27ac_106134	0.00870322	0
HS_H3K27ac_106137	0.00898551	0
HS_H3K27ac_106138	0.00659341	0
HS_H3K27ac_106142	0.00422833	0
HS_H3K27ac_106143	0.010989	0
HS_H3K27ac_106153	0.0166833	0
HS_H3K27ac_106156	0.0801773	0
HS_H3K27ac_106157	0.0870397	0
HS_H3K27ac_106158	0.0463872	0
HS_H3K27ac_106159	0.0102726	0
HS_H3K27ac_10616	0.0192998	0
HS_H3K27ac_106160	0.013245	0
HS_H3K27ac_106161	0.0141692	0
HS_H3K27ac_106162	0.0129754	0
HS_H3K27ac_106164	0.00817996	0
HS_H3K27ac_106166	0.0147352	0
HS_H3K27ac_106167	0.00764388	0
HS_H3K27ac_106168	0.00949504	0
HS_H3K27ac_106186	0.0160901	0
HS_H3K27ac_106189	0.0090009	0
HS_H3K27ac_10619	0.0154639	0
HS_H3K27ac_106190	0.00870362	0
HS_H3K27ac_106202	0.00883534	0
HS_H3K27ac_106203	0.00737005	0
HS_H3K27ac_106204	0.00863269	0
HS_H3K27ac_106206	0.0143049	0
HS_H3K27ac_106207	0.103627	0
HS_H3K27ac_106209	0.0104275	0
HS_H3K27ac_10621	0.0090625	0
HS_H3K27ac_106210	0.0129534	0
HS_H3K27ac_106214	0.0121112	0
HS_H3K27ac_106217	0.0145658	0
HS_H3K27ac_106218	0.0185349	0
HS_H3K27ac_106219	0.0148181	0
HS_H3K27ac_106220	0.0151771	0
HS_H3K27ac_106221	0.0133464	0
HS_H3K27ac_106225	0.00823224	0
HS_H3K27ac_106231	0.0156895	0
HS_H3K27ac_106232	0.00881834	0
HS_H3K27ac_106233	0.0125378	0
HS_H3K27ac_106234	0.0116836	0
HS_H3K27ac_106236	0.0121294	0
HS_H3K27ac_106237	0.012309	0
HS_H3K27ac_106238	0.0239362	0
HS_H3K27ac_106239	0.00714678	0
HS_H3K27ac_10624	0.0114667	0
HS_H3K27ac_106244	0.0161765	0
HS_H3K27ac_106245	0.0119944	0
HS_H3K27ac_106246	0.00476191	0
HS_H3K27ac_106249	0.128759	0
HS_H3K27ac_106250	0.00776359	0
HS_H3K27ac_106259	0.00676157	0
HS_H3K27ac_10626	0.00942476	0
HS_H3K27ac_106261	0.00696594	0
HS_H3K27ac_106262	0.0066681	0
HS_H3K27ac_106263	0.00885347	0
HS_H3K27ac_106271	0.00987876	0
HS_H3K27ac_106279	0.0149254	0
HS_H3K27ac_106280	0.0105913	0
HS_H3K27ac_106281	0.0100476	0
HS_H3K27ac_106287	0.00958557	0
HS_H3K27ac_106291	0.0146993	0
HS_H3K27ac_106293	0.0282609	0
HS_H3K27ac_106299	0.00597848	0
HS_H3K27ac_106301	0.014536	0
HS_H3K27ac_106302	0.0135846	0
HS_H3K27ac_106306	0.00611888	0
HS_H3K27ac_106307	0.00684524	0
HS_H3K27ac_106314	0.00495868	0
HS_H3K27ac_106315	0.0107878	0
HS_H3K27ac_106318	0.0120982	0
HS_H3K27ac_106319	0.00930233	0
HS_H3K27ac_106324	0.0135039	0
HS_H3K27ac_106325	0.00923239	0
HS_H3K27ac_106326	0.0102269	0
HS_H3K27ac_106327	0.00785995	0
HS_H3K27ac_106329	0.00963469	0
HS_H3K27ac_106330	0.00740418	0
HS_H3K27ac_106333	0.0108992	0
HS_H3K27ac_106335	0.0265577	0
HS_H3K27ac_106338	0.0106635	0
HS_H3K27ac_106340	0.0247253	0
HS_H3K27ac_106341	0.0234787	0
HS_H3K27ac_106342	0.00942623	0
HS_H3K27ac_106343	0.0115079	0
HS_H3K27ac_106344	0.00833611	0
HS_H3K27ac_106346	0.00801603	0
HS_H3K27ac_106348	0.00728332	0
HS_H3K27ac_106349	0.00901526	0
HS_H3K27ac_106350	0.0216607	0
HS_H3K27ac_106351	0.0148533	0
HS_H3K27ac_106352	0.00880134	0
HS_H3K27ac_106353	0.0136543	0
HS_H3K27ac_106354	0.0148472	0
HS_H3K27ac_106355	0.0127922	0
HS_H3K27ac_106356	0.0194833	0
HS_H3K27ac_106357	0.0111359	0
HS_H3K27ac_106358	0.0175213	0
HS_H3K27ac_106361	0.0124888	0
HS_H3K27ac_106363	0.0102724	0
HS_H3K27ac_106373	0.00950735	0
HS_H3K27ac_106374	0.00961137	0
HS_H3K27ac_106375	0.0121951	0
HS_H3K27ac_106376	0.0078329	0
HS_H3K27ac_106378	0.00860897	0
HS_H3K27ac_106379	0.0108275	0
HS_H3K27ac_106381	0.0116618	0
HS_H3K27ac_106382	0.0149254	0
HS_H3K27ac_106383	0.0186747	0
HS_H3K27ac_106387	0.0102389	0
HS_H3K27ac_106396	0.0109649	0
HS_H3K27ac_106397	0	0
HS_H3K27ac_106400	0.0073157	0
HS_H3K27ac_106416	0.0439856	0
[truncated: 36,180 more rows]

## Sheet: rhesus
CRE	subs_per_total	conservation_status
HS_H3K27ac_10000	0.0433468	0
HS_H3K27ac_10002	0.0417282	0
HS_H3K27ac_10003	0.0558891	0
HS_H3K27ac_10004	0.043763	0
HS_H3K27ac_10009	0.0490388	0
HS_H3K27ac_10010	0.0420048	0
HS_H3K27ac_10011	0.0469169	0
HS_H3K27ac_10012	0.0490463	0
HS_H3K27ac_10013	0.0527066	0
HS_H3K27ac_10014	0.0585652	0
HS_H3K27ac_10016	0.0698073	0
HS_H3K27ac_10017	0.0626881	0
HS_H3K27ac_10018	0.0545213	0
HS_H3K27ac_10019	0.0515518	0
HS_H3K27ac_10020	0.0521512	0
HS_H3K27ac_10021	0.117214	0
HS_H3K27ac_10022	0.035554	0
HS_H3K27ac_10023	0.0502183	0
HS_H3K27ac_100232	0.0604575	0
HS_H3K27ac_100233	0.0887546	0
HS_H3K27ac_10024	0.0704125	0
HS_H3K27ac_100241	0.0935961	0
HS_H3K27ac_100247	0.100465	0
HS_H3K27ac_100248	0.0867829	0
HS_H3K27ac_100251	0.105058	0
HS_H3K27ac_100252	0.0882267	0
HS_H3K27ac_10026	0.0339437	0
HS_H3K27ac_10027	0.0486876	0
HS_H3K27ac_100271	0.0858133	0
HS_H3K27ac_10028	0.0604059	0
HS_H3K27ac_10029	0.0722557	0
HS_H3K27ac_10030	0.0426143	0
HS_H3K27ac_10032	0.0551349	0
HS_H3K27ac_10034	0.0561404	0
HS_H3K27ac_100370	0.0881511	0
HS_H3K27ac_100374	0.089354	0
HS_H3K27ac_100377	0.0877863	0
HS_H3K27ac_100397	0.0343423	0
HS_H3K27ac_100400	0.0552995	0
HS_H3K27ac_10046	0.0734565	0
HS_H3K27ac_100461	0.131791	0
HS_H3K27ac_100462	0.0935862	0
HS_H3K27ac_100465	0.106383	0
HS_H3K27ac_100466	0.0899471	0
HS_H3K27ac_100467	0.0958374	0
HS_H3K27ac_10053	0.0684694	0
HS_H3K27ac_100549	0.0918851	0
HS_H3K27ac_100558	0.0902737	0
HS_H3K27ac_10056	0.0551905	0
HS_H3K27ac_100561	0.0824779	0
HS_H3K27ac_100563	0.12063	0
HS_H3K27ac_100565	0.0826934	0
HS_H3K27ac_100568	0.1	0
HS_H3K27ac_100570	0.0864046	0
HS_H3K27ac_10058	0.0401099	0
HS_H3K27ac_10060	0.0464174	0
HS_H3K27ac_10061	0.0516625	0
HS_H3K27ac_10063	0.0809568	0
HS_H3K27ac_10064	0.0520189	0
HS_H3K27ac_10065	0.0432617	0
HS_H3K27ac_10067	0.0467553	0
HS_H3K27ac_100676	0.105322	0
HS_H3K27ac_100677	0.0864082	0
HS_H3K27ac_100678	0.119014	0
HS_H3K27ac_10068	0.0493274	0
HS_H3K27ac_100680	0.0716946	0
HS_H3K27ac_100682	0.0733072	0
HS_H3K27ac_10069	0.0366972	0
HS_H3K27ac_100690	0.0610284	0
HS_H3K27ac_100691	0.0872642	0
HS_H3K27ac_100693	0.0468612	0
HS_H3K27ac_100694	0.0609712	0
HS_H3K27ac_100695	0.0686685	0
HS_H3K27ac_100698	0.0522388	0
HS_H3K27ac_10070	0.0544313	0
HS_H3K27ac_100704	0.0723527	0
HS_H3K27ac_100706	0.0672882	0
HS_H3K27ac_100707	0.0690647	0
HS_H3K27ac_100708	0.0620833	0
HS_H3K27ac_100709	0.0678571	0
HS_H3K27ac_100710	0.0648072	0
HS_H3K27ac_100711	0.0479062	0
HS_H3K27ac_100713	0.0419138	0
HS_H3K27ac_100715	0.066481	0
HS_H3K27ac_100718	0.0775552	0
HS_H3K27ac_100719	0.0597499	0
HS_H3K27ac_10072	0.03658	0
HS_H3K27ac_100720	0.0564872	0
HS_H3K27ac_100721	0.0578901	0
HS_H3K27ac_100724	0.0479421	0
HS_H3K27ac_100727	0.0346628	0
HS_H3K27ac_100728	0.0299468	0
HS_H3K27ac_100729	0.0492341	0
HS_H3K27ac_10073	0.0491803	0
HS_H3K27ac_10074	0.0343428	0
HS_H3K27ac_100741	0.0598232	0
HS_H3K27ac_100744	0.0627655	0
HS_H3K27ac_100745	0.0544323	0
HS_H3K27ac_10075	0.0717274	0
HS_H3K27ac_100750	0.0500611	0
HS_H3K27ac_100755	0.056381	0
HS_H3K27ac_10076	0.0419626	0
HS_H3K27ac_100761	0.0557507	0
HS_H3K27ac_100778	0.0532965	0
HS_H3K27ac_100779	0.0593575	0
HS_H3K27ac_100780	0.022534	0
HS_H3K27ac_100781	0.0619803	0
HS_H3K27ac_100782	0.0428034	0
HS_H3K27ac_100783	0.0577309	0
HS_H3K27ac_10079	0.0309654	0
HS_H3K27ac_1008	0.0436508	0
HS_H3K27ac_10080	0.0402509	0
HS_H3K27ac_100803	0.0489914	0
HS_H3K27ac_100804	0.0856772	0
HS_H3K27ac_10081	0.040036	0
HS_H3K27ac_100812	0.0500835	0
HS_H3K27ac_100813	0.0479127	0
HS_H3K27ac_10082	0.0496661	0
HS_H3K27ac_100820	0.0461912	0
HS_H3K27ac_100821	0.0486163	0
HS_H3K27ac_100822	0.0470693	0
HS_H3K27ac_100823	0.0345388	0
HS_H3K27ac_100824	0.0264874	0
HS_H3K27ac_100825	0.036902	0
HS_H3K27ac_100826	0.0570972	0
HS_H3K27ac_100828	0.0468571	0
HS_H3K27ac_100829	0.0492647	0
HS_H3K27ac_100831	0.0589971	0
HS_H3K27ac_100835	0.0643564	0
HS_H3K27ac_100836	0.0671347	0
HS_H3K27ac_100837	0.0510795	0
HS_H3K27ac_100838	0.0710855	0
HS_H3K27ac_100839	0.0634127	0
HS_H3K27ac_100842	0.0448573	0
HS_H3K27ac_100843	0.0562217	0
HS_H3K27ac_10085	0.0463499	0
HS_H3K27ac_10086	0.0442338	0
HS_H3K27ac_100862	0.0479723	0
HS_H3K27ac_100863	0.0630505	0
HS_H3K27ac_100864	0.0579003	0
HS_H3K27ac_100868	0.0773543	0
HS_H3K27ac_100869	0.0504612	0
HS_H3K27ac_10087	0.0374059	0
HS_H3K27ac_100870	0.0568475	0
HS_H3K27ac_100871	0.0583197	0
HS_H3K27ac_100873	0.0368098	1
HS_H3K27ac_100874	0.0419907	0
HS_H3K27ac_100875	0.044129	0
HS_H3K27ac_100876	0.0574163	0
HS_H3K27ac_100896	0.0471111	0
HS_H3K27ac_10090	0.0611664	0
HS_H3K27ac_100904	0.0668756	0
HS_H3K27ac_10091	0.0542276	0
HS_H3K27ac_100914	0.0754054	0
HS_H3K27ac_100916	0.07	0
HS_H3K27ac_100917	0.0540028	0
HS_H3K27ac_10092	0.0563957	0
HS_H3K27ac_100926	0.0686096	0
HS_H3K27ac_100927	0.0307487	0
HS_H3K27ac_100929	0.0659091	0
HS_H3K27ac_100930	0.0659432	0
HS_H3K27ac_100935	0.0685714	0
HS_H3K27ac_100937	0.0630123	0
HS_H3K27ac_100938	0.0654357	0
HS_H3K27ac_10094	0.0441908	0
HS_H3K27ac_100940	0.0562927	0
HS_H3K27ac_100941	0.0543165	0
HS_H3K27ac_100944	0.0613629	0
HS_H3K27ac_100946	0.0659051	0
HS_H3K27ac_100947	0.0569827	0
HS_H3K27ac_100948	0.0698808	0
HS_H3K27ac_100951	0.0775974	0
HS_H3K27ac_100952	0.0990308	1
HS_H3K27ac_100953	0.0774681	0
HS_H3K27ac_100954	0.0626973	0
HS_H3K27ac_100955	0.0695238	0
HS_H3K27ac_100956	0.0595568	0
HS_H3K27ac_100957	0.0560358	0
HS_H3K27ac_100958	0.0646724	0
HS_H3K27ac_100960	0.0680628	0
HS_H3K27ac_100962	0.0617381	0
HS_H3K27ac_100963	0.0498812	0
HS_H3K27ac_100964	0.0542582	0
HS_H3K27ac_100968	0.0782072	0
HS_H3K27ac_100970	0.0617672	0
HS_H3K27ac_100972	0.0558635	0
HS_H3K27ac_100981	0.0700322	0
HS_H3K27ac_100985	0.0554554	0
HS_H3K27ac_100986	0.0539419	0
HS_H3K27ac_100987	0.0588452	0
HS_H3K27ac_100989	0.0638876	0
HS_H3K27ac_100990	0.0513636	0
HS_H3K27ac_100992	0.068646	0
HS_H3K27ac_100994	0.0856327	0
HS_H3K27ac_100996	0.0604176	0
HS_H3K27ac_100998	0.0567071	0
HS_H3K27ac_10100	0.0458158	0
HS_H3K27ac_101007	0.0738155	0
HS_H3K27ac_101008	0.0615339	0
HS_H3K27ac_10101	0.0727878	0
HS_H3K27ac_101010	0.0530504	0
HS_H3K27ac_101011	0.0574919	0
HS_H3K27ac_101013	0.0640612	0
HS_H3K27ac_10102	0.0507614	0
HS_H3K27ac_101021	0.0710855	0
HS_H3K27ac_101022	0.0536013	0
HS_H3K27ac_101023	0.0656085	0
HS_H3K27ac_101024	0.0583839	0
HS_H3K27ac_101025	0.049714	0
HS_H3K27ac_101026	0.0569423	0
HS_H3K27ac_101029	0.0464286	0
HS_H3K27ac_10103	0.0733945	0
HS_H3K27ac_101033	0.0582586	0
HS_H3K27ac_101035	0.0641556	0
HS_H3K27ac_101037	0.0559763	0
HS_H3K27ac_101039	0.0621597	0
HS_H3K27ac_10104	0.0655303	0
HS_H3K27ac_101040	0.0668135	0
HS_H3K27ac_101041	0.0660036	0
HS_H3K27ac_10106	0.0747986	0
HS_H3K27ac_101060	0.0595238	0
HS_H3K27ac_10107	0.114433	0
HS_H3K27ac_10108	0.0422535	0
HS_H3K27ac_101084	0.0654628	0
HS_H3K27ac_101085	0.0717261	0
HS_H3K27ac_101086	0.0604027	0
HS_H3K27ac_101088	0.0569786	0
HS_H3K27ac_101089	0.0606996	0
HS_H3K27ac_101091	0.0565685	0
HS_H3K27ac_101092	0.0528634	0
HS_H3K27ac_101093	0.0567766	0
HS_H3K27ac_101094	0.0511073	0
HS_H3K27ac_101096	0.0663929	0
HS_H3K27ac_101097	0.0780943	0
HS_H3K27ac_101098	0.0383509	0
HS_H3K27ac_101111	0.0436557	0
HS_H3K27ac_101112	0.0452567	0
HS_H3K27ac_101113	0.0519815	0
HS_H3K27ac_101114	0.0534735	0
HS_H3K27ac_101115	0.0660879	0
HS_H3K27ac_101116	0.0627695	0
HS_H3K27ac_101117	0.0408732	0
HS_H3K27ac_101118	0.0628381	0
HS_H3K27ac_101119	0.060615	0
HS_H3K27ac_101122	0.0529557	0
HS_H3K27ac_101182	0.0811114	0
HS_H3K27ac_101235	0.0675752	0
HS_H3K27ac_101237	0.0638502	0
HS_H3K27ac_101240	0.0604881	0
HS_H3K27ac_101244	0.0493066	0
HS_H3K27ac_101247	0.0515727	0
HS_H3K27ac_101249	0.0693116	0
HS_H3K27ac_101252	0.0725516	0
HS_H3K27ac_101260	0.0676908	0
HS_H3K27ac_101261	0.0562278	0
HS_H3K27ac_101263	0.065102	0
HS_H3K27ac_101267	0.0612577	0
HS_H3K27ac_101269	0.0696798	0
HS_H3K27ac_101270	0.0824841	0
HS_H3K27ac_101272	0.0579399	0
HS_H3K27ac_101273	0.0692395	0
HS_H3K27ac_101274	0.0684444	0
HS_H3K27ac_101275	0.0625	0
HS_H3K27ac_101279	0.0729825	0
HS_H3K27ac_101281	0.0798809	0
HS_H3K27ac_101285	0.0786133	0
HS_H3K27ac_10130	0.0620259	0
HS_H3K27ac_101337	0.0684026	0
HS_H3K27ac_101339	0.0664526	0
HS_H3K27ac_10134	0.0752644	0
HS_H3K27ac_101341	0.0620716	0
HS_H3K27ac_101342	0.063006	0
HS_H3K27ac_101347	0.0682072	0
HS_H3K27ac_101348	0.0675241	0
HS_H3K27ac_101349	0.0821918	0
HS_H3K27ac_10135	0.0734463	0
HS_H3K27ac_101350	0.0789346	0
HS_H3K27ac_101351	0.0606417	0
HS_H3K27ac_101357	0.0571961	0
HS_H3K27ac_101359	0.0737218	0
HS_H3K27ac_101360	0.0692217	0
HS_H3K27ac_101365	0.067207	0
HS_H3K27ac_101367	0.0561131	0
HS_H3K27ac_101368	0.0659755	0
HS_H3K27ac_101369	0.0687343	0
HS_H3K27ac_101370	0.0642224	0
HS_H3K27ac_101372	0.0672868	0
HS_H3K27ac_101374	0.0664386	0
HS_H3K27ac_101376	0.0726719	0
HS_H3K27ac_101377	0.0638333	0
HS_H3K27ac_10138	0.0615942	0
HS_H3K27ac_101382	0.0625	0
HS_H3K27ac_101385	0.0549763	0
HS_H3K27ac_10139	0.0631651	0
HS_H3K27ac_10140	0.0641136	0
HS_H3K27ac_10142	0.084873	0
HS_H3K27ac_101422	0.0761421	0
HS_H3K27ac_101423	0.0717561	0
HS_H3K27ac_101427	0.142599	0
HS_H3K27ac_101432	0.0892755	0
HS_H3K27ac_101434	0.0690637	0
HS_H3K27ac_101436	0.0741544	0
HS_H3K27ac_101439	0.0776034	0
HS_H3K27ac_101442	0.0568627	0
HS_H3K27ac_101465	0.0825353	0
HS_H3K27ac_101466	0.0682609	0
HS_H3K27ac_101467	0.075859	0
HS_H3K27ac_10147	0.0729278	0
HS_H3K27ac_101473	0.0679178	0
HS_H3K27ac_101474	0.054185	0
HS_H3K27ac_101475	0.0676139	0
HS_H3K27ac_10149	0.0487883	0
HS_H3K27ac_101493	0.0803571	0
HS_H3K27ac_101496	0.0665491	0
HS_H3K27ac_101497	0.058032	0
HS_H3K27ac_101499	0.0590717	0
HS_H3K27ac_101500	0.0656353	0
HS_H3K27ac_10151	0.0579844	0
HS_H3K27ac_101519	0.0695444	0
HS_H3K27ac_10152	0.0659379	0
HS_H3K27ac_10153	0.0612025	0
HS_H3K27ac_10156	0.0669951	0
HS_H3K27ac_10157	0.0588235	0
HS_H3K27ac_10158	0.0568131	0
HS_H3K27ac_1016	0.0831343	0
HS_H3K27ac_101616	0.0562943	0
HS_H3K27ac_101617	0.0670927	0
HS_H3K27ac_101618	0.0656866	0
HS_H3K27ac_10163	0.0579255	0
HS_H3K27ac_10164	0.0646718	0
HS_H3K27ac_10165	0.0580425	0
HS_H3K27ac_10167	0.0645018	0
HS_H3K27ac_10168	0.0481283	0
HS_H3K27ac_10169	0.0598787	0
HS_H3K27ac_10171	0.0515183	0
HS_H3K27ac_101713	0.0655827	0
HS_H3K27ac_101715	0.0319039	0
HS_H3K27ac_101725	0.054763	0
HS_H3K27ac_101726	0.0732984	0
HS_H3K27ac_101727	0.0701897	0
HS_H3K27ac_101729	0.125964	0
HS_H3K27ac_101730	0.0731371	0
HS_H3K27ac_101731	0.0864989	0
HS_H3K27ac_101732	0.0722297	0
HS_H3K27ac_101733	0.0740741	0
HS_H3K27ac_101735	0.0808789	0
HS_H3K27ac_101736	0.0800781	0
HS_H3K27ac_101737	0.0588235	0
HS_H3K27ac_10174	0.057832	0
HS_H3K27ac_101742	0.0595138	0
HS_H3K27ac_101743	0.059126	0
HS_H3K27ac_101744	0.0624711	0
HS_H3K27ac_101745	0.0544766	0
HS_H3K27ac_101746	0.0564516	0
HS_H3K27ac_101747	0.0645161	0
HS_H3K27ac_101748	0.0545291	0
HS_H3K27ac_101749	0.0585125	0
HS_H3K27ac_101750	0.0646976	0
HS_H3K27ac_101753	0.0546265	0
HS_H3K27ac_101757	0.0238095	0
HS_H3K27ac_101758	0.0480669	0
HS_H3K27ac_101759	0.0904356	0
HS_H3K27ac_101760	0.065267	0
HS_H3K27ac_101761	0.0693694	0
HS_H3K27ac_101762	0.0568433	0
HS_H3K27ac_101763	0.0590048	0
HS_H3K27ac_101764	0.0747198	0
HS_H3K27ac_101768	0.0618893	0
HS_H3K27ac_101769	0.0625592	0
HS_H3K27ac_10177	0.0571939	0
HS_H3K27ac_101770	0.0591304	0
HS_H3K27ac_101782	0.0506329	0
HS_H3K27ac_101783	0.061762	0
HS_H3K27ac_101785	0.0602747	0
HS_H3K27ac_101787	0.0593566	0
HS_H3K27ac_101791	0.0692785	0
HS_H3K27ac_101792	0.0521092	0
HS_H3K27ac_101793	0.03918	0
HS_H3K27ac_101794	0.050173	0
HS_H3K27ac_101795	0.013986	0
HS_H3K27ac_101796	0.0679612	0
HS_H3K27ac_101797	0.0285714	0
HS_H3K27ac_101798	0.0602116	0
HS_H3K27ac_101799	0.0451703	0
HS_H3K27ac_101800	0.0514632	0
HS_H3K27ac_101804	0.0805518	0
HS_H3K27ac_101805	0.0582428	0
HS_H3K27ac_101806	0.0633952	0
HS_H3K27ac_101810	0.0667268	0
HS_H3K27ac_101811	0.0698096	0
HS_H3K27ac_101817	0.0550314	0
HS_H3K27ac_101818	0.060054	0
HS_H3K27ac_101819	0.0601611	0
HS_H3K27ac_101822	0.0287138	0
HS_H3K27ac_101823	0.038538	0
HS_H3K27ac_101824	0.0603754	0
HS_H3K27ac_101835	0.0742041	0
HS_H3K27ac_101836	0.0581506	0
HS_H3K27ac_101837	0.0643939	0
HS_H3K27ac_101838	0.0589187	0
HS_H3K27ac_101848	0.0468182	0
HS_H3K27ac_101849	0.0542636	0
HS_H3K27ac_101850	0.047619	1
HS_H3K27ac_101853	0.0755886	1
HS_H3K27ac_101854	0.0697168	0
HS_H3K27ac_101856	0.0754717	0
HS_H3K27ac_101858	0.0625289	0
HS_H3K27ac_101859	0.0407161	0
HS_H3K27ac_101864	0.0790707	0
HS_H3K27ac_101866	0.0598368	0
HS_H3K27ac_101867	0.0593373	0
HS_H3K27ac_101872	0.0234825	0
HS_H3K27ac_101873	0.0607966	1
HS_H3K27ac_101875	0.0593185	0
HS_H3K27ac_101876	0.0564366	0
HS_H3K27ac_101877	0.0496454	0
HS_H3K27ac_101878	0.0609907	0
HS_H3K27ac_101880	0.0505415	0
HS_H3K27ac_101881	0.0602606	0
HS_H3K27ac_101882	0.0327409	0
HS_H3K27ac_101883	0.0734118	0
HS_H3K27ac_101884	0.0529466	0
HS_H3K27ac_101888	0.0394883	0
HS_H3K27ac_101889	0.0674545	0
HS_H3K27ac_101890	0.0753695	0
HS_H3K27ac_101891	0.0618705	0
HS_H3K27ac_101892	0.0521713	0
HS_H3K27ac_101893	0.0582524	0
HS_H3K27ac_101897	0.042042	0
HS_H3K27ac_101901	0.0659609	0
HS_H3K27ac_101909	0.0540216	0
HS_H3K27ac_10191	0.0602094	0
HS_H3K27ac_101911	0.0895219	0
HS_H3K27ac_101913	0.0620347	0
HS_H3K27ac_101914	0.0771056	0
HS_H3K27ac_101915	0.0615681	0
HS_H3K27ac_101916	0.0317992	0
HS_H3K27ac_101919	0.0572501	0
HS_H3K27ac_101922	0.070229	0
HS_H3K27ac_101923	0.0782014	0
HS_H3K27ac_101924	0.0943601	0
HS_H3K27ac_101926	0.073246	0
HS_H3K27ac_101929	0.0673289	0
HS_H3K27ac_101932	0.0635008	0
HS_H3K27ac_101933	0.0591523	0
HS_H3K27ac_101934	0.0493023	0
HS_H3K27ac_101935	0.087963	0
HS_H3K27ac_101936	0.0685611	0
HS_H3K27ac_101937	0.0577722	0
HS_H3K27ac_101939	0.0725902	0
HS_H3K27ac_10194	0.063093	0
HS_H3K27ac_101940	0.0719587	0
HS_H3K27ac_101945	0.0592492	0
HS_H3K27ac_101947	0.0890851	0
HS_H3K27ac_101948	0.083254	0
HS_H3K27ac_101949	0.0747398	0
HS_H3K27ac_10196	0.0614162	0
HS_H3K27ac_101962	0.0629655	0
HS_H3K27ac_101963	0.0619835	0
HS_H3K27ac_10197	0.0606401	0
HS_H3K27ac_101976	0.0701058	0
HS_H3K27ac_101977	0.0577336	0
HS_H3K27ac_10198	0.0614367	0
HS_H3K27ac_10199	0.0620793	0
HS_H3K27ac_102000	0.0885714	0
HS_H3K27ac_102001	0.0681044	0
HS_H3K27ac_102004	0.0366057	0
HS_H3K27ac_10201	0.0680729	0
HS_H3K27ac_102012	0.0572082	0
HS_H3K27ac_102013	0.0436317	0
HS_H3K27ac_102014	0.0421438	0
HS_H3K27ac_102015	0.0691288	0
HS_H3K27ac_102016	0.070133	0
HS_H3K27ac_102019	0.0382452	0
HS_H3K27ac_102027	0.0520776	0
HS_H3K27ac_102028	0.0588789	0
HS_H3K27ac_102035	0.0588079	0
HS_H3K27ac_102036	0.0668591	0
HS_H3K27ac_102038	0.064438	0
HS_H3K27ac_102039	0.0640314	0
HS_H3K27ac_102041	0.0400911	0
HS_H3K27ac_102042	0.0534521	0
HS_H3K27ac_102043	0.0644444	0
HS_H3K27ac_102044	0.050728	0
HS_H3K27ac_102045	0.0695334	1
HS_H3K27ac_102046	0.061215	0
HS_H3K27ac_102047	0.0456172	0
HS_H3K27ac_102048	0.052901	0
HS_H3K27ac_102049	0.0631761	0
HS_H3K27ac_10206	0.0370185	0
HS_H3K27ac_102063	0.0696517	0
HS_H3K27ac_10207	0.0495963	0
HS_H3K27ac_102071	0.0541958	0
HS_H3K27ac_102072	0.0641248	0
HS_H3K27ac_102073	0.0617688	0
HS_H3K27ac_102074	0.0625592	0
HS_H3K27ac_102075	0.0749516	0
HS_H3K27ac_102076	0.0532765	0
HS_H3K27ac_102077	0.0620484	0
HS_H3K27ac_102078	0.0564663	0
HS_H3K27ac_10208	0.0474739	0
HS_H3K27ac_102080	0.0747508	0
HS_H3K27ac_102081	0.0499658	0
HS_H3K27ac_102082	0.073354	0
HS_H3K27ac_102083	0.0469826	0
HS_H3K27ac_102084	0.046332	0
HS_H3K27ac_102085	0.0470285	0
HS_H3K27ac_102087	0.061849	0
HS_H3K27ac_102089	0.0482143	0
HS_H3K27ac_10209	0.0461589	0
HS_H3K27ac_102099	0.0516194	0
HS_H3K27ac_102104	0.0506272	0
HS_H3K27ac_102108	0.0503356	0
HS_H3K27ac_10211	0.044157	0
HS_H3K27ac_102115	0.0613443	0
HS_H3K27ac_102118	0.0569853	0
HS_H3K27ac_102119	0.0680101	0
HS_H3K27ac_10212	0.0440075	0
HS_H3K27ac_102122	0.0561404	0
HS_H3K27ac_102123	0.0511304	0
HS_H3K27ac_102126	0.0551396	0
HS_H3K27ac_102127	0.0512897	0
HS_H3K27ac_102128	0.0539894	0
HS_H3K27ac_10213	0.0484623	0
HS_H3K27ac_102132	0.0673913	0
HS_H3K27ac_102133	0.0524375	0
HS_H3K27ac_102135	0.0651141	0
HS_H3K27ac_102136	0.0688332	0
HS_H3K27ac_10214	0.0699552	0
HS_H3K27ac_102141	0.0682451	0
HS_H3K27ac_102142	0.0422297	0
HS_H3K27ac_102143	0.0670487	0
HS_H3K27ac_102144	0.0597661	0
HS_H3K27ac_102145	0.0716593	0
HS_H3K27ac_10215	0.0550373	0
HS_H3K27ac_102159	0.0654923	0
HS_H3K27ac_10216	0.048291	0
HS_H3K27ac_102160	0.0618467	0
HS_H3K27ac_102161	0.0560462	0
HS_H3K27ac_102164	0.0564395	0
HS_H3K27ac_102166	0.0595383	0
HS_H3K27ac_102168	0.0728041	0
HS_H3K27ac_102169	0.0644778	0
HS_H3K27ac_10217	0.0599251	0
HS_H3K27ac_102170	0.0732839	0
HS_H3K27ac_102171	0.0648727	0
HS_H3K27ac_102172	0.0697098	0
HS_H3K27ac_102174	0.0606215	0
HS_H3K27ac_102175	0.0555303	0
HS_H3K27ac_102176	0.0555556	0
HS_H3K27ac_102177	0.0536723	0
HS_H3K27ac_10218	0.027137	0
HS_H3K27ac_102187	0.0565771	0
HS_H3K27ac_102189	0.0703408	0
HS_H3K27ac_10219	0.0536723	0
HS_H3K27ac_102190	0.0472727	0
HS_H3K27ac_102191	0.0484461	0
HS_H3K27ac_102192	0.0537467	0
HS_H3K27ac_102194	0.0540754	0
HS_H3K27ac_102195	0.0502063	0
HS_H3K27ac_102197	0.0558485	0
HS_H3K27ac_10220	0.050694	0
HS_H3K27ac_102200	0.0512992	0
HS_H3K27ac_102205	0.0472727	0
HS_H3K27ac_102207	0.0621218	0
HS_H3K27ac_102208	0.0607815	0
HS_H3K27ac_102209	0.0426863	0
HS_H3K27ac_102214	0.0988687	0
HS_H3K27ac_102215	0.0543699	0
HS_H3K27ac_102217	0.0497836	0
HS_H3K27ac_102219	0.066487	0
HS_H3K27ac_102221	0.0639417	0
HS_H3K27ac_102227	0.0504967	0
HS_H3K27ac_102228	0.0538244	1
HS_H3K27ac_102229	0.0748106	0
HS_H3K27ac_102230	0.0497618	0
HS_H3K27ac_102231	0.0447761	0
HS_H3K27ac_102235	0.048913	0
HS_H3K27ac_10224	0.055788	0
HS_H3K27ac_10225	0.0649106	0
HS_H3K27ac_102252	0.0571349	0
HS_H3K27ac_10226	0.0496769	0
HS_H3K27ac_10227	0.0638298	0
HS_H3K27ac_102276	0.0620752	0
HS_H3K27ac_10228	0.0378261	0
HS_H3K27ac_102287	0.0602753	0
HS_H3K27ac_102288	0.0584879	0
HS_H3K27ac_102289	0.0645955	0
HS_H3K27ac_10229	0.0855397	0
HS_H3K27ac_102291	0.065445	0
HS_H3K27ac_102292	0.0673392	0
HS_H3K27ac_102293	0.0676048	0
HS_H3K27ac_102295	0.0564014	0
HS_H3K27ac_102299	0.0589539	0
HS_H3K27ac_10230	0.0609888	0
HS_H3K27ac_102300	0.0708889	0
HS_H3K27ac_102304	0.0602767	0
HS_H3K27ac_102305	0.0531309	0
HS_H3K27ac_102306	0.0620027	0
HS_H3K27ac_102307	0.0569961	0
HS_H3K27ac_102309	0.0498385	0
HS_H3K27ac_10231	0.0669377	0
HS_H3K27ac_102310	0.0484302	0
HS_H3K27ac_102311	0.0599229	0
HS_H3K27ac_102312	0.0580426	0
HS_H3K27ac_10232	0.0661217	0
HS_H3K27ac_102340	0.0642823	0
HS_H3K27ac_102341	0.0490722	0
HS_H3K27ac_102342	0.0493984	0
HS_H3K27ac_102364	0.0578111	0
HS_H3K27ac_102365	0.0625	0
HS_H3K27ac_102382	0.0367893	0
HS_H3K27ac_102384	0.0605727	0
HS_H3K27ac_102385	0.0654206	0
HS_H3K27ac_102386	0.0541082	0
HS_H3K27ac_102387	0.0771089	0
HS_H3K27ac_102391	0.0830986	0
HS_H3K27ac_102392	0.0726496	0
HS_H3K27ac_102393	0.0787059	0
HS_H3K27ac_102398	0.0274938	0
HS_H3K27ac_102408	0.0787349	0
HS_H3K27ac_102417	0.0620592	0
HS_H3K27ac_102418	0.0571429	0
HS_H3K27ac_102420	0.054436	0
HS_H3K27ac_102422	0.0575787	0
HS_H3K27ac_102427	0.0468498	0
HS_H3K27ac_102431	0.05	0
HS_H3K27ac_102432	0.0549954	0
HS_H3K27ac_102435	0.0580184	0
HS_H3K27ac_102436	0.0495546	0
HS_H3K27ac_102437	0.0813953	0
HS_H3K27ac_102462	0.060162	0
HS_H3K27ac_102468	0.0549451	0
HS_H3K27ac_102469	0.0478851	0
HS_H3K27ac_102470	0.0519878	0
HS_H3K27ac_102471	0.070283	0
HS_H3K27ac_102473	0.0573457	0
HS_H3K27ac_102476	0.0711652	0
HS_H3K27ac_102478	0.0729528	0
HS_H3K27ac_10248	0.0649588	0
HS_H3K27ac_102488	0.0699734	0
HS_H3K27ac_102489	0.045773	0
HS_H3K27ac_10249	0.0705492	0
HS_H3K27ac_102490	0.0865103	0
HS_H3K27ac_102491	0.0627063	0
HS_H3K27ac_102492	0.0569142	0
HS_H3K27ac_102493	0.080855	0
HS_H3K27ac_102495	0.0594662	0
HS_H3K27ac_102497	0.0544928	0
HS_H3K27ac_102499	0.0750583	0
HS_H3K27ac_102500	0.0590537	0
HS_H3K27ac_102501	0.053027	0
HS_H3K27ac_102502	0.0539059	0
HS_H3K27ac_102503	0.0613932	0
HS_H3K27ac_102506	0.0477879	0
HS_H3K27ac_102508	0.0661494	0
HS_H3K27ac_102509	0.074187	0
HS_H3K27ac_102511	0.0510397	0
HS_H3K27ac_102514	0.0683425	0
HS_H3K27ac_102516	0.0655785	0
HS_H3K27ac_102518	0.0758427	0
HS_H3K27ac_102519	0.069366	0
HS_H3K27ac_102521	0.063279	0
HS_H3K27ac_102522	0.0681526	0
HS_H3K27ac_102523	0.0721187	0
HS_H3K27ac_102525	0.0683163	0
HS_H3K27ac_102527	0.074846	0
HS_H3K27ac_102528	0.0748363	0
HS_H3K27ac_102529	0.0691299	0
HS_H3K27ac_102531	0.055814	0
HS_H3K27ac_102532	0.0774507	0
HS_H3K27ac_102544	0.0497382	0
HS_H3K27ac_102545	0.0661097	0
HS_H3K27ac_102546	0.0638909	0
HS_H3K27ac_102550	0.0666667	0
HS_H3K27ac_102551	0.0536976	0
HS_H3K27ac_102552	0.0570529	0
HS_H3K27ac_102553	0.0556561	0
HS_H3K27ac_102554	0.0489148	0
HS_H3K27ac_102556	0.0525448	0
HS_H3K27ac_102557	0.0542763	0
HS_H3K27ac_102558	0.051393	0
HS_H3K27ac_102560	0.0547355	0
HS_H3K27ac_102562	0.0568067	0
HS_H3K27ac_102564	0.0634654	0
HS_H3K27ac_10257	0.0668473	0
HS_H3K27ac_102572	0.0714953	0
HS_H3K27ac_102575	0.0565276	0
HS_H3K27ac_102577	0.0787603	0
HS_H3K27ac_10258	0.0432659	0
HS_H3K27ac_102580	0.0763324	0
HS_H3K27ac_102581	0.0709393	0
HS_H3K27ac_102582	0.0364963	0
HS_H3K27ac_102583	0.0747223	0
HS_H3K27ac_102585	0.0701419	0
HS_H3K27ac_102588	0.0651668	0
HS_H3K27ac_102589	0.0670732	0
HS_H3K27ac_10259	0.0592448	0
HS_H3K27ac_102593	0.0658094	0
HS_H3K27ac_102597	0.064702	0
HS_H3K27ac_1026	0.090587	0
HS_H3K27ac_102600	0.0738661	0
HS_H3K27ac_102602	0.0804911	0
HS_H3K27ac_102603	0.0287474	0
HS_H3K27ac_102604	0.067757	0
HS_H3K27ac_10261	0.0271125	0
HS_H3K27ac_102612	0.0626797	0
HS_H3K27ac_102615	0.0645604	0
HS_H3K27ac_102616	0.0661827	0
HS_H3K27ac_10262	0.0518973	0
HS_H3K27ac_102623	0.0668182	0
HS_H3K27ac_102629	0.0618971	0
HS_H3K27ac_10263	0.0673033	0
HS_H3K27ac_102632	0.0632872	0
HS_H3K27ac_102634	0.0663034	0
HS_H3K27ac_102635	0.0697198	0
HS_H3K27ac_102638	0.0726756	0
HS_H3K27ac_102639	0.0600185	0
HS_H3K27ac_10264	0.0640939	0
HS_H3K27ac_102640	0.0467626	0
HS_H3K27ac_102647	0.0535188	0
HS_H3K27ac_10266	0.069386	0
HS_H3K27ac_102662	0.0571429	0
HS_H3K27ac_10267	0.0655665	0
HS_H3K27ac_10268	0.0458015	0
HS_H3K27ac_10269	0.0472133	0
HS_H3K27ac_102691	0.0728571	0
HS_H3K27ac_102692	0.0635903	0
HS_H3K27ac_102696	0.061349	0
HS_H3K27ac_10270	0.0540172	0
HS_H3K27ac_102701	0.0549356	0
HS_H3K27ac_102706	0.0417385	0
HS_H3K27ac_10271	0.0621059	0
HS_H3K27ac_102714	0.0485024	0
HS_H3K27ac_102717	0.0437923	0
HS_H3K27ac_102718	0.0947631	0
HS_H3K27ac_102728	0.0416667	0
HS_H3K27ac_102730	0.0726559	0
HS_H3K27ac_102731	0.0642662	0
HS_H3K27ac_102732	0.055325	0
HS_H3K27ac_10274	0.058364	0
HS_H3K27ac_102746	0.0559507	0
HS_H3K27ac_102747	0.0595626	0
HS_H3K27ac_102758	0.0729013	0
HS_H3K27ac_102760	0.0718974	0
HS_H3K27ac_102762	0.0392943	0
HS_H3K27ac_102763	0.0377537	0
HS_H3K27ac_102764	0.0685663	0
HS_H3K27ac_102766	0.0455442	0
HS_H3K27ac_102770	0.0489013	0
HS_H3K27ac_102772	0.0639747	0
HS_H3K27ac_102775	0.0800439	0
HS_H3K27ac_102785	0.0512096	0
HS_H3K27ac_10280	0.0759124	0
HS_H3K27ac_102802	0.0470541	0
HS_H3K27ac_10281	0.0627262	0
HS_H3K27ac_102817	0.0533458	0
HS_H3K27ac_102818	0.0707672	0
HS_H3K27ac_102819	0.0634812	0
HS_H3K27ac_10282	0.031015	0
HS_H3K27ac_10283	0.0129349	0
HS_H3K27ac_102836	0.0691164	0
HS_H3K27ac_102837	0.0602467	0
HS_H3K27ac_102838	0.0572687	0
HS_H3K27ac_102839	0.0598179	0
HS_H3K27ac_10284	0.0651488	0
HS_H3K27ac_102840	0.0605343	0
HS_H3K27ac_102842	0.0645924	0
HS_H3K27ac_102843	0.050565	0
HS_H3K27ac_102854	0.057513	0
HS_H3K27ac_102860	0.0567108	0
HS_H3K27ac_102862	0.0521232	0
HS_H3K27ac_10287	0.0703911	0
HS_H3K27ac_102872	0.0529666	0
HS_H3K27ac_102875	0.0595846	0
HS_H3K27ac_102882	0.0759717	0
HS_H3K27ac_102883	0.0733333	0
HS_H3K27ac_102884	0.0552927	0
HS_H3K27ac_102886	0.0627958	0
HS_H3K27ac_10289	0.0643308	0
HS_H3K27ac_102905	0.0619446	0
HS_H3K27ac_10291	0.0749653	0
HS_H3K27ac_102910	0.048726	0
HS_H3K27ac_102911	0.0704225	0
HS_H3K27ac_102914	0.091053	0
HS_H3K27ac_102917	0.0515464	0
HS_H3K27ac_102919	0.0642063	0
HS_H3K27ac_10292	0.0665375	0
HS_H3K27ac_102920	0.0617608	0
HS_H3K27ac_102925	0.0622301	0
HS_H3K27ac_102926	0.0633072	0
HS_H3K27ac_102929	0.0469613	1
HS_H3K27ac_10293	0.06188	0
HS_H3K27ac_102930	0.056939	0
HS_H3K27ac_102933	0.0985678	0
HS_H3K27ac_102934	0.030504	0
HS_H3K27ac_102937	0.0631359	0
HS_H3K27ac_102939	0.0365854	0
HS_H3K27ac_10294	0.065754	0
HS_H3K27ac_102940	0.0418883	0
HS_H3K27ac_102944	0.039185	0
HS_H3K27ac_102945	0.0564731	0
HS_H3K27ac_102947	0.0381643	0
HS_H3K27ac_102949	0.036546	0
HS_H3K27ac_102951	0.039391	0
HS_H3K27ac_102954	0.0491132	0
HS_H3K27ac_102958	0.0515531	0
HS_H3K27ac_102963	0.039531	0
HS_H3K27ac_102965	0.052755	0
HS_H3K27ac_102966	0.0396201	0
HS_H3K27ac_102969	0.046729	0
HS_H3K27ac_102971	0.0754656	0
HS_H3K27ac_102973	0.0483351	0
HS_H3K27ac_102974	0.0644068	0
HS_H3K27ac_10299	0.0607044	0
HS_H3K27ac_103012	0.0602299	0
HS_H3K27ac_103013	0.0537052	0
HS_H3K27ac_103014	0.0507975	0
HS_H3K27ac_103016	0.0539799	0
HS_H3K27ac_103017	0.03517	0
HS_H3K27ac_103023	0.0429692	0
HS_H3K27ac_103034	0.0504188	0
HS_H3K27ac_103044	0.0598066	0
HS_H3K27ac_103051	0.0479138	0
HS_H3K27ac_103055	0.0313152	0
HS_H3K27ac_103057	0.0677537	0
HS_H3K27ac_103058	0.0599201	0
HS_H3K27ac_103059	0.0870032	1
HS_H3K27ac_103060	0.0457542	0
HS_H3K27ac_103067	0.054635	0
HS_H3K27ac_103068	0.0477928	0
HS_H3K27ac_103069	0.0297794	0
HS_H3K27ac_10307	0.0546075	0
HS_H3K27ac_103070	0.0320233	0
HS_H3K27ac_103071	0.0493421	0
HS_H3K27ac_103072	0.0382208	0
HS_H3K27ac_103073	0.0463775	0
HS_H3K27ac_103076	0.0639386	0
HS_H3K27ac_103077	0.0523633	0
HS_H3K27ac_103078	0.0598935	0
HS_H3K27ac_103079	0.0412968	0
HS_H3K27ac_10308	0.0578463	0
HS_H3K27ac_103081	0.0548198	0
HS_H3K27ac_103084	0.0637899	0
HS_H3K27ac_103085	0.0487805	0
HS_H3K27ac_10310	0.0582862	0
HS_H3K27ac_10311	0.0843537	0
HS_H3K27ac_103116	0.0533243	0
HS_H3K27ac_10312	0.0578016	0
HS_H3K27ac_103122	0.0603675	0
HS_H3K27ac_103123	0.0535869	0
HS_H3K27ac_103130	0.0699569	0
HS_H3K27ac_103131	0.0553657	0
HS_H3K27ac_103134	0.0567989	0
HS_H3K27ac_103138	0.0490638	0
HS_H3K27ac_10314	0.068712	0
HS_H3K27ac_103147	0.0630372	0
HS_H3K27ac_103148	0.0538725	0
HS_H3K27ac_103153	0.0446349	0
HS_H3K27ac_103155	0.0611753	0
HS_H3K27ac_103156	0.0550645	0
HS_H3K27ac_103159	0.0641267	0
HS_H3K27ac_10316	0.0683165	0
HS_H3K27ac_103160	0.038695	0
HS_H3K27ac_103161	0.0452521	0
HS_H3K27ac_103162	0.0451829	0
HS_H3K27ac_103165	0.0492512	0
HS_H3K27ac_103166	0.0438585	0
HS_H3K27ac_103172	0.0485393	0
HS_H3K27ac_103173	0.0572143	0
HS_H3K27ac_103178	0.0573734	0
HS_H3K27ac_103179	0.0574211	0
HS_H3K27ac_10318	0.0659767	0
HS_H3K27ac_103181	0.0449123	0
HS_H3K27ac_103183	0.0525021	0
HS_H3K27ac_103185	0.048549	0
HS_H3K27ac_103187	0.066477	0
HS_H3K27ac_10319	0.0730115	0
HS_H3K27ac_103190	0.0548982	0
HS_H3K27ac_103191	0.0650869	0
HS_H3K27ac_103193	0.0582707	0
HS_H3K27ac_103194	0.0644872	0
HS_H3K27ac_103195	0.0756838	0
HS_H3K27ac_103196	0.0645624	0
HS_H3K27ac_103197	0.0541734	0
HS_H3K27ac_103200	0.0626062	0
HS_H3K27ac_103202	0.0628384	0
HS_H3K27ac_103206	0.0551774	0
HS_H3K27ac_103208	0.064569	0
HS_H3K27ac_10321	0.0534045	0
HS_H3K27ac_103213	0.0552673	0
HS_H3K27ac_103216	0.0710706	0
HS_H3K27ac_103217	0.0574163	0
HS_H3K27ac_103218	0.066888	0
HS_H3K27ac_103219	0.0586792	0
HS_H3K27ac_10322	0.0662622	0
HS_H3K27ac_103221	0.0510982	0
HS_H3K27ac_103222	0.0635481	0
HS_H3K27ac_103223	0.0641386	0
HS_H3K27ac_103225	0.073928	0
HS_H3K27ac_103226	0.0695306	0
HS_H3K27ac_103227	0.0491958	0
HS_H3K27ac_103228	0.0605925	0
HS_H3K27ac_103229	0.0597914	0
HS_H3K27ac_10323	0.068564	1
HS_H3K27ac_103232	0.0663529	0
HS_H3K27ac_103233	0.0532213	0
HS_H3K27ac_103234	0.0539553	0
HS_H3K27ac_103238	0.064977	0
HS_H3K27ac_103239	0.0690226	0
HS_H3K27ac_10324	0.0579531	0
HS_H3K27ac_103242	0.0695489	0
HS_H3K27ac_103243	0.0700403	0
HS_H3K27ac_103245	0.0564054	0
HS_H3K27ac_103246	0.0734333	0
HS_H3K27ac_103248	0.0641786	0
HS_H3K27ac_10325	0.0751949	0
HS_H3K27ac_103250	0.0545685	0
HS_H3K27ac_103251	0.0657521	0
HS_H3K27ac_103252	0.0645023	0
HS_H3K27ac_103253	0.067271	0
HS_H3K27ac_103254	0.0662706	0
HS_H3K27ac_103255	0.0580599	0
HS_H3K27ac_103257	0.0575411	0
HS_H3K27ac_10326	0.0711793	0
HS_H3K27ac_103261	0.0608475	0
HS_H3K27ac_103262	0.0582624	0
HS_H3K27ac_103264	0.062264	0
HS_H3K27ac_10327	0.0539664	0
HS_H3K27ac_103272	0.0621863	0
HS_H3K27ac_103276	0.053083	0
HS_H3K27ac_103277	0.0537919	0
HS_H3K27ac_103278	0.05582	0
HS_H3K27ac_103279	0.0564292	0
HS_H3K27ac_103280	0.061049	0
HS_H3K27ac_103282	0.0588235	0
HS_H3K27ac_10329	0.0545187	0
HS_H3K27ac_103290	0.01875	0
HS_H3K27ac_103291	0.0568089	0
HS_H3K27ac_103292	0.0411562	0
HS_H3K27ac_103293	0.0573422	0
HS_H3K27ac_103294	0.0661846	0
HS_H3K27ac_10330	0.0645161	0
HS_H3K27ac_103300	0.0538336	0
HS_H3K27ac_103301	0.0281948	0
HS_H3K27ac_103302	0.0492001	0
HS_H3K27ac_103305	0.0551707	0
HS_H3K27ac_103308	0.0518387	0
HS_H3K27ac_103309	0.0494671	0
HS_H3K27ac_10331	0.047266	0
HS_H3K27ac_103311	0.0526056	0
HS_H3K27ac_103314	0.0716753	0
HS_H3K27ac_103315	0.0548387	0
HS_H3K27ac_103316	0.0542473	0
HS_H3K27ac_103317	0.0519313	0
HS_H3K27ac_103318	0.0622549	0
HS_H3K27ac_103319	0.0414924	0
HS_H3K27ac_10332	0.0655431	0
HS_H3K27ac_103327	0.0524809	1
HS_H3K27ac_103339	0.0375796	0
HS_H3K27ac_103345	0.0424354	0
HS_H3K27ac_103347	0.0594045	0
HS_H3K27ac_10335	0.0659391	0
HS_H3K27ac_103355	0.0512937	0
HS_H3K27ac_103359	0.0682019	1
HS_H3K27ac_10336	0.0689493	0
HS_H3K27ac_103360	0.101382	0
HS_H3K27ac_103361	0.0717614	0
HS_H3K27ac_103362	0.0660532	0
HS_H3K27ac_103363	0.0701754	0
HS_H3K27ac_103364	0.0719376	0
HS_H3K27ac_103365	0.0609756	0
HS_H3K27ac_103368	0.0494918	0
HS_H3K27ac_103369	0.0668044	0
HS_H3K27ac_10337	0.0558214	0
HS_H3K27ac_103370	0.0510689	0
HS_H3K27ac_103371	0.0625	0
HS_H3K27ac_103373	0.0621341	0
HS_H3K27ac_103375	0.0592915	0
HS_H3K27ac_103381	0.0644903	0
HS_H3K27ac_10339	0.0577293	0
HS_H3K27ac_103390	0.0617284	0
HS_H3K27ac_103391	0.0567427	0
HS_H3K27ac_103395	0.0773667	0
HS_H3K27ac_103396	0.056423	0
HS_H3K27ac_103397	0.057423	0
HS_H3K27ac_103398	0.056731	0
HS_H3K27ac_103400	0.0520258	0
HS_H3K27ac_103401	0.0522845	0
HS_H3K27ac_103402	0.0522504	0
HS_H3K27ac_103403	0.0600185	0
HS_H3K27ac_103405	0.0606752	0
HS_H3K27ac_103406	0.0817916	0
HS_H3K27ac_103407	0.063502	0
HS_H3K27ac_103409	0.0668775	0
HS_H3K27ac_10341	0.0698459	0
HS_H3K27ac_103410	0.0596699	0
HS_H3K27ac_103411	0.0568627	0
HS_H3K27ac_103412	0.074184	0
HS_H3K27ac_103413	0.0713997	0
HS_H3K27ac_103418	0.0687261	0
HS_H3K27ac_10342	0.0630849	0
HS_H3K27ac_103424	0.0642891	0
HS_H3K27ac_103425	0.0596413	0
HS_H3K27ac_103426	0.0489906	0
HS_H3K27ac_103428	0.114823	0
HS_H3K27ac_103433	0.0594731	0
HS_H3K27ac_103442	0.0859808	0
HS_H3K27ac_103444	0.0613009	0
HS_H3K27ac_103445	0.0853485	0
HS_H3K27ac_103446	0.0538729	0
HS_H3K27ac_103447	0.067731	0
HS_H3K27ac_103448	0.0635505	0
HS_H3K27ac_103452	0.0606899	0
HS_H3K27ac_103456	0.0646242	0
HS_H3K27ac_103457	0.0492187	0
HS_H3K27ac_103458	0.0739927	0
HS_H3K27ac_10346	0.0694324	0
HS_H3K27ac_103460	0.0661179	0
HS_H3K27ac_103463	0.0655571	0
HS_H3K27ac_103465	0.0646131	0
HS_H3K27ac_10347	0.0622996	0
HS_H3K27ac_103470	0.0698864	0
HS_H3K27ac_103472	0.0618705	0
HS_H3K27ac_103473	0.0575522	0
HS_H3K27ac_10348	0.0502283	0
HS_H3K27ac_103484	0.075762	0
HS_H3K27ac_103486	0.0610909	0
HS_H3K27ac_103488	0.0522353	0
HS_H3K27ac_103489	0.0632737	0
HS_H3K27ac_10349	0.0705882	0
HS_H3K27ac_103490	0.0572607	0
HS_H3K27ac_103491	0.0576341	0
HS_H3K27ac_103495	0.0658456	0
HS_H3K27ac_103496	0.0685684	0
HS_H3K27ac_103499	0.0650862	0
HS_H3K27ac_103500	0.0635118	0
HS_H3K27ac_103501	0.052313	0
HS_H3K27ac_103502	0.0509723	0
HS_H3K27ac_103505	0.0607193	0
HS_H3K27ac_103506	0.052436	0
HS_H3K27ac_103531	0.0551191	0
HS_H3K27ac_103536	0.0794791	0
HS_H3K27ac_103537	0.0640613	0
HS_H3K27ac_103539	0.0440694	0
HS_H3K27ac_103540	0.0574011	0
HS_H3K27ac_103557	0.056486	0
HS_H3K27ac_10356	0.068662	0
HS_H3K27ac_10357	0.0417515	0
HS_H3K27ac_103574	0.0416846	0
HS_H3K27ac_103575	0.0181241	0
HS_H3K27ac_103576	0.0657586	0
HS_H3K27ac_103578	0.0567477	0
HS_H3K27ac_103579	0.0592236	0
HS_H3K27ac_10358	0.0486111	0
HS_H3K27ac_103580	0.0602871	0
HS_H3K27ac_103583	0.0629806	0
HS_H3K27ac_103584	0.0602178	0
HS_H3K27ac_103586	0.0627964	0
HS_H3K27ac_103589	0.0618975	0
HS_H3K27ac_103590	0.0492687	0
HS_H3K27ac_103591	0.0512157	0
HS_H3K27ac_103609	0.045961	0
HS_H3K27ac_103614	0.0637272	0
HS_H3K27ac_103617	0.0821142	0
HS_H3K27ac_103633	0.05396	0
HS_H3K27ac_103634	0.0641093	0
HS_H3K27ac_103635	0.0618605	0
HS_H3K27ac_103636	0.0516432	0
HS_H3K27ac_103637	0.0598608	0
HS_H3K27ac_103638	0.0633084	0
HS_H3K27ac_103639	0.0700204	0
HS_H3K27ac_103641	0.0542341	0
HS_H3K27ac_103642	0.0657534	0
HS_H3K27ac_103643	0.0625268	0
HS_H3K27ac_103644	0.0608056	0
HS_H3K27ac_103648	0.0603203	0
HS_H3K27ac_103654	0.0575021	0
HS_H3K27ac_103656	0.0666943	0
HS_H3K27ac_103657	0.0635199	0
HS_H3K27ac_103660	0.0673794	0
HS_H3K27ac_103663	0.0419753	0
HS_H3K27ac_103666	0.0533708	0
HS_H3K27ac_103667	0.058299	0
HS_H3K27ac_103669	0.0555099	0
HS_H3K27ac_103670	0.0658287	0
HS_H3K27ac_103673	0.0756164	0
HS_H3K27ac_103674	0.0697115	0
HS_H3K27ac_103677	0.026616	0
HS_H3K27ac_10368	0.0512239	0
HS_H3K27ac_10369	0.0574413	0
HS_H3K27ac_103698	0.0682622	0
HS_H3K27ac_103699	0.0552936	0
HS_H3K27ac_10370	0.0736236	0
HS_H3K27ac_103700	0.036862	0
HS_H3K27ac_103703	0.0654563	0
HS_H3K27ac_103704	0.0655889	0
HS_H3K27ac_103705	0.0660754	0
HS_H3K27ac_103706	0.0633374	0
HS_H3K27ac_103707	0.0701754	0
HS_H3K27ac_103708	0.0655391	0
HS_H3K27ac_103709	0.0474342	0
HS_H3K27ac_10371	0.0611085	0
HS_H3K27ac_103710	0.0710967	0
HS_H3K27ac_103711	0.0610105	0
HS_H3K27ac_103712	0.0808031	0
HS_H3K27ac_103713	0.0600375	0
HS_H3K27ac_103714	0.051105	0
HS_H3K27ac_103715	0.0578778	0
HS_H3K27ac_103716	0.0553453	0
HS_H3K27ac_103717	0.0360401	0
HS_H3K27ac_103718	0.0695859	0
HS_H3K27ac_10372	0.0683258	0
HS_H3K27ac_103720	0.0639973	0
HS_H3K27ac_103721	0.0734119	0
HS_H3K27ac_103725	0.0564248	0
HS_H3K27ac_103726	0.0650009	0
HS_H3K27ac_10373	0.0621832	0
HS_H3K27ac_103730	0.0810463	0
HS_H3K27ac_103732	0.0671992	0
HS_H3K27ac_103735	0.0702643	0
HS_H3K27ac_103737	0.0633383	0
HS_H3K27ac_103738	0.0652038	0
HS_H3K27ac_103739	0.0471597	0
HS_H3K27ac_103740	0.0611765	0
HS_H3K27ac_103741	0.0673883	0
HS_H3K27ac_103742	0.0790111	0
HS_H3K27ac_103743	0.0649785	0
HS_H3K27ac_103745	0.0700265	0
HS_H3K27ac_103746	0.0564516	0
HS_H3K27ac_103747	0.0638298	0
HS_H3K27ac_103749	0.0590778	0
HS_H3K27ac_103752	0.0422092	0
HS_H3K27ac_103753	0.0493011	0
HS_H3K27ac_103755	0.0530472	0
HS_H3K27ac_103758	0.0557249	0
HS_H3K27ac_103759	0.0524862	0
HS_H3K27ac_10376	0.0662205	0
HS_H3K27ac_103760	0.0444664	0
HS_H3K27ac_103761	0.0622328	0
HS_H3K27ac_103762	0.0563771	0
HS_H3K27ac_103763	0.0548571	0
HS_H3K27ac_103764	0.070761	0
HS_H3K27ac_103766	0.0539857	0
HS_H3K27ac_103767	0.0708215	0
HS_H3K27ac_103769	0.0658702	0
HS_H3K27ac_103771	0.0424136	0
HS_H3K27ac_103772	0.0570743	0
HS_H3K27ac_103773	0.0474383	0
HS_H3K27ac_103775	0.0463744	0
HS_H3K27ac_103776	0.0494281	0
HS_H3K27ac_10378	0.0673162	0
HS_H3K27ac_103781	0.0679495	0
HS_H3K27ac_103782	0.0531577	0
HS_H3K27ac_103783	0.0533842	0
HS_H3K27ac_103789	0.041411	0
HS_H3K27ac_103790	0.0577889	0
HS_H3K27ac_103795	0.0609272	0
HS_H3K27ac_103796	0.054328	0
HS_H3K27ac_103797	0.0642333	0
HS_H3K27ac_103798	0.0630105	0
HS_H3K27ac_103799	0.0542986	0
HS_H3K27ac_10380	0.0675926	0
HS_H3K27ac_10381	0.06197	0
HS_H3K27ac_103818	0.0650912	0
HS_H3K27ac_103819	0.0607685	0
HS_H3K27ac_103820	0.0607009	0
HS_H3K27ac_103822	0.0625645	0
HS_H3K27ac_103823	0.0661905	0
HS_H3K27ac_103824	0.0623718	0
HS_H3K27ac_103825	0.0567867	0
HS_H3K27ac_103826	0.0624182	0
HS_H3K27ac_103827	0.0691783	0
HS_H3K27ac_103829	0.0640039	0
HS_H3K27ac_10383	0.0598227	0
HS_H3K27ac_103830	0.0436725	0
HS_H3K27ac_103833	0.0484127	0
HS_H3K27ac_103834	0.0532652	0
HS_H3K27ac_103835	0.0592933	0
HS_H3K27ac_103837	0.0513699	0
HS_H3K27ac_103838	0.0601719	0
HS_H3K27ac_103840	0.044898	0
HS_H3K27ac_103842	0.0655039	0
HS_H3K27ac_103843	0.0607465	0
HS_H3K27ac_103846	0.0685931	0
HS_H3K27ac_103848	0.0528437	0
HS_H3K27ac_103849	0.0564815	0
HS_H3K27ac_10385	0.0599305	0
HS_H3K27ac_103850	0.0566951	0
HS_H3K27ac_103852	0.0537897	0
HS_H3K27ac_103854	0.08106	0
HS_H3K27ac_103855	0.0682869	0
HS_H3K27ac_103859	0.0669236	0
HS_H3K27ac_103861	0.0578331	0
HS_H3K27ac_103863	0.0998878	0
HS_H3K27ac_103864	0.080981	1
HS_H3K27ac_103865	0.0625	0
HS_H3K27ac_103866	0.0715152	0
HS_H3K27ac_103867	0.0636738	0
HS_H3K27ac_103868	0.0855899	0
HS_H3K27ac_103869	0.0808511	0
HS_H3K27ac_103870	0.0569773	0
HS_H3K27ac_103873	0.0567276	0
HS_H3K27ac_103874	0.080506	0
HS_H3K27ac_103875	0.0526823	0
HS_H3K27ac_103876	0.0781099	0
HS_H3K27ac_103877	0.0573578	0
HS_H3K27ac_103878	0.0410898	0
HS_H3K27ac_103879	0.0645161	0
HS_H3K27ac_10388	0.00429184	0
HS_H3K27ac_103880	0.084199	0
HS_H3K27ac_103881	0.0568342	0
HS_H3K27ac_103882	0.0620542	0
HS_H3K27ac_103883	0.051825	0
HS_H3K27ac_103885	0.0537439	0
HS_H3K27ac_103888	0.0561674	0
HS_H3K27ac_103889	0.0587748	0
HS_H3K27ac_10389	0.053988	0
HS_H3K27ac_103890	0.0638801	0
HS_H3K27ac_103895	0.0565401	0
HS_H3K27ac_103896	0.0583671	0
HS_H3K27ac_103907	0.0631579	0
HS_H3K27ac_103908	0.0664806	0
HS_H3K27ac_103913	0.0715321	0
HS_H3K27ac_103917	0.0633947	0
HS_H3K27ac_103921	0.128777	0
HS_H3K27ac_103923	0.0434783	0
HS_H3K27ac_103924	0.0529655	0
HS_H3K27ac_103926	0.0500458	0
HS_H3K27ac_103927	0.037889	0
HS_H3K27ac_103928	0.0509915	0
HS_H3K27ac_103929	0.0679663	0
HS_H3K27ac_103930	0.0716284	0
HS_H3K27ac_103931	0.0643756	0
HS_H3K27ac_103932	0.0535183	0
HS_H3K27ac_103933	0.0747253	0
HS_H3K27ac_103934	0.0655219	0
HS_H3K27ac_103935	0.0690176	0
HS_H3K27ac_103936	0.0326679	0
HS_H3K27ac_103945	0.0464037	0
HS_H3K27ac_103954	0.0777597	0
HS_H3K27ac_103955	0.0720038	0
HS_H3K27ac_103956	0.0649475	0
HS_H3K27ac_103957	0.0332313	0
HS_H3K27ac_103958	0.0499764	0
HS_H3K27ac_103959	0.0490741	0
HS_H3K27ac_103961	0.0337224	0
HS_H3K27ac_103963	0.0690669	0
HS_H3K27ac_103967	0.041029	0
HS_H3K27ac_103968	0.0368852	0
HS_H3K27ac_103970	0.0518759	0
HS_H3K27ac_103971	0.0516304	0
HS_H3K27ac_103972	0.0379452	0
HS_H3K27ac_103975	0.0324226	0
HS_H3K27ac_103977	0.0616984	0
HS_H3K27ac_103978	0.0490731	0
HS_H3K27ac_103981	0.0598432	0
HS_H3K27ac_103982	0.0597185	0
HS_H3K27ac_103983	0.0642896	0
HS_H3K27ac_103984	0.0736579	0
HS_H3K27ac_103985	0.0837145	0
HS_H3K27ac_103986	0.0696023	0
HS_H3K27ac_103990	0.0650273	0
HS_H3K27ac_103992	0.0659288	0
HS_H3K27ac_103993	0.0591771	0
HS_H3K27ac_103994	0.0661408	0
HS_H3K27ac_103996	0.0747307	0
HS_H3K27ac_103999	0.0837742	0
HS_H3K27ac_104000	0.0759188	0
HS_H3K27ac_104001	0.0641207	0
HS_H3K27ac_104002	0.0645409	0
HS_H3K27ac_104004	0.0884793	0
HS_H3K27ac_104005	0.0718391	0
HS_H3K27ac_104006	0.0691515	0
HS_H3K27ac_104007	0.0508322	0
HS_H3K27ac_104008	0.0709564	0
HS_H3K27ac_104009	0.0693669	0
HS_H3K27ac_104010	0.0506092	0
HS_H3K27ac_104011	0.0514338	0
HS_H3K27ac_104012	0.0671673	0
HS_H3K27ac_104013	0.0570099	0
HS_H3K27ac_10402	0.0450199	0
HS_H3K27ac_104027	0.0616131	0
HS_H3K27ac_104028	0.0502447	0
HS_H3K27ac_104029	0.0533204	0
HS_H3K27ac_10403	0.0959852	0
HS_H3K27ac_104030	0.0542735	0
HS_H3K27ac_104031	0.0783654	0
HS_H3K27ac_104032	0.0500884	0
HS_H3K27ac_104033	0.0516129	0
HS_H3K27ac_104044	0.0453351	0
HS_H3K27ac_104045	0.0489282	0
HS_H3K27ac_104046	0.0600739	0
HS_H3K27ac_104047	0.0250535	0
HS_H3K27ac_104048	0.0631881	0
HS_H3K27ac_104049	0.021097	0
HS_H3K27ac_10405	0.0717022	0
HS_H3K27ac_104050	0.0438931	0
HS_H3K27ac_104051	0.0457599	0
HS_H3K27ac_104052	0.0383018	0
HS_H3K27ac_104053	0.0454737	0
HS_H3K27ac_104054	0.0605916	0
HS_H3K27ac_104055	0.0281818	0
HS_H3K27ac_104056	0.0426439	0
HS_H3K27ac_104057	0.0389718	0
HS_H3K27ac_104058	0.0462185	0
HS_H3K27ac_104059	0.0201183	0
HS_H3K27ac_104061	0.0462261	0
HS_H3K27ac_104066	0.0816222	0
HS_H3K27ac_104067	0.0607325	0
HS_H3K27ac_104071	0.0857219	0
HS_H3K27ac_104074	0.0648276	0
HS_H3K27ac_104075	0.0676726	0
HS_H3K27ac_104080	0.0638798	0
HS_H3K27ac_104090	0.0445375	0
HS_H3K27ac_104091	0.0589219	0
HS_H3K27ac_104094	0.0600775	0
HS_H3K27ac_10410	0.0706638	0
HS_H3K27ac_104109	0.0664155	0
HS_H3K27ac_104110	0.0589908	0
HS_H3K27ac_104112	0.0706215	0
HS_H3K27ac_104113	0.0573888	0
HS_H3K27ac_104115	0.0632022	0
HS_H3K27ac_10412	0.0443097	0
HS_H3K27ac_104120	0.0494418	0
HS_H3K27ac_104121	0.0679897	0
HS_H3K27ac_104122	0.0461049	0
HS_H3K27ac_104123	0.0802165	0
HS_H3K27ac_104124	0.123946	0
HS_H3K27ac_104125	0.0720222	0
HS_H3K27ac_104131	0.0331403	0
HS_H3K27ac_104132	0.0442623	0
HS_H3K27ac_104133	0.0532623	0
HS_H3K27ac_104134	0.039461	0
HS_H3K27ac_104135	0.066762	0
HS_H3K27ac_104137	0.0504004	0
HS_H3K27ac_104138	0.0724638	0
HS_H3K27ac_104139	0.0757504	0
HS_H3K27ac_10414	0.00729927	0
HS_H3K27ac_104140	0.0592179	0
HS_H3K27ac_10415	0.0579084	0
HS_H3K27ac_10418	0.0474501	0
HS_H3K27ac_104182	0.0927031	0
HS_H3K27ac_104184	0.0983743	0
HS_H3K27ac_104187	0.209524	0
HS_H3K27ac_104188	0.0810515	1
HS_H3K27ac_104190	0.100604	0
HS_H3K27ac_104194	0.0709564	0
HS_H3K27ac_104195	0.0833333	0
HS_H3K27ac_104205	0.0814551	0
HS_H3K27ac_104207	0.0546419	0
HS_H3K27ac_104226	0.0757576	0
HS_H3K27ac_104230	0.036435	0
HS_H3K27ac_104233	0.0917333	0
HS_H3K27ac_104236	0.0722543	0
HS_H3K27ac_10424	0.063228	0
HS_H3K27ac_104240	0.0511211	0
HS_H3K27ac_104245	0.0447065	0
HS_H3K27ac_104250	0.0552486	0
HS_H3K27ac_104251	0.0661263	0
HS_H3K27ac_104269	0.0745941	0
HS_H3K27ac_104279	0.066967	0
HS_H3K27ac_10428	0.05564	0
HS_H3K27ac_104284	0.0566313	0
HS_H3K27ac_104285	0.0602026	0
HS_H3K27ac_104286	0.0476706	0
HS_H3K27ac_104287	0.0541311	0
HS_H3K27ac_104288	0.0695771	0
HS_H3K27ac_104289	0.0791667	0
HS_H3K27ac_10429	0.0623488	0
HS_H3K27ac_104298	0.0812665	0
HS_H3K27ac_104299	0.0466284	0
HS_H3K27ac_10430	0.0771578	0
HS_H3K27ac_104300	0.0283505	0
HS_H3K27ac_104301	0.0694203	0
HS_H3K27ac_104302	0.0489796	0
HS_H3K27ac_104303	0.0515214	0
HS_H3K27ac_104304	0.0554758	0
HS_H3K27ac_104309	0.0654308	0
HS_H3K27ac_10431	0.0732861	0
HS_H3K27ac_104315	0.0666218	0
HS_H3K27ac_104318	0.0672708	0
HS_H3K27ac_10432	0.0688337	0
HS_H3K27ac_104320	0.0623846	0
HS_H3K27ac_104323	0.0753715	0
HS_H3K27ac_104330	0.051139	0
HS_H3K27ac_104336	0.0532088	0
HS_H3K27ac_104338	0.0699146	0
HS_H3K27ac_104339	0.0474522	0
HS_H3K27ac_10434	0.0938527	0
HS_H3K27ac_104340	0.0593485	0
HS_H3K27ac_104341	0.0808081	0
HS_H3K27ac_104342	0.0626147	0
HS_H3K27ac_104344	0.0719939	0
HS_H3K27ac_104346	0.093038	0
HS_H3K27ac_104347	0.0520873	0
HS_H3K27ac_104348	0.061657	0
HS_H3K27ac_104356	0.0765349	0
HS_H3K27ac_104357	0.0694345	0
HS_H3K27ac_10436	0.0568182	0
HS_H3K27ac_104360	0.0735376	0
HS_H3K27ac_104361	0.10071	0
HS_H3K27ac_104364	0.0884354	0
HS_H3K27ac_104370	0.0523308	0
HS_H3K27ac_104371	0.0740549	0
HS_H3K27ac_104372	0.0697482	0
HS_H3K27ac_104373	0.0716034	0
HS_H3K27ac_104375	0.0676255	0
HS_H3K27ac_104377	0.0427077	0
HS_H3K27ac_104378	0.0813197	0
HS_H3K27ac_104379	0.0787845	0
HS_H3K27ac_104380	0.0834043	0
HS_H3K27ac_104382	0.0668449	0
HS_H3K27ac_104384	0.133333	0
HS_H3K27ac_104385	0.0777405	0
HS_H3K27ac_104390	0.073991	0
HS_H3K27ac_104391	0.0492341	0
HS_H3K27ac_104393	0.0405316	0
HS_H3K27ac_104396	0.0544707	0
HS_H3K27ac_104398	0.0607631	0
HS_H3K27ac_104401	0.0525682	0
HS_H3K27ac_104402	0.0603131	0
HS_H3K27ac_104403	0.0463158	0
HS_H3K27ac_104405	0.0595568	0
HS_H3K27ac_104406	0.0470071	0
HS_H3K27ac_104407	0.0562845	0
HS_H3K27ac_104412	0.0820683	0
HS_H3K27ac_104420	0.0949574	0
HS_H3K27ac_104427	0.0743829	0
HS_H3K27ac_104429	0.0574163	0
HS_H3K27ac_104430	0.0606796	0
HS_H3K27ac_104431	0.0682523	0
HS_H3K27ac_104434	0.0639589	0
HS_H3K27ac_104435	0.055464	0
HS_H3K27ac_104436	0.0580819	0
HS_H3K27ac_104437	0.06569	0
HS_H3K27ac_104438	0.0554535	0
HS_H3K27ac_104439	0.0556309	0
HS_H3K27ac_104440	0.0584362	0
HS_H3K27ac_104446	0.0358796	0
HS_H3K27ac_104450	0.0850168	0
HS_H3K27ac_104453	0.0685841	0
HS_H3K27ac_104454	0.0675803	0
HS_H3K27ac_104455	0.071775	0
HS_H3K27ac_104456	0.0791463	0
HS_H3K27ac_104457	0.0627919	0
HS_H3K27ac_104462	0.0510024	0
HS_H3K27ac_104464	0.0601129	0
HS_H3K27ac_104466	0.0515203	0
HS_H3K27ac_104469	0.0581152	0
HS_H3K27ac_10448	0.0461828	0
HS_H3K27ac_104481	0.0406171	0
HS_H3K27ac_104482	0.0644876	0
HS_H3K27ac_104483	0.0531401	0
HS_H3K27ac_104486	0.0580748	0
HS_H3K27ac_104490	0.024069	0
HS_H3K27ac_104491	0.0379709	0
HS_H3K27ac_104492	0.0830619	0
HS_H3K27ac_104493	0.0662824	0
HS_H3K27ac_104494	0.0574614	1
HS_H3K27ac_104495	0.0565476	0
HS_H3K27ac_104496	0.0666356	0
HS_H3K27ac_104497	0.0285714	0
HS_H3K27ac_104501	0.0616094	0
HS_H3K27ac_104502	0.0496894	0
HS_H3K27ac_104503	0.0768826	0
HS_H3K27ac_104504	0.0575092	0
HS_H3K27ac_104505	0.0453744	0
HS_H3K27ac_104506	0.0722503	0
HS_H3K27ac_104507	0.0535221	0
HS_H3K27ac_104508	0.0644316	0
HS_H3K27ac_104510	0.0493506	0
HS_H3K27ac_104514	0.0580645	0
HS_H3K27ac_104520	0.0686529	0
HS_H3K27ac_104521	0.0645007	0
HS_H3K27ac_104522	0.05311	0
HS_H3K27ac_104523	0.0808882	0
HS_H3K27ac_104525	0.0438648	0
HS_H3K27ac_104526	0.0664155	0
HS_H3K27ac_104527	0.0614987	0
HS_H3K27ac_104528	0.0504277	0
HS_H3K27ac_104529	0.0524099	0
HS_H3K27ac_104530	0.0681711	0
HS_H3K27ac_104531	0.0622378	0
HS_H3K27ac_104532	0.0635209	0
HS_H3K27ac_104533	0.068323	0
HS_H3K27ac_104537	0.0614195	0
HS_H3K27ac_104538	0.0604797	0
HS_H3K27ac_104539	0.0803232	0
HS_H3K27ac_104540	0.0590164	0
HS_H3K27ac_104541	0.0529831	0
HS_H3K27ac_104542	0.0665188	0
HS_H3K27ac_104543	0.0777821	0
HS_H3K27ac_104544	0.0586466	0
HS_H3K27ac_104545	0.069341	0
HS_H3K27ac_104547	0.0586767	0
HS_H3K27ac_104548	0.0725849	0
HS_H3K27ac_104549	0.0772595	1
HS_H3K27ac_10455	0.0678357	0
HS_H3K27ac_104551	0.066888	0
HS_H3K27ac_104552	0.0684662	0
HS_H3K27ac_104556	0.0608909	0
HS_H3K27ac_104557	0.0633803	0
HS_H3K27ac_104558	0.0539699	0
HS_H3K27ac_10456	0.0587636	0
HS_H3K27ac_104561	0.0607843	0
HS_H3K27ac_104563	0.0468535	0
HS_H3K27ac_104564	0.0637185	0
HS_H3K27ac_10457	0.0492505	0
HS_H3K27ac_104571	0.0510845	0
HS_H3K27ac_104572	0.0507409	0
HS_H3K27ac_104573	0.053323	0
HS_H3K27ac_104575	0.0614923	0
HS_H3K27ac_104576	0.0568036	0
HS_H3K27ac_104578	0.0676759	0
HS_H3K27ac_104579	0.0614793	0
HS_H3K27ac_10458	0.0607044	0
HS_H3K27ac_104581	0.062288	0
HS_H3K27ac_104586	0.0605023	0
HS_H3K27ac_104589	0.0344984	0
HS_H3K27ac_10459	0.0652591	0
HS_H3K27ac_104590	0.0492656	0
HS_H3K27ac_104591	0.0664498	0
HS_H3K27ac_104592	0.0471753	0
HS_H3K27ac_104594	0.0717703	0
HS_H3K27ac_104595	0.0510295	0
HS_H3K27ac_104597	0.0527204	0
HS_H3K27ac_104599	0.0467005	0
HS_H3K27ac_10460	0.0385714	0
HS_H3K27ac_104600	0.0610438	0
HS_H3K27ac_104601	0.0479484	0
HS_H3K27ac_104602	0.0398702	0
HS_H3K27ac_104603	0.0362673	0
HS_H3K27ac_104604	0.0679262	0
HS_H3K27ac_104609	0.0884354	0
HS_H3K27ac_10461	0.0488372	0
HS_H3K27ac_104610	0.0741918	0
HS_H3K27ac_104611	0.0609493	0
HS_H3K27ac_104612	0.0533476	0
HS_H3K27ac_104619	0.0536976	0
HS_H3K27ac_10462	0.0719424	0
HS_H3K27ac_104620	0.0601057	0
HS_H3K27ac_104623	0.054941	0
HS_H3K27ac_104624	0.0607585	0
HS_H3K27ac_104625	0.0581443	0
HS_H3K27ac_104629	0.0632852	0
HS_H3K27ac_10463	0.0671012	0
HS_H3K27ac_104630	0.0594595	0
HS_H3K27ac_104631	0.044708	0
HS_H3K27ac_104632	0.0630456	0
HS_H3K27ac_104633	0.0633937	0
HS_H3K27ac_104634	0.0596026	0
HS_H3K27ac_104635	0.0628415	0
HS_H3K27ac_104637	0.0630813	0
HS_H3K27ac_104638	0.0617008	0
HS_H3K27ac_10464	0.0670103	0
HS_H3K27ac_104640	0.0596768	0
HS_H3K27ac_104641	0.0677434	0
HS_H3K27ac_104642	0.0661864	0
HS_H3K27ac_104643	0.0595416	0
HS_H3K27ac_104644	0.0595745	0
HS_H3K27ac_104645	0.0683136	0
HS_H3K27ac_104647	0.0574342	0
HS_H3K27ac_104648	0.054201	0
HS_H3K27ac_104651	0.0581108	0
HS_H3K27ac_104653	0.0579858	0
HS_H3K27ac_104655	0.067938	0
HS_H3K27ac_104656	0.0631543	0
HS_H3K27ac_104657	0.0659983	0
HS_H3K27ac_104658	0.0582719	0
HS_H3K27ac_104660	0.0614099	0
HS_H3K27ac_104662	0.0764453	0
HS_H3K27ac_104663	0.0739525	0
HS_H3K27ac_104666	0.0527046	0
HS_H3K27ac_104667	0.0658135	0
HS_H3K27ac_104668	0.0650259	0
HS_H3K27ac_104669	0.0795887	0
HS_H3K27ac_104671	0.0659805	0
HS_H3K27ac_104675	0.062436	0
HS_H3K27ac_104676	0.15366	0
HS_H3K27ac_104678	0.0471778	0
HS_H3K27ac_104679	0.0654371	0
HS_H3K27ac_104682	0.0489901	0
HS_H3K27ac_104684	0.0569343	0
HS_H3K27ac_104685	0.0589086	0
HS_H3K27ac_104686	0.0703189	0
HS_H3K27ac_104687	0.0758505	0
HS_H3K27ac_104690	0.0747915	0
HS_H3K27ac_104692	0.0776206	0
HS_H3K27ac_104693	0.0762608	0
HS_H3K27ac_104695	0.0591248	0
HS_H3K27ac_104696	0.073301	0
HS_H3K27ac_104697	0.0636559	0
HS_H3K27ac_104699	0.0845126	0
HS_H3K27ac_104701	0.0718157	0
HS_H3K27ac_104702	0.0633927	0
HS_H3K27ac_104708	0.0716407	0
HS_H3K27ac_104709	0.0742991	0
HS_H3K27ac_10471	0.0724802	0
HS_H3K27ac_104710	0.0635319	0
HS_H3K27ac_104715	0.0754998	0
HS_H3K27ac_104718	0.0607917	0
HS_H3K27ac_104719	0.0615079	0
HS_H3K27ac_10472	0.0723738	0
HS_H3K27ac_104720	0.0517007	0
HS_H3K27ac_104721	0.0805985	0
HS_H3K27ac_104722	0.0706714	0
HS_H3K27ac_104724	0.0538117	0
HS_H3K27ac_104725	0.0585823	0
HS_H3K27ac_104729	0.0530739	0
HS_H3K27ac_104730	0.0718151	0
HS_H3K27ac_104731	0.0727483	0
HS_H3K27ac_104733	0.0599369	0
HS_H3K27ac_104734	0.0748431	0
HS_H3K27ac_104735	0.0597976	0
HS_H3K27ac_104736	0.0548697	0
HS_H3K27ac_104739	0.048895	0
HS_H3K27ac_10474	0.0556452	0
HS_H3K27ac_104741	0.0605399	0
HS_H3K27ac_104744	0.0463128	0
HS_H3K27ac_104746	0.0545121	0
HS_H3K27ac_104747	0.0596517	0
HS_H3K27ac_104749	0.0330693	0
HS_H3K27ac_10475	0.0552408	0
HS_H3K27ac_104750	0.0559737	0
HS_H3K27ac_104754	0.0543528	0
HS_H3K27ac_104756	0.0622364	0
HS_H3K27ac_10476	0.0513029	0
HS_H3K27ac_104762	0.0657296	0
HS_H3K27ac_104763	0.0624704	0
HS_H3K27ac_104764	0.0658083	0
HS_H3K27ac_104765	0.0565952	0
HS_H3K27ac_104766	0.0608553	0
HS_H3K27ac_104767	0.0646531	0
HS_H3K27ac_104768	0.0728942	0
HS_H3K27ac_104769	0.0740852	0
HS_H3K27ac_104771	0.0690994	0
HS_H3K27ac_104773	0.0634597	0
HS_H3K27ac_104779	0.0555775	0
HS_H3K27ac_10478	0.0650855	0
HS_H3K27ac_10479	0.0664452	0
HS_H3K27ac_104791	0.0635731	0
HS_H3K27ac_104792	0.0529466	0
HS_H3K27ac_104793	0.0687913	0
HS_H3K27ac_104794	0.0651143	0
HS_H3K27ac_104795	0.051556	0
HS_H3K27ac_104796	0.0622407	0
HS_H3K27ac_104797	0.0756732	0
HS_H3K27ac_104798	0.0628684	0
HS_H3K27ac_104799	0.0434281	0
HS_H3K27ac_10480	0.0544425	0
HS_H3K27ac_104800	0.0753745	0
HS_H3K27ac_104801	0.068717	0
HS_H3K27ac_104802	0.0696864	0
HS_H3K27ac_104808	0.039398	0
HS_H3K27ac_10481	0.0456664	0
HS_H3K27ac_104814	0.0502092	0
HS_H3K27ac_104815	0.048957	0
HS_H3K27ac_104816	0.0430906	0
HS_H3K27ac_104817	0.0458085	0
HS_H3K27ac_104818	0.0691183	0
HS_H3K27ac_104819	0.0324149	0
HS_H3K27ac_10482	0.0373027	0
HS_H3K27ac_104820	0.0601193	0
HS_H3K27ac_104821	0.0498354	0
HS_H3K27ac_104827	0.0596026	0
HS_H3K27ac_104828	0.0676513	0
HS_H3K27ac_104829	0.059763	0
HS_H3K27ac_10483	0.0540166	0
HS_H3K27ac_104830	0.0498824	0
HS_H3K27ac_104831	0.058364	0
HS_H3K27ac_104834	0.0671296	1
HS_H3K27ac_104835	0.0517879	0
HS_H3K27ac_104836	0.0582115	0
HS_H3K27ac_10484	0.0827099	0
HS_H3K27ac_104841	0.0688788	0
HS_H3K27ac_104842	0.0585225	0
HS_H3K27ac_104844	0.0742913	0
HS_H3K27ac_104846	0.0668042	0
HS_H3K27ac_104847	0.0703625	0
HS_H3K27ac_104849	0.0592708	0
HS_H3K27ac_10485	0.0538462	0
HS_H3K27ac_104854	0.0567721	0
HS_H3K27ac_104855	0.0629151	0
HS_H3K27ac_104856	0.059434	0
HS_H3K27ac_104857	0.0696306	0
HS_H3K27ac_104858	0.0465435	0
HS_H3K27ac_104859	0.0488998	0
HS_H3K27ac_10486	0.039765	0
HS_H3K27ac_104861	0.0690846	0
HS_H3K27ac_104862	0.0510638	0
HS_H3K27ac_104869	0.0719328	0
HS_H3K27ac_104871	0.0540797	0
HS_H3K27ac_104872	0.0509687	0
HS_H3K27ac_104874	0.0477987	0
HS_H3K27ac_104875	0.0373027	0
HS_H3K27ac_104876	0.0522181	0
HS_H3K27ac_104877	0.0697451	0
HS_H3K27ac_104878	0.056267	0
HS_H3K27ac_104879	0.0655988	0
HS_H3K27ac_10488	0.0676884	0
HS_H3K27ac_104880	0.0630631	0
HS_H3K27ac_104881	0.0572198	0
HS_H3K27ac_104883	0.0737259	0
HS_H3K27ac_104884	0.0658041	0
HS_H3K27ac_104885	0.0669643	0
HS_H3K27ac_104886	0.0716595	0
HS_H3K27ac_104888	0.0598575	0
HS_H3K27ac_104889	0.0777638	0
HS_H3K27ac_10489	0.074537	0
HS_H3K27ac_104890	0.0532688	0
HS_H3K27ac_104891	0.0711176	0
HS_H3K27ac_104895	0.0627273	0
HS_H3K27ac_104898	0.0641691	0
HS_H3K27ac_10490	0.0760261	0
HS_H3K27ac_104901	0.0675816	0
HS_H3K27ac_10491	0.0725264	0
HS_H3K27ac_10492	0.0797373	0
HS_H3K27ac_10493	0.0628692	0
HS_H3K27ac_10494	0.0638108	0
HS_H3K27ac_10495	0.0590226	0
HS_H3K27ac_10496	0.0606897	0
HS_H3K27ac_10497	0.0700658	0
HS_H3K27ac_105057	0.0447363	0
HS_H3K27ac_105060	0.0658648	0
HS_H3K27ac_105063	0.0644809	0
HS_H3K27ac_105292	0.0674543	0
HS_H3K27ac_105301	0.0786802	0
HS_H3K27ac_105303	0.0657014	0
HS_H3K27ac_105307	0.0709039	0
HS_H3K27ac_105313	0.0574434	0
HS_H3K27ac_10533	0.0710808	0
HS_H3K27ac_10534	0.063557	0
HS_H3K27ac_105341	0.079763	0
HS_H3K27ac_10535	0.0725998	0
HS_H3K27ac_10539	0.0248042	0
HS_H3K27ac_10540	0.0747873	0
HS_H3K27ac_105405	0.0544893	0
HS_H3K27ac_105409	0.050906	0
HS_H3K27ac_10541	0.0632511	1
HS_H3K27ac_105410	0.0607407	0
HS_H3K27ac_105413	0.0801017	0
HS_H3K27ac_10542	0.072205	0
HS_H3K27ac_10543	0.0731183	0
HS_H3K27ac_10544	0.0697521	0
HS_H3K27ac_10547	0.0753102	0
HS_H3K27ac_10551	0.0619902	0
HS_H3K27ac_10552	0.0474891	0
HS_H3K27ac_10553	0.0314685	0
HS_H3K27ac_105548	0.0441883	0
HS_H3K27ac_105549	0.0623602	0
HS_H3K27ac_10555	0.0591412	0
HS_H3K27ac_105550	0.0849715	0
HS_H3K27ac_10557	0.0662461	0
HS_H3K27ac_105573	0.0675631	0
HS_H3K27ac_105575	0.0590406	0
HS_H3K27ac_10558	0.0727848	0
HS_H3K27ac_10559	0.0663183	0
HS_H3K27ac_105629	0.00946372	0
HS_H3K27ac_10567	0.0580169	0
HS_H3K27ac_10568	0.0674905	0
HS_H3K27ac_10569	0.0564054	0
HS_H3K27ac_10570	0.0672771	0
HS_H3K27ac_105700	0.0653108	0
HS_H3K27ac_105702	0.0626461	0
HS_H3K27ac_105703	0.063836	0
HS_H3K27ac_105704	0.0582433	0
HS_H3K27ac_105705	0.0605401	0
HS_H3K27ac_105706	0.070841	0
HS_H3K27ac_105707	0.0703518	0
HS_H3K27ac_105708	0.0670103	0
HS_H3K27ac_105709	0.063593	0
HS_H3K27ac_105710	0.0689895	0
HS_H3K27ac_105712	0.0557805	0
HS_H3K27ac_105713	0.049654	0
HS_H3K27ac_105717	0.0623202	0
HS_H3K27ac_105718	0.0634869	0
HS_H3K27ac_10572	0.0563298	0
HS_H3K27ac_10573	0.0518834	0
HS_H3K27ac_10575	0.0683805	0
HS_H3K27ac_10579	0.0624432	0
HS_H3K27ac_105798	0.0789658	0
HS_H3K27ac_105801	0.0557116	0
HS_H3K27ac_105802	0.0676856	0
HS_H3K27ac_105804	0.0473538	0
HS_H3K27ac_105812	0.0603106	0
HS_H3K27ac_105813	0.0747452	1
HS_H3K27ac_105819	0.0817844	0
HS_H3K27ac_105820	0.0591362	0
HS_H3K27ac_105821	0.0634259	0
HS_H3K27ac_105822	0.0607193	0
HS_H3K27ac_105823	0.0577089	0
HS_H3K27ac_105827	0.0577191	0
HS_H3K27ac_10583	0.0694772	0
HS_H3K27ac_105840	0.0596391	0
HS_H3K27ac_105851	0.0577145	0
HS_H3K27ac_105852	0.0654563	0
HS_H3K27ac_105853	0.066641	0
HS_H3K27ac_105854	0.0718273	0
HS_H3K27ac_105855	0.0714976	0
HS_H3K27ac_105856	0.0709578	0
HS_H3K27ac_105859	0.0777727	0
HS_H3K27ac_10586	0.0737852	0
HS_H3K27ac_105860	0.06875	0
HS_H3K27ac_105866	0.060309	0
HS_H3K27ac_105868	0.0495455	0
HS_H3K27ac_105869	0.0596026	0
HS_H3K27ac_10587	0.0707676	0
HS_H3K27ac_105870	0.0597394	0
HS_H3K27ac_105872	0.0493885	0
HS_H3K27ac_105873	0.0634624	0
HS_H3K27ac_105874	0.0638298	0
HS_H3K27ac_105875	0.0603762	0
HS_H3K27ac_105876	0.0510381	0
HS_H3K27ac_105877	0.0807747	0
HS_H3K27ac_105880	0.0733285	0
HS_H3K27ac_105881	0.0611888	0
HS_H3K27ac_105883	0.0712555	0
HS_H3K27ac_105884	0.070443	0
HS_H3K27ac_105887	0.0735721	0
HS_H3K27ac_105888	0.0635735	0
HS_H3K27ac_105891	0.0581766	0
HS_H3K27ac_105893	0.0415364	0
HS_H3K27ac_105894	0.0552251	0
HS_H3K27ac_105895	0.0729899	0
HS_H3K27ac_105896	0.0567929	0
HS_H3K27ac_105897	0.0603387	0
HS_H3K27ac_105900	0.0548869	0
HS_H3K27ac_105908	0.0570728	0
HS_H3K27ac_105909	0.0588566	0
HS_H3K27ac_105911	0.0601641	0
HS_H3K27ac_105912	0.0620155	0
HS_H3K27ac_105914	0.0605735	0
HS_H3K27ac_105915	0.0606526	0
HS_H3K27ac_105917	0.0654545	0
HS_H3K27ac_105925	0.0728689	0
HS_H3K27ac_105928	0.0495049	0
HS_H3K27ac_105929	0.0667276	0
HS_H3K27ac_10593	0.0667778	0
HS_H3K27ac_105930	0.0591006	0
HS_H3K27ac_105931	0.0481416	0
HS_H3K27ac_105933	0.0809717	0
HS_H3K27ac_105934	0.0754902	0
HS_H3K27ac_105935	0.0581976	0
HS_H3K27ac_105938	0.0637792	0
HS_H3K27ac_105939	0.0706598	0
HS_H3K27ac_105940	0.0722543	0
HS_H3K27ac_105941	0.0497758	0
HS_H3K27ac_105942	0.0554124	1
HS_H3K27ac_105943	0.063243	0
HS_H3K27ac_105944	0.0884058	0
HS_H3K27ac_105945	0.0706033	0
HS_H3K27ac_105946	0.0553191	0
HS_H3K27ac_105947	0.323017	0
HS_H3K27ac_105948	0.0613718	0
HS_H3K27ac_105949	0.0522388	0
HS_H3K27ac_105950	0.0678776	0
HS_H3K27ac_105951	0.0511737	0
HS_H3K27ac_105953	0.0676443	0
HS_H3K27ac_105957	0.0501059	0
HS_H3K27ac_105958	0.0534224	0
HS_H3K27ac_105959	0.0665666	0
HS_H3K27ac_105964	0.0530612	0
HS_H3K27ac_105968	0.0620155	0
HS_H3K27ac_105972	0.0513176	0
HS_H3K27ac_105977	0.0331296	0
HS_H3K27ac_105981	0.0499748	0
HS_H3K27ac_105989	0.069296	0
HS_H3K27ac_105991	0.0696203	0
HS_H3K27ac_105992	0.0502532	0
HS_H3K27ac_105993	0.0647169	0
HS_H3K27ac_105994	0.0527473	0
HS_H3K27ac_105995	0.0798403	0
HS_H3K27ac_105996	0.0533689	0
HS_H3K27ac_105999	0.0624	0
HS_H3K27ac_106000	0.0513223	0
HS_H3K27ac_106002	0.0599355	0
HS_H3K27ac_106003	0.0610815	0
HS_H3K27ac_106005	0.057377	0
HS_H3K27ac_106006	0.074528	0
HS_H3K27ac_106008	0.0778302	0
HS_H3K27ac_10602	0.0662906	0
HS_H3K27ac_106022	0.0781711	0
HS_H3K27ac_106029	0.0651985	0
HS_H3K27ac_10603	0.0765027	0
HS_H3K27ac_10604	0.0611396	0
HS_H3K27ac_106047	0.057971	0
HS_H3K27ac_106048	0.064276	0
HS_H3K27ac_106049	0.0670051	0
HS_H3K27ac_106050	0.0738892	0
HS_H3K27ac_106055	0.0495905	0
HS_H3K27ac_106056	0.0459016	0
HS_H3K27ac_106057	0.0735516	0
HS_H3K27ac_106058	0.0527033	0
HS_H3K27ac_106059	0.0538847	0
HS_H3K27ac_10606	0.0736453	0
HS_H3K27ac_106060	0.0497535	0
HS_H3K27ac_106061	0.0560528	0
HS_H3K27ac_106062	0.0600632	0
HS_H3K27ac_106063	0.0718924	0
HS_H3K27ac_106064	0.0697115	0
HS_H3K27ac_106065	0.0569106	0
HS_H3K27ac_106066	0.0659637	0
HS_H3K27ac_106067	0.0548968	0
HS_H3K27ac_106068	0.0624551	0
HS_H3K27ac_106070	0.030303	0
HS_H3K27ac_106071	0.0561028	0
HS_H3K27ac_106072	0.0542495	0
HS_H3K27ac_106074	0.0704671	0
HS_H3K27ac_106075	0.0505481	0
HS_H3K27ac_106076	0.0542986	0
HS_H3K27ac_106077	0.172619	0
HS_H3K27ac_106078	0.0522979	0
HS_H3K27ac_106079	0.0528376	0
HS_H3K27ac_10608	0.0671089	0
HS_H3K27ac_106080	0.0388307	0
HS_H3K27ac_106082	0.0619363	0
HS_H3K27ac_106084	0.0484874	0
HS_H3K27ac_106085	0.0587419	0
HS_H3K27ac_106086	0.0561134	0
HS_H3K27ac_106088	0.0519424	0
HS_H3K27ac_106089	0.0652278	0
HS_H3K27ac_10609	0.0668113	0
HS_H3K27ac_106090	0.0638031	0
HS_H3K27ac_106099	0.0396565	0
HS_H3K27ac_10610	0.0778178	0
HS_H3K27ac_106101	0.0520638	0
HS_H3K27ac_106102	0.045716	0
HS_H3K27ac_106103	0.0432526	0
HS_H3K27ac_106104	0.0471014	0
HS_H3K27ac_106105	0.0649115	0
HS_H3K27ac_106106	0.0542487	0
HS_H3K27ac_106111	0.0612245	0
HS_H3K27ac_106112	0.0430328	0
HS_H3K27ac_106113	0.0518585	0
HS_H3K27ac_106114	0.0713324	0
HS_H3K27ac_106118	0.0784381	0
HS_H3K27ac_106119	0.0664571	0
HS_H3K27ac_106120	0.0577493	0
HS_H3K27ac_106121	0.0677736	0
HS_H3K27ac_106122	0.0586618	0
HS_H3K27ac_106123	0.05385	0
HS_H3K27ac_106127	0.0722624	0
HS_H3K27ac_106129	0	0
HS_H3K27ac_10613	0.0628164	0
HS_H3K27ac_106134	0.0713826	0
HS_H3K27ac_106137	0.0526636	0
HS_H3K27ac_106138	0.0502092	0
HS_H3K27ac_106142	0.0543807	0
HS_H3K27ac_106143	0.0698549	0
HS_H3K27ac_106153	0.0537525	0
HS_H3K27ac_106156	0.0434444	0
HS_H3K27ac_106157	0.0735835	0
HS_H3K27ac_106158	0.0590909	0
HS_H3K27ac_106159	0.0470441	0
HS_H3K27ac_10616	0.0833333	0
HS_H3K27ac_106160	0.0835322	0
HS_H3K27ac_106161	0.0588768	0
HS_H3K27ac_106162	0.0656425	0
HS_H3K27ac_106164	0.0573966	0
HS_H3K27ac_106166	0.0821678	0
HS_H3K27ac_106167	0.0612733	0
HS_H3K27ac_106168	0.0691076	0
HS_H3K27ac_106186	0.0544436	0
HS_H3K27ac_106189	0.048	0
HS_H3K27ac_10619	0.0632653	0
HS_H3K27ac_106190	0.0586797	0
HS_H3K27ac_106202	0.0647603	0
HS_H3K27ac_106203	0.0567115	0
HS_H3K27ac_106204	0.0467426	0
HS_H3K27ac_106206	0.0561252	0
HS_H3K27ac_106207	0.0547703	0
HS_H3K27ac_106209	0.061615	0
HS_H3K27ac_10621	0.0593081	0
HS_H3K27ac_106210	0.0491096	0
HS_H3K27ac_106214	0.0667055	0
HS_H3K27ac_106217	0.075179	0
HS_H3K27ac_106218	0.0747817	0
HS_H3K27ac_106219	0.0584079	0
HS_H3K27ac_106220	0.0671708	0
HS_H3K27ac_106221	0.069425	0
HS_H3K27ac_106225	0.0624683	0
HS_H3K27ac_106231	0.0681319	0
HS_H3K27ac_106232	0.06539	0
HS_H3K27ac_106233	0.0620438	0
HS_H3K27ac_106234	0.063012	0
HS_H3K27ac_106236	0.0515706	0
HS_H3K27ac_106237	0.0579515	0
HS_H3K27ac_106238	0.0555556	0
HS_H3K27ac_106239	0.0448663	0
HS_H3K27ac_10624	0.0724423	0
HS_H3K27ac_106244	0.0703893	0
HS_H3K27ac_106245	0.0513498	0
HS_H3K27ac_106246	0.0420908	0
HS_H3K27ac_106249	0.0338919	0
HS_H3K27ac_106250	0.0568934	0
HS_H3K27ac_106259	0.0393817	0
HS_H3K27ac_10626	0.04913	0
HS_H3K27ac_106261	0.062291	0
[truncated: 37,689 more rows]

## Sheet: marmoset
CRE	subs_per_total	conservation_status
HS_H3K27ac_10000	0.0949165	0
HS_H3K27ac_10002	0.341633	0
HS_H3K27ac_10003	0.116386	0
HS_H3K27ac_10004	0.187656	0
HS_H3K27ac_10009	0.106136	0
HS_H3K27ac_10010	0.131009	0
HS_H3K27ac_10011	0.127131	0
HS_H3K27ac_10012	0.103415	0
HS_H3K27ac_10013	0.0853041	0
HS_H3K27ac_10014	0.155598	0
HS_H3K27ac_10016	0.443223	0
HS_H3K27ac_10017	0.529771	0
HS_H3K27ac_10018	0.101049	0
HS_H3K27ac_10019	0.102724	0
HS_H3K27ac_10020	0.0820996	0
HS_H3K27ac_10021	0.103914	0
HS_H3K27ac_10022	0.0757358	0
HS_H3K27ac_10023	0.0845725	0
HS_H3K27ac_100232	0.0933786	0
HS_H3K27ac_100233	0.17962	0
HS_H3K27ac_10024	0.0725778	0
HS_H3K27ac_100241	0.183718	0
HS_H3K27ac_100247	0.165007	0
HS_H3K27ac_100248	0.169418	0
HS_H3K27ac_100251	0.181729	1
HS_H3K27ac_100252	0.162393	0
HS_H3K27ac_10026	0.0683919	0
HS_H3K27ac_10027	0.059081	0
HS_H3K27ac_100271	0.16045	0
HS_H3K27ac_10028	0.0951567	0
HS_H3K27ac_10029	0.0885589	0
HS_H3K27ac_10030	0.0776968	0
HS_H3K27ac_10032	0.102986	0
HS_H3K27ac_10034	0.0950634	0
HS_H3K27ac_100370	0.160599	0
HS_H3K27ac_100374	0.168114	0
HS_H3K27ac_100377	0.162265	0
HS_H3K27ac_100397	0.084	0
HS_H3K27ac_100400	0.113821	1
HS_H3K27ac_10046	0.112518	0
HS_H3K27ac_100461	0.21601	0
HS_H3K27ac_100462	0.205213	0
HS_H3K27ac_100465	0.256676	0
HS_H3K27ac_100466	0.249825	0
HS_H3K27ac_100467	0.225644	0
HS_H3K27ac_10053	0.19884	0
HS_H3K27ac_100549	0.181034	1
HS_H3K27ac_100558	0.24371	0
HS_H3K27ac_10056	0.118656	0
HS_H3K27ac_100561	0.156359	0
HS_H3K27ac_100565	0.137893	0
HS_H3K27ac_100568	0.206505	0
HS_H3K27ac_100570	0.132141	0
HS_H3K27ac_10058	0.149029	0
HS_H3K27ac_10060	0.090847	0
HS_H3K27ac_10061	0.0837349	0
HS_H3K27ac_10063	0.0941176	0
HS_H3K27ac_10064	0.208816	0
HS_H3K27ac_10065	0.0880503	0
HS_H3K27ac_10067	0.0808762	0
HS_H3K27ac_100676	0.133953	0
HS_H3K27ac_100677	0.12987	0
HS_H3K27ac_100678	0.19162	0
HS_H3K27ac_10068	0.0906631	1
HS_H3K27ac_100680	0.2	1
HS_H3K27ac_100682	0.178659	0
HS_H3K27ac_10069	0.0903912	0
HS_H3K27ac_100690	0.103681	0
HS_H3K27ac_100691	0.12212	0
HS_H3K27ac_100693	0.101964	0
HS_H3K27ac_100694	0.108527	0
HS_H3K27ac_100695	0.112716	0
HS_H3K27ac_100698	0.129167	0
HS_H3K27ac_10070	0.0951977	0
HS_H3K27ac_100704	0.117199	0
HS_H3K27ac_100706	0.0970305	0
HS_H3K27ac_100707	0.105817	0
HS_H3K27ac_100708	0.127062	0
HS_H3K27ac_100709	0.104797	0
HS_H3K27ac_100710	0.1303	0
HS_H3K27ac_100711	0.0894681	0
HS_H3K27ac_100713	0.0811594	0
HS_H3K27ac_100715	0.140899	0
HS_H3K27ac_100718	0.146027	0
HS_H3K27ac_100719	0.0934579	0
HS_H3K27ac_10072	0.0651769	0
HS_H3K27ac_100720	0.101332	0
HS_H3K27ac_100721	0.111076	0
HS_H3K27ac_100724	0.0980769	0
HS_H3K27ac_100727	0.0682739	0
HS_H3K27ac_100728	0.0667638	0
HS_H3K27ac_100729	0.0872993	0
HS_H3K27ac_10073	0.0780525	0
HS_H3K27ac_10074	0.0640331	0
HS_H3K27ac_100741	0.116627	0
HS_H3K27ac_100744	0.333533	0
HS_H3K27ac_100745	0.101329	0
HS_H3K27ac_10075	0.105413	0
HS_H3K27ac_100750	0.120104	0
HS_H3K27ac_100755	0.0998383	0
HS_H3K27ac_10076	0.0782313	0
HS_H3K27ac_100761	0.0995831	0
HS_H3K27ac_100778	0.101213	0
HS_H3K27ac_100779	0.104867	0
HS_H3K27ac_100780	0.057939	0
HS_H3K27ac_100781	0.102372	0
HS_H3K27ac_100782	0.0883924	0
HS_H3K27ac_100783	0.0953622	0
HS_H3K27ac_10079	0.0592417	0
HS_H3K27ac_1008	0.120172	0
HS_H3K27ac_10080	0.0757665	0
HS_H3K27ac_100803	0.11298	0
HS_H3K27ac_100804	0.204886	0
HS_H3K27ac_10081	0.0675991	0
HS_H3K27ac_100812	0.114686	0
HS_H3K27ac_100813	0.0939306	0
HS_H3K27ac_10082	0.0842739	0
HS_H3K27ac_100820	0.0843882	1
HS_H3K27ac_100821	0.0892857	0
HS_H3K27ac_100822	0.082243	0
HS_H3K27ac_100823	0.0787435	0
HS_H3K27ac_100824	0.0287003	0
HS_H3K27ac_100825	0.0604629	0
HS_H3K27ac_100826	0.111136	0
HS_H3K27ac_100828	0.0923623	0
HS_H3K27ac_100829	0.0977414	0
HS_H3K27ac_100831	0.0992835	0
HS_H3K27ac_100835	0.0931436	0
HS_H3K27ac_100836	0.112858	0
HS_H3K27ac_100837	0.0974504	0
HS_H3K27ac_100838	0.12549	0
HS_H3K27ac_100839	0.0982332	0
HS_H3K27ac_100842	0.0820219	0
HS_H3K27ac_100843	0.119484	0
HS_H3K27ac_10085	0.0819319	0
HS_H3K27ac_10086	0.0959545	0
HS_H3K27ac_100862	0.0939633	0
HS_H3K27ac_100863	0.134066	0
HS_H3K27ac_100864	0.112242	0
HS_H3K27ac_100868	0.136819	0
HS_H3K27ac_100869	0.0953206	0
HS_H3K27ac_10087	0.0786426	0
HS_H3K27ac_100870	0.11007	0
HS_H3K27ac_100871	0.09349	0
HS_H3K27ac_100873	0.0754226	1
HS_H3K27ac_100874	0.0751634	0
HS_H3K27ac_100875	0.0820996	0
HS_H3K27ac_100876	0.112888	0
HS_H3K27ac_100896	0.119116	0
HS_H3K27ac_10090	0.101567	0
HS_H3K27ac_100904	0.119457	0
HS_H3K27ac_10091	0.116788	0
HS_H3K27ac_100914	0.130877	0
HS_H3K27ac_100916	0.131974	0
HS_H3K27ac_100917	0.103674	0
HS_H3K27ac_10092	0.100132	0
HS_H3K27ac_100926	0.115435	0
HS_H3K27ac_100927	0.0560716	0
HS_H3K27ac_100929	0.116618	0
HS_H3K27ac_100930	0.112577	0
HS_H3K27ac_100935	0.115942	0
HS_H3K27ac_100937	0.190197	0
HS_H3K27ac_100938	0.12305	0
HS_H3K27ac_10094	0.0838395	0
HS_H3K27ac_100940	0.116725	0
HS_H3K27ac_100941	0.328785	0
HS_H3K27ac_100944	0.108406	0
HS_H3K27ac_100946	0.0931818	0
HS_H3K27ac_100947	0.201451	0
HS_H3K27ac_100948	0.113258	0
HS_H3K27ac_100951	0.107964	0
HS_H3K27ac_100952	0.115431	0
HS_H3K27ac_100953	0.130676	0
HS_H3K27ac_100954	0.106731	0
HS_H3K27ac_100955	0.107196	0
HS_H3K27ac_100956	0.1	0
HS_H3K27ac_100957	0.112681	0
HS_H3K27ac_100958	0.111147	0
HS_H3K27ac_100960	0.104651	0
HS_H3K27ac_100962	0.11444	0
HS_H3K27ac_100963	0.08933	0
HS_H3K27ac_100964	0.099564	0
HS_H3K27ac_100968	0.168888	0
HS_H3K27ac_100970	0.157103	0
HS_H3K27ac_100972	0.142446	0
HS_H3K27ac_100981	0.116846	0
HS_H3K27ac_100985	0.102118	0
HS_H3K27ac_100986	0.112903	1
HS_H3K27ac_100987	0.123348	0
HS_H3K27ac_100989	0.110377	0
HS_H3K27ac_100990	0.0814458	0
HS_H3K27ac_100992	0.119619	0
HS_H3K27ac_100994	0.148515	0
HS_H3K27ac_100996	0.126869	0
HS_H3K27ac_100998	0.290892	0
HS_H3K27ac_10100	0.0806209	0
HS_H3K27ac_101007	0.126073	0
HS_H3K27ac_101008	0.0943586	0
HS_H3K27ac_10101	0.118653	0
HS_H3K27ac_101010	0.0785613	0
HS_H3K27ac_101011	0.113865	0
HS_H3K27ac_101013	0.112287	0
HS_H3K27ac_10102	0.0507614	0
HS_H3K27ac_101021	0.0909091	0
HS_H3K27ac_101022	0.107763	0
HS_H3K27ac_101023	0.105973	0
HS_H3K27ac_101024	0.0943026	0
HS_H3K27ac_101025	0.0960111	0
HS_H3K27ac_101026	0.104885	0
HS_H3K27ac_101029	0.0910816	0
HS_H3K27ac_10103	0.133755	0
HS_H3K27ac_101033	0.111406	0
HS_H3K27ac_101035	0.0908319	0
HS_H3K27ac_101037	0.0926496	0
HS_H3K27ac_101039	0.115949	0
HS_H3K27ac_10104	0.10628	0
HS_H3K27ac_101040	0.121049	0
HS_H3K27ac_101041	0.0996169	0
HS_H3K27ac_10106	0.143396	0
HS_H3K27ac_101060	0.0864475	0
HS_H3K27ac_10107	0.145161	0
HS_H3K27ac_10108	0.075122	0
HS_H3K27ac_101084	0.11779	0
HS_H3K27ac_101085	0.123805	0
HS_H3K27ac_101086	0.116691	0
HS_H3K27ac_101088	0.0958084	0
HS_H3K27ac_101089	0.113147	0
HS_H3K27ac_101091	0.113522	0
HS_H3K27ac_101092	0.093711	0
HS_H3K27ac_101093	0.089082	0
HS_H3K27ac_101094	0.0975828	0
HS_H3K27ac_101096	0.116726	0
HS_H3K27ac_101097	0.111776	0
HS_H3K27ac_101098	0.0880546	0
HS_H3K27ac_101111	0.0972973	0
HS_H3K27ac_101112	0.087191	0
HS_H3K27ac_101113	0.0915244	0
HS_H3K27ac_101114	0.0960699	0
HS_H3K27ac_101115	0.134609	0
HS_H3K27ac_101116	0.0936986	0
HS_H3K27ac_101117	0.0861478	0
HS_H3K27ac_101118	0.103688	0
HS_H3K27ac_101119	0.115344	0
HS_H3K27ac_101122	0.334084	0
HS_H3K27ac_101182	0.136804	0
HS_H3K27ac_101235	0.116528	0
HS_H3K27ac_101237	0.110324	0
HS_H3K27ac_101240	0.115124	0
HS_H3K27ac_101244	0.10626	0
HS_H3K27ac_101247	0.126225	0
HS_H3K27ac_101249	0.124966	0
HS_H3K27ac_101252	0.119585	0
HS_H3K27ac_101260	0.191467	0
HS_H3K27ac_101261	0.114437	0
HS_H3K27ac_101263	0.112787	0
HS_H3K27ac_101267	0.135417	0
HS_H3K27ac_101269	0.129129	0
HS_H3K27ac_101270	0.181359	0
HS_H3K27ac_101272	0.108715	0
HS_H3K27ac_101273	0.123662	0
HS_H3K27ac_101274	0.118203	0
HS_H3K27ac_101275	0.141855	0
HS_H3K27ac_101279	0.13275	0
HS_H3K27ac_101281	0.128374	0
HS_H3K27ac_101285	0.171107	0
HS_H3K27ac_10130	0.12472	0
HS_H3K27ac_101337	0.400787	0
HS_H3K27ac_101339	0.402693	0
HS_H3K27ac_10134	0.174316	0
HS_H3K27ac_101341	0.0939865	0
HS_H3K27ac_101342	0.21991	0
HS_H3K27ac_101347	0.248802	0
HS_H3K27ac_101348	0.10509	0
HS_H3K27ac_101349	0.127078	0
HS_H3K27ac_10135	0.140671	0
HS_H3K27ac_101350	0.162393	0
HS_H3K27ac_101351	0.210507	0
HS_H3K27ac_101357	0.1169	0
HS_H3K27ac_101359	0.416539	0
HS_H3K27ac_101360	0.136436	0
HS_H3K27ac_101365	0.127677	0
HS_H3K27ac_101367	0.118762	0
HS_H3K27ac_101368	0.130523	0
HS_H3K27ac_101369	0.128015	0
HS_H3K27ac_101370	0.124138	0
HS_H3K27ac_101372	0.129913	0
HS_H3K27ac_101374	0.136534	0
HS_H3K27ac_101376	0.127825	0
HS_H3K27ac_101377	0.126482	0
HS_H3K27ac_10138	0.108004	0
HS_H3K27ac_101382	0.146943	0
HS_H3K27ac_101385	0.086	0
HS_H3K27ac_10139	0.126462	0
HS_H3K27ac_10140	0.0852503	0
HS_H3K27ac_10142	0.101656	0
HS_H3K27ac_101422	0.0916129	0
HS_H3K27ac_101423	0.122736	0
HS_H3K27ac_101427	0.20743	0
HS_H3K27ac_101432	0.166524	0
HS_H3K27ac_101434	0.121111	0
HS_H3K27ac_101436	0.142857	0
HS_H3K27ac_101439	0.145236	0
HS_H3K27ac_101442	0.122917	0
HS_H3K27ac_101465	0.148952	0
HS_H3K27ac_101466	0.129981	0
HS_H3K27ac_101467	0.157583	0
HS_H3K27ac_10147	0.131631	0
HS_H3K27ac_101473	0.114558	0
HS_H3K27ac_101474	0.115442	0
HS_H3K27ac_101475	0.137405	0
HS_H3K27ac_10149	0.0894719	0
HS_H3K27ac_101493	0.11474	0
HS_H3K27ac_101496	0.118335	0
HS_H3K27ac_101497	0.0978166	0
HS_H3K27ac_101499	0.0765766	0
HS_H3K27ac_101500	0.117677	0
HS_H3K27ac_10151	0.116098	0
HS_H3K27ac_101519	0.117008	0
HS_H3K27ac_10152	0.106574	0
HS_H3K27ac_10153	0.180982	0
HS_H3K27ac_10156	0.124344	0
HS_H3K27ac_10157	0.126712	0
HS_H3K27ac_10158	0.109091	0
HS_H3K27ac_1016	0.163973	0
HS_H3K27ac_101616	0.103432	0
HS_H3K27ac_101617	0.111058	0
HS_H3K27ac_101618	0.11345	0
HS_H3K27ac_10163	0.0883899	0
HS_H3K27ac_10164	0.11066	0
HS_H3K27ac_10165	0.102181	0
HS_H3K27ac_10167	0.113626	0
HS_H3K27ac_10168	0.100678	0
HS_H3K27ac_10169	0.0959933	0
HS_H3K27ac_10171	0.0976135	0
HS_H3K27ac_101713	0.122796	0
HS_H3K27ac_101715	0.0808449	0
HS_H3K27ac_101725	0.421739	0
HS_H3K27ac_101726	0.13284	0
HS_H3K27ac_101727	0.123492	0
HS_H3K27ac_101729	0.140261	0
HS_H3K27ac_101730	0.123031	0
HS_H3K27ac_101731	0.142467	1
HS_H3K27ac_101732	0.124291	0
HS_H3K27ac_101733	0.124808	0
HS_H3K27ac_101735	0.136767	0
HS_H3K27ac_101736	0.130679	0
HS_H3K27ac_101737	0.0588235	1
HS_H3K27ac_10174	0.120493	0
HS_H3K27ac_101742	0.117411	0
HS_H3K27ac_101743	0.0747664	0
HS_H3K27ac_101744	0.115385	0
HS_H3K27ac_101745	0.0925926	0
HS_H3K27ac_101746	0.0931615	0
HS_H3K27ac_101747	0.12261	0
HS_H3K27ac_101748	0.110634	0
HS_H3K27ac_101749	0.109685	0
HS_H3K27ac_101750	0.110112	0
HS_H3K27ac_101753	0.0971897	0
HS_H3K27ac_101757	0.075	0
HS_H3K27ac_101758	0.146103	0
HS_H3K27ac_101759	0.0844063	1
HS_H3K27ac_101760	0.107358	0
HS_H3K27ac_101761	0.126046	0
HS_H3K27ac_101762	0.115452	0
HS_H3K27ac_101763	0.0987144	0
HS_H3K27ac_101764	0.118265	0
HS_H3K27ac_101768	0.125249	0
HS_H3K27ac_101769	0.110163	0
HS_H3K27ac_10177	0.110484	0
HS_H3K27ac_101770	0.0967247	0
HS_H3K27ac_101782	0.0990991	0
HS_H3K27ac_101783	0.110184	0
HS_H3K27ac_101785	0.107164	0
HS_H3K27ac_101787	0.112567	0
HS_H3K27ac_101791	0.115986	0
HS_H3K27ac_101792	0.13577	0
HS_H3K27ac_101793	0.0744076	0
HS_H3K27ac_101794	0.114239	0
HS_H3K27ac_101795	0.106061	0
HS_H3K27ac_101796	0.129979	1
HS_H3K27ac_101797	0.0746269	0
HS_H3K27ac_101798	0.102335	0
HS_H3K27ac_101799	0.0752254	0
HS_H3K27ac_101800	0.0761099	1
HS_H3K27ac_101804	0.150548	1
HS_H3K27ac_101805	0.133132	0
HS_H3K27ac_101806	0.118299	0
HS_H3K27ac_101810	0.120467	0
HS_H3K27ac_101811	0.0925778	0
HS_H3K27ac_101817	0.137408	0
HS_H3K27ac_101818	0.101757	0
HS_H3K27ac_101819	0.0790359	0
HS_H3K27ac_101822	0.0624258	0
HS_H3K27ac_101823	0.0781734	0
HS_H3K27ac_101824	0.115702	0
HS_H3K27ac_101835	0.218909	0
HS_H3K27ac_101836	0.127693	0
HS_H3K27ac_101837	0.0888139	0
HS_H3K27ac_101838	0.113786	0
HS_H3K27ac_101848	0.0749766	0
HS_H3K27ac_101849	0.263925	0
HS_H3K27ac_101850	0.0984456	1
HS_H3K27ac_101853	0.114625	1
HS_H3K27ac_101854	0.134902	0
HS_H3K27ac_101856	0.105298	0
HS_H3K27ac_101858	0.0968523	0
HS_H3K27ac_101859	0.657314	0
HS_H3K27ac_101864	0.512968	0
HS_H3K27ac_101866	0.108315	0
HS_H3K27ac_101867	0.125375	0
HS_H3K27ac_101872	0.0491954	0
HS_H3K27ac_101873	0.101751	0
HS_H3K27ac_101875	0.119639	0
HS_H3K27ac_101876	0.0970732	0
HS_H3K27ac_101877	0.0826978	0
HS_H3K27ac_101878	0.112856	0
HS_H3K27ac_101880	0.0906026	0
HS_H3K27ac_101881	0.119816	0
HS_H3K27ac_101882	0.059107	0
HS_H3K27ac_101883	0.112457	0
HS_H3K27ac_101884	0.103499	0
HS_H3K27ac_101888	0.0849985	0
HS_H3K27ac_101889	0.162071	0
HS_H3K27ac_101890	0.168627	0
HS_H3K27ac_101891	0.108776	0
HS_H3K27ac_101892	0.120854	1
HS_H3K27ac_101893	0.0883552	0
HS_H3K27ac_101901	0.141831	0
HS_H3K27ac_101909	0.127285	0
HS_H3K27ac_10191	0.115789	0
HS_H3K27ac_101911	0.129707	0
HS_H3K27ac_101913	0.104592	0
HS_H3K27ac_101914	0.122051	0
HS_H3K27ac_101915	0.106211	0
HS_H3K27ac_101916	0.120239	0
HS_H3K27ac_101919	0.109636	0
HS_H3K27ac_101922	0.131296	0
HS_H3K27ac_101923	0.119546	0
HS_H3K27ac_101924	0.142207	0
HS_H3K27ac_101926	0.113071	0
HS_H3K27ac_101929	0.142771	0
HS_H3K27ac_101932	0.115116	0
HS_H3K27ac_101933	0.108923	0
HS_H3K27ac_101934	0.104651	0
HS_H3K27ac_101935	0.148515	0
HS_H3K27ac_101936	0.145669	0
HS_H3K27ac_101937	0.112795	0
HS_H3K27ac_101939	0.206067	0
HS_H3K27ac_10194	0.111181	0
HS_H3K27ac_101940	0.113692	0
HS_H3K27ac_101945	0.136542	0
HS_H3K27ac_101947	0.135246	1
HS_H3K27ac_101948	0.108974	0
HS_H3K27ac_101949	0.117265	0
HS_H3K27ac_10196	0.115399	0
HS_H3K27ac_101962	0.145883	0
HS_H3K27ac_101963	0.13616	0
HS_H3K27ac_10197	0.0966628	0
HS_H3K27ac_101976	0.107494	0
HS_H3K27ac_101977	0.122934	0
HS_H3K27ac_10198	0.13444	1
HS_H3K27ac_10199	0.123211	0
HS_H3K27ac_102000	0.121832	0
HS_H3K27ac_102001	0.110333	0
HS_H3K27ac_102004	0.0595393	0
HS_H3K27ac_10201	0.135046	0
HS_H3K27ac_102012	0.121648	0
HS_H3K27ac_102013	0.0932032	0
HS_H3K27ac_102014	0.0915189	0
HS_H3K27ac_102015	0.10666	0
HS_H3K27ac_102016	0.0935162	0
HS_H3K27ac_102019	0.0784708	0
HS_H3K27ac_102027	0.0715406	0
HS_H3K27ac_102028	0.1	0
HS_H3K27ac_102035	0.111919	0
HS_H3K27ac_102036	0.131346	0
HS_H3K27ac_102038	0.125451	0
HS_H3K27ac_102039	0.29002	0
HS_H3K27ac_102041	0.0975731	0
HS_H3K27ac_102042	0.102002	0
HS_H3K27ac_102043	0.121155	0
HS_H3K27ac_102044	0.138148	0
HS_H3K27ac_102045	0.158656	0
HS_H3K27ac_102046	0.144246	0
HS_H3K27ac_102047	0.1139	0
HS_H3K27ac_102048	0.104451	0
HS_H3K27ac_102049	0.119036	0
HS_H3K27ac_10206	0.218805	0
HS_H3K27ac_102063	0.15034	0
HS_H3K27ac_10207	0.0754491	0
HS_H3K27ac_102071	0.104379	0
HS_H3K27ac_102072	0.125448	0
HS_H3K27ac_102073	0.114754	0
HS_H3K27ac_102074	0.125128	0
HS_H3K27ac_102075	0.152071	0
HS_H3K27ac_102076	0.114923	0
HS_H3K27ac_102077	0.127371	0
HS_H3K27ac_102078	0.305218	1
HS_H3K27ac_10208	0.0814006	0
HS_H3K27ac_102080	0.153298	0
HS_H3K27ac_102081	0.119079	0
HS_H3K27ac_102082	0.125356	0
HS_H3K27ac_102083	0.0945596	0
HS_H3K27ac_102084	0.106979	0
HS_H3K27ac_102085	0.0886329	0
HS_H3K27ac_102087	0.11019	0
HS_H3K27ac_102089	0.143139	0
HS_H3K27ac_10209	0.112566	0
HS_H3K27ac_102099	0.115099	0
HS_H3K27ac_102104	0.117297	0
HS_H3K27ac_102108	0.124334	0
HS_H3K27ac_10211	0.0730572	0
HS_H3K27ac_102115	0.13523	0
HS_H3K27ac_102118	0.11968	0
HS_H3K27ac_102119	0.133745	0
HS_H3K27ac_10212	0.0613208	0
HS_H3K27ac_102123	0.22516	0
HS_H3K27ac_102126	0.123524	0
HS_H3K27ac_102127	0.1072	0
HS_H3K27ac_102128	0.232018	0
HS_H3K27ac_10213	0.114663	0
HS_H3K27ac_102132	0.0737527	1
HS_H3K27ac_102133	0.0993842	0
HS_H3K27ac_102135	0.119134	0
HS_H3K27ac_102136	0.110672	0
HS_H3K27ac_10214	0.118365	0
HS_H3K27ac_102141	0.191774	0
HS_H3K27ac_102142	0.100746	0
HS_H3K27ac_102143	0.142765	0
HS_H3K27ac_102144	0.111163	0
HS_H3K27ac_102145	0.145625	0
HS_H3K27ac_10215	0.111829	0
HS_H3K27ac_102159	0.125996	0
HS_H3K27ac_10216	0.08031	0
HS_H3K27ac_102160	0.108207	0
HS_H3K27ac_102161	0.113975	0
HS_H3K27ac_102164	0.105161	0
HS_H3K27ac_102166	0.128308	0
HS_H3K27ac_102168	0.152966	0
HS_H3K27ac_102169	0.130157	0
HS_H3K27ac_10217	0.0800395	0
HS_H3K27ac_102170	0.12379	0
HS_H3K27ac_102171	0.126246	0
HS_H3K27ac_102172	0.12987	0
HS_H3K27ac_102174	0.112456	0
HS_H3K27ac_102175	0.109756	0
HS_H3K27ac_102176	0.136402	0
HS_H3K27ac_102177	0.100752	0
HS_H3K27ac_10218	0.0510678	0
HS_H3K27ac_102187	0.118747	0
HS_H3K27ac_102189	0.105023	0
HS_H3K27ac_10219	0.10668	0
HS_H3K27ac_102190	0.0907542	0
HS_H3K27ac_102191	0.101695	0
HS_H3K27ac_102192	0.101335	0
HS_H3K27ac_102194	0.104612	0
HS_H3K27ac_102195	0.21518	0
HS_H3K27ac_102197	0.164497	0
HS_H3K27ac_10220	0.103885	0
HS_H3K27ac_102200	0.103316	0
HS_H3K27ac_102205	0.139553	0
HS_H3K27ac_102207	0.140998	0
HS_H3K27ac_102208	0.137597	0
HS_H3K27ac_102209	0.151169	0
HS_H3K27ac_102214	0.121245	0
HS_H3K27ac_102217	0.132927	0
HS_H3K27ac_102219	0.123156	1
HS_H3K27ac_102221	0.137333	0
HS_H3K27ac_102227	0.166831	0
HS_H3K27ac_102228	0.117032	1
HS_H3K27ac_102229	0.0772317	1
HS_H3K27ac_102230	0.146953	0
HS_H3K27ac_102231	0.117207	0
HS_H3K27ac_102235	0.0987713	0
HS_H3K27ac_10224	0.117059	0
HS_H3K27ac_10225	0.116232	0
HS_H3K27ac_102252	0.3964	0
HS_H3K27ac_10226	0.0901639	0
HS_H3K27ac_10227	0.105691	0
HS_H3K27ac_102276	0.145586	0
HS_H3K27ac_10228	0.063059	0
HS_H3K27ac_102287	0.151466	0
HS_H3K27ac_102288	0.211276	0
HS_H3K27ac_102289	0.195827	0
HS_H3K27ac_10229	0.0936396	0
HS_H3K27ac_102291	0.169187	0
HS_H3K27ac_102292	0.17839	0
HS_H3K27ac_102293	0.13035	0
HS_H3K27ac_102295	0.141624	0
HS_H3K27ac_102299	0.14433	0
HS_H3K27ac_10230	0.121012	0
HS_H3K27ac_102300	0.141065	0
HS_H3K27ac_102304	0.153756	0
HS_H3K27ac_102305	0.111391	0
HS_H3K27ac_102306	0.151515	0
HS_H3K27ac_102307	0.134209	0
HS_H3K27ac_102309	0.120598	0
HS_H3K27ac_10231	0.125287	0
HS_H3K27ac_102310	0.327969	0
HS_H3K27ac_102311	0.314067	0
HS_H3K27ac_102312	0.164593	0
HS_H3K27ac_10232	0.125	0
HS_H3K27ac_102340	0.162508	0
HS_H3K27ac_102341	0.113836	0
HS_H3K27ac_102342	0.151584	0
HS_H3K27ac_102364	0.114548	0
HS_H3K27ac_102365	0.10725	0
HS_H3K27ac_102382	0.0707148	0
HS_H3K27ac_102384	0.10295	0
HS_H3K27ac_102385	0.0809524	1
HS_H3K27ac_102386	0.0900071	0
HS_H3K27ac_102387	0.124721	0
HS_H3K27ac_102391	0.131955	0
HS_H3K27ac_102392	0.113189	0
HS_H3K27ac_102393	0.102382	0
HS_H3K27ac_102398	0.0477742	0
HS_H3K27ac_102408	0.091629	0
HS_H3K27ac_102417	0.0986908	0
HS_H3K27ac_102418	0.084308	0
HS_H3K27ac_102420	0.0885029	0
HS_H3K27ac_102422	0.102062	0
HS_H3K27ac_102427	0.0838188	0
HS_H3K27ac_102431	0.102251	0
HS_H3K27ac_102432	0.0975024	0
HS_H3K27ac_102435	0.119689	0
HS_H3K27ac_102436	0.0676752	1
HS_H3K27ac_102437	0.155432	0
HS_H3K27ac_102462	0.115783	1
HS_H3K27ac_102468	0.102465	0
HS_H3K27ac_102469	0.124383	0
HS_H3K27ac_102470	0.123348	1
HS_H3K27ac_102471	0.111864	0
HS_H3K27ac_102473	0.118425	0
HS_H3K27ac_102476	0.130062	0
HS_H3K27ac_102478	0.130845	0
HS_H3K27ac_10248	0.129412	0
HS_H3K27ac_102488	0.123288	0
HS_H3K27ac_102489	0.0876931	0
HS_H3K27ac_10249	0.112846	0
HS_H3K27ac_102490	0.131551	1
HS_H3K27ac_102491	0.113391	0
HS_H3K27ac_102492	0.109551	0
HS_H3K27ac_102493	0.219772	0
HS_H3K27ac_102495	0.115602	0
HS_H3K27ac_102497	0.096319	0
HS_H3K27ac_102499	0.112856	0
HS_H3K27ac_102500	0.118678	0
HS_H3K27ac_102501	0.109135	0
HS_H3K27ac_102502	0.0991903	0
HS_H3K27ac_102503	0.122829	0
HS_H3K27ac_102506	0.102275	0
HS_H3K27ac_102508	0.117262	0
HS_H3K27ac_102509	0.128623	0
HS_H3K27ac_102511	0.0844794	0
HS_H3K27ac_102514	0.12822	0
HS_H3K27ac_102516	0.157244	0
HS_H3K27ac_102518	0.117647	0
HS_H3K27ac_102519	0.0983264	0
HS_H3K27ac_102521	0.106594	0
HS_H3K27ac_102522	0.112965	0
HS_H3K27ac_102523	0.118301	0
HS_H3K27ac_102525	0.119616	0
HS_H3K27ac_102527	0.10977	0
HS_H3K27ac_102528	0.118209	0
HS_H3K27ac_102529	0.113256	0
HS_H3K27ac_102531	0.0927625	0
HS_H3K27ac_102532	0.109085	0
HS_H3K27ac_102544	0.0913677	0
HS_H3K27ac_102545	0.106257	0
HS_H3K27ac_102546	0.123271	0
HS_H3K27ac_102550	0.101053	0
HS_H3K27ac_102551	0.112513	0
HS_H3K27ac_102552	0.1162	0
HS_H3K27ac_102553	0.115236	0
HS_H3K27ac_102554	0.0949586	0
HS_H3K27ac_102556	0.0876513	0
HS_H3K27ac_102557	0.0903756	0
HS_H3K27ac_102558	0.107204	0
HS_H3K27ac_102560	0.098813	0
HS_H3K27ac_102562	0.104232	0
HS_H3K27ac_102564	0.110872	0
HS_H3K27ac_10257	0.136033	1
HS_H3K27ac_102572	0.14117	0
HS_H3K27ac_102575	0.0967742	0
HS_H3K27ac_102577	0.131491	0
HS_H3K27ac_10258	0.108989	0
HS_H3K27ac_102580	0.119671	0
HS_H3K27ac_102581	0.111691	0
HS_H3K27ac_102582	0.102362	0
HS_H3K27ac_102583	0.132066	0
HS_H3K27ac_102585	0.103166	0
HS_H3K27ac_102588	0.222977	0
HS_H3K27ac_102589	0.118616	0
HS_H3K27ac_10259	0.0958809	0
HS_H3K27ac_102593	0.130878	0
HS_H3K27ac_102597	0.143284	0
HS_H3K27ac_1026	0.158963	0
HS_H3K27ac_102600	0.113237	0
HS_H3K27ac_102602	0.145759	0
HS_H3K27ac_102603	0.101124	0
HS_H3K27ac_102604	0.130776	0
HS_H3K27ac_10261	0.340059	0
HS_H3K27ac_102612	0.102401	0
HS_H3K27ac_102615	0.122222	0
HS_H3K27ac_102616	0.122783	0
HS_H3K27ac_10262	0.0859781	0
HS_H3K27ac_102623	0.289178	0
HS_H3K27ac_102629	0.105034	0
HS_H3K27ac_10263	0.10749	0
HS_H3K27ac_102632	0.0959707	0
HS_H3K27ac_102634	0.120813	0
HS_H3K27ac_102635	0.136264	0
HS_H3K27ac_102638	0.129116	0
HS_H3K27ac_102639	0.113317	0
HS_H3K27ac_10264	0.116893	0
HS_H3K27ac_102640	0.0729927	0
HS_H3K27ac_102647	0.112304	0
HS_H3K27ac_10266	0.12724	0
HS_H3K27ac_102662	0.106992	0
HS_H3K27ac_10267	0.107994	0
HS_H3K27ac_10268	0.0714286	0
HS_H3K27ac_10269	0.12063	0
HS_H3K27ac_102691	0.122134	0
HS_H3K27ac_102692	0.128045	0
HS_H3K27ac_102696	0.117286	0
HS_H3K27ac_10270	0.0909953	0
HS_H3K27ac_102701	0.127348	0
HS_H3K27ac_102706	0.0880713	0
HS_H3K27ac_10271	0.114699	0
HS_H3K27ac_102714	0.335684	0
HS_H3K27ac_102717	0.0969817	0
HS_H3K27ac_102718	0.111601	1
HS_H3K27ac_102728	0.0845259	0
HS_H3K27ac_102730	0.10142	0
HS_H3K27ac_102731	0.579528	0
HS_H3K27ac_102732	0.0985127	0
HS_H3K27ac_10274	0.115307	0
HS_H3K27ac_102746	0.113267	0
HS_H3K27ac_102747	0.108568	0
HS_H3K27ac_102758	0.233959	0
HS_H3K27ac_102760	0.141494	0
HS_H3K27ac_102762	0.0890869	0
HS_H3K27ac_102763	0.0832502	0
HS_H3K27ac_102764	0.13059	0
HS_H3K27ac_102766	0.0754281	0
HS_H3K27ac_102770	0.114545	0
HS_H3K27ac_102772	0.203838	0
HS_H3K27ac_102775	0.10184	1
HS_H3K27ac_102785	0.109185	0
HS_H3K27ac_10280	0.120546	0
HS_H3K27ac_102802	0.122609	0
HS_H3K27ac_10281	0.0694915	0
HS_H3K27ac_102817	0.0998991	0
HS_H3K27ac_102818	0.109145	0
HS_H3K27ac_102819	0.15815	0
HS_H3K27ac_10282	0.0609874	0
HS_H3K27ac_10283	0.0302045	0
HS_H3K27ac_102836	0.0975342	0
HS_H3K27ac_102837	0.173913	1
HS_H3K27ac_102838	0.114486	1
HS_H3K27ac_102839	0.0832562	0
HS_H3K27ac_10284	0.124181	0
HS_H3K27ac_102840	0.111391	0
HS_H3K27ac_102842	0.135367	0
HS_H3K27ac_102843	0.0956379	0
HS_H3K27ac_102854	0.107653	0
HS_H3K27ac_102860	0.107	0
HS_H3K27ac_102862	0.0999225	0
HS_H3K27ac_10287	0.117834	0
HS_H3K27ac_102872	0.0877691	0
HS_H3K27ac_102875	0.0965001	0
HS_H3K27ac_102882	0.145338	0
HS_H3K27ac_102883	0.247273	0
HS_H3K27ac_102884	0.123585	0
HS_H3K27ac_102886	0.111074	0
HS_H3K27ac_10289	0.117354	0
HS_H3K27ac_102905	0.150047	0
HS_H3K27ac_10291	0.12996	0
HS_H3K27ac_102910	0.100556	0
HS_H3K27ac_102911	0.167331	0
HS_H3K27ac_102913	0.119653	0
HS_H3K27ac_102914	0.076087	1
HS_H3K27ac_102917	0.0666667	0
HS_H3K27ac_102919	0.121062	0
HS_H3K27ac_10292	0.121748	0
HS_H3K27ac_102920	0.111573	0
HS_H3K27ac_102925	0.12982	0
HS_H3K27ac_102926	0.133389	0
HS_H3K27ac_102929	0.0859073	1
HS_H3K27ac_10293	0.101648	0
HS_H3K27ac_102930	0.0973025	0
HS_H3K27ac_102933	0.157471	0
HS_H3K27ac_102934	0.0582547	0
HS_H3K27ac_102937	0.109161	0
HS_H3K27ac_102939	0.0675916	0
HS_H3K27ac_10294	0.132017	0
HS_H3K27ac_102940	0.0713791	0
HS_H3K27ac_102944	0.0738512	0
HS_H3K27ac_102945	0.117429	0
HS_H3K27ac_102947	0.0585027	0
HS_H3K27ac_102949	0.0631266	0
HS_H3K27ac_102951	0.06158	0
HS_H3K27ac_102954	0.0701928	0
HS_H3K27ac_102958	0.0938564	0
HS_H3K27ac_102963	0.0794678	0
HS_H3K27ac_102965	0.100719	0
HS_H3K27ac_102966	0.0753319	0
HS_H3K27ac_102969	0.0909091	0
HS_H3K27ac_102971	0.139012	0
HS_H3K27ac_102973	0.101222	0
HS_H3K27ac_102974	0.108258	1
HS_H3K27ac_10299	0.0939227	0
HS_H3K27ac_103012	0.104528	0
HS_H3K27ac_103013	0.100338	0
HS_H3K27ac_103014	0.0910023	0
HS_H3K27ac_103016	0.088017	0
HS_H3K27ac_103017	0.0682566	0
HS_H3K27ac_103023	0.0791971	0
HS_H3K27ac_103034	0.089008	0
HS_H3K27ac_103044	0.111435	0
HS_H3K27ac_103051	0.0956429	0
HS_H3K27ac_103055	0.0669811	0
HS_H3K27ac_103057	0.11655	0
HS_H3K27ac_103058	0.0893023	1
HS_H3K27ac_103059	0.115596	0
HS_H3K27ac_103060	0.0867095	0
HS_H3K27ac_103067	0.0858086	0
HS_H3K27ac_103068	0.100465	0
HS_H3K27ac_103069	0.0558511	0
HS_H3K27ac_10307	0.111575	0
HS_H3K27ac_103070	0.0659382	0
HS_H3K27ac_103071	0.090999	0
HS_H3K27ac_103072	0.190588	0
HS_H3K27ac_103073	0.0840379	0
HS_H3K27ac_103076	0.364721	0
HS_H3K27ac_103077	0.103586	0
HS_H3K27ac_103078	0.146199	0
HS_H3K27ac_103079	0.084692	0
HS_H3K27ac_10308	0.0948404	0
HS_H3K27ac_103081	0.108161	0
HS_H3K27ac_103084	0.122571	0
HS_H3K27ac_103085	0.0778555	0
HS_H3K27ac_10310	0.104788	0
HS_H3K27ac_10311	0.110063	1
HS_H3K27ac_103116	0.0909458	0
HS_H3K27ac_10312	0.122189	0
HS_H3K27ac_103122	0.128682	0
HS_H3K27ac_103123	0.107636	0
HS_H3K27ac_103130	0.100467	0
HS_H3K27ac_103131	0.222405	0
HS_H3K27ac_103134	0.135943	0
HS_H3K27ac_103138	0.0910176	0
HS_H3K27ac_10314	0.113542	0
HS_H3K27ac_103147	0.622222	1
HS_H3K27ac_103148	0.0923361	0
HS_H3K27ac_103153	0.084596	0
HS_H3K27ac_103155	0.121339	0
HS_H3K27ac_103156	0.0980365	0
HS_H3K27ac_103159	0.295886	0
HS_H3K27ac_10316	0.112983	0
HS_H3K27ac_103160	0.18502	0
HS_H3K27ac_103161	0.0869235	0
HS_H3K27ac_103162	0.0843758	0
HS_H3K27ac_103165	0.0822723	0
HS_H3K27ac_103166	0.0921215	0
HS_H3K27ac_103172	0.0868946	0
HS_H3K27ac_103173	0.170272	0
HS_H3K27ac_103178	0.0963067	0
HS_H3K27ac_103179	0.112256	0
HS_H3K27ac_10318	0.231627	0
HS_H3K27ac_103181	0.0886918	0
HS_H3K27ac_103183	0.106383	0
HS_H3K27ac_103185	0.115052	0
HS_H3K27ac_103187	0.26231	0
HS_H3K27ac_10319	0.149091	0
HS_H3K27ac_103190	0.103792	0
HS_H3K27ac_103191	0.101287	0
HS_H3K27ac_103193	0.101889	0
HS_H3K27ac_103194	0.117563	0
HS_H3K27ac_103195	0.115535	0
HS_H3K27ac_103196	0.110774	0
HS_H3K27ac_103197	0.104427	0
HS_H3K27ac_103200	0.16543	0
HS_H3K27ac_103202	0.109302	0
HS_H3K27ac_103206	0.0986767	0
HS_H3K27ac_103208	0.121053	0
HS_H3K27ac_10321	0.108166	0
HS_H3K27ac_103213	0.0857527	0
HS_H3K27ac_103216	0.10532	0
HS_H3K27ac_103217	0.116641	0
HS_H3K27ac_103218	0.104187	0
HS_H3K27ac_103219	0.102576	0
HS_H3K27ac_10322	0.128984	0
HS_H3K27ac_103221	0.0884004	0
HS_H3K27ac_103222	0.356412	0
HS_H3K27ac_103223	0.107639	0
HS_H3K27ac_103225	0.0988024	0
HS_H3K27ac_103226	0.118001	0
HS_H3K27ac_103227	0.268279	0
HS_H3K27ac_103228	0.108531	0
HS_H3K27ac_103229	0.234066	0
HS_H3K27ac_10323	0.125352	1
HS_H3K27ac_103232	0.111937	0
HS_H3K27ac_103233	0.106164	0
HS_H3K27ac_103234	0.0940939	0
HS_H3K27ac_103238	0.1139	0
HS_H3K27ac_103239	0.121938	0
HS_H3K27ac_10324	0.113394	0
HS_H3K27ac_103242	0.115251	0
HS_H3K27ac_103243	0.108687	0
HS_H3K27ac_103245	0.105053	0
HS_H3K27ac_103246	0.117056	0
HS_H3K27ac_103248	0.117691	0
HS_H3K27ac_10325	0.110334	0
HS_H3K27ac_103250	0.126384	0
HS_H3K27ac_103251	0.126873	0
HS_H3K27ac_103252	0.134002	0
HS_H3K27ac_103253	0.133333	0
HS_H3K27ac_103254	0.113776	0
HS_H3K27ac_103255	0.10266	0
HS_H3K27ac_103257	0.111328	0
HS_H3K27ac_10326	0.1263	0
HS_H3K27ac_103261	0.100076	0
HS_H3K27ac_103262	0.102761	0
HS_H3K27ac_103264	0.159584	0
HS_H3K27ac_10327	0.115768	0
HS_H3K27ac_103272	0.105217	0
HS_H3K27ac_103276	0.0925547	0
HS_H3K27ac_103277	0.120206	0
HS_H3K27ac_103278	0.117134	0
HS_H3K27ac_103279	0.093494	0
HS_H3K27ac_103280	0.108478	0
HS_H3K27ac_103282	0.141066	0
HS_H3K27ac_10329	0.101343	0
HS_H3K27ac_103290	0.0382166	0
HS_H3K27ac_103291	0.0899576	0
HS_H3K27ac_103292	0.130853	0
HS_H3K27ac_103293	0.128255	0
HS_H3K27ac_103294	0.106354	0
HS_H3K27ac_10330	0.0882182	0
HS_H3K27ac_103300	0.0965309	0
HS_H3K27ac_103301	0.051147	0
HS_H3K27ac_103302	0.172314	0
HS_H3K27ac_103305	0.0980545	0
HS_H3K27ac_103308	0.100943	0
HS_H3K27ac_103309	0.0990991	0
HS_H3K27ac_10331	0.102288	0
HS_H3K27ac_103311	0.101898	0
HS_H3K27ac_103314	0.103764	0
HS_H3K27ac_103315	0.127451	0
HS_H3K27ac_103316	0.101794	0
HS_H3K27ac_103317	0.101679	0
HS_H3K27ac_103318	0.1216	0
HS_H3K27ac_103319	0.104282	0
HS_H3K27ac_10332	0.108401	0
HS_H3K27ac_103327	0.0825147	0
HS_H3K27ac_103339	0.0759595	0
HS_H3K27ac_103345	0.0896027	0
HS_H3K27ac_103347	0.101585	0
HS_H3K27ac_10335	0.115477	0
HS_H3K27ac_103355	0.0929814	0
HS_H3K27ac_103359	0.0948999	0
HS_H3K27ac_10336	0.0880182	0
HS_H3K27ac_103360	0.161628	1
HS_H3K27ac_103361	0.102691	0
HS_H3K27ac_103362	0.140709	0
HS_H3K27ac_103363	0.136297	0
HS_H3K27ac_103364	0.121713	0
HS_H3K27ac_103365	0.126006	0
HS_H3K27ac_103368	0.116422	0
HS_H3K27ac_103369	0.130119	1
HS_H3K27ac_10337	0.122327	0
HS_H3K27ac_103370	0.146067	0
HS_H3K27ac_103371	0.143457	0
HS_H3K27ac_103373	0.126482	0
HS_H3K27ac_103375	0.130231	0
HS_H3K27ac_103381	0.115011	0
HS_H3K27ac_10339	0.271739	0
HS_H3K27ac_103390	0.125105	0
HS_H3K27ac_103391	0.116048	0
HS_H3K27ac_103395	0.145272	0
HS_H3K27ac_103396	0.111593	0
HS_H3K27ac_103397	0.107179	0
HS_H3K27ac_103398	0.101941	0
HS_H3K27ac_103400	0.159937	0
HS_H3K27ac_103401	0.0970677	0
HS_H3K27ac_103402	0.0915989	0
HS_H3K27ac_103403	0.108171	0
HS_H3K27ac_103405	0.114065	0
HS_H3K27ac_103406	0.121615	0
HS_H3K27ac_103407	0.125	0
HS_H3K27ac_103409	0.111855	0
HS_H3K27ac_10341	0.123196	1
HS_H3K27ac_103410	0.100719	0
HS_H3K27ac_103411	0.110553	0
HS_H3K27ac_103412	0.344118	0
HS_H3K27ac_103413	0.131228	0
HS_H3K27ac_103418	0.118346	0
HS_H3K27ac_10342	0.104029	0
HS_H3K27ac_103424	0.087538	0
HS_H3K27ac_103425	0.0962274	0
HS_H3K27ac_103426	0.159425	0
HS_H3K27ac_103428	0.120759	0
HS_H3K27ac_103433	0.1167	0
HS_H3K27ac_103442	0.0951017	0
HS_H3K27ac_103444	0.133082	0
HS_H3K27ac_103445	0.127845	0
HS_H3K27ac_103446	0.116737	0
HS_H3K27ac_103447	0.11465	0
HS_H3K27ac_103448	0.112494	0
HS_H3K27ac_103452	0.211501	0
HS_H3K27ac_103456	0.108518	0
HS_H3K27ac_103457	0.0899428	0
HS_H3K27ac_103458	0.119619	0
HS_H3K27ac_10346	0.127805	0
HS_H3K27ac_103460	0.0929662	0
HS_H3K27ac_103463	0.115327	0
HS_H3K27ac_103465	0.129011	0
HS_H3K27ac_10347	0.11029	0
HS_H3K27ac_103470	0.124632	0
HS_H3K27ac_103472	0.11251	0
HS_H3K27ac_103473	0.159163	0
HS_H3K27ac_10348	0.0928571	0
HS_H3K27ac_103484	0.11469	0
HS_H3K27ac_103486	0.122369	0
HS_H3K27ac_103488	0.10662	0
HS_H3K27ac_103489	0.215467	0
HS_H3K27ac_10349	0.101071	0
HS_H3K27ac_103490	0.116494	0
HS_H3K27ac_103491	0.114422	0
HS_H3K27ac_103495	0.14734	0
HS_H3K27ac_103496	0.129824	0
HS_H3K27ac_103499	0.105769	0
HS_H3K27ac_103500	0.107112	0
HS_H3K27ac_103501	0.0986752	0
HS_H3K27ac_103502	0.107438	0
HS_H3K27ac_103505	0.106154	0
HS_H3K27ac_103506	0.112178	0
HS_H3K27ac_103531	0.105884	0
HS_H3K27ac_103536	0.129934	0
HS_H3K27ac_103537	0.129355	0
HS_H3K27ac_103539	0.0848279	0
HS_H3K27ac_103540	0.121656	0
HS_H3K27ac_103557	0.111934	0
HS_H3K27ac_10356	0.119266	0
HS_H3K27ac_10357	0.0946237	1
HS_H3K27ac_103574	0.0798771	0
HS_H3K27ac_103575	0.0372439	0
HS_H3K27ac_103576	0.134677	0
HS_H3K27ac_103578	0.117155	0
HS_H3K27ac_103579	0.130972	0
HS_H3K27ac_10358	0.075	0
HS_H3K27ac_103580	0.140682	0
HS_H3K27ac_103583	0.108003	0
HS_H3K27ac_103584	0.13253	0
HS_H3K27ac_103586	0.129417	0
HS_H3K27ac_103589	0.115297	0
HS_H3K27ac_103590	0.30117	0
HS_H3K27ac_103591	0.273902	0
HS_H3K27ac_103609	0.106481	0
HS_H3K27ac_103614	0.143421	0
HS_H3K27ac_103617	0.123934	0
HS_H3K27ac_103633	0.120448	0
HS_H3K27ac_103634	0.120137	0
HS_H3K27ac_103635	0.117252	0
HS_H3K27ac_103636	0.0965035	0
HS_H3K27ac_103637	0.118602	0
HS_H3K27ac_103638	0.117605	0
HS_H3K27ac_103639	0.119403	0
HS_H3K27ac_103641	0.100101	0
HS_H3K27ac_103642	0.115836	0
HS_H3K27ac_103643	0.109421	0
HS_H3K27ac_103644	0.148264	0
HS_H3K27ac_103648	0.114818	0
HS_H3K27ac_103654	0.124672	0
HS_H3K27ac_103656	0.115955	0
HS_H3K27ac_103657	0.128907	0
HS_H3K27ac_103660	0.109931	0
HS_H3K27ac_103663	0.0932735	0
HS_H3K27ac_103666	0.110776	0
HS_H3K27ac_103667	0.113338	0
HS_H3K27ac_103669	0.222115	0
HS_H3K27ac_103670	0.199345	0
HS_H3K27ac_103673	0.120283	0
HS_H3K27ac_103674	0.172875	0
HS_H3K27ac_10368	0.10241	0
HS_H3K27ac_10369	0.109986	0
HS_H3K27ac_103698	0.131965	0
HS_H3K27ac_103699	0.113626	0
HS_H3K27ac_10370	0.119354	0
HS_H3K27ac_103700	0.0778926	0
HS_H3K27ac_103703	0.109222	0
HS_H3K27ac_103704	0.117265	0
HS_H3K27ac_103705	0.1311	0
HS_H3K27ac_103706	0.120898	0
HS_H3K27ac_103707	0.0879121	0
HS_H3K27ac_103708	0.12276	0
HS_H3K27ac_103709	0.071364	0
HS_H3K27ac_10371	0.116524	0
HS_H3K27ac_103710	0.107527	0
HS_H3K27ac_103711	0.10521	0
HS_H3K27ac_103712	0.14155	0
HS_H3K27ac_103713	0.12345	0
HS_H3K27ac_103714	0.106134	0
HS_H3K27ac_103715	0.105442	0
HS_H3K27ac_103716	0.119168	0
HS_H3K27ac_103717	0.0749761	0
HS_H3K27ac_103718	0.0835339	0
HS_H3K27ac_10372	0.122487	0
HS_H3K27ac_103720	0.121856	0
HS_H3K27ac_103721	0.12136	0
HS_H3K27ac_103725	0.095606	0
HS_H3K27ac_103726	0.118085	0
HS_H3K27ac_10373	0.106838	0
HS_H3K27ac_103730	0.126	0
HS_H3K27ac_103732	0.524182	0
HS_H3K27ac_103735	0.15454	0
HS_H3K27ac_103737	0.133663	0
HS_H3K27ac_103738	0.1167	0
HS_H3K27ac_103739	0.0948905	0
HS_H3K27ac_103740	0.122665	0
HS_H3K27ac_103741	0.128262	0
HS_H3K27ac_103742	0.124715	0
HS_H3K27ac_103743	0.143744	0
HS_H3K27ac_103745	0.122254	0
HS_H3K27ac_103746	0.104515	0
HS_H3K27ac_103747	0.114268	0
HS_H3K27ac_103749	0.128631	0
HS_H3K27ac_103752	0.0831365	0
HS_H3K27ac_103753	0.0899146	0
HS_H3K27ac_103755	0.0986442	0
HS_H3K27ac_103758	0.0858192	0
HS_H3K27ac_103759	0.0776471	0
HS_H3K27ac_10376	0.104539	0
HS_H3K27ac_103760	0.0922747	0
HS_H3K27ac_103761	0.0972364	0
HS_H3K27ac_103762	0.0950271	0
HS_H3K27ac_103763	0.139024	0
HS_H3K27ac_103764	0.313326	0
HS_H3K27ac_103766	0.103246	0
HS_H3K27ac_103767	0.113915	0
HS_H3K27ac_103769	0.265275	0
HS_H3K27ac_103771	0.0956804	0
HS_H3K27ac_103772	0.137334	0
HS_H3K27ac_103773	0.105128	0
HS_H3K27ac_103775	0.0950689	0
HS_H3K27ac_103776	0.101952	0
HS_H3K27ac_10378	0.109853	0
HS_H3K27ac_103781	0.119899	0
HS_H3K27ac_103782	0.0920479	0
HS_H3K27ac_103783	0.109009	0
HS_H3K27ac_103789	0.0770059	0
HS_H3K27ac_103790	0.156584	0
HS_H3K27ac_103795	0.103297	0
HS_H3K27ac_103796	0.0852323	0
HS_H3K27ac_103797	0.205816	0
HS_H3K27ac_103798	0.102564	0
HS_H3K27ac_103799	0.0896147	0
HS_H3K27ac_10380	0.118954	0
HS_H3K27ac_10381	0.120714	0
HS_H3K27ac_103818	0.120643	0
HS_H3K27ac_103819	0.127618	0
HS_H3K27ac_103820	0.110813	0
HS_H3K27ac_103822	0.123743	0
HS_H3K27ac_103823	0.101309	0
HS_H3K27ac_103824	0.117062	0
HS_H3K27ac_103825	0.118636	0
HS_H3K27ac_103826	0.119777	0
HS_H3K27ac_103827	0.097867	0
HS_H3K27ac_103829	0.10089	0
HS_H3K27ac_10383	0.115657	0
HS_H3K27ac_103830	0.0826211	0
HS_H3K27ac_103833	0.115141	0
HS_H3K27ac_103834	0.105542	0
HS_H3K27ac_103835	0.130649	0
HS_H3K27ac_103837	0.0946015	0
HS_H3K27ac_103838	0.0955696	0
HS_H3K27ac_103840	0.0941781	0
HS_H3K27ac_103842	0.109726	0
HS_H3K27ac_103843	0.113029	0
HS_H3K27ac_103846	0.105229	0
HS_H3K27ac_103848	0.105587	0
HS_H3K27ac_103849	0.095122	0
HS_H3K27ac_10385	0.114321	0
HS_H3K27ac_103850	0.116435	0
HS_H3K27ac_103852	0.0833333	0
HS_H3K27ac_103854	0.1994	0
HS_H3K27ac_103855	0.125161	0
HS_H3K27ac_103859	0.137089	0
HS_H3K27ac_103861	0.123468	0
HS_H3K27ac_103863	0.157283	0
HS_H3K27ac_103864	0.122159	0
HS_H3K27ac_103865	0.111467	0
HS_H3K27ac_103866	0.122137	0
HS_H3K27ac_103867	0.108199	0
HS_H3K27ac_103868	0.131099	0
HS_H3K27ac_103869	0.141723	0
HS_H3K27ac_103870	0.0967904	0
HS_H3K27ac_103873	0.0935789	0
HS_H3K27ac_103874	0.126738	0
HS_H3K27ac_103875	0.0923949	0
HS_H3K27ac_103876	0.0884855	0
HS_H3K27ac_103877	0.0875362	0
HS_H3K27ac_103878	0.0782281	0
HS_H3K27ac_103879	0.106796	0
HS_H3K27ac_10388	0.00865801	0
HS_H3K27ac_103880	0.138186	0
HS_H3K27ac_103881	0.119266	0
HS_H3K27ac_103882	0.120264	0
HS_H3K27ac_103883	0.10273	0
HS_H3K27ac_103885	0.101183	0
HS_H3K27ac_103888	0.103394	0
HS_H3K27ac_103889	0.121069	0
HS_H3K27ac_10389	0.0944249	0
HS_H3K27ac_103890	0.0970874	0
HS_H3K27ac_103895	0.128852	0
HS_H3K27ac_103896	0.130499	0
HS_H3K27ac_103907	0.151341	0
HS_H3K27ac_103908	0.123093	0
HS_H3K27ac_103913	0.114746	0
HS_H3K27ac_103917	0.0963185	0
HS_H3K27ac_103921	0.13154	0
HS_H3K27ac_103923	0.0646512	0
HS_H3K27ac_103924	0.105064	0
HS_H3K27ac_103926	0.0932511	0
HS_H3K27ac_103927	0.0867384	1
HS_H3K27ac_103928	0.0929313	0
HS_H3K27ac_103929	0.114055	0
HS_H3K27ac_103930	0.135343	0
HS_H3K27ac_103931	0.118367	0
HS_H3K27ac_103932	0.104384	0
HS_H3K27ac_103933	0.122228	0
HS_H3K27ac_103934	0.114087	0
HS_H3K27ac_103935	0.123485	0
HS_H3K27ac_103936	0.0622642	0
HS_H3K27ac_103945	0.0766677	0
HS_H3K27ac_103954	0.12922	0
HS_H3K27ac_103955	0.111301	0
HS_H3K27ac_103956	0.0951613	0
HS_H3K27ac_103957	0.0722781	0
HS_H3K27ac_103958	0.1067	0
HS_H3K27ac_103959	0.0764846	0
HS_H3K27ac_103961	0.0540541	0
HS_H3K27ac_103963	0.100351	0
HS_H3K27ac_103967	0.0752033	0
HS_H3K27ac_103968	0.114039	0
HS_H3K27ac_103970	0.101025	0
HS_H3K27ac_103971	0.101944	0
HS_H3K27ac_103972	0.0873528	0
HS_H3K27ac_103975	0.0570356	0
HS_H3K27ac_103977	0.111849	0
HS_H3K27ac_103978	0.103147	0
HS_H3K27ac_103981	0.081682	0
HS_H3K27ac_103982	0.0937871	0
HS_H3K27ac_103983	0.0963719	0
HS_H3K27ac_103984	0.0961722	0
HS_H3K27ac_103985	0.115702	0
HS_H3K27ac_103986	0.136318	0
HS_H3K27ac_103990	0.117754	0
HS_H3K27ac_103992	0.12888	0
HS_H3K27ac_103993	0.111495	0
HS_H3K27ac_103994	0.126153	0
HS_H3K27ac_103996	0.121839	0
HS_H3K27ac_103999	0.133958	0
HS_H3K27ac_104000	0.114233	0
HS_H3K27ac_104001	0.126443	0
HS_H3K27ac_104002	0.218903	0
HS_H3K27ac_104004	0.175174	0
HS_H3K27ac_104005	0.107754	0
HS_H3K27ac_104006	0.121387	0
HS_H3K27ac_104007	0.0932765	0
HS_H3K27ac_104008	0.113784	0
HS_H3K27ac_104009	0.0874165	0
HS_H3K27ac_104010	0.107413	0
HS_H3K27ac_104011	0.0970644	0
HS_H3K27ac_104012	0.108252	0
HS_H3K27ac_104013	0.112387	0
HS_H3K27ac_10402	0.125054	0
HS_H3K27ac_104027	0.122793	0
HS_H3K27ac_104028	0.0928758	0
HS_H3K27ac_104029	0.103431	0
HS_H3K27ac_10403	0.12562	0
HS_H3K27ac_104030	0.101403	0
HS_H3K27ac_104031	0.0833333	1
HS_H3K27ac_104032	0.100187	0
HS_H3K27ac_104033	0.0922297	0
HS_H3K27ac_104044	0.0805799	0
HS_H3K27ac_104045	0.0529101	0
HS_H3K27ac_104046	0.131606	0
HS_H3K27ac_104047	0.071131	0
HS_H3K27ac_104048	0.104806	0
HS_H3K27ac_104049	0.021097	0
HS_H3K27ac_10405	0.108491	0
HS_H3K27ac_104050	0.0725775	0
HS_H3K27ac_104051	0.0897436	0
HS_H3K27ac_104052	0.077147	0
HS_H3K27ac_104053	0.0817499	0
HS_H3K27ac_104054	0.084873	0
HS_H3K27ac_104055	0.0590211	0
HS_H3K27ac_104057	0.0774221	0
HS_H3K27ac_104058	0.167186	0
HS_H3K27ac_104059	0.0489596	0
HS_H3K27ac_104061	0.166103	0
HS_H3K27ac_104066	0.119034	0
HS_H3K27ac_104067	0.109028	0
HS_H3K27ac_104071	0.126111	0
HS_H3K27ac_104074	0.0911071	0
HS_H3K27ac_104075	0.117251	0
HS_H3K27ac_104080	0.0972862	0
HS_H3K27ac_104090	0.194097	0
HS_H3K27ac_104091	0.48773	0
HS_H3K27ac_104094	0.115729	0
HS_H3K27ac_10410	0.113464	0
HS_H3K27ac_104109	0.112838	0
HS_H3K27ac_104110	0.133179	0
HS_H3K27ac_104112	0.134084	0
HS_H3K27ac_104113	0.0979653	0
HS_H3K27ac_104115	0.105525	0
HS_H3K27ac_10412	0.0644851	0
HS_H3K27ac_104120	0.0852018	0
HS_H3K27ac_104121	0.125781	0
HS_H3K27ac_104122	0.195077	0
HS_H3K27ac_104123	0.115408	0
HS_H3K27ac_104124	0.13431	0
HS_H3K27ac_104125	0.101279	1
HS_H3K27ac_104131	0.0651379	0
HS_H3K27ac_104132	0.0907544	0
HS_H3K27ac_104133	0.0772414	0
HS_H3K27ac_104134	0.448822	0
HS_H3K27ac_104135	0.119757	0
HS_H3K27ac_104137	0.108122	0
HS_H3K27ac_104138	0.268617	0
HS_H3K27ac_104139	0.1274	0
HS_H3K27ac_10414	0.037594	0
HS_H3K27ac_104140	0.130666	0
HS_H3K27ac_10415	0.109542	0
HS_H3K27ac_10418	0.0994789	0
HS_H3K27ac_104182	0.154533	0
HS_H3K27ac_104184	0.283668	1
HS_H3K27ac_104187	0.154373	0
HS_H3K27ac_104188	0.132114	1
HS_H3K27ac_104190	0.144395	0
HS_H3K27ac_104194	0.106158	0
HS_H3K27ac_104195	0.148662	0
HS_H3K27ac_104205	0.1336	0
HS_H3K27ac_104207	0.118789	0
HS_H3K27ac_104226	0.147324	0
HS_H3K27ac_104230	0.0752625	0
HS_H3K27ac_104233	0.162596	0
HS_H3K27ac_104236	0.138279	0
HS_H3K27ac_10424	0.102691	0
HS_H3K27ac_104240	0.125971	0
HS_H3K27ac_104245	0.0853518	0
HS_H3K27ac_104250	0.143233	1
HS_H3K27ac_104251	0.139589	0
HS_H3K27ac_104269	0.167916	0
HS_H3K27ac_104279	0.417309	0
HS_H3K27ac_10428	0.218975	1
HS_H3K27ac_104284	0.120163	0
HS_H3K27ac_104285	0.143508	0
HS_H3K27ac_104286	0.105081	0
HS_H3K27ac_104287	0.0936255	0
HS_H3K27ac_104288	0.142941	0
HS_H3K27ac_104289	0.155376	0
HS_H3K27ac_10429	0.114913	0
HS_H3K27ac_104298	0.139023	0
HS_H3K27ac_104299	0.114825	1
HS_H3K27ac_10430	0.151168	0
HS_H3K27ac_104300	0.0621946	0
HS_H3K27ac_104301	0.123293	0
HS_H3K27ac_104302	0.0947368	0
HS_H3K27ac_104303	0.0877129	0
HS_H3K27ac_104304	0.100452	0
HS_H3K27ac_104309	0.149081	0
HS_H3K27ac_10431	0.162722	0
HS_H3K27ac_104315	0.112983	0
HS_H3K27ac_104318	0.12661	0
HS_H3K27ac_10432	0.139111	0
HS_H3K27ac_104320	0.109937	0
HS_H3K27ac_104323	0.155693	0
HS_H3K27ac_104330	0.109738	0
HS_H3K27ac_104336	0.119155	0
HS_H3K27ac_104338	0.142166	0
HS_H3K27ac_104339	0.0922034	0
HS_H3K27ac_10434	0.149845	0
HS_H3K27ac_104340	0.118899	0
HS_H3K27ac_104341	0.15081	0
HS_H3K27ac_104342	0.124334	0
HS_H3K27ac_104344	0.138578	0
HS_H3K27ac_104346	0.113527	0
HS_H3K27ac_104347	0.101702	0
HS_H3K27ac_104348	0.120618	0
HS_H3K27ac_104356	0.127057	0
HS_H3K27ac_104357	0.136049	0
HS_H3K27ac_10436	0.0955285	0
HS_H3K27ac_104360	0.126552	0
HS_H3K27ac_104361	0.180064	0
HS_H3K27ac_104364	0.147959	0
HS_H3K27ac_104370	0.120639	0
HS_H3K27ac_104371	0.104089	0
HS_H3K27ac_104372	0.118007	0
HS_H3K27ac_104373	0.113503	1
HS_H3K27ac_104375	0.140765	0
HS_H3K27ac_104377	0.0779703	0
HS_H3K27ac_104378	0.365904	0
HS_H3K27ac_104379	0.126458	0
HS_H3K27ac_104380	0.141399	0
HS_H3K27ac_104382	0.12	0
HS_H3K27ac_104385	0.290074	0
HS_H3K27ac_104390	0.120601	0
HS_H3K27ac_104391	0.316676	0
HS_H3K27ac_104393	0.0842857	0
HS_H3K27ac_104396	0.118006	0
HS_H3K27ac_104398	0.115692	0
HS_H3K27ac_104401	0.121407	0
HS_H3K27ac_104402	0.117099	0
HS_H3K27ac_104403	0.122759	0
HS_H3K27ac_104405	0.112831	0
HS_H3K27ac_104406	0.104189	0
HS_H3K27ac_104407	0.128062	0
HS_H3K27ac_104412	0.141085	0
HS_H3K27ac_104420	0.161665	0
HS_H3K27ac_104427	0.338682	0
HS_H3K27ac_104429	0.13992	1
HS_H3K27ac_104430	0.135052	0
HS_H3K27ac_104434	0.134982	0
HS_H3K27ac_104435	0.0981987	0
HS_H3K27ac_104436	0.107109	0
HS_H3K27ac_104437	0.15828	0
HS_H3K27ac_104438	0.142799	0
HS_H3K27ac_104439	0.130435	0
HS_H3K27ac_104440	0.117021	0
HS_H3K27ac_104446	0.0622258	0
HS_H3K27ac_104450	0.119792	0
HS_H3K27ac_104453	0.138417	0
HS_H3K27ac_104454	0.108911	0
HS_H3K27ac_104455	0.151335	0
HS_H3K27ac_104456	0.128906	0
HS_H3K27ac_104457	0.121386	0
HS_H3K27ac_104462	0.164754	0
HS_H3K27ac_104464	0.454283	0
HS_H3K27ac_104466	0.190428	0
HS_H3K27ac_104469	0.125786	0
HS_H3K27ac_10448	0.106173	0
HS_H3K27ac_104481	0.158336	0
HS_H3K27ac_104482	0.099791	0
HS_H3K27ac_104483	0.0942712	0
HS_H3K27ac_104486	0.104661	0
HS_H3K27ac_104490	0.0407974	0
HS_H3K27ac_104491	0.0602373	0
HS_H3K27ac_104492	0.153381	0
HS_H3K27ac_104493	0.103981	0
HS_H3K27ac_104494	0.124651	0
HS_H3K27ac_104495	0.0814885	0
HS_H3K27ac_104496	0.123383	0
HS_H3K27ac_104497	0.0693069	0
HS_H3K27ac_104501	0.146341	0
HS_H3K27ac_104502	0.100844	0
HS_H3K27ac_104503	0.150232	0
HS_H3K27ac_104504	0.17955	0
HS_H3K27ac_104505	0.0849277	0
HS_H3K27ac_104506	0.149209	0
HS_H3K27ac_104507	0.0893571	0
HS_H3K27ac_104508	0.116484	1
HS_H3K27ac_104510	0.0646141	0
HS_H3K27ac_104514	0.0847458	0
HS_H3K27ac_104520	0.137089	0
HS_H3K27ac_104521	0.109603	0
HS_H3K27ac_104522	0.10961	0
HS_H3K27ac_104523	0.130254	0
HS_H3K27ac_104525	0.0813473	0
HS_H3K27ac_104526	0.11554	0
HS_H3K27ac_104527	0.129435	0
HS_H3K27ac_104528	0.0942065	0
HS_H3K27ac_104529	0.0932457	0
HS_H3K27ac_104530	0.0927263	0
HS_H3K27ac_104531	0.104651	0
HS_H3K27ac_104532	0.1154	0
HS_H3K27ac_104533	0.114927	0
HS_H3K27ac_104537	0.120708	1
HS_H3K27ac_104538	0.104053	0
HS_H3K27ac_104539	0.103565	0
HS_H3K27ac_104540	0.0998053	0
HS_H3K27ac_104541	0.075	0
HS_H3K27ac_104542	0.101004	0
HS_H3K27ac_104543	0.124821	0
HS_H3K27ac_104544	0.142857	0
HS_H3K27ac_104545	0.109123	0
HS_H3K27ac_104547	0.105125	0
HS_H3K27ac_104548	0.137803	0
HS_H3K27ac_104549	0.141045	0
HS_H3K27ac_10455	0.125247	0
HS_H3K27ac_104551	0.10192	0
HS_H3K27ac_104552	0.117181	0
HS_H3K27ac_104556	0.105969	0
HS_H3K27ac_104557	0.108252	0
HS_H3K27ac_104558	0.0850714	0
HS_H3K27ac_10456	0.111767	0
HS_H3K27ac_104561	0.0990881	0
HS_H3K27ac_104563	0.102577	0
HS_H3K27ac_104564	0.114855	0
HS_H3K27ac_10457	0.100232	0
HS_H3K27ac_104571	0.119122	0
HS_H3K27ac_104572	0.100243	0
HS_H3K27ac_104573	0.106448	0
HS_H3K27ac_104575	0.0988842	0
HS_H3K27ac_104576	0.0984171	0
HS_H3K27ac_104578	0.111292	0
HS_H3K27ac_104579	0.087007	0
HS_H3K27ac_10458	0.0914781	0
HS_H3K27ac_104581	0.105058	0
HS_H3K27ac_104586	0.132611	0
HS_H3K27ac_104589	0.0695693	0
HS_H3K27ac_10459	0.111346	0
HS_H3K27ac_104590	0.117441	1
HS_H3K27ac_104591	0.135121	0
HS_H3K27ac_104592	0.117462	0
HS_H3K27ac_104594	0.105351	0
HS_H3K27ac_104595	0.0906293	0
HS_H3K27ac_104597	0.199329	0
HS_H3K27ac_104599	0.106496	1
HS_H3K27ac_10460	0.0725926	0
HS_H3K27ac_104600	0.108995	0
HS_H3K27ac_104601	0.0907327	0
HS_H3K27ac_104602	0.0830861	0
HS_H3K27ac_104603	0.0581154	0
HS_H3K27ac_104604	0.123328	0
HS_H3K27ac_104609	0.101201	0
HS_H3K27ac_10461	0.0738417	0
HS_H3K27ac_104610	0.117895	0
HS_H3K27ac_104611	0.110012	0
HS_H3K27ac_104612	0.252014	0
HS_H3K27ac_104619	0.103294	0
HS_H3K27ac_10462	0.126576	0
HS_H3K27ac_104620	0.250223	1
HS_H3K27ac_104623	0.206604	0
HS_H3K27ac_104624	0.103001	0
HS_H3K27ac_104625	0.121843	0
HS_H3K27ac_104629	0.115538	0
HS_H3K27ac_10463	0.119126	0
HS_H3K27ac_104630	0.174934	0
HS_H3K27ac_104631	0.0872939	0
HS_H3K27ac_104632	0.119919	0
HS_H3K27ac_104633	0.135841	0
HS_H3K27ac_104634	0.132679	0
HS_H3K27ac_104635	0.0920555	0
HS_H3K27ac_104637	0.112316	0
HS_H3K27ac_104638	0.163028	0
HS_H3K27ac_10464	0.119966	0
HS_H3K27ac_104640	0.111653	0
HS_H3K27ac_104641	0.0996205	0
HS_H3K27ac_104642	0.179659	0
HS_H3K27ac_104643	0.106273	0
HS_H3K27ac_104644	0.0988827	0
HS_H3K27ac_104645	0.104446	0
HS_H3K27ac_104647	0.105808	0
HS_H3K27ac_104648	0.0889011	0
HS_H3K27ac_104651	0.101686	0
HS_H3K27ac_104653	0.114286	0
HS_H3K27ac_104655	0.121313	0
HS_H3K27ac_104656	0.115085	0
HS_H3K27ac_104657	0.104938	0
HS_H3K27ac_104658	0.0940351	0
HS_H3K27ac_104660	0.110329	0
HS_H3K27ac_104662	0.12338	0
HS_H3K27ac_104663	0.128971	0
HS_H3K27ac_104666	0.105315	0
HS_H3K27ac_104667	0.109641	0
HS_H3K27ac_104668	0.127984	0
HS_H3K27ac_104669	0.121815	0
HS_H3K27ac_104671	0.116891	0
HS_H3K27ac_104675	0.113734	0
HS_H3K27ac_104676	0.107281	0
HS_H3K27ac_104678	0.091674	0
HS_H3K27ac_104679	0.109511	0
HS_H3K27ac_104682	0.0883341	0
HS_H3K27ac_104684	0.100605	0
HS_H3K27ac_104685	0.104466	0
HS_H3K27ac_104686	0.120936	0
HS_H3K27ac_104687	0.16231	0
HS_H3K27ac_104690	0.127802	0
HS_H3K27ac_104692	0.10553	0
HS_H3K27ac_104693	0.142809	0
HS_H3K27ac_104695	0.128776	0
HS_H3K27ac_104696	0.116388	0
HS_H3K27ac_104697	0.113759	0
HS_H3K27ac_104699	0.134847	0
HS_H3K27ac_104701	0.131732	0
HS_H3K27ac_104702	0.119207	0
HS_H3K27ac_104708	0.133766	0
HS_H3K27ac_104709	0.144691	0
HS_H3K27ac_10471	0.10945	0
HS_H3K27ac_104710	0.125946	0
HS_H3K27ac_104715	0.118914	0
HS_H3K27ac_104718	0.109053	0
HS_H3K27ac_104719	0.102174	0
HS_H3K27ac_10472	0.108591	0
HS_H3K27ac_104720	0.0983607	0
HS_H3K27ac_104721	0.114112	0
HS_H3K27ac_104722	0.115816	0
HS_H3K27ac_104724	0.0993062	0
HS_H3K27ac_104725	0.113125	0
HS_H3K27ac_104729	0.0992082	0
HS_H3K27ac_104730	0.124744	0
HS_H3K27ac_104731	0.122012	0
HS_H3K27ac_104733	0.217419	0
HS_H3K27ac_104734	0.119673	0
HS_H3K27ac_104735	0.384441	0
HS_H3K27ac_104736	0.110706	0
HS_H3K27ac_104739	0.100379	0
HS_H3K27ac_10474	0.109646	0
HS_H3K27ac_104741	0.114124	0
HS_H3K27ac_104744	0.109154	0
HS_H3K27ac_104746	0.0950788	0
HS_H3K27ac_104747	0.111809	0
HS_H3K27ac_104749	0.325028	0
HS_H3K27ac_10475	0.0898765	0
HS_H3K27ac_104750	0.11443	0
HS_H3K27ac_104754	0.100097	0
HS_H3K27ac_104756	0.112156	0
HS_H3K27ac_10476	0.100906	0
HS_H3K27ac_104762	0.183503	0
HS_H3K27ac_104764	0.301961	0
HS_H3K27ac_104765	0.107434	0
HS_H3K27ac_104766	0.105649	0
HS_H3K27ac_104767	0.114628	1
HS_H3K27ac_104768	0.121586	0
HS_H3K27ac_104769	0.127036	0
HS_H3K27ac_104771	0.140786	0
HS_H3K27ac_104773	0.108252	0
HS_H3K27ac_104779	0.136769	0
HS_H3K27ac_10478	0.104882	1
HS_H3K27ac_10479	0.123851	0
HS_H3K27ac_104791	0.172553	0
HS_H3K27ac_104792	0.0971345	0
HS_H3K27ac_104793	0.117113	0
HS_H3K27ac_104794	0.0989011	0
HS_H3K27ac_104795	0.0876592	0
HS_H3K27ac_104796	0.109927	0
HS_H3K27ac_104797	0.112124	0
HS_H3K27ac_104798	0.125652	0
HS_H3K27ac_104799	0.112847	0
HS_H3K27ac_10480	0.088706	0
HS_H3K27ac_104800	0.105986	0
HS_H3K27ac_104801	0.0955446	0
HS_H3K27ac_104802	0.12768	0
HS_H3K27ac_104808	0.0981661	0
HS_H3K27ac_10481	0.283314	0
HS_H3K27ac_104814	0.0882993	0
HS_H3K27ac_104815	0.0816236	0
HS_H3K27ac_104816	0.0729814	0
HS_H3K27ac_104817	0.1067	0
HS_H3K27ac_104818	0.107784	0
HS_H3K27ac_104819	0.0718487	0
HS_H3K27ac_10482	0.0615782	0
HS_H3K27ac_104820	0.103648	0
HS_H3K27ac_104821	0.103637	0
HS_H3K27ac_104827	0.0924548	0
HS_H3K27ac_104828	0.128749	0
HS_H3K27ac_104829	0.0970822	0
HS_H3K27ac_10483	0.104956	0
HS_H3K27ac_104830	0.0943396	0
HS_H3K27ac_104831	0.0940489	0
HS_H3K27ac_104834	0.139089	1
HS_H3K27ac_104835	0.116258	0
HS_H3K27ac_104836	0.133867	0
HS_H3K27ac_10484	0.12069	0
HS_H3K27ac_104841	0.111054	0
HS_H3K27ac_104842	0.0958722	0
HS_H3K27ac_104844	0.121274	0
HS_H3K27ac_104846	0.386576	0
HS_H3K27ac_104847	0.121394	0
HS_H3K27ac_104849	0.105791	0
HS_H3K27ac_10485	0.101054	0
HS_H3K27ac_104854	0.1145	0
HS_H3K27ac_104855	0.115674	0
HS_H3K27ac_104856	0.126674	0
HS_H3K27ac_104857	0.118714	0
HS_H3K27ac_104858	0.0964187	0
HS_H3K27ac_104859	0.0938722	0
HS_H3K27ac_10486	0.0744382	0
HS_H3K27ac_104861	0.124376	0
HS_H3K27ac_104862	0.141383	0
HS_H3K27ac_104869	0.128132	0
HS_H3K27ac_104871	0.113255	0
HS_H3K27ac_104872	0.12701	0
HS_H3K27ac_104874	0.0975177	0
HS_H3K27ac_104875	0.102733	0
HS_H3K27ac_104876	0.101428	0
HS_H3K27ac_104877	0.120918	0
HS_H3K27ac_104878	0.0969055	0
HS_H3K27ac_104879	0.127814	0
HS_H3K27ac_10488	0.084022	0
HS_H3K27ac_104880	0.111673	0
HS_H3K27ac_104881	0.101632	0
HS_H3K27ac_104883	0.129196	0
HS_H3K27ac_104884	0.104743	0
HS_H3K27ac_104885	0.104186	0
HS_H3K27ac_104886	0.129863	0
HS_H3K27ac_104888	0.0977556	0
HS_H3K27ac_104889	0.110579	0
HS_H3K27ac_10489	0.213239	0
HS_H3K27ac_104890	0.110067	0
HS_H3K27ac_104891	0.124099	0
HS_H3K27ac_104895	0.112039	0
HS_H3K27ac_104898	0.13959	0
HS_H3K27ac_10490	0.115122	0
HS_H3K27ac_104901	0.117718	0
HS_H3K27ac_10491	0.128074	0
HS_H3K27ac_10492	0.135894	0
HS_H3K27ac_10493	0.118652	0
HS_H3K27ac_10494	0.125	0
HS_H3K27ac_10495	0.107412	0
HS_H3K27ac_10496	0.0866873	0
HS_H3K27ac_10497	0.114845	0
HS_H3K27ac_105057	0.0813078	0
HS_H3K27ac_105060	0.128647	0
HS_H3K27ac_105063	0.121032	0
HS_H3K27ac_105292	0.10939	0
HS_H3K27ac_105301	0.140513	0
HS_H3K27ac_105303	0.124876	0
HS_H3K27ac_105307	0.131864	0
HS_H3K27ac_105313	0.13326	0
HS_H3K27ac_10533	0.104644	0
HS_H3K27ac_10534	0.148184	0
HS_H3K27ac_105341	0.494048	0
HS_H3K27ac_10535	0.140763	0
HS_H3K27ac_10539	0.0397964	0
HS_H3K27ac_10540	0.137494	0
HS_H3K27ac_105405	0.1001	0
HS_H3K27ac_105409	0.0890194	0
HS_H3K27ac_10541	0.192189	0
HS_H3K27ac_105410	0.110725	0
HS_H3K27ac_105413	0.11697	0
HS_H3K27ac_10542	0.071831	1
HS_H3K27ac_10543	0.129047	0
HS_H3K27ac_10544	0.151515	0
HS_H3K27ac_10547	0.161928	0
HS_H3K27ac_10551	0.106105	1
HS_H3K27ac_10552	0.0922722	0
HS_H3K27ac_10553	0.0549451	0
HS_H3K27ac_105548	0.0651872	0
HS_H3K27ac_105549	0.114452	0
HS_H3K27ac_10555	0.123395	0
HS_H3K27ac_105550	0.10405	0
HS_H3K27ac_10557	0.151849	0
HS_H3K27ac_105573	0.113952	0
HS_H3K27ac_105575	0.127711	0
HS_H3K27ac_10558	0.13995	0
HS_H3K27ac_10559	0.119026	0
HS_H3K27ac_105629	0.0224	0
HS_H3K27ac_10567	0.109497	0
HS_H3K27ac_10568	0.116808	0
HS_H3K27ac_10569	0.107118	0
HS_H3K27ac_10570	0.100784	0
HS_H3K27ac_105700	0.156844	0
HS_H3K27ac_105702	0.0999021	0
HS_H3K27ac_105703	0.121288	0
HS_H3K27ac_105704	0.152758	0
HS_H3K27ac_105705	0.12065	0
HS_H3K27ac_105706	0.101673	0
HS_H3K27ac_105707	0.269427	1
HS_H3K27ac_105709	0.107469	0
HS_H3K27ac_105710	0.136396	0
HS_H3K27ac_105712	0.124878	0
HS_H3K27ac_105713	0.115058	0
HS_H3K27ac_105717	0.139004	0
HS_H3K27ac_105718	0.132975	0
HS_H3K27ac_10572	0.0976214	0
HS_H3K27ac_10573	0.085722	0
HS_H3K27ac_10575	0.109662	0
HS_H3K27ac_10579	0.120277	0
HS_H3K27ac_105798	0.110687	0
HS_H3K27ac_105801	0.105	0
HS_H3K27ac_105802	0.1441	0
HS_H3K27ac_105804	0.0810277	0
HS_H3K27ac_105812	0.113934	0
HS_H3K27ac_105813	0.206416	1
HS_H3K27ac_105819	0.1248	0
HS_H3K27ac_105820	0.0949188	0
HS_H3K27ac_105821	0.117798	0
HS_H3K27ac_105822	0.123148	0
HS_H3K27ac_105823	0.112715	0
HS_H3K27ac_105827	0.0964207	0
HS_H3K27ac_10583	0.136855	0
HS_H3K27ac_105840	0.0992406	0
HS_H3K27ac_105851	0.09219	1
HS_H3K27ac_105852	0.132767	0
HS_H3K27ac_105853	0.104252	0
HS_H3K27ac_105854	0.120565	0
HS_H3K27ac_105855	0.121766	0
HS_H3K27ac_105856	0.130342	0
HS_H3K27ac_105859	0.604827	0
HS_H3K27ac_10586	0.202974	0
HS_H3K27ac_105860	0.12987	0
HS_H3K27ac_105866	0.119911	0
HS_H3K27ac_105868	0.104288	0
HS_H3K27ac_105869	0.0943571	0
HS_H3K27ac_10587	0.117794	0
HS_H3K27ac_105870	0.103342	0
HS_H3K27ac_105872	0.0947891	0
HS_H3K27ac_105873	0.68932	0
HS_H3K27ac_105874	0.13343	0
HS_H3K27ac_105875	0.142388	0
HS_H3K27ac_105876	0.113519	0
HS_H3K27ac_105877	0.127015	0
HS_H3K27ac_105880	0.119772	0
HS_H3K27ac_105881	0.130527	0
HS_H3K27ac_105883	0.100198	0
HS_H3K27ac_105884	0.112164	0
HS_H3K27ac_105887	0.109403	1
HS_H3K27ac_105888	0.0987903	0
HS_H3K27ac_105891	0.148256	0
HS_H3K27ac_105893	0.0888993	0
HS_H3K27ac_105894	0.112309	0
HS_H3K27ac_105895	0.122649	0
HS_H3K27ac_105896	0.132612	0
HS_H3K27ac_105897	0.109879	0
HS_H3K27ac_105900	0.100449	0
HS_H3K27ac_105908	0.0975249	0
HS_H3K27ac_105909	0.102019	0
HS_H3K27ac_105911	0.11657	0
HS_H3K27ac_105912	0.11802	0
HS_H3K27ac_105914	0.105163	0
HS_H3K27ac_105915	0.122254	0
HS_H3K27ac_105917	0.0769231	0
HS_H3K27ac_105925	0.122267	0
HS_H3K27ac_105928	0.0962594	0
HS_H3K27ac_105929	0.115928	0
HS_H3K27ac_10593	0.25819	0
HS_H3K27ac_105930	0.106061	0
HS_H3K27ac_105931	0.102737	0
HS_H3K27ac_105933	0.152655	0
HS_H3K27ac_105934	0.133154	0
HS_H3K27ac_105935	0.111471	0
HS_H3K27ac_105938	0.136179	0
HS_H3K27ac_105939	0.116373	0
HS_H3K27ac_105940	0.117617	0
HS_H3K27ac_105941	0.164712	0
HS_H3K27ac_105942	0.135286	1
HS_H3K27ac_105943	0.419478	0
HS_H3K27ac_105944	0.160991	0
HS_H3K27ac_105945	0.136671	1
HS_H3K27ac_105946	0.104552	0
HS_H3K27ac_105947	0.0944345	0
HS_H3K27ac_105948	0.120516	0
HS_H3K27ac_105949	0.0920821	0
HS_H3K27ac_105950	0.117016	0
HS_H3K27ac_105951	0.108053	0
HS_H3K27ac_105953	0.127322	0
HS_H3K27ac_105957	0.0826291	0
HS_H3K27ac_105958	0.146033	0
HS_H3K27ac_105959	0.136986	0
HS_H3K27ac_105964	0.100127	0
HS_H3K27ac_105968	0.11992	0
HS_H3K27ac_105972	0.0921883	0
HS_H3K27ac_105977	0.358418	0
HS_H3K27ac_105981	0.0908929	0
HS_H3K27ac_105989	0.108504	0
HS_H3K27ac_105991	0.0807453	0
HS_H3K27ac_105992	0.0979212	0
HS_H3K27ac_105993	0.111602	0
HS_H3K27ac_105994	0.116129	0
HS_H3K27ac_105995	0.204287	1
HS_H3K27ac_105996	0.0979271	0
HS_H3K27ac_105999	0.0888761	0
HS_H3K27ac_106000	0.0848264	0
HS_H3K27ac_106002	0.105108	0
HS_H3K27ac_106003	0.147905	0
HS_H3K27ac_106005	0.114173	0
HS_H3K27ac_106006	0.118234	0
HS_H3K27ac_106008	0.126119	0
HS_H3K27ac_10602	0.10699	0
HS_H3K27ac_106022	0.085	1
HS_H3K27ac_106029	0.135952	0
HS_H3K27ac_10603	0.124796	0
HS_H3K27ac_10604	0.170666	0
HS_H3K27ac_106047	0.1086	0
HS_H3K27ac_106048	0.11241	1
HS_H3K27ac_106049	0.14774	0
HS_H3K27ac_106050	0.188356	0
HS_H3K27ac_106055	0.0975493	0
HS_H3K27ac_106056	0.101805	0
HS_H3K27ac_106057	0.118233	0
HS_H3K27ac_106058	0.0997613	0
HS_H3K27ac_106059	0.116404	0
HS_H3K27ac_10606	0.126794	0
HS_H3K27ac_106060	0.106024	0
HS_H3K27ac_106061	0.108476	0
HS_H3K27ac_106062	0.100167	0
HS_H3K27ac_106063	0.115385	0
HS_H3K27ac_106064	0.126331	0
HS_H3K27ac_106065	0.124607	0
HS_H3K27ac_106066	0.123407	0
HS_H3K27ac_106067	0.113218	0
HS_H3K27ac_106068	0.116438	0
HS_H3K27ac_106070	0.0542636	0
HS_H3K27ac_106071	0.0958165	0
HS_H3K27ac_106072	0.104195	0
HS_H3K27ac_106074	0.130581	0
HS_H3K27ac_106075	0.0965139	0
HS_H3K27ac_106076	0.107317	0
HS_H3K27ac_106077	0.132997	0
HS_H3K27ac_106078	0.113463	0
HS_H3K27ac_106079	0.0978814	0
HS_H3K27ac_10608	0.13774	0
HS_H3K27ac_106080	0.0893597	0
HS_H3K27ac_106082	0.088125	0
HS_H3K27ac_106084	0.097288	0
HS_H3K27ac_106085	0.115756	0
HS_H3K27ac_106086	0.13396	0
HS_H3K27ac_106088	0.107481	0
HS_H3K27ac_106089	0.106454	0
HS_H3K27ac_10609	0.133869	0
HS_H3K27ac_106090	0.109562	0
HS_H3K27ac_106099	0.0781991	0
HS_H3K27ac_10610	0.146215	0
HS_H3K27ac_106101	0.124496	0
HS_H3K27ac_106102	0.0837547	0
HS_H3K27ac_106103	0.0989367	0
HS_H3K27ac_106104	0.0963939	0
HS_H3K27ac_106105	0.109462	0
HS_H3K27ac_106106	0.113931	0
HS_H3K27ac_106111	0.115487	1
HS_H3K27ac_106112	0.114951	0
HS_H3K27ac_106113	0.112113	0
HS_H3K27ac_106114	0.120293	0
HS_H3K27ac_106118	0.152403	0
HS_H3K27ac_106119	0.107992	0
HS_H3K27ac_106120	0.101562	0
HS_H3K27ac_106121	0.112945	0
HS_H3K27ac_106122	0.112305	0
HS_H3K27ac_106123	0.0961743	0
HS_H3K27ac_106127	0.159389	0
HS_H3K27ac_106129	0	0
HS_H3K27ac_10613	0.137186	0
HS_H3K27ac_106134	0.0960566	0
HS_H3K27ac_106137	0.104614	0
HS_H3K27ac_106138	0.102689	0
HS_H3K27ac_106142	0.0938486	0
HS_H3K27ac_106143	0.137459	0
HS_H3K27ac_106153	0.111355	0
HS_H3K27ac_106156	0.367415	0
HS_H3K27ac_106157	0.152	0
HS_H3K27ac_106158	0.098136	0
HS_H3K27ac_106159	0.104222	0
HS_H3K27ac_10616	0.152356	0
HS_H3K27ac_106160	0.123463	0
HS_H3K27ac_106161	0.102444	0
HS_H3K27ac_106162	0.0962644	0
HS_H3K27ac_106164	0.100456	0
HS_H3K27ac_106166	0.152299	0
HS_H3K27ac_106167	0.131122	0
HS_H3K27ac_106168	0.130435	0
HS_H3K27ac_106186	0.0882103	1
HS_H3K27ac_106189	0.0940129	0
HS_H3K27ac_10619	0.121666	0
HS_H3K27ac_106190	0.092987	0
HS_H3K27ac_106202	0.117916	0
HS_H3K27ac_106203	0.10286	0
HS_H3K27ac_106204	0.0960347	0
HS_H3K27ac_106206	0.101724	0
HS_H3K27ac_106207	0.12413	0
HS_H3K27ac_106209	0.098008	0
HS_H3K27ac_10621	0.11809	0
HS_H3K27ac_106210	0.0983796	0
HS_H3K27ac_106214	0.148463	0
HS_H3K27ac_106217	0.117547	0
HS_H3K27ac_106218	0.125255	0
HS_H3K27ac_106219	0.0809604	0
HS_H3K27ac_106220	0.1167	0
HS_H3K27ac_106221	0.102116	0
HS_H3K27ac_106225	0.112724	0
HS_H3K27ac_106231	0.112097	0
HS_H3K27ac_106232	0.0725943	0
HS_H3K27ac_106233	0.114924	0
HS_H3K27ac_106234	0.11602	0
HS_H3K27ac_106236	0.10581	0
HS_H3K27ac_106237	0.0893776	1
HS_H3K27ac_106238	0.109646	0
HS_H3K27ac_106239	0.0667252	0
HS_H3K27ac_10624	0.121604	0
HS_H3K27ac_106244	0.101178	0
HS_H3K27ac_106245	0.122868	0
HS_H3K27ac_106246	0.0826806	0
HS_H3K27ac_106249	0.102193	0
HS_H3K27ac_106250	0.0839547	0
HS_H3K27ac_106259	0.0837227	0
HS_H3K27ac_10626	0.0779964	0
HS_H3K27ac_106261	0.109329	0
HS_H3K27ac_106262	0.0813239	0
HS_H3K27ac_106263	0.128631	0
HS_H3K27ac_106271	0.10687	0
HS_H3K27ac_106279	0.12232	0
HS_H3K27ac_106280	0.0972143	0
HS_H3K27ac_106281	0.0735795	0
HS_H3K27ac_106287	0.0726496	0
HS_H3K27ac_106291	0.103627	0
HS_H3K27ac_106293	0.0884041	1
[truncated: 37,438 more rows]

## Sheet: bushbaby
CRE	subs_per_total	conservation_status
HS_H3K27ac_10000	0.220199	0
HS_H3K27ac_10002	0.205842	0
HS_H3K27ac_10003	0.311315	0
HS_H3K27ac_10004	0.224018	0
HS_H3K27ac_10009	0.281095	0
HS_H3K27ac_10010	0.267913	1
HS_H3K27ac_10011	0.245929	0
HS_H3K27ac_10012	0.264207	0
HS_H3K27ac_10013	0.234873	0
HS_H3K27ac_10014	0.2557	0
HS_H3K27ac_10016	0.218543	0
HS_H3K27ac_10017	0.252913	0
HS_H3K27ac_10018	0.254345	0
HS_H3K27ac_10019	0.216931	0
HS_H3K27ac_10020	0.197289	0
HS_H3K27ac_10021	0.288182	0
HS_H3K27ac_10022	0.203376	0
HS_H3K27ac_10023	0.227661	0
HS_H3K27ac_100232	0.120419	0
HS_H3K27ac_100233	0.381961	0
HS_H3K27ac_10024	0.175534	0
HS_H3K27ac_100241	0.426697	0
HS_H3K27ac_100247	0.365652	0
HS_H3K27ac_100248	0.294887	0
HS_H3K27ac_100251	0.322581	1
HS_H3K27ac_100252	0.456931	0
HS_H3K27ac_10026	0.145719	0
HS_H3K27ac_10027	0.157579	0
HS_H3K27ac_100271	0.423826	0
HS_H3K27ac_10028	0.203274	0
HS_H3K27ac_10029	0.220264	0
HS_H3K27ac_10030	0.177093	0
HS_H3K27ac_10032	0.217632	0
HS_H3K27ac_10034	0.230017	0
HS_H3K27ac_100370	0.420401	0
HS_H3K27ac_100374	0.405664	0
HS_H3K27ac_100377	0.286373	0
HS_H3K27ac_100397	0.16716	0
HS_H3K27ac_100400	0.270945	0
HS_H3K27ac_10046	0.33681	0
HS_H3K27ac_100461	0.308357	1
HS_H3K27ac_100462	0.348765	0
HS_H3K27ac_100465	0.40163	1
HS_H3K27ac_100466	0.361955	1
HS_H3K27ac_10053	0.278623	0
HS_H3K27ac_100549	0.35745	0
HS_H3K27ac_100558	0.29774	0
HS_H3K27ac_10056	0.257401	0
HS_H3K27ac_100561	0.267305	0
HS_H3K27ac_100563	0.340206	1
HS_H3K27ac_100565	0.338944	0
HS_H3K27ac_100568	0.352941	1
HS_H3K27ac_100570	0.41249	0
HS_H3K27ac_10058	0.202059	0
HS_H3K27ac_10060	0.24049	0
HS_H3K27ac_10061	0.175905	0
HS_H3K27ac_10063	0.149396	1
HS_H3K27ac_10064	0.201515	0
HS_H3K27ac_10065	0.199239	0
HS_H3K27ac_10067	0.172255	0
HS_H3K27ac_100676	0.297891	0
HS_H3K27ac_100677	0.272118	0
HS_H3K27ac_100678	0.309564	0
HS_H3K27ac_10068	0.185736	1
HS_H3K27ac_100680	0.342466	1
HS_H3K27ac_100682	0.271211	0
HS_H3K27ac_10069	0.214822	0
HS_H3K27ac_100690	0.222452	0
HS_H3K27ac_100691	0.301176	0
HS_H3K27ac_100693	0.190942	0
HS_H3K27ac_100694	0.281414	1
HS_H3K27ac_100695	0.244305	0
HS_H3K27ac_100698	0.28866	0
HS_H3K27ac_10070	0.173498	0
HS_H3K27ac_100704	0.312461	0
HS_H3K27ac_100706	0.27	0
HS_H3K27ac_100707	0.306902	0
HS_H3K27ac_100708	0.301362	0
HS_H3K27ac_100709	0.27366	0
HS_H3K27ac_100710	0.270287	0
HS_H3K27ac_100711	0.252722	0
HS_H3K27ac_100713	0.178388	0
HS_H3K27ac_100715	0.277529	0
HS_H3K27ac_100718	0.27845	0
HS_H3K27ac_100719	0.28232	1
HS_H3K27ac_10072	0.115005	0
HS_H3K27ac_100720	0.261835	0
HS_H3K27ac_100721	0.273103	0
HS_H3K27ac_100724	0.26749	0
HS_H3K27ac_100727	0.133038	0
HS_H3K27ac_100728	0.131	0
HS_H3K27ac_100729	0.185635	0
HS_H3K27ac_10073	0.105769	0
HS_H3K27ac_10074	0.159111	0
HS_H3K27ac_100741	0.236267	0
HS_H3K27ac_100744	0.271444	0
HS_H3K27ac_100745	0.305785	1
HS_H3K27ac_10075	0.240869	0
HS_H3K27ac_100750	0.239067	0
HS_H3K27ac_100755	0.266086	0
HS_H3K27ac_10076	0.204839	0
HS_H3K27ac_100761	0.285096	0
HS_H3K27ac_100778	0.22958	0
HS_H3K27ac_100779	0.307729	1
HS_H3K27ac_100780	0.113529	0
HS_H3K27ac_100781	0.26589	1
HS_H3K27ac_100782	0.234532	0
HS_H3K27ac_100783	0.265576	0
HS_H3K27ac_10079	0.0905923	0
HS_H3K27ac_1008	0.398176	0
HS_H3K27ac_10080	0.178327	0
HS_H3K27ac_100803	0.205614	0
HS_H3K27ac_100804	0.259292	0
HS_H3K27ac_10081	0.163265	0
HS_H3K27ac_100812	0.268323	0
HS_H3K27ac_100813	0.203902	0
HS_H3K27ac_10082	0.22142	0
HS_H3K27ac_100820	0.199393	1
HS_H3K27ac_100821	0.227705	0
HS_H3K27ac_100822	0.192376	0
HS_H3K27ac_100823	0.165336	0
HS_H3K27ac_100824	0.0980651	0
HS_H3K27ac_100825	0.145194	0
HS_H3K27ac_100826	0.231893	0
HS_H3K27ac_100828	0.231738	0
HS_H3K27ac_100829	0.17619	0
HS_H3K27ac_100831	0.225171	0
HS_H3K27ac_100835	0.277147	0
HS_H3K27ac_100836	0.258555	0
HS_H3K27ac_100837	0.225983	0
HS_H3K27ac_100838	0.219011	0
HS_H3K27ac_100839	0.256394	0
HS_H3K27ac_100842	0.208804	1
HS_H3K27ac_100843	0.28005	0
HS_H3K27ac_10085	0.16686	1
HS_H3K27ac_10086	0.201365	0
HS_H3K27ac_100862	0.239802	0
HS_H3K27ac_100863	0.209465	1
HS_H3K27ac_100864	0.234981	0
HS_H3K27ac_100868	0.268293	0
HS_H3K27ac_100869	0.227619	0
HS_H3K27ac_10087	0.164752	0
HS_H3K27ac_100870	0.232932	0
HS_H3K27ac_100871	0.226145	0
HS_H3K27ac_100873	0.0922693	1
HS_H3K27ac_100874	0.199634	0
HS_H3K27ac_100875	0.185982	0
HS_H3K27ac_100876	0.222153	0
HS_H3K27ac_100896	0.151079	1
HS_H3K27ac_10090	0.221557	0
HS_H3K27ac_100904	0.293148	0
HS_H3K27ac_10091	0.23427	0
HS_H3K27ac_100914	0.305952	0
HS_H3K27ac_100916	0.301444	0
HS_H3K27ac_100917	0.249153	0
HS_H3K27ac_10092	0.222724	0
HS_H3K27ac_100926	0.275098	0
HS_H3K27ac_100927	0.143237	0
HS_H3K27ac_100929	0.313275	0
HS_H3K27ac_100930	0.304679	0
HS_H3K27ac_100935	0.30965	0
HS_H3K27ac_100937	0.28295	0
HS_H3K27ac_100938	0.310966	0
HS_H3K27ac_10094	0.193187	0
HS_H3K27ac_100940	0.313015	1
HS_H3K27ac_100941	0.262453	0
HS_H3K27ac_100944	0.257695	0
HS_H3K27ac_100946	0.295442	1
HS_H3K27ac_100947	0.251327	0
HS_H3K27ac_100948	0.304816	0
HS_H3K27ac_100951	0.341596	0
HS_H3K27ac_100952	0.313953	0
HS_H3K27ac_100953	0.345364	1
HS_H3K27ac_100954	0.300813	0
HS_H3K27ac_100955	0.273569	1
HS_H3K27ac_100956	0.241457	0
HS_H3K27ac_100957	0.306105	0
HS_H3K27ac_100958	0.287686	0
HS_H3K27ac_100960	0.268088	0
HS_H3K27ac_100962	0.281122	1
HS_H3K27ac_100963	0.264648	0
HS_H3K27ac_100964	0.268338	0
HS_H3K27ac_100968	0.323845	0
HS_H3K27ac_100970	0.288169	0
HS_H3K27ac_100972	0.237682	0
HS_H3K27ac_100981	0.291987	0
HS_H3K27ac_100985	0.312537	0
HS_H3K27ac_100986	0.241319	0
HS_H3K27ac_100987	0.305382	0
HS_H3K27ac_100989	0.266467	1
HS_H3K27ac_100990	0.23137	0
HS_H3K27ac_100992	0.3	0
HS_H3K27ac_100994	0.293921	0
HS_H3K27ac_100996	0.283067	1
HS_H3K27ac_100998	0.226702	0
HS_H3K27ac_10100	0.168103	0
HS_H3K27ac_101007	0.414841	0
HS_H3K27ac_101008	0.255997	0
HS_H3K27ac_10101	0.283186	0
HS_H3K27ac_101010	0.22449	0
HS_H3K27ac_101011	0.325245	0
HS_H3K27ac_101013	0.310518	0
HS_H3K27ac_10102	0.258065	0
HS_H3K27ac_101021	0.302386	0
HS_H3K27ac_101022	0.226735	0
HS_H3K27ac_101023	0.319325	0
HS_H3K27ac_101024	0.257665	0
HS_H3K27ac_101025	0.222039	0
HS_H3K27ac_101026	0.260914	0
HS_H3K27ac_101029	0.231915	0
HS_H3K27ac_10103	0.242424	0
HS_H3K27ac_101033	0.249595	0
HS_H3K27ac_101035	0.284874	0
HS_H3K27ac_101037	0.265893	0
HS_H3K27ac_101039	0.315003	0
HS_H3K27ac_10104	0.239875	0
HS_H3K27ac_101040	0.313093	0
HS_H3K27ac_101041	0.257414	0
HS_H3K27ac_10106	0.21978	1
HS_H3K27ac_101060	0.294769	0
HS_H3K27ac_10107	0.150407	0
HS_H3K27ac_10108	0.138365	0
HS_H3K27ac_101084	0.27193	0
HS_H3K27ac_101085	0.385147	0
HS_H3K27ac_101086	0.279356	0
HS_H3K27ac_101088	0.278699	1
HS_H3K27ac_101089	0.338668	0
HS_H3K27ac_101091	0.355299	0
HS_H3K27ac_101092	0.262085	0
HS_H3K27ac_101093	0.248094	0
HS_H3K27ac_101094	0.315491	0
HS_H3K27ac_101096	0.384896	0
HS_H3K27ac_101097	0.333948	0
HS_H3K27ac_101098	0.218947	0
HS_H3K27ac_101111	0.252421	0
HS_H3K27ac_101112	0.219202	0
HS_H3K27ac_101113	0.288897	0
HS_H3K27ac_101114	0.267827	0
HS_H3K27ac_101115	0.330426	0
HS_H3K27ac_101116	0.202744	0
HS_H3K27ac_101117	0.219402	0
HS_H3K27ac_101118	0.269716	0
HS_H3K27ac_101119	0.30077	0
HS_H3K27ac_101122	0.259241	0
HS_H3K27ac_101182	0.383475	0
HS_H3K27ac_101235	0.341667	0
HS_H3K27ac_101237	0.361386	0
HS_H3K27ac_101240	0.271664	0
HS_H3K27ac_101244	0.345391	0
HS_H3K27ac_101247	0.3332	0
HS_H3K27ac_101249	0.340763	0
HS_H3K27ac_101252	0.3247	0
HS_H3K27ac_101260	0.347368	0
HS_H3K27ac_101261	0.28365	0
HS_H3K27ac_101263	0.34382	0
HS_H3K27ac_101267	0.347395	0
HS_H3K27ac_101269	0.331325	1
HS_H3K27ac_101270	0.321471	0
HS_H3K27ac_101272	0.311021	0
HS_H3K27ac_101273	0.33281	0
HS_H3K27ac_101274	0.350439	0
HS_H3K27ac_101275	0.339648	0
HS_H3K27ac_101279	0.31864	0
HS_H3K27ac_101281	0.354573	0
HS_H3K27ac_101285	0.369599	0
HS_H3K27ac_10130	0.298303	0
HS_H3K27ac_101337	0.31082	0
HS_H3K27ac_101339	0.354542	0
HS_H3K27ac_10134	0.393227	1
HS_H3K27ac_101341	0.312935	1
HS_H3K27ac_101342	0.322757	0
HS_H3K27ac_101347	0.361534	0
HS_H3K27ac_101348	0.327962	0
HS_H3K27ac_101349	0.372521	0
HS_H3K27ac_10135	0.31521	0
HS_H3K27ac_101350	0.430612	1
HS_H3K27ac_101351	0.32008	0
HS_H3K27ac_101357	0.364889	0
HS_H3K27ac_101359	0.322688	0
HS_H3K27ac_101360	0.351129	0
HS_H3K27ac_101365	0.361807	0
HS_H3K27ac_101367	0.373944	0
HS_H3K27ac_101368	0.390916	0
HS_H3K27ac_101369	0.397105	0
HS_H3K27ac_101370	0.351125	0
HS_H3K27ac_101372	0.35052	0
HS_H3K27ac_101374	0.37602	0
HS_H3K27ac_101376	0.333959	0
HS_H3K27ac_101377	0.33003	0
HS_H3K27ac_10138	0.25	0
HS_H3K27ac_101382	0.339738	0
HS_H3K27ac_101385	0.246799	0
HS_H3K27ac_10139	0.297915	0
HS_H3K27ac_10140	0.246718	0
HS_H3K27ac_10142	0.217733	1
HS_H3K27ac_101422	0.249249	0
HS_H3K27ac_101423	0.322409	0
HS_H3K27ac_101427	0.372054	0
HS_H3K27ac_101432	0.321523	0
HS_H3K27ac_101434	0.301482	0
HS_H3K27ac_101436	0.333333	0
HS_H3K27ac_101439	0.327307	0
HS_H3K27ac_101442	0.198873	0
HS_H3K27ac_101465	0.367808	0
HS_H3K27ac_101466	0.346705	0
HS_H3K27ac_101467	0.348585	0
HS_H3K27ac_10147	0.288976	0
HS_H3K27ac_101473	0.322433	0
HS_H3K27ac_101474	0.287913	1
HS_H3K27ac_101475	0.332663	0
HS_H3K27ac_10149	0.264128	0
HS_H3K27ac_101493	0.292835	0
HS_H3K27ac_101496	0.316075	0
HS_H3K27ac_101497	0.194346	0
HS_H3K27ac_101499	0.280612	0
HS_H3K27ac_101500	0.284504	0
HS_H3K27ac_10151	0.324193	0
HS_H3K27ac_101519	0.290252	0
HS_H3K27ac_10152	0.29015	0
HS_H3K27ac_10153	0.253555	0
HS_H3K27ac_10156	0.296947	0
HS_H3K27ac_10157	0.245628	0
HS_H3K27ac_10158	0.281887	0
HS_H3K27ac_1016	0.377557	0
HS_H3K27ac_101616	0.278206	0
HS_H3K27ac_101617	0.263303	0
HS_H3K27ac_101618	0.306645	0
HS_H3K27ac_10163	0.22751	0
HS_H3K27ac_10164	0.352152	0
HS_H3K27ac_10165	0.324273	0
HS_H3K27ac_10167	0.29572	0
HS_H3K27ac_10168	0.241883	0
HS_H3K27ac_10169	0.296067	0
HS_H3K27ac_10171	0.261508	0
HS_H3K27ac_101713	0.326223	0
HS_H3K27ac_101715	0.18499	0
HS_H3K27ac_101725	0.270303	1
HS_H3K27ac_101726	0.306865	0
HS_H3K27ac_101727	0.254766	0
HS_H3K27ac_101729	0.280488	0
HS_H3K27ac_101730	0.378261	0
HS_H3K27ac_101731	0.315287	0
HS_H3K27ac_101732	0.281449	0
HS_H3K27ac_101733	0.281448	0
HS_H3K27ac_101735	0.342315	1
HS_H3K27ac_101736	0.335059	1
HS_H3K27ac_101737	0.22807	0
HS_H3K27ac_10174	0.269029	0
HS_H3K27ac_101742	0.256463	0
HS_H3K27ac_101743	0.140625	0
HS_H3K27ac_101744	0.261658	0
HS_H3K27ac_101745	0.257678	0
HS_H3K27ac_101746	0.278406	0
HS_H3K27ac_101747	0.318681	0
HS_H3K27ac_101748	0.21843	0
HS_H3K27ac_101749	0.254519	0
HS_H3K27ac_101750	0.264412	0
HS_H3K27ac_101753	0.245614	0
HS_H3K27ac_101757	0.0886076	0
HS_H3K27ac_101758	0.169956	0
HS_H3K27ac_101759	0.136596	0
HS_H3K27ac_101760	0.256849	0
HS_H3K27ac_101761	0.266491	0
HS_H3K27ac_101762	0.261538	0
HS_H3K27ac_101763	0.258836	0
HS_H3K27ac_101764	0.222714	0
HS_H3K27ac_101768	0.291493	1
HS_H3K27ac_101769	0.268982	1
HS_H3K27ac_10177	0.316254	0
HS_H3K27ac_101770	0.226019	0
HS_H3K27ac_101782	0.258443	0
HS_H3K27ac_101783	0.250158	0
HS_H3K27ac_101785	0.271382	0
HS_H3K27ac_101787	0.270171	0
HS_H3K27ac_101791	0.312461	1
HS_H3K27ac_101792	0.216901	0
HS_H3K27ac_101793	0.207343	0
HS_H3K27ac_101794	0.312161	0
HS_H3K27ac_101795	0.256637	0
HS_H3K27ac_101796	0.265385	1
HS_H3K27ac_101797	0.119048	0
HS_H3K27ac_101798	0.227545	0
HS_H3K27ac_101799	0.168665	0
HS_H3K27ac_101800	0.248175	0
HS_H3K27ac_101804	0.352113	0
HS_H3K27ac_101805	0.366667	0
HS_H3K27ac_101806	0.331227	0
HS_H3K27ac_101810	0.281271	0
HS_H3K27ac_101811	0.273632	0
HS_H3K27ac_101817	0.258978	1
HS_H3K27ac_101818	0.277873	0
HS_H3K27ac_101819	0.233038	0
HS_H3K27ac_101822	0.115064	0
HS_H3K27ac_101823	0.146003	0
HS_H3K27ac_101824	0.304011	1
HS_H3K27ac_101835	0.197321	0
HS_H3K27ac_101836	0.268338	0
HS_H3K27ac_101837	0.228833	1
HS_H3K27ac_101838	0.268554	0
HS_H3K27ac_101848	0.178828	1
HS_H3K27ac_101849	0.236952	0
HS_H3K27ac_101850	0.258595	1
HS_H3K27ac_101853	0.275542	1
HS_H3K27ac_101854	0.198839	1
HS_H3K27ac_101856	0.334725	0
HS_H3K27ac_101858	0.288535	0
HS_H3K27ac_101859	0.150177	0
HS_H3K27ac_101864	0.240838	0
HS_H3K27ac_101866	0.244503	0
HS_H3K27ac_101867	0.227918	0
HS_H3K27ac_101872	0.15744	1
HS_H3K27ac_101873	0.248357	0
HS_H3K27ac_101875	0.264569	0
HS_H3K27ac_101876	0.27467	0
HS_H3K27ac_101877	0.195214	0
HS_H3K27ac_101878	0.292314	0
HS_H3K27ac_101880	0.17882	0
HS_H3K27ac_101881	0.353535	1
HS_H3K27ac_101882	0.120612	0
HS_H3K27ac_101883	0.268409	1
HS_H3K27ac_101884	0.227039	0
HS_H3K27ac_101888	0.191992	0
HS_H3K27ac_101889	0.286885	1
HS_H3K27ac_101890	0.272059	1
HS_H3K27ac_101891	0.273788	0
HS_H3K27ac_101892	0.300983	1
HS_H3K27ac_101893	0.250442	0
HS_H3K27ac_101897	0.155629	0
HS_H3K27ac_101901	0.269461	0
HS_H3K27ac_101909	0.316081	0
HS_H3K27ac_10191	0.288971	0
HS_H3K27ac_101911	0.282609	0
HS_H3K27ac_101913	0.236527	0
HS_H3K27ac_101914	0.286724	0
HS_H3K27ac_101915	0.284274	0
HS_H3K27ac_101916	0.140244	0
HS_H3K27ac_101919	0.299567	0
HS_H3K27ac_101922	0.288443	0
HS_H3K27ac_101923	0.348165	1
HS_H3K27ac_101924	0.305785	1
HS_H3K27ac_101926	0.289881	0
HS_H3K27ac_101929	0.315927	1
HS_H3K27ac_101932	0.302473	0
HS_H3K27ac_101933	0.249806	1
HS_H3K27ac_101934	0.298042	0
HS_H3K27ac_101935	0.325275	0
HS_H3K27ac_101936	0.266208	0
HS_H3K27ac_101937	0.224873	1
HS_H3K27ac_101939	0.269527	0
HS_H3K27ac_10194	0.236598	0
HS_H3K27ac_101940	0.312281	0
HS_H3K27ac_101945	0.319149	0
HS_H3K27ac_101947	0.289663	0
HS_H3K27ac_101948	0.311818	0
HS_H3K27ac_101949	0.271536	0
HS_H3K27ac_10196	0.297943	0
HS_H3K27ac_101962	0.286374	1
HS_H3K27ac_101963	0.294118	1
HS_H3K27ac_10197	0.284003	0
HS_H3K27ac_101976	0.258121	0
HS_H3K27ac_101977	0.248485	0
HS_H3K27ac_10198	0.3258	0
HS_H3K27ac_10199	0.339941	0
HS_H3K27ac_102000	0.291422	0
HS_H3K27ac_102001	0.218062	1
HS_H3K27ac_102004	0.124077	0
HS_H3K27ac_10201	0.333333	0
HS_H3K27ac_102012	0.290226	0
HS_H3K27ac_102013	0.186047	0
HS_H3K27ac_102014	0.261503	0
HS_H3K27ac_102015	0.275656	0
HS_H3K27ac_102016	0.247453	0
HS_H3K27ac_102019	0.182243	1
HS_H3K27ac_102027	0.17584	0
HS_H3K27ac_102028	0.247439	0
HS_H3K27ac_102035	0.250394	0
HS_H3K27ac_102036	0.226328	0
HS_H3K27ac_102038	0.304219	0
HS_H3K27ac_102039	0.269791	0
HS_H3K27ac_102041	0.231073	1
HS_H3K27ac_102042	0.268415	0
HS_H3K27ac_102043	0.302978	0
HS_H3K27ac_102044	0.254959	0
HS_H3K27ac_102045	0.306706	1
HS_H3K27ac_102046	0.259184	1
HS_H3K27ac_102047	0.222469	1
HS_H3K27ac_102048	0.2567	0
HS_H3K27ac_102049	0.311136	0
HS_H3K27ac_10206	0.0720207	1
HS_H3K27ac_102063	0.332728	0
HS_H3K27ac_10207	0.206019	0
HS_H3K27ac_102071	0.273376	0
HS_H3K27ac_102072	0.272097	0
HS_H3K27ac_102073	0.256119	0
HS_H3K27ac_102074	0.260071	0
HS_H3K27ac_102075	0.206049	0
HS_H3K27ac_102076	0.238965	0
HS_H3K27ac_102077	0.268121	0
HS_H3K27ac_102078	0.221035	0
HS_H3K27ac_10208	0.215323	1
HS_H3K27ac_102080	0.224	0
HS_H3K27ac_102081	0.239281	0
HS_H3K27ac_102082	0.281337	0
HS_H3K27ac_102083	0.25526	0
HS_H3K27ac_102084	0.232251	0
HS_H3K27ac_102085	0.217272	0
HS_H3K27ac_102087	0.292527	0
HS_H3K27ac_102089	0.243537	1
HS_H3K27ac_10209	0.226783	0
HS_H3K27ac_102099	0.21562	0
HS_H3K27ac_102104	0.268403	0
HS_H3K27ac_102108	0.28084	0
HS_H3K27ac_10211	0.173047	0
HS_H3K27ac_102115	0.275622	0
HS_H3K27ac_102118	0.261044	0
HS_H3K27ac_102119	0.256659	0
HS_H3K27ac_10212	0.162924	0
HS_H3K27ac_102122	0.284298	1
HS_H3K27ac_102123	0.2902	0
HS_H3K27ac_102126	0.292524	0
HS_H3K27ac_102127	0.240898	1
HS_H3K27ac_102128	0.240057	0
HS_H3K27ac_10213	0.312303	0
HS_H3K27ac_102132	0.214106	1
HS_H3K27ac_102133	0.241483	0
HS_H3K27ac_102135	0.251938	0
HS_H3K27ac_102136	0.239356	0
HS_H3K27ac_10214	0.282434	0
HS_H3K27ac_102141	0.311224	0
HS_H3K27ac_102142	0.371429	0
HS_H3K27ac_102143	0.354312	0
HS_H3K27ac_102144	0.324742	0
HS_H3K27ac_102145	0.257844	0
HS_H3K27ac_10215	0.243151	0
HS_H3K27ac_102159	0.240506	0
HS_H3K27ac_10216	0.208627	0
HS_H3K27ac_102160	0.315655	0
HS_H3K27ac_102161	0.271698	0
HS_H3K27ac_102164	0.187179	0
HS_H3K27ac_102166	0.271154	0
HS_H3K27ac_102168	0.328536	0
HS_H3K27ac_102169	0.259222	0
HS_H3K27ac_10217	0.225851	0
HS_H3K27ac_102170	0.309893	0
HS_H3K27ac_102171	0.262656	0
HS_H3K27ac_102172	0.294255	0
HS_H3K27ac_102174	0.254677	0
HS_H3K27ac_102175	0.259635	0
HS_H3K27ac_102176	0.300108	0
HS_H3K27ac_102177	0.254879	0
HS_H3K27ac_10218	0.15352	0
HS_H3K27ac_102187	0.266472	0
HS_H3K27ac_102189	0.347767	0
HS_H3K27ac_10219	0.221707	0
HS_H3K27ac_102190	0.232033	0
HS_H3K27ac_102191	0.243335	0
HS_H3K27ac_102192	0.268566	0
HS_H3K27ac_102194	0.278824	0
HS_H3K27ac_102195	0.250331	0
HS_H3K27ac_102197	0.254651	0
HS_H3K27ac_10220	0.249873	0
HS_H3K27ac_102200	0.211288	0
HS_H3K27ac_102205	0.214588	0
HS_H3K27ac_102207	0.262883	0
HS_H3K27ac_102208	0.294697	0
HS_H3K27ac_102209	0.208924	0
HS_H3K27ac_102214	0.245353	1
HS_H3K27ac_102215	0.220603	0
HS_H3K27ac_102217	0.270349	0
HS_H3K27ac_102219	0.340192	0
HS_H3K27ac_102221	0.331655	0
HS_H3K27ac_102227	0.244244	0
HS_H3K27ac_102228	0.250653	1
HS_H3K27ac_102229	0.260131	1
HS_H3K27ac_102230	0.244069	0
HS_H3K27ac_102231	0.320755	0
HS_H3K27ac_102235	0.229481	0
HS_H3K27ac_10224	0.23777	1
HS_H3K27ac_10225	0.25	1
HS_H3K27ac_102252	0.200656	0
HS_H3K27ac_10226	0.268799	0
HS_H3K27ac_10227	0.25261	0
HS_H3K27ac_102276	0.256084	0
HS_H3K27ac_10228	0.214621	1
HS_H3K27ac_102287	0.326512	0
HS_H3K27ac_102288	0.289171	0
HS_H3K27ac_102289	0.273789	0
HS_H3K27ac_10229	0.220408	0
HS_H3K27ac_102291	0.271429	0
HS_H3K27ac_102292	0.302819	0
HS_H3K27ac_102293	0.263294	0
HS_H3K27ac_102295	0.292543	0
HS_H3K27ac_102299	0.262411	0
HS_H3K27ac_10230	0.293282	0
HS_H3K27ac_102300	0.281338	0
HS_H3K27ac_102304	0.20933	0
HS_H3K27ac_102305	0.232515	0
HS_H3K27ac_102306	0.261484	0
HS_H3K27ac_102307	0.251838	0
HS_H3K27ac_102309	0.243483	0
HS_H3K27ac_10231	0.268104	0
HS_H3K27ac_102310	0.250263	0
HS_H3K27ac_102311	0.28019	1
HS_H3K27ac_102312	0.267927	0
HS_H3K27ac_10232	0.292854	0
HS_H3K27ac_102340	0.276154	0
HS_H3K27ac_102341	0.235969	0
HS_H3K27ac_102342	0.265961	0
HS_H3K27ac_102364	0.322183	0
HS_H3K27ac_102365	0.2951	0
HS_H3K27ac_102382	0.136882	0
HS_H3K27ac_102384	0.236979	0
HS_H3K27ac_102385	0.213904	0
HS_H3K27ac_102386	0.255088	0
HS_H3K27ac_102387	0.283521	0
HS_H3K27ac_102391	0.273885	1
HS_H3K27ac_102392	0.303653	1
HS_H3K27ac_102393	0.291857	0
HS_H3K27ac_102398	0.12349	0
HS_H3K27ac_102408	0.20122	0
HS_H3K27ac_102417	0.290123	0
HS_H3K27ac_102418	0.216	0
HS_H3K27ac_102420	0.216032	0
HS_H3K27ac_102422	0.234043	0
HS_H3K27ac_102427	0.21242	0
HS_H3K27ac_102431	0.328106	0
HS_H3K27ac_102432	0.241236	0
HS_H3K27ac_102435	0.272164	0
HS_H3K27ac_102436	0.185701	0
HS_H3K27ac_102437	0.142857	1
HS_H3K27ac_102462	0.317811	1
HS_H3K27ac_102468	0.256254	1
HS_H3K27ac_102469	0.342732	0
HS_H3K27ac_102470	0.284133	0
HS_H3K27ac_102471	0.248804	0
HS_H3K27ac_102473	0.303245	0
HS_H3K27ac_102476	0.299395	0
HS_H3K27ac_102478	0.285294	0
HS_H3K27ac_10248	0.263317	0
HS_H3K27ac_102488	0.289671	0
HS_H3K27ac_102489	0.22235	0
HS_H3K27ac_10249	0.308155	0
HS_H3K27ac_102490	0.319842	0
HS_H3K27ac_102491	0.262115	0
HS_H3K27ac_102492	0.360825	0
HS_H3K27ac_102493	0.291911	0
HS_H3K27ac_102495	0.274894	0
HS_H3K27ac_102497	0.272868	0
HS_H3K27ac_102499	0.312645	0
HS_H3K27ac_102500	0.269409	0
HS_H3K27ac_102501	0.260226	0
HS_H3K27ac_102502	0.260646	0
HS_H3K27ac_102503	0.119318	0
HS_H3K27ac_102506	0.231682	0
HS_H3K27ac_102508	0.31241	0
HS_H3K27ac_102509	0.317557	0
HS_H3K27ac_102511	0.255924	0
HS_H3K27ac_102514	0.288868	0
HS_H3K27ac_102516	0.321135	0
HS_H3K27ac_102518	0.273832	0
HS_H3K27ac_102519	0.307438	0
HS_H3K27ac_102521	0.307266	1
HS_H3K27ac_102522	0.376963	1
HS_H3K27ac_102523	0.307323	0
HS_H3K27ac_102525	0.336527	0
HS_H3K27ac_102527	0.292445	0
HS_H3K27ac_102528	0.28777	1
HS_H3K27ac_102529	0.335126	0
HS_H3K27ac_102531	0.195748	0
HS_H3K27ac_102532	0.237162	0
HS_H3K27ac_102544	0.24466	1
HS_H3K27ac_102545	0.336239	0
HS_H3K27ac_102546	0.300633	0
HS_H3K27ac_102550	0.324042	0
HS_H3K27ac_102551	0.28289	0
HS_H3K27ac_102552	0.260538	0
HS_H3K27ac_102553	0.280546	0
HS_H3K27ac_102554	0.231246	0
HS_H3K27ac_102556	0.218531	0
HS_H3K27ac_102558	0.25447	0
HS_H3K27ac_102560	0.262751	0
HS_H3K27ac_102562	0.25846	0
HS_H3K27ac_102564	0.267081	0
HS_H3K27ac_10257	0.275779	0
HS_H3K27ac_102572	0.226363	0
HS_H3K27ac_102575	0.287408	0
HS_H3K27ac_102577	0.321601	0
HS_H3K27ac_10258	0.230084	0
HS_H3K27ac_102580	0.34125	0
HS_H3K27ac_102581	0.292224	0
HS_H3K27ac_102582	0.206897	1
HS_H3K27ac_102583	0.30009	0
HS_H3K27ac_102585	0.312346	0
HS_H3K27ac_102588	0.325963	0
HS_H3K27ac_102589	0.344828	0
HS_H3K27ac_10259	0.248923	0
HS_H3K27ac_102593	0.308522	0
HS_H3K27ac_102597	0.304119	0
HS_H3K27ac_1026	0.359769	0
HS_H3K27ac_102600	0.336721	0
HS_H3K27ac_102602	0.3	1
HS_H3K27ac_102603	0.11811	0
HS_H3K27ac_102604	0.348882	0
HS_H3K27ac_10261	0.137807	0
HS_H3K27ac_102612	0.237544	0
HS_H3K27ac_102615	0.271672	0
HS_H3K27ac_102616	0.26279	0
HS_H3K27ac_10262	0.255572	0
HS_H3K27ac_102623	0.313383	0
HS_H3K27ac_102629	0.269135	0
HS_H3K27ac_10263	0.252835	0
HS_H3K27ac_102632	0.238017	0
HS_H3K27ac_102634	0.248881	0
HS_H3K27ac_102635	0.298432	0
HS_H3K27ac_102638	0.342139	0
HS_H3K27ac_102639	0.263587	0
HS_H3K27ac_10264	0.25071	0
HS_H3K27ac_102640	0.241071	0
HS_H3K27ac_102647	0.231299	0
HS_H3K27ac_10266	0.302998	0
HS_H3K27ac_102662	0.266254	0
HS_H3K27ac_10267	0.254275	0
HS_H3K27ac_10268	0.198593	1
HS_H3K27ac_10269	0.246319	0
HS_H3K27ac_102691	0.255549	0
HS_H3K27ac_102692	0.316172	0
HS_H3K27ac_102696	0.282061	0
HS_H3K27ac_10270	0.227664	0
HS_H3K27ac_102701	0.261697	0
HS_H3K27ac_102706	0.200507	0
HS_H3K27ac_10271	0.299358	0
HS_H3K27ac_102714	0.234731	0
HS_H3K27ac_102717	0.293515	0
HS_H3K27ac_102718	0.292962	1
HS_H3K27ac_102728	0.195466	0
HS_H3K27ac_102730	0.286094	0
HS_H3K27ac_102731	0.254804	0
HS_H3K27ac_102732	0.223293	0
HS_H3K27ac_10274	0.352639	0
HS_H3K27ac_102746	0.235955	1
HS_H3K27ac_102747	0.228963	0
HS_H3K27ac_102758	0.275974	0
HS_H3K27ac_102760	0.317102	0
HS_H3K27ac_102762	0.210263	0
HS_H3K27ac_102763	0.182035	0
HS_H3K27ac_102764	0.267166	0
HS_H3K27ac_102766	0.183749	0
HS_H3K27ac_102770	0.220159	0
HS_H3K27ac_102772	0.29559	0
HS_H3K27ac_102775	0.287815	1
HS_H3K27ac_102785	0.244907	0
HS_H3K27ac_10280	0.260757	0
HS_H3K27ac_102802	0.213867	0
HS_H3K27ac_10281	0.160891	1
HS_H3K27ac_102817	0.287578	1
HS_H3K27ac_102818	0.262195	0
HS_H3K27ac_102819	0.280441	0
HS_H3K27ac_10282	0.0836364	0
HS_H3K27ac_10283	0.0744119	0
HS_H3K27ac_102836	0.266667	0
HS_H3K27ac_102837	0.304348	0
HS_H3K27ac_102838	0.213156	0
HS_H3K27ac_10284	0.296424	0
HS_H3K27ac_102840	0.290437	0
HS_H3K27ac_102842	0.253655	0
HS_H3K27ac_102843	0.233509	0
HS_H3K27ac_102854	0.249164	0
HS_H3K27ac_102860	0.214313	0
HS_H3K27ac_102862	0.228517	0
HS_H3K27ac_10287	0.283456	0
HS_H3K27ac_102872	0.186635	0
HS_H3K27ac_102875	0.246117	0
HS_H3K27ac_102882	0.306346	0
HS_H3K27ac_102883	0.263695	0
HS_H3K27ac_102884	0.257605	0
HS_H3K27ac_102886	0.25067	0
HS_H3K27ac_10289	0.302973	0
HS_H3K27ac_102905	0.28883	0
HS_H3K27ac_10291	0.296875	0
HS_H3K27ac_102910	0.202852	0
HS_H3K27ac_102911	0.262712	0
HS_H3K27ac_102913	0.210448	0
HS_H3K27ac_102914	0.290698	0
HS_H3K27ac_102917	0.260714	0
HS_H3K27ac_102919	0.201183	0
HS_H3K27ac_10292	0.293165	0
HS_H3K27ac_102920	0.275497	1
HS_H3K27ac_102925	0.243794	0
HS_H3K27ac_102926	0.280295	0
HS_H3K27ac_102929	0.245968	1
HS_H3K27ac_10293	0.281398	0
HS_H3K27ac_102930	0.25291	0
HS_H3K27ac_102933	0.210526	1
HS_H3K27ac_102934	0.130258	0
HS_H3K27ac_102937	0.246104	0
HS_H3K27ac_102939	0.153816	0
HS_H3K27ac_10294	0.328696	0
HS_H3K27ac_102940	0.184231	0
HS_H3K27ac_102944	0.184084	0
HS_H3K27ac_102945	0.254207	0
HS_H3K27ac_102947	0.158338	0
HS_H3K27ac_102949	0.137215	0
HS_H3K27ac_102951	0.14218	0
HS_H3K27ac_102954	0.176948	0
HS_H3K27ac_102958	0.225412	0
HS_H3K27ac_102963	0.173262	0
HS_H3K27ac_102965	0.266667	1
HS_H3K27ac_102966	0.202607	0
HS_H3K27ac_102969	0.259207	0
HS_H3K27ac_102971	0.325	0
HS_H3K27ac_102973	0.260573	0
HS_H3K27ac_102974	0.273798	0
HS_H3K27ac_10299	0.217252	0
HS_H3K27ac_103012	0.286469	0
HS_H3K27ac_103013	0.280772	1
HS_H3K27ac_103014	0.252371	0
HS_H3K27ac_103016	0.243644	0
HS_H3K27ac_103017	0.165001	0
HS_H3K27ac_103023	0.178879	0
HS_H3K27ac_103034	0.226835	0
HS_H3K27ac_103044	0.239435	0
HS_H3K27ac_103051	0.207055	0
HS_H3K27ac_103055	0.177211	0
HS_H3K27ac_103057	0.276524	0
HS_H3K27ac_103058	0.209484	0
HS_H3K27ac_103059	0.282903	0
HS_H3K27ac_103060	0.224679	0
HS_H3K27ac_103067	0.215593	0
HS_H3K27ac_103068	0.269681	1
HS_H3K27ac_103069	0.155238	0
HS_H3K27ac_10307	0.274252	0
HS_H3K27ac_103070	0.173567	0
HS_H3K27ac_103071	0.277883	0
HS_H3K27ac_103072	0.202252	1
HS_H3K27ac_103073	0.187482	0
HS_H3K27ac_103076	0.234611	0
HS_H3K27ac_103077	0.24124	0
HS_H3K27ac_103078	0.204789	1
HS_H3K27ac_103079	0.203512	0
HS_H3K27ac_10308	0.239278	0
HS_H3K27ac_103081	0.273497	0
HS_H3K27ac_103084	0.290246	0
HS_H3K27ac_103085	0.181632	0
HS_H3K27ac_10310	0.26998	0
HS_H3K27ac_10311	0.260143	0
HS_H3K27ac_103116	0.202903	0
HS_H3K27ac_10312	0.286412	0
HS_H3K27ac_103122	0.277706	0
HS_H3K27ac_103123	0.290323	0
HS_H3K27ac_103130	0.264835	0
HS_H3K27ac_103131	0.240016	0
HS_H3K27ac_103134	0.232357	0
HS_H3K27ac_103138	0.222386	0
HS_H3K27ac_10314	0.244378	0
HS_H3K27ac_103147	0.261069	0
HS_H3K27ac_103148	0.228086	0
HS_H3K27ac_103153	0.206307	0
HS_H3K27ac_103155	0.258105	0
HS_H3K27ac_103156	0.245829	0
HS_H3K27ac_103159	0.314189	1
HS_H3K27ac_10316	0.23943	0
HS_H3K27ac_103160	0.177163	0
HS_H3K27ac_103161	0.191307	0
HS_H3K27ac_103162	0.190523	0
HS_H3K27ac_103165	0.19026	0
HS_H3K27ac_103166	0.179464	0
HS_H3K27ac_103172	0.18883	0
HS_H3K27ac_103173	0.225486	0
HS_H3K27ac_103178	0.212993	0
HS_H3K27ac_103179	0.22185	0
HS_H3K27ac_10318	0.313594	0
HS_H3K27ac_103181	0.189514	0
HS_H3K27ac_103183	0.245302	0
HS_H3K27ac_103185	0.263139	0
HS_H3K27ac_103187	0.302883	0
HS_H3K27ac_10319	0.324532	0
HS_H3K27ac_103190	0.253902	0
HS_H3K27ac_103191	0.288751	0
HS_H3K27ac_103193	0.251957	0
HS_H3K27ac_103194	0.31082	1
HS_H3K27ac_103195	0.313039	1
HS_H3K27ac_103196	0.294756	1
HS_H3K27ac_103197	0.24631	0
HS_H3K27ac_103200	0.246411	0
HS_H3K27ac_103202	0.289938	0
HS_H3K27ac_103206	0.26351	0
HS_H3K27ac_103208	0.27913	0
HS_H3K27ac_10321	0.248852	0
HS_H3K27ac_103213	0.207298	0
HS_H3K27ac_103216	0.287966	1
HS_H3K27ac_103217	0.27541	0
HS_H3K27ac_103218	0.271095	1
HS_H3K27ac_103219	0.259093	0
HS_H3K27ac_10322	0.261273	0
HS_H3K27ac_103221	0.218033	0
HS_H3K27ac_103222	0.248395	1
HS_H3K27ac_103223	0.285375	0
HS_H3K27ac_103225	0.286769	0
HS_H3K27ac_103226	0.296367	0
HS_H3K27ac_103227	0.252669	0
HS_H3K27ac_103228	0.241445	0
HS_H3K27ac_103229	0.213237	0
HS_H3K27ac_10323	0.262712	1
HS_H3K27ac_103232	0.290285	0
HS_H3K27ac_103233	0.24459	0
HS_H3K27ac_103234	0.228809	0
HS_H3K27ac_103238	0.299475	1
HS_H3K27ac_103239	0.276817	0
HS_H3K27ac_10324	0.27874	0
HS_H3K27ac_103242	0.292624	1
HS_H3K27ac_103243	0.287234	0
HS_H3K27ac_103245	0.28296	1
HS_H3K27ac_103246	0.219623	0
HS_H3K27ac_103248	0.26222	0
HS_H3K27ac_10325	0.250232	0
HS_H3K27ac_103250	0.279274	1
HS_H3K27ac_103251	0.30464	1
HS_H3K27ac_103252	0.2936	0
HS_H3K27ac_103253	0.285181	0
HS_H3K27ac_103254	0.228045	0
HS_H3K27ac_103255	0.284003	0
HS_H3K27ac_103257	0.268149	0
HS_H3K27ac_10326	0.227785	0
HS_H3K27ac_103261	0.293158	1
HS_H3K27ac_103262	0.254658	0
HS_H3K27ac_103264	0.277639	0
HS_H3K27ac_10327	0.221637	0
HS_H3K27ac_103272	0.241905	0
HS_H3K27ac_103276	0.300961	0
HS_H3K27ac_103277	0.286506	0
HS_H3K27ac_103278	0.266752	0
HS_H3K27ac_103279	0.256104	1
HS_H3K27ac_103280	0.260635	0
HS_H3K27ac_103282	0.224347	0
HS_H3K27ac_10329	0.237826	0
HS_H3K27ac_103290	0.124138	0
HS_H3K27ac_103291	0.23146	0
HS_H3K27ac_103292	0.172884	0
HS_H3K27ac_103293	0.266329	0
HS_H3K27ac_103294	0.277092	0
HS_H3K27ac_10330	0.225371	1
HS_H3K27ac_103300	0.240602	1
HS_H3K27ac_103301	0.107231	0
HS_H3K27ac_103302	0.248086	0
HS_H3K27ac_103305	0.261011	0
HS_H3K27ac_103308	0.240771	1
HS_H3K27ac_103309	0.264437	0
HS_H3K27ac_10331	0.203371	0
HS_H3K27ac_103311	0.259127	0
HS_H3K27ac_103314	0.266091	0
HS_H3K27ac_103315	0.269231	0
HS_H3K27ac_103316	0.247828	1
HS_H3K27ac_103317	0.194622	0
HS_H3K27ac_103318	0.27492	0
HS_H3K27ac_103319	0.21273	0
HS_H3K27ac_10332	0.248162	0
HS_H3K27ac_103327	0.215708	1
HS_H3K27ac_103339	0.188456	0
HS_H3K27ac_103345	0.205071	0
HS_H3K27ac_103347	0.235467	0
HS_H3K27ac_10335	0.27242	1
HS_H3K27ac_103355	0.18737	0
HS_H3K27ac_103359	0.228669	0
HS_H3K27ac_10336	0.186047	0
HS_H3K27ac_103360	0.288462	1
HS_H3K27ac_103361	0.273333	0
HS_H3K27ac_103362	0.299608	0
HS_H3K27ac_103363	0.3125	0
HS_H3K27ac_103364	0.308389	0
HS_H3K27ac_103365	0.260905	0
HS_H3K27ac_103368	0.249691	0
HS_H3K27ac_103369	0.286392	0
HS_H3K27ac_10337	0.290134	0
HS_H3K27ac_103370	0.275549	0
HS_H3K27ac_103371	0.306122	0
HS_H3K27ac_103373	0.272675	0
HS_H3K27ac_103375	0.232898	0
HS_H3K27ac_103381	0.281298	0
HS_H3K27ac_10339	0.286814	0
HS_H3K27ac_103390	0.274218	0
HS_H3K27ac_103391	0.287215	0
HS_H3K27ac_103395	0.336875	0
HS_H3K27ac_103396	0.307375	1
HS_H3K27ac_103397	0.27697	0
HS_H3K27ac_103398	0.253459	0
HS_H3K27ac_103400	0.309436	0
HS_H3K27ac_103401	0.237741	0
HS_H3K27ac_103402	0.21375	0
HS_H3K27ac_103403	0.281118	0
HS_H3K27ac_103405	0.308111	0
HS_H3K27ac_103406	0.311157	0
HS_H3K27ac_103407	0.293296	0
HS_H3K27ac_103409	0.309771	1
HS_H3K27ac_10341	0.346129	0
HS_H3K27ac_103410	0.271084	1
HS_H3K27ac_103411	0.282869	0
HS_H3K27ac_103412	0.237333	0
HS_H3K27ac_103413	0.297548	0
HS_H3K27ac_103418	0.267787	0
HS_H3K27ac_10342	0.340415	0
HS_H3K27ac_103424	0.290323	1
HS_H3K27ac_103425	0.247352	0
HS_H3K27ac_103426	0.248626	0
HS_H3K27ac_103428	0.288264	0
HS_H3K27ac_103433	0.254664	0
HS_H3K27ac_103442	0.217662	0
HS_H3K27ac_103444	0.243262	0
HS_H3K27ac_103445	0.216837	1
HS_H3K27ac_103446	0.224434	0
HS_H3K27ac_103447	0.277254	0
HS_H3K27ac_103448	0.247169	0
HS_H3K27ac_103452	0.250952	0
HS_H3K27ac_103456	0.246181	0
HS_H3K27ac_103457	0.256024	1
HS_H3K27ac_103458	0.244503	0
HS_H3K27ac_10346	0.313093	0
HS_H3K27ac_103460	0.252444	0
HS_H3K27ac_103463	0.259564	0
HS_H3K27ac_103465	0.286741	0
HS_H3K27ac_10347	0.257586	0
HS_H3K27ac_103470	0.241057	0
HS_H3K27ac_103472	0.325629	0
HS_H3K27ac_103473	0.238228	0
HS_H3K27ac_10348	0.267425	0
HS_H3K27ac_103484	0.244974	0
HS_H3K27ac_103486	0.257916	0
HS_H3K27ac_103488	0.275044	1
HS_H3K27ac_103489	0.323141	0
HS_H3K27ac_10349	0.315089	0
HS_H3K27ac_103490	0.267008	0
HS_H3K27ac_103491	0.250053	0
HS_H3K27ac_103495	0.315959	1
HS_H3K27ac_103496	0.265796	0
HS_H3K27ac_103499	0.234217	0
HS_H3K27ac_103500	0.247007	0
HS_H3K27ac_103501	0.252294	1
HS_H3K27ac_103502	0.255587	0
HS_H3K27ac_103505	0.267108	0
HS_H3K27ac_103506	0.215912	0
HS_H3K27ac_103531	0.244138	0
HS_H3K27ac_103536	0.266201	0
HS_H3K27ac_103537	0.263776	0
HS_H3K27ac_103539	0.205602	0
HS_H3K27ac_103540	0.250048	0
HS_H3K27ac_103557	0.247508	0
HS_H3K27ac_10356	0.316032	0
HS_H3K27ac_10357	0.266491	1
HS_H3K27ac_103574	0.138542	0
HS_H3K27ac_103575	0.0940767	0
HS_H3K27ac_103576	0.290323	0
HS_H3K27ac_103578	0.237389	0
HS_H3K27ac_103579	0.291782	0
HS_H3K27ac_10358	0.194332	0
HS_H3K27ac_103580	0.158784	1
HS_H3K27ac_103583	0.284935	0
HS_H3K27ac_103584	0.324897	0
HS_H3K27ac_103586	0.281745	0
HS_H3K27ac_103589	0.25	1
HS_H3K27ac_103590	0.215625	0
HS_H3K27ac_103591	0.258168	0
HS_H3K27ac_103609	0.224109	0
HS_H3K27ac_103614	0.257861	0
HS_H3K27ac_103617	0.277778	0
HS_H3K27ac_103633	0.256903	0
HS_H3K27ac_103634	0.288303	0
HS_H3K27ac_103635	0.268224	0
HS_H3K27ac_103636	0.230885	0
HS_H3K27ac_103637	0.275887	0
HS_H3K27ac_103638	0.334869	0
HS_H3K27ac_103639	0.268269	0
HS_H3K27ac_103641	0.253538	0
HS_H3K27ac_103642	0.286011	1
HS_H3K27ac_103643	0.23662	0
HS_H3K27ac_103644	0.292471	0
HS_H3K27ac_103648	0.253882	0
HS_H3K27ac_103654	0.243156	0
HS_H3K27ac_103656	0.276959	0
HS_H3K27ac_103657	0.285501	0
HS_H3K27ac_103660	0.300274	0
HS_H3K27ac_103663	0.220357	0
HS_H3K27ac_103666	0.237726	0
HS_H3K27ac_103667	0.273261	0
HS_H3K27ac_103669	0.241703	0
HS_H3K27ac_103670	0.291464	0
HS_H3K27ac_103673	0.269737	0
HS_H3K27ac_103674	0.323348	0
HS_H3K27ac_103677	0.261307	0
HS_H3K27ac_10368	0.262435	0
HS_H3K27ac_10369	0.318828	0
HS_H3K27ac_103698	0.230769	0
HS_H3K27ac_103699	0.243669	0
HS_H3K27ac_10370	0.251839	0
HS_H3K27ac_103700	0.16595	0
HS_H3K27ac_103703	0.260694	0
HS_H3K27ac_103704	0.251393	0
HS_H3K27ac_103705	0.281974	0
HS_H3K27ac_103706	0.265035	0
HS_H3K27ac_103707	0.295105	0
HS_H3K27ac_103708	0.296296	0
HS_H3K27ac_103709	0.25	1
HS_H3K27ac_10371	0.234969	0
HS_H3K27ac_103710	0.273092	0
HS_H3K27ac_103711	0.313939	0
HS_H3K27ac_103712	0.346656	0
HS_H3K27ac_103713	0.302769	0
HS_H3K27ac_103714	0.22883	0
HS_H3K27ac_103715	0.279232	0
HS_H3K27ac_103716	0.300678	1
HS_H3K27ac_103717	0.187467	1
HS_H3K27ac_103718	0.225456	0
HS_H3K27ac_10372	0.246575	1
HS_H3K27ac_103720	0.32185	0
HS_H3K27ac_103721	0.303607	0
HS_H3K27ac_103725	0.261465	0
HS_H3K27ac_103726	0.277719	0
HS_H3K27ac_10373	0.247511	0
HS_H3K27ac_103732	0.35941	0
HS_H3K27ac_103735	0.303172	0
HS_H3K27ac_103737	0.331273	0
HS_H3K27ac_103738	0.27044	0
HS_H3K27ac_103739	0.236807	0
HS_H3K27ac_103740	0.28125	0
HS_H3K27ac_103741	0.252265	0
HS_H3K27ac_103742	0.295918	0
HS_H3K27ac_103743	0.271689	0
HS_H3K27ac_103745	0.273728	0
HS_H3K27ac_103746	0.226787	0
HS_H3K27ac_103747	0.319814	0
HS_H3K27ac_103749	0.26838	0
HS_H3K27ac_103752	0.208477	0
HS_H3K27ac_103753	0.182273	0
HS_H3K27ac_103755	0.230741	0
HS_H3K27ac_103758	0.27139	0
HS_H3K27ac_103759	0.223692	0
HS_H3K27ac_10376	0.290411	0
HS_H3K27ac_103760	0.268414	0
HS_H3K27ac_103761	0.218154	0
HS_H3K27ac_103762	0.22235	0
HS_H3K27ac_103763	0.2825	0
HS_H3K27ac_103764	0.312588	0
HS_H3K27ac_103766	0.156643	0
HS_H3K27ac_103767	0.316724	0
HS_H3K27ac_103769	0.214556	0
HS_H3K27ac_103771	0.235393	0
HS_H3K27ac_103772	0.254105	0
HS_H3K27ac_103773	0.234363	0
HS_H3K27ac_103775	0.230228	0
HS_H3K27ac_103776	0.254967	0
HS_H3K27ac_10378	0.279221	0
HS_H3K27ac_103781	0.27293	0
HS_H3K27ac_103782	0.232097	0
HS_H3K27ac_103783	0.275405	0
HS_H3K27ac_103789	0.171013	0
HS_H3K27ac_103790	0.182033	0
HS_H3K27ac_103795	0.2175	0
HS_H3K27ac_103796	0.236747	0
HS_H3K27ac_103797	0.251893	0
HS_H3K27ac_103798	0.225821	0
HS_H3K27ac_103799	0.21374	0
HS_H3K27ac_10380	0.312102	1
HS_H3K27ac_10381	0.228801	0
HS_H3K27ac_103818	0.222314	0
HS_H3K27ac_103819	0.241621	0
HS_H3K27ac_103820	0.270004	0
HS_H3K27ac_103822	0.26006	0
HS_H3K27ac_103823	0.254007	0
HS_H3K27ac_103824	0.296392	0
HS_H3K27ac_103825	0.241615	0
HS_H3K27ac_103826	0.244375	1
HS_H3K27ac_103827	0.269868	0
HS_H3K27ac_103829	0.250199	0
HS_H3K27ac_10383	0.217699	0
HS_H3K27ac_103830	0.207167	0
HS_H3K27ac_103833	0.231521	0
HS_H3K27ac_103834	0.239882	0
HS_H3K27ac_103835	0.273855	0
HS_H3K27ac_103837	0.272597	0
HS_H3K27ac_103838	0.25641	0
HS_H3K27ac_103840	0.21313	0
HS_H3K27ac_103842	0.226758	1
HS_H3K27ac_103843	0.273994	0
HS_H3K27ac_103846	0.268146	0
HS_H3K27ac_103848	0.23788	0
HS_H3K27ac_103849	0.24732	0
HS_H3K27ac_10385	0.290862	0
HS_H3K27ac_103850	0.239661	0
HS_H3K27ac_103852	0.209169	0
HS_H3K27ac_103854	0.241501	0
HS_H3K27ac_103855	0.29589	0
HS_H3K27ac_103859	0.300161	0
HS_H3K27ac_103861	0.247399	0
HS_H3K27ac_103863	0.280992	0
HS_H3K27ac_103864	0.289404	0
HS_H3K27ac_103865	0.274691	0
HS_H3K27ac_103866	0.296572	0
HS_H3K27ac_103867	0.225146	0
HS_H3K27ac_103868	0.261694	0
HS_H3K27ac_103869	0.253924	0
HS_H3K27ac_103870	0.258238	0
HS_H3K27ac_103873	0.264271	0
HS_H3K27ac_103874	0.327177	0
HS_H3K27ac_103875	0.215449	0
HS_H3K27ac_103876	0.252101	0
HS_H3K27ac_103877	0.248777	1
HS_H3K27ac_103878	0.17714	0
HS_H3K27ac_103879	0.290526	0
HS_H3K27ac_10388	0.017316	0
HS_H3K27ac_103880	0.292067	1
HS_H3K27ac_103881	0.273239	0
HS_H3K27ac_103882	0.322167	1
HS_H3K27ac_103883	0.208319	0
HS_H3K27ac_103885	0.247397	0
HS_H3K27ac_103888	0.266334	0
HS_H3K27ac_103889	0.263487	0
HS_H3K27ac_10389	0.230214	0
HS_H3K27ac_103890	0.19526	0
HS_H3K27ac_103895	0.328326	0
HS_H3K27ac_103896	0.367228	0
HS_H3K27ac_103907	0.304825	0
HS_H3K27ac_103908	0.316943	0
HS_H3K27ac_103913	0.319176	0
HS_H3K27ac_103917	0.260892	0
HS_H3K27ac_103921	0.231092	0
HS_H3K27ac_103923	0.171665	1
HS_H3K27ac_103924	0.285766	0
HS_H3K27ac_103926	0.207681	0
HS_H3K27ac_103927	0.157566	0
HS_H3K27ac_103928	0.215884	0
HS_H3K27ac_103929	0.307797	1
HS_H3K27ac_103930	0.347503	0
HS_H3K27ac_103931	0.278503	0
HS_H3K27ac_103932	0.112608	0
HS_H3K27ac_103933	0.286926	0
HS_H3K27ac_103934	0.29604	0
HS_H3K27ac_103935	0.346756	0
HS_H3K27ac_103936	0.129363	0
HS_H3K27ac_103945	0.174373	0
HS_H3K27ac_103954	0.207002	0
HS_H3K27ac_103955	0.227672	0
HS_H3K27ac_103956	0.233227	0
HS_H3K27ac_103957	0.179348	0
HS_H3K27ac_103958	0.274329	0
HS_H3K27ac_103959	0.200637	0
HS_H3K27ac_103961	0.155806	1
HS_H3K27ac_103963	0.227435	0
HS_H3K27ac_103967	0.193043	0
HS_H3K27ac_103968	0.184567	1
HS_H3K27ac_103970	0.256732	0
HS_H3K27ac_103971	0.264126	0
HS_H3K27ac_103972	0.184082	0
HS_H3K27ac_103975	0.191611	0
HS_H3K27ac_103977	0.267704	0
HS_H3K27ac_103978	0.229592	0
HS_H3K27ac_103981	0.230858	0
HS_H3K27ac_103982	0.225472	0
HS_H3K27ac_103983	0.233408	0
HS_H3K27ac_103984	0.253243	0
HS_H3K27ac_103985	0.309789	0
HS_H3K27ac_103986	0.292848	0
HS_H3K27ac_103990	0.294835	0
HS_H3K27ac_103992	0.28563	0
HS_H3K27ac_103993	0.290112	0
HS_H3K27ac_103994	0.323961	0
HS_H3K27ac_103996	0.325751	0
HS_H3K27ac_103999	0.353846	0
HS_H3K27ac_104000	0.30717	0
HS_H3K27ac_104001	0.296233	0
HS_H3K27ac_104002	0.265174	0
HS_H3K27ac_104004	0.286621	1
HS_H3K27ac_104005	0.283832	0
HS_H3K27ac_104006	0.290532	0
HS_H3K27ac_104007	0.262041	0
HS_H3K27ac_104008	0.276966	0
HS_H3K27ac_104009	0.241826	0
HS_H3K27ac_104010	0.22026	0
HS_H3K27ac_104011	0.196888	0
HS_H3K27ac_104012	0.25644	1
HS_H3K27ac_104013	0.211388	0
HS_H3K27ac_10402	0.237752	0
HS_H3K27ac_104027	0.235178	0
HS_H3K27ac_104028	0.22486	0
HS_H3K27ac_104029	0.243692	0
HS_H3K27ac_10403	0.254753	0
HS_H3K27ac_104030	0.202091	1
HS_H3K27ac_104031	0.299486	0
HS_H3K27ac_104032	0.220605	0
HS_H3K27ac_104033	0.209882	0
HS_H3K27ac_104044	0.193306	0
HS_H3K27ac_104045	0.146905	0
HS_H3K27ac_104046	0.223003	0
HS_H3K27ac_104047	0.138242	0
HS_H3K27ac_104048	0.212677	0
HS_H3K27ac_104049	0.0833333	0
HS_H3K27ac_10405	0.293862	1
HS_H3K27ac_104050	0.171937	0
HS_H3K27ac_104051	0.282563	0
HS_H3K27ac_104052	0.154171	0
HS_H3K27ac_104053	0.205087	0
HS_H3K27ac_104054	0.171701	0
HS_H3K27ac_104055	0.0970258	0
HS_H3K27ac_104056	0.268537	0
HS_H3K27ac_104057	0.173605	0
HS_H3K27ac_104058	0.262875	0
HS_H3K27ac_104059	0.157395	0
HS_H3K27ac_104061	0.284443	0
HS_H3K27ac_104066	0.292609	1
HS_H3K27ac_104067	0.260446	1
HS_H3K27ac_104071	0.282225	0
HS_H3K27ac_104074	0.262716	0
HS_H3K27ac_104075	0.350614	0
HS_H3K27ac_104080	0.287349	1
HS_H3K27ac_104090	0.216533	0
HS_H3K27ac_104091	0.295845	1
HS_H3K27ac_104094	0.263716	0
HS_H3K27ac_10410	0.260963	0
HS_H3K27ac_104109	0.297729	0
HS_H3K27ac_104110	0.272216	0
HS_H3K27ac_104112	0.300469	0
HS_H3K27ac_104113	0.221053	0
HS_H3K27ac_104115	0.238205	0
HS_H3K27ac_10412	0.176407	0
HS_H3K27ac_104120	0.237395	0
HS_H3K27ac_104121	0.267458	0
HS_H3K27ac_104122	0.183028	0
HS_H3K27ac_104123	0.286694	1
HS_H3K27ac_104124	0.231047	0
HS_H3K27ac_104125	0.236527	1
HS_H3K27ac_104131	0.134076	1
HS_H3K27ac_104132	0.219346	0
HS_H3K27ac_104133	0.221696	0
HS_H3K27ac_104134	0.187143	0
HS_H3K27ac_104135	0.290186	0
HS_H3K27ac_104137	0.281132	0
HS_H3K27ac_104138	0.235398	0
HS_H3K27ac_104139	0.30137	0
HS_H3K27ac_10414	0.112903	1
HS_H3K27ac_104140	0.209584	0
HS_H3K27ac_10415	0.288708	0
HS_H3K27ac_10418	0.236491	0
HS_H3K27ac_104182	0.293431	0
HS_H3K27ac_104184	0.179292	1
HS_H3K27ac_104187	0.333333	0
HS_H3K27ac_104188	0.288967	1
HS_H3K27ac_104190	0.337047	0
HS_H3K27ac_104194	0.272875	0
HS_H3K27ac_104195	0.299296	0
HS_H3K27ac_104205	0.293487	0
HS_H3K27ac_104207	0.282726	0
HS_H3K27ac_104226	0.356582	0
HS_H3K27ac_104230	0.145126	0
HS_H3K27ac_104233	0.388017	0
HS_H3K27ac_104236	0.286015	1
HS_H3K27ac_10424	0.226675	0
HS_H3K27ac_104240	0.248782	1
HS_H3K27ac_104245	0.179779	0
HS_H3K27ac_104250	0.212835	0
HS_H3K27ac_104251	0.292696	1
HS_H3K27ac_104269	0.314363	0
HS_H3K27ac_104279	0.282116	0
HS_H3K27ac_10428	0.23784	0
HS_H3K27ac_104284	0.314634	0
HS_H3K27ac_104285	0.276577	0
HS_H3K27ac_104286	0.235925	0
HS_H3K27ac_104287	0.257192	0
HS_H3K27ac_104288	0.331625	0
HS_H3K27ac_104289	0.322344	1
HS_H3K27ac_10429	0.24148	0
HS_H3K27ac_104298	0.418495	1
HS_H3K27ac_104299	0.185511	0
HS_H3K27ac_10430	0.264819	0
HS_H3K27ac_104300	0.0808436	0
HS_H3K27ac_104301	0.284293	0
HS_H3K27ac_104302	0.222772	0
HS_H3K27ac_104303	0.19215	0
HS_H3K27ac_104304	0.259411	0
HS_H3K27ac_104309	0.324176	0
HS_H3K27ac_10431	0.239484	0
HS_H3K27ac_104315	0.27907	1
HS_H3K27ac_104318	0.264312	0
HS_H3K27ac_10432	0.213783	0
HS_H3K27ac_104320	0.293307	0
HS_H3K27ac_104323	0.436831	1
HS_H3K27ac_104330	0.268359	0
HS_H3K27ac_104336	0.283875	0
HS_H3K27ac_104338	0.41369	1
HS_H3K27ac_104339	0.220189	0
HS_H3K27ac_10434	0.279412	0
HS_H3K27ac_104340	0.209222	0
HS_H3K27ac_104341	0.253298	1
HS_H3K27ac_104342	0.285076	0
HS_H3K27ac_104344	0.292551	0
HS_H3K27ac_104346	0.267007	0
HS_H3K27ac_104347	0.238971	0
HS_H3K27ac_104348	0.313152	0
HS_H3K27ac_104356	0.331384	0
HS_H3K27ac_104357	0.269231	0
HS_H3K27ac_10436	0.226474	0
HS_H3K27ac_104360	0.291244	1
HS_H3K27ac_104361	0.4375	1
HS_H3K27ac_104364	0.361538	1
HS_H3K27ac_104370	0.278146	0
HS_H3K27ac_104371	0.311633	1
HS_H3K27ac_104372	0.303725	0
HS_H3K27ac_104373	0.291538	0
HS_H3K27ac_104375	0.293958	0
HS_H3K27ac_104377	0.193115	0
HS_H3K27ac_104378	0.319522	0
HS_H3K27ac_104379	0.256892	1
HS_H3K27ac_104380	0.317507	1
HS_H3K27ac_104382	0.353354	0
HS_H3K27ac_104384	0.185185	0
HS_H3K27ac_104385	0.250213	0
HS_H3K27ac_104390	0.322581	0
HS_H3K27ac_104391	0.234932	0
HS_H3K27ac_104393	0.126038	0
HS_H3K27ac_104396	0.268554	0
HS_H3K27ac_104398	0.260146	0
HS_H3K27ac_104401	0.175505	1
HS_H3K27ac_104402	0.219892	0
HS_H3K27ac_104403	0.263636	1
HS_H3K27ac_104405	0.273154	0
HS_H3K27ac_104406	0.254116	0
HS_H3K27ac_104407	0.2804	0
HS_H3K27ac_104412	0.198113	1
HS_H3K27ac_104420	0.228484	0
HS_H3K27ac_104427	0.375587	0
HS_H3K27ac_104429	0.245568	0
HS_H3K27ac_104430	0.276157	0
HS_H3K27ac_104431	0.320951	0
HS_H3K27ac_104434	0.292189	0
HS_H3K27ac_104435	0.253598	0
HS_H3K27ac_104436	0.270905	0
HS_H3K27ac_104437	0.283297	0
HS_H3K27ac_104438	0.300654	0
HS_H3K27ac_104439	0.206587	0
HS_H3K27ac_104440	0.222672	0
HS_H3K27ac_104446	0.132994	0
HS_H3K27ac_104450	0.365721	0
HS_H3K27ac_104453	0.207036	1
HS_H3K27ac_104454	0.267284	0
HS_H3K27ac_104455	0.277778	0
HS_H3K27ac_104456	0.318045	0
HS_H3K27ac_104457	0.259405	0
HS_H3K27ac_104462	0.276311	0
HS_H3K27ac_104464	0.266156	0
HS_H3K27ac_104466	0.235572	0
HS_H3K27ac_104469	0.207333	0
HS_H3K27ac_10448	0.239742	0
HS_H3K27ac_104481	0.2052	0
HS_H3K27ac_104482	0.305866	0
HS_H3K27ac_104483	0.259934	0
HS_H3K27ac_104486	0.266234	0
HS_H3K27ac_104490	0.0881489	0
HS_H3K27ac_104491	0.158256	0
HS_H3K27ac_104492	0.269868	0
HS_H3K27ac_104493	0.265973	0
HS_H3K27ac_104494	0.309645	1
HS_H3K27ac_104495	0.179503	0
HS_H3K27ac_104496	0.224073	0
HS_H3K27ac_104501	0.254325	0
HS_H3K27ac_104502	0.255153	0
HS_H3K27ac_104503	0.283854	1
HS_H3K27ac_104504	0.281369	0
HS_H3K27ac_104505	0.198827	1
HS_H3K27ac_104506	0.246094	1
HS_H3K27ac_104507	0.260024	0
HS_H3K27ac_104508	0.309932	1
HS_H3K27ac_104510	0.154682	0
HS_H3K27ac_104514	0.228334	1
HS_H3K27ac_104520	0.349741	0
HS_H3K27ac_104521	0.296997	0
HS_H3K27ac_104522	0.312016	1
HS_H3K27ac_104523	0.309511	0
HS_H3K27ac_104525	0.194348	0
HS_H3K27ac_104526	0.315901	0
HS_H3K27ac_104527	0.311247	0
HS_H3K27ac_104528	0.225466	0
HS_H3K27ac_104529	0.185768	0
HS_H3K27ac_104530	0.197483	0
HS_H3K27ac_104531	0.231439	0
HS_H3K27ac_104532	0.291362	0
HS_H3K27ac_104533	0.276858	0
HS_H3K27ac_104537	0.204204	0
HS_H3K27ac_104538	0.283302	0
HS_H3K27ac_104539	0.24684	0
HS_H3K27ac_104540	0.2092	1
HS_H3K27ac_104541	0.178808	0
HS_H3K27ac_104542	0.233986	1
HS_H3K27ac_104543	0.277968	1
HS_H3K27ac_104544	0.349475	0
HS_H3K27ac_104545	0.230769	0
HS_H3K27ac_104547	0.276659	0
HS_H3K27ac_104548	0.189591	0
HS_H3K27ac_104549	0.284823	1
HS_H3K27ac_10455	0.29714	0
HS_H3K27ac_104551	0.269982	0
HS_H3K27ac_104552	0.319363	0
HS_H3K27ac_104556	0.265938	0
HS_H3K27ac_104557	0.254861	0
HS_H3K27ac_104558	0.215498	0
HS_H3K27ac_10456	0.260404	0
HS_H3K27ac_104561	0.215385	0
HS_H3K27ac_104563	0.241584	0
HS_H3K27ac_104564	0.270408	0
HS_H3K27ac_10457	0.197419	0
HS_H3K27ac_104571	0.220351	0
HS_H3K27ac_104572	0.274156	1
HS_H3K27ac_104573	0.258919	0
HS_H3K27ac_104575	0.262774	0
HS_H3K27ac_104576	0.288478	0
HS_H3K27ac_104578	0.285049	0
HS_H3K27ac_104579	0.262643	1
HS_H3K27ac_10458	0.242841	0
HS_H3K27ac_104581	0.249708	0
HS_H3K27ac_104586	0.301587	1
HS_H3K27ac_104589	0.169095	0
HS_H3K27ac_10459	0.288474	1
HS_H3K27ac_104590	0.237087	0
HS_H3K27ac_104591	0.288639	0
HS_H3K27ac_104592	0.282561	0
HS_H3K27ac_104594	0.221402	0
HS_H3K27ac_104595	0.234245	0
HS_H3K27ac_104597	0.224225	0
HS_H3K27ac_104599	0.29064	1
HS_H3K27ac_10460	0.201174	0
HS_H3K27ac_104600	0.323746	1
HS_H3K27ac_104601	0.240645	0
HS_H3K27ac_104602	0.17028	1
HS_H3K27ac_104603	0.132447	1
HS_H3K27ac_104604	0.274074	0
HS_H3K27ac_104609	0.250526	0
HS_H3K27ac_10461	0.194631	0
HS_H3K27ac_104610	0.189048	0
HS_H3K27ac_104611	0.290083	0
HS_H3K27ac_104612	0.241827	0
HS_H3K27ac_10462	0.371469	1
HS_H3K27ac_104620	0.237001	0
HS_H3K27ac_104623	0.241411	0
HS_H3K27ac_104624	0.245411	0
HS_H3K27ac_104625	0.243447	0
HS_H3K27ac_104629	0.233078	0
HS_H3K27ac_10463	0.320231	0
HS_H3K27ac_104630	0.271631	0
HS_H3K27ac_104631	0.255973	0
HS_H3K27ac_104632	0.288278	1
HS_H3K27ac_104633	0.312299	1
HS_H3K27ac_104634	0.275318	0
HS_H3K27ac_104635	0.244494	0
HS_H3K27ac_104637	0.275436	0
HS_H3K27ac_104638	0.288777	0
HS_H3K27ac_10464	0.364763	0
HS_H3K27ac_104640	0.255165	1
HS_H3K27ac_104641	0.2486	0
HS_H3K27ac_104642	0.254613	0
HS_H3K27ac_104643	0.221319	0
HS_H3K27ac_104644	0.247473	0
HS_H3K27ac_104645	0.249223	0
HS_H3K27ac_104647	0.252828	0
HS_H3K27ac_104648	0.249346	0
HS_H3K27ac_104651	0.239085	0
HS_H3K27ac_104653	0.293582	0
HS_H3K27ac_104655	0.291083	0
HS_H3K27ac_104656	0.299519	1
HS_H3K27ac_104657	0.235968	0
HS_H3K27ac_104658	0.265273	0
HS_H3K27ac_104660	0.270583	0
HS_H3K27ac_104662	0.249652	0
HS_H3K27ac_104663	0.293464	0
HS_H3K27ac_104666	0.307839	1
HS_H3K27ac_104667	0.306569	0
HS_H3K27ac_104668	0.293595	0
HS_H3K27ac_104669	0.310987	0
HS_H3K27ac_104671	0.327121	0
HS_H3K27ac_104675	0.283046	1
HS_H3K27ac_104676	0.267563	0
HS_H3K27ac_104678	0.254696	0
HS_H3K27ac_104679	0.250306	0
HS_H3K27ac_104682	0.261126	0
HS_H3K27ac_104684	0.234531	0
HS_H3K27ac_104685	0.249485	0
HS_H3K27ac_104686	0.314613	0
HS_H3K27ac_104687	0.312519	0
HS_H3K27ac_104690	0.306731	0
HS_H3K27ac_104692	0.308689	0
HS_H3K27ac_104693	0.306524	0
HS_H3K27ac_104695	0.327032	0
HS_H3K27ac_104696	0.300583	1
HS_H3K27ac_104697	0.303898	0
HS_H3K27ac_104699	0.361202	0
HS_H3K27ac_104701	0.269161	0
HS_H3K27ac_104702	0.30142	0
HS_H3K27ac_104708	0.293651	0
HS_H3K27ac_104709	0.280543	0
HS_H3K27ac_10471	0.223913	1
HS_H3K27ac_104710	0.254893	0
HS_H3K27ac_104715	0.303057	0
HS_H3K27ac_104718	0.241206	0
HS_H3K27ac_104719	0.281768	0
HS_H3K27ac_10472	0.213142	0
HS_H3K27ac_104720	0.261029	0
HS_H3K27ac_104721	0.338473	0
HS_H3K27ac_104722	0.267208	0
HS_H3K27ac_104724	0.251002	1
HS_H3K27ac_104725	0.263171	0
HS_H3K27ac_104729	0.252207	0
HS_H3K27ac_104730	0.281618	0
HS_H3K27ac_104731	0.314258	0
HS_H3K27ac_104733	0.249304	0
HS_H3K27ac_104734	0.299899	1
HS_H3K27ac_104735	0.321263	1
HS_H3K27ac_104736	0.2275	0
HS_H3K27ac_104739	0.256555	0
HS_H3K27ac_10474	0.209459	1
HS_H3K27ac_104741	0.289365	0
HS_H3K27ac_104744	0.27337	0
HS_H3K27ac_104746	0.268895	0
HS_H3K27ac_104747	0.262388	0
HS_H3K27ac_104749	0.190825	0
HS_H3K27ac_10475	0.198134	0
HS_H3K27ac_104750	0.25045	0
HS_H3K27ac_104754	0.270188	0
HS_H3K27ac_104756	0.318371	0
HS_H3K27ac_10476	0.217602	0
HS_H3K27ac_104762	0.322404	0
HS_H3K27ac_104763	0.344852	0
HS_H3K27ac_104764	0.324435	0
HS_H3K27ac_104765	0.26738	0
HS_H3K27ac_104766	0.254386	0
HS_H3K27ac_104767	0.2904	0
HS_H3K27ac_104768	0.303239	1
HS_H3K27ac_104769	0.329905	0
HS_H3K27ac_104771	0.263581	0
HS_H3K27ac_104773	0.278177	0
HS_H3K27ac_104779	0.242833	0
HS_H3K27ac_10478	0.264591	0
HS_H3K27ac_10479	0.282975	0
HS_H3K27ac_104791	0.246377	0
HS_H3K27ac_104792	0.260927	0
HS_H3K27ac_104793	0.287815	0
HS_H3K27ac_104794	0.246403	0
HS_H3K27ac_104795	0.224811	0
HS_H3K27ac_104796	0.265876	0
HS_H3K27ac_104797	0.292533	0
HS_H3K27ac_104798	0.268999	0
HS_H3K27ac_104799	0.212276	0
HS_H3K27ac_10480	0.232076	0
HS_H3K27ac_104800	0.290749	0
HS_H3K27ac_104801	0.233255	0
HS_H3K27ac_104802	0.291857	0
HS_H3K27ac_104808	0.195341	0
HS_H3K27ac_10481	0.170086	1
HS_H3K27ac_104814	0.212711	0
HS_H3K27ac_104815	0.223758	1
HS_H3K27ac_104816	0.206642	0
HS_H3K27ac_104817	0.220639	0
HS_H3K27ac_104818	0.256757	1
HS_H3K27ac_104819	0.193074	0
HS_H3K27ac_10482	0.152439	0
HS_H3K27ac_104820	0.267831	1
HS_H3K27ac_104821	0.279603	0
HS_H3K27ac_104827	0.278027	0
HS_H3K27ac_104828	0.268275	1
HS_H3K27ac_104829	0.190536	0
HS_H3K27ac_10483	0.251562	0
HS_H3K27ac_104830	0.246964	0
HS_H3K27ac_104831	0.246619	0
HS_H3K27ac_104834	0.313846	1
HS_H3K27ac_104835	0.340936	0
HS_H3K27ac_104836	0.269271	0
HS_H3K27ac_10484	0.283798	0
HS_H3K27ac_104841	0.314413	0
HS_H3K27ac_104842	0.284682	0
HS_H3K27ac_104844	0.346778	0
HS_H3K27ac_104846	0.341924	0
HS_H3K27ac_104847	0.280298	0
HS_H3K27ac_104849	0.321991	0
HS_H3K27ac_10485	0.246871	1
HS_H3K27ac_104854	0.301762	0
HS_H3K27ac_104855	0.380926	0
HS_H3K27ac_104856	0.298984	0
HS_H3K27ac_104857	0.320736	0
HS_H3K27ac_104858	0.280686	1
HS_H3K27ac_104859	0.288136	0
HS_H3K27ac_10486	0.169948	0
HS_H3K27ac_104861	0.309689	1
HS_H3K27ac_104862	0.282991	0
HS_H3K27ac_104869	0.286214	0
HS_H3K27ac_104871	0.267813	1
HS_H3K27ac_104872	0.255132	0
HS_H3K27ac_104874	0.226329	0
HS_H3K27ac_104875	0.224473	0
HS_H3K27ac_104876	0.283003	0
HS_H3K27ac_104877	0.234043	0
HS_H3K27ac_104878	0.246535	1
HS_H3K27ac_104879	0.269488	1
HS_H3K27ac_10488	0.244094	0
HS_H3K27ac_104880	0.321623	0
HS_H3K27ac_104881	0.281411	0
HS_H3K27ac_104883	0.293142	1
HS_H3K27ac_104884	0.29653	0
HS_H3K27ac_104885	0.260377	0
HS_H3K27ac_104886	0.354506	0
HS_H3K27ac_104888	0.295426	0
HS_H3K27ac_104889	0.25712	0
HS_H3K27ac_10489	0.308852	0
HS_H3K27ac_104890	0.189435	0
HS_H3K27ac_104891	0.29359	0
HS_H3K27ac_104895	0.268427	1
HS_H3K27ac_104898	0.242001	0
HS_H3K27ac_10490	0.337338	0
HS_H3K27ac_104901	0.305556	0
HS_H3K27ac_10491	0.310249	0
HS_H3K27ac_10492	0.316032	1
HS_H3K27ac_10493	0.280178	0
HS_H3K27ac_10494	0.228809	0
HS_H3K27ac_10495	0.249752	0
HS_H3K27ac_10496	0.234357	0
HS_H3K27ac_10497	0.242853	0
HS_H3K27ac_105057	0.27297	0
HS_H3K27ac_105060	0.360454	0
HS_H3K27ac_105063	0.370279	0
HS_H3K27ac_105292	0.311615	0
HS_H3K27ac_105301	0.310345	0
HS_H3K27ac_105303	0.314345	0
HS_H3K27ac_105307	0.306787	0
HS_H3K27ac_105313	0.302898	0
HS_H3K27ac_10533	0.25566	0
HS_H3K27ac_10534	0.322388	0
HS_H3K27ac_105341	0.318558	0
HS_H3K27ac_10535	0.293858	0
HS_H3K27ac_10539	0.0849609	0
HS_H3K27ac_10540	0.232465	0
HS_H3K27ac_105405	0.285328	0
HS_H3K27ac_105409	0.273499	0
HS_H3K27ac_10541	0.284	1
HS_H3K27ac_105410	0.278716	0
HS_H3K27ac_105413	0.26587	0
HS_H3K27ac_10542	0.181818	1
HS_H3K27ac_10543	0.252826	0
HS_H3K27ac_10544	0.211382	0
HS_H3K27ac_10547	0.313012	1
HS_H3K27ac_10551	0.217085	0
HS_H3K27ac_10552	0.290218	0
HS_H3K27ac_10553	0.15102	0
HS_H3K27ac_105548	0.176301	1
HS_H3K27ac_105549	0.264039	0
HS_H3K27ac_10555	0.30504	0
HS_H3K27ac_105550	0.212824	0
HS_H3K27ac_10557	0.290719	0
HS_H3K27ac_105573	0.389066	0
HS_H3K27ac_105575	0.303583	0
HS_H3K27ac_10558	0.324324	0
HS_H3K27ac_10559	0.281395	0
HS_H3K27ac_105629	0.0482529	0
HS_H3K27ac_10567	0.264317	1
HS_H3K27ac_10568	0.23662	1
HS_H3K27ac_10569	0.26129	0
HS_H3K27ac_10570	0.25271	0
HS_H3K27ac_105700	0.295549	0
HS_H3K27ac_105702	0.236246	1
HS_H3K27ac_105703	0.281146	0
HS_H3K27ac_105704	0.222116	0
HS_H3K27ac_105705	0.233074	0
HS_H3K27ac_105706	0.21219	1
HS_H3K27ac_105707	0.30303	1
HS_H3K27ac_105708	0.294552	1
HS_H3K27ac_105709	0.290161	1
HS_H3K27ac_105710	0.277473	0
HS_H3K27ac_105712	0.237888	0
HS_H3K27ac_105713	0.256922	0
HS_H3K27ac_105717	0.266744	0
HS_H3K27ac_105718	0.312779	0
HS_H3K27ac_10572	0.279793	0
HS_H3K27ac_10573	0.230311	0
HS_H3K27ac_10575	0.244186	1
HS_H3K27ac_10579	0.265947	0
HS_H3K27ac_105798	0.263395	1
HS_H3K27ac_105801	0.255166	0
HS_H3K27ac_105802	0.25895	0
HS_H3K27ac_105804	0.213592	0
HS_H3K27ac_105812	0.272311	0
HS_H3K27ac_105813	0.243142	1
HS_H3K27ac_105819	0.271875	0
HS_H3K27ac_105820	0.247007	0
HS_H3K27ac_105821	0.309764	0
HS_H3K27ac_105822	0.204513	1
HS_H3K27ac_105823	0.255747	0
HS_H3K27ac_105827	0.244558	0
HS_H3K27ac_10583	0.295056	0
HS_H3K27ac_105840	0.217716	0
HS_H3K27ac_105851	0.247037	0
HS_H3K27ac_105852	0.304754	1
HS_H3K27ac_105853	0.245702	0
HS_H3K27ac_105854	0.38522	0
HS_H3K27ac_105855	0.353227	1
HS_H3K27ac_105856	0.287078	0
HS_H3K27ac_105859	0.30365	0
HS_H3K27ac_10586	0.313725	0
HS_H3K27ac_105860	0.2816	1
HS_H3K27ac_105866	0.270445	0
HS_H3K27ac_105868	0.309059	0
HS_H3K27ac_105869	0.241057	0
HS_H3K27ac_10587	0.320174	0
HS_H3K27ac_105870	0.250578	0
HS_H3K27ac_105872	0.237805	1
HS_H3K27ac_105873	0.293735	0
HS_H3K27ac_105874	0.331241	0
HS_H3K27ac_105875	0.252909	1
HS_H3K27ac_105876	0.260932	0
HS_H3K27ac_105877	0.323488	0
HS_H3K27ac_105880	0.273196	1
HS_H3K27ac_105881	0.272193	0
HS_H3K27ac_105883	0.311573	1
HS_H3K27ac_105884	0.280688	0
HS_H3K27ac_105887	0.271724	0
HS_H3K27ac_105888	0.258045	0
HS_H3K27ac_105891	0.273067	0
HS_H3K27ac_105893	0.249029	0
HS_H3K27ac_105894	0.308249	0
HS_H3K27ac_105895	0.283097	1
HS_H3K27ac_105896	0.308722	0
HS_H3K27ac_105897	0.289407	0
HS_H3K27ac_105900	0.246959	0
HS_H3K27ac_105908	0.216087	0
HS_H3K27ac_105909	0.264915	0
HS_H3K27ac_105911	0.320833	0
HS_H3K27ac_105912	0.298477	0
HS_H3K27ac_105914	0.283853	1
HS_H3K27ac_105915	0.279915	0
HS_H3K27ac_105917	0.264249	0
HS_H3K27ac_105925	0.334438	0
HS_H3K27ac_105928	0.266625	1
HS_H3K27ac_105929	0.312203	0
HS_H3K27ac_10593	0.315181	0
HS_H3K27ac_105930	0.219643	0
HS_H3K27ac_105931	0.243279	0
HS_H3K27ac_105933	0.334532	0
HS_H3K27ac_105934	0.323219	0
HS_H3K27ac_105935	0.232332	0
HS_H3K27ac_105938	0.361165	0
HS_H3K27ac_105939	0.298071	0
HS_H3K27ac_105940	0.331629	1
HS_H3K27ac_105941	0.233061	0
HS_H3K27ac_105942	0.309524	1
HS_H3K27ac_105943	0.235659	0
HS_H3K27ac_105944	0.314286	0
HS_H3K27ac_105945	0.374126	0
HS_H3K27ac_105946	0.261603	0
HS_H3K27ac_105947	0.271666	0
HS_H3K27ac_105948	0.267365	0
HS_H3K27ac_105949	0.241202	0
HS_H3K27ac_105950	0.292531	0
HS_H3K27ac_105951	0.220946	0
HS_H3K27ac_105953	0.297468	0
HS_H3K27ac_105957	0.18624	0
HS_H3K27ac_105958	0.27664	0
HS_H3K27ac_105959	0.218182	0
HS_H3K27ac_105964	0.299852	0
HS_H3K27ac_105968	0.344045	0
HS_H3K27ac_105972	0.250855	0
HS_H3K27ac_105977	0.131974	0
HS_H3K27ac_105981	0.193425	0
HS_H3K27ac_105989	0.318047	0
HS_H3K27ac_105991	0.216548	0
HS_H3K27ac_105992	0.20294	0
HS_H3K27ac_105993	0.307814	1
HS_H3K27ac_105994	0.250473	0
HS_H3K27ac_105995	0.236493	1
HS_H3K27ac_105996	0.220522	0
HS_H3K27ac_105999	0.25141	0
HS_H3K27ac_106000	0.242722	0
HS_H3K27ac_106002	0.242824	0
HS_H3K27ac_106003	0.307452	0
HS_H3K27ac_106005	0.279589	0
HS_H3K27ac_106006	0.259209	0
HS_H3K27ac_106008	0.254083	0
HS_H3K27ac_10602	0.23988	0
HS_H3K27ac_106022	0.218023	0
HS_H3K27ac_106029	0.233645	0
HS_H3K27ac_10603	0.269943	0
HS_H3K27ac_10604	0.239286	0
HS_H3K27ac_106047	0.194864	0
HS_H3K27ac_106048	0.324736	0
HS_H3K27ac_106049	0.377907	0
HS_H3K27ac_106050	0.313869	0
HS_H3K27ac_106055	0.382353	0
HS_H3K27ac_106056	0.248439	1
HS_H3K27ac_106057	0.318774	0
HS_H3K27ac_106058	0.265926	0
HS_H3K27ac_106059	0.262249	0
HS_H3K27ac_10606	0.331923	0
HS_H3K27ac_106060	0.266358	0
HS_H3K27ac_106061	0.25153	0
HS_H3K27ac_106062	0.249357	0
HS_H3K27ac_106063	0.322381	0
HS_H3K27ac_106064	0.319873	0
HS_H3K27ac_106065	0.286181	0
HS_H3K27ac_106066	0.296941	0
HS_H3K27ac_106067	0.299422	0
HS_H3K27ac_106068	0.255254	0
HS_H3K27ac_106070	0.107438	0
HS_H3K27ac_106071	0.280046	0
HS_H3K27ac_106072	0.246288	0
HS_H3K27ac_106074	0.269038	0
HS_H3K27ac_106075	0.229368	0
HS_H3K27ac_106076	0.211957	0
HS_H3K27ac_106077	0.348387	1
HS_H3K27ac_106078	0.359281	0
HS_H3K27ac_106079	0.252465	0
HS_H3K27ac_10608	0.336698	0
HS_H3K27ac_106080	0.249175	0
HS_H3K27ac_106082	0.29526	0
HS_H3K27ac_106084	0.278545	0
HS_H3K27ac_106085	0.265306	0
HS_H3K27ac_106086	0.305878	0
HS_H3K27ac_106088	0.244826	0
HS_H3K27ac_106089	0.358333	0
HS_H3K27ac_10609	0.251712	0
HS_H3K27ac_106090	0.285003	0
HS_H3K27ac_106099	0.195971	0
HS_H3K27ac_10610	0.335859	0
HS_H3K27ac_106101	0.309764	0
HS_H3K27ac_106102	0.232426	0
HS_H3K27ac_106103	0.254301	0
HS_H3K27ac_106104	0.259168	0
HS_H3K27ac_106105	0.262826	0
HS_H3K27ac_106106	0.291443	0
HS_H3K27ac_106111	0.316705	0
HS_H3K27ac_106112	0.22974	0
HS_H3K27ac_106113	0.226623	1
HS_H3K27ac_106114	0.21433	0
HS_H3K27ac_106118	0.348323	0
HS_H3K27ac_106119	0.271739	0
HS_H3K27ac_106120	0.186813	1
HS_H3K27ac_106121	0.277423	0
HS_H3K27ac_106122	0.239471	1
HS_H3K27ac_106123	0.243674	0
HS_H3K27ac_106127	0.325527	1
HS_H3K27ac_106129	0.235294	0
HS_H3K27ac_10613	0.30509	0
HS_H3K27ac_106134	0.235867	0
HS_H3K27ac_106137	0.256922	0
HS_H3K27ac_106138	0.191796	1
HS_H3K27ac_106142	0.268219	0
HS_H3K27ac_106143	0.306167	0
HS_H3K27ac_106153	0.249365	0
HS_H3K27ac_106156	0.188007	0
HS_H3K27ac_106157	0.380682	0
HS_H3K27ac_106158	0.322581	0
HS_H3K27ac_106159	0.26087	0
HS_H3K27ac_10616	0.3387	0
HS_H3K27ac_106160	0.283407	1
HS_H3K27ac_106161	0.284844	1
HS_H3K27ac_106162	0.342412	0
HS_H3K27ac_106164	0.228796	0
HS_H3K27ac_106166	0.304676	0
HS_H3K27ac_106167	0.316736	0
HS_H3K27ac_106168	0.278261	0
HS_H3K27ac_106186	0.224206	0
HS_H3K27ac_106189	0.219318	0
HS_H3K27ac_10619	0.297745	0
HS_H3K27ac_106190	0.250446	0
HS_H3K27ac_106202	0.345708	0
HS_H3K27ac_106203	0.239653	0
HS_H3K27ac_106204	0.259697	0
HS_H3K27ac_106206	0.255291	0
HS_H3K27ac_106207	0.222561	0
HS_H3K27ac_106209	0.323442	1
HS_H3K27ac_10621	0.262092	0
HS_H3K27ac_106210	0.263047	0
HS_H3K27ac_106214	0.266631	0
HS_H3K27ac_106217	0.290142	0
HS_H3K27ac_106218	0.272727	0
HS_H3K27ac_106219	0.234375	0
HS_H3K27ac_106220	0.286912	0
HS_H3K27ac_106221	0.285217	0
HS_H3K27ac_106225	0.310295	0
HS_H3K27ac_106231	0.273829	0
HS_H3K27ac_106232	0.237209	0
HS_H3K27ac_106233	0.235737	0
HS_H3K27ac_106234	0.263717	0
HS_H3K27ac_106236	0.252072	0
HS_H3K27ac_106237	0.2	0
HS_H3K27ac_106238	0.391892	1
HS_H3K27ac_106239	0.171843	0
HS_H3K27ac_10624	0.463099	0
HS_H3K27ac_106244	0.2661	0
HS_H3K27ac_106245	0.228413	0
HS_H3K27ac_106246	0.193007	0
HS_H3K27ac_106249	0.168416	0
HS_H3K27ac_106250	0.193346	0
HS_H3K27ac_106259	0.172713	0
HS_H3K27ac_10626	0.156186	0
HS_H3K27ac_106261	0.253453	0
HS_H3K27ac_106262	0.213088	0
HS_H3K27ac_106263	0.241058	0
HS_H3K27ac_106271	0.245614	0
HS_H3K27ac_106279	0.291277	1
HS_H3K27ac_106280	0.244976	0
[truncated: 37,516 more rows]

## Sheet: mouse_lemur
CRE	subs_per_total	conservation_status
HS_H3K27ac_10000	0.122181	0
HS_H3K27ac_10002	0.109607	1
HS_H3K27ac_10003	0.156671	0
HS_H3K27ac_10004	0.127126	0
HS_H3K27ac_10009	0.147717	0
HS_H3K27ac_10010	0.132109	1
HS_H3K27ac_10011	0.149568	1
HS_H3K27ac_10012	0.173913	0
HS_H3K27ac_10013	0.115691	0
HS_H3K27ac_10014	0.145211	0
HS_H3K27ac_10016	0.144479	0
HS_H3K27ac_10017	0.120086	1
HS_H3K27ac_10018	0.128272	1
HS_H3K27ac_10019	0.138191	0
HS_H3K27ac_10020	0.115385	0
HS_H3K27ac_10021	0.143605	0
HS_H3K27ac_10022	0.124364	1
HS_H3K27ac_10023	0.131685	1
HS_H3K27ac_100232	0.121212	0
HS_H3K27ac_100233	0.143411	0
HS_H3K27ac_10024	0.0947849	0
HS_H3K27ac_100241	0.15035	0
HS_H3K27ac_100247	0.0736607	1
HS_H3K27ac_100248	0.155678	0
HS_H3K27ac_100251	0.157895	1
HS_H3K27ac_100252	0.138686	0
HS_H3K27ac_10026	0.0987775	0
HS_H3K27ac_10027	0.0936782	0
HS_H3K27ac_100271	0.166667	0
HS_H3K27ac_10028	0.120859	0
HS_H3K27ac_10029	0.133655	0
HS_H3K27ac_10030	0.10037	0
HS_H3K27ac_10032	0.129043	0
HS_H3K27ac_10034	0.159635	0
HS_H3K27ac_100370	0.0512164	0
HS_H3K27ac_100374	0.1218	0
HS_H3K27ac_100377	0.105816	0
HS_H3K27ac_100397	0.145882	0
HS_H3K27ac_100400	0.12518	0
HS_H3K27ac_10046	0.173214	1
HS_H3K27ac_100461	0.126437	1
HS_H3K27ac_100462	0.124031	0
HS_H3K27ac_100465	0.0740741	1
HS_H3K27ac_100466	0.12069	1
HS_H3K27ac_100467	0.0888889	1
HS_H3K27ac_10053	0.160615	0
HS_H3K27ac_100549	0.0997151	0
HS_H3K27ac_100558	0.151188	0
HS_H3K27ac_10056	0.146132	0
HS_H3K27ac_100561	0.150358	0
HS_H3K27ac_100563	0.20155	1
HS_H3K27ac_100565	0.137931	0
HS_H3K27ac_100568	0.12844	1
HS_H3K27ac_100570	0.150888	0
HS_H3K27ac_10058	0.11747	0
HS_H3K27ac_10060	0.145447	0
HS_H3K27ac_10061	0.130303	0
HS_H3K27ac_10063	0.12007	1
HS_H3K27ac_10064	0.146531	0
HS_H3K27ac_10065	0.128518	0
HS_H3K27ac_10067	0.128731	1
HS_H3K27ac_100676	0.164551	1
HS_H3K27ac_100677	0.159677	1
HS_H3K27ac_100678	0.166667	1
HS_H3K27ac_10068	0.144461	0
HS_H3K27ac_100680	0.147651	1
HS_H3K27ac_100682	0.170787	0
HS_H3K27ac_10069	0.130096	0
HS_H3K27ac_100690	0.139672	0
HS_H3K27ac_100691	0.171053	1
HS_H3K27ac_100693	0.139881	0
HS_H3K27ac_100694	0.156899	0
HS_H3K27ac_100695	0.150437	0
HS_H3K27ac_100698	0.195745	0
HS_H3K27ac_10070	0.115199	0
HS_H3K27ac_100704	0.116883	0
HS_H3K27ac_100706	0.186898	1
HS_H3K27ac_100707	0.12069	1
HS_H3K27ac_100708	0.150538	1
HS_H3K27ac_100709	0.162055	1
HS_H3K27ac_100710	0.166667	1
HS_H3K27ac_100711	0.172956	0
HS_H3K27ac_100713	0.140496	0
HS_H3K27ac_100715	0.178138	0
HS_H3K27ac_100718	0.168831	0
HS_H3K27ac_100719	0.132353	0
HS_H3K27ac_10072	0.0740566	1
HS_H3K27ac_100720	0.160883	1
HS_H3K27ac_100721	0.186992	0
HS_H3K27ac_100724	0.153846	0
HS_H3K27ac_100727	0.122642	0
HS_H3K27ac_100728	0.136198	1
HS_H3K27ac_100729	0.125084	0
HS_H3K27ac_10073	0.0635593	1
HS_H3K27ac_10074	0.0968045	0
HS_H3K27ac_100741	0.10241	0
HS_H3K27ac_100744	0.150327	0
HS_H3K27ac_100745	0.185185	0
HS_H3K27ac_10075	0.138037	1
HS_H3K27ac_100750	0.18732	0
HS_H3K27ac_100755	0.180049	1
HS_H3K27ac_10076	0.13984	0
HS_H3K27ac_100761	0.155914	1
HS_H3K27ac_100778	0.107664	0
HS_H3K27ac_100779	0.165775	0
HS_H3K27ac_100780	0.178068	1
HS_H3K27ac_100781	0.145161	1
HS_H3K27ac_100782	0.115044	1
HS_H3K27ac_100783	0.10582	0
HS_H3K27ac_10079	0.108242	0
HS_H3K27ac_1008	0.132597	0
HS_H3K27ac_10080	0.113422	0
HS_H3K27ac_100803	0.141185	0
HS_H3K27ac_100804	0.155666	0
HS_H3K27ac_10081	0.0977608	1
HS_H3K27ac_100812	0.140196	0
HS_H3K27ac_100813	0.175451	1
HS_H3K27ac_10082	0.129282	0
HS_H3K27ac_100820	0.130435	1
HS_H3K27ac_100821	0.148296	1
HS_H3K27ac_100822	0.12782	0
HS_H3K27ac_100823	0.120904	0
HS_H3K27ac_100824	0.071179	0
HS_H3K27ac_100825	0.098708	0
HS_H3K27ac_100826	0.132948	0
HS_H3K27ac_100828	0.156593	0
HS_H3K27ac_100829	0.122071	0
HS_H3K27ac_100831	0.139499	0
HS_H3K27ac_100835	0.118519	0
HS_H3K27ac_100836	0.157823	0
HS_H3K27ac_100837	0.11413	1
HS_H3K27ac_100838	0.166667	0
HS_H3K27ac_100839	0.152357	0
HS_H3K27ac_100842	0.131403	1
HS_H3K27ac_100843	0.155378	1
HS_H3K27ac_10085	0.13	0
HS_H3K27ac_10086	0.124084	0
HS_H3K27ac_100862	0.168563	0
HS_H3K27ac_100863	0.153946	1
HS_H3K27ac_100864	0.145305	0
HS_H3K27ac_100868	0.165414	0
HS_H3K27ac_100869	0.160986	0
HS_H3K27ac_10087	0.112726	0
HS_H3K27ac_100870	0.14473	0
HS_H3K27ac_100871	0.107496	0
HS_H3K27ac_100873	0.0806045	1
HS_H3K27ac_100874	0.134342	1
HS_H3K27ac_100875	0.141833	0
HS_H3K27ac_100876	0	1
HS_H3K27ac_100896	0.0920245	0
HS_H3K27ac_10090	0.104348	1
HS_H3K27ac_100904	0.199005	0
HS_H3K27ac_10091	0.137475	0
HS_H3K27ac_100914	0.193878	0
HS_H3K27ac_100916	0.151335	1
HS_H3K27ac_100917	0.184426	0
HS_H3K27ac_10092	0.1413	0
HS_H3K27ac_100926	0.154983	0
HS_H3K27ac_100927	0.117761	0
HS_H3K27ac_100929	0.170316	1
HS_H3K27ac_100930	0.185039	0
HS_H3K27ac_100935	0.153215	0
HS_H3K27ac_100937	0.153974	0
HS_H3K27ac_100938	0.182131	0
HS_H3K27ac_10094	0.13185	0
HS_H3K27ac_100940	0.187386	1
HS_H3K27ac_100941	0.159171	0
HS_H3K27ac_100944	0.167719	0
HS_H3K27ac_100946	0.13482	0
HS_H3K27ac_100947	0.158955	1
HS_H3K27ac_100948	0.137574	0
HS_H3K27ac_100951	0.168044	1
HS_H3K27ac_100952	0.157629	0
HS_H3K27ac_100953	0.132616	0
HS_H3K27ac_100954	0.149675	0
HS_H3K27ac_100955	0.169323	1
HS_H3K27ac_100956	0.179302	0
HS_H3K27ac_100957	0.14876	1
HS_H3K27ac_100958	0.131579	0
HS_H3K27ac_100960	0.148278	0
HS_H3K27ac_100962	0.141197	0
HS_H3K27ac_100963	0.179217	1
HS_H3K27ac_100964	0.165252	0
HS_H3K27ac_100968	0.16179	0
HS_H3K27ac_100970	0.148597	0
HS_H3K27ac_100972	0.158033	0
HS_H3K27ac_100981	0.181756	0
HS_H3K27ac_100985	0.0625	0
HS_H3K27ac_100986	0.153153	0
HS_H3K27ac_100989	0.170849	1
HS_H3K27ac_100990	0.18128	1
HS_H3K27ac_100992	0.17774	0
HS_H3K27ac_100994	0.174346	1
HS_H3K27ac_100996	0.166667	1
HS_H3K27ac_100998	0.124355	0
HS_H3K27ac_10100	0.141297	0
HS_H3K27ac_101007	0.199074	1
HS_H3K27ac_101008	0.143302	0
HS_H3K27ac_10101	0.158236	1
HS_H3K27ac_101010	0.168838	1
HS_H3K27ac_101011	0.179045	0
HS_H3K27ac_101013	0.115727	0
HS_H3K27ac_10102	0.183206	1
HS_H3K27ac_101021	0.146798	0
HS_H3K27ac_101022	0.154956	0
HS_H3K27ac_101023	0.153253	0
HS_H3K27ac_101024	0.170972	1
HS_H3K27ac_101025	0.148634	1
HS_H3K27ac_101026	0.159524	0
HS_H3K27ac_10103	0.165152	0
HS_H3K27ac_101033	0.1344	0
HS_H3K27ac_101035	0.172414	0
HS_H3K27ac_101037	0.163854	0
HS_H3K27ac_101039	0.150421	0
HS_H3K27ac_10104	0.142217	0
HS_H3K27ac_101040	0.168501	0
HS_H3K27ac_101041	0.140506	1
HS_H3K27ac_10106	0.115385	1
HS_H3K27ac_101060	0.154906	0
HS_H3K27ac_10107	0.105455	1
HS_H3K27ac_10108	0.11793	0
HS_H3K27ac_101084	0.149584	0
HS_H3K27ac_101085	0.191149	0
HS_H3K27ac_101086	0.136638	0
HS_H3K27ac_101088	0.14231	0
HS_H3K27ac_101089	0.153082	0
HS_H3K27ac_101091	0.183537	0
HS_H3K27ac_101092	0.148829	0
HS_H3K27ac_101093	0.135755	0
HS_H3K27ac_101094	0.12528	0
HS_H3K27ac_101096	0.147849	1
HS_H3K27ac_101097	0.153477	0
HS_H3K27ac_101098	0.112426	1
HS_H3K27ac_101111	0.148061	1
HS_H3K27ac_101112	0.143729	0
HS_H3K27ac_101113	0.162151	0
HS_H3K27ac_101114	0.17335	0
HS_H3K27ac_101115	0.180401	1
HS_H3K27ac_101116	0.157394	0
HS_H3K27ac_101117	0.123139	1
HS_H3K27ac_101118	0.133574	1
HS_H3K27ac_101119	0.124528	0
HS_H3K27ac_101122	0.156695	0
HS_H3K27ac_101182	0.125232	0
HS_H3K27ac_101237	0.180212	1
HS_H3K27ac_101240	0.156379	0
HS_H3K27ac_101244	0.123762	0
HS_H3K27ac_101247	0.134247	0
HS_H3K27ac_101249	0.158351	0
HS_H3K27ac_101252	0.196133	0
HS_H3K27ac_101260	0.122449	1
HS_H3K27ac_101261	0.158354	0
HS_H3K27ac_101263	0.147399	0
HS_H3K27ac_101267	0.176056	0
HS_H3K27ac_101270	0.191257	0
HS_H3K27ac_101272	0.185567	1
HS_H3K27ac_101273	0.139896	0
HS_H3K27ac_101274	0.176829	0
HS_H3K27ac_101275	0.149718	0
HS_H3K27ac_101279	0.182189	0
HS_H3K27ac_101281	0.158108	0
HS_H3K27ac_101285	0.173047	0
HS_H3K27ac_10130	0.181424	0
HS_H3K27ac_101337	0.148364	0
HS_H3K27ac_101339	0.0588235	0
HS_H3K27ac_10134	0.131579	1
HS_H3K27ac_101341	0.13466	0
HS_H3K27ac_101342	0.161917	0
HS_H3K27ac_101347	0.180119	1
HS_H3K27ac_101348	0.174644	0
HS_H3K27ac_101349	0.163158	0
HS_H3K27ac_10135	0.174589	0
HS_H3K27ac_101350	0.128205	1
HS_H3K27ac_101351	0.148944	0
HS_H3K27ac_101357	0.152399	0
HS_H3K27ac_101359	0.186944	0
HS_H3K27ac_101360	0.175503	0
HS_H3K27ac_101365	0.127566	0
HS_H3K27ac_101367	0.1644	0
HS_H3K27ac_101368	0.163569	1
HS_H3K27ac_101369	0.167901	0
HS_H3K27ac_101370	0.135642	0
HS_H3K27ac_101372	0.164274	0
HS_H3K27ac_101374	0.160763	0
HS_H3K27ac_101376	0.162207	1
HS_H3K27ac_101377	0.168539	0
HS_H3K27ac_10138	0.146619	1
HS_H3K27ac_101382	0.15	0
HS_H3K27ac_101385	0.151071	0
HS_H3K27ac_10139	0.154291	1
HS_H3K27ac_10140	0.181632	0
HS_H3K27ac_10142	0.159786	1
HS_H3K27ac_101422	0.161043	1
HS_H3K27ac_101423	0.16747	0
HS_H3K27ac_101427	0.166667	0
HS_H3K27ac_101432	0.177583	0
HS_H3K27ac_101434	0.156293	0
HS_H3K27ac_101436	0.136752	0
HS_H3K27ac_101439	0.119377	0
HS_H3K27ac_101442	0.157706	0
HS_H3K27ac_101465	0.184739	0
HS_H3K27ac_101466	0.161509	1
HS_H3K27ac_101467	0.144828	0
HS_H3K27ac_10147	0.194625	0
HS_H3K27ac_101473	0.174603	0
HS_H3K27ac_101474	0.167439	1
HS_H3K27ac_101475	0.13807	0
HS_H3K27ac_10149	0.166731	0
HS_H3K27ac_101493	0.14382	0
HS_H3K27ac_101496	0.176638	0
HS_H3K27ac_101497	0.176982	0
HS_H3K27ac_101499	0.134615	0
HS_H3K27ac_101500	0.166172	1
HS_H3K27ac_10151	0.191648	1
HS_H3K27ac_101519	0.123596	0
HS_H3K27ac_10152	0.150248	1
HS_H3K27ac_10153	0.127918	0
HS_H3K27ac_10156	0.155138	0
HS_H3K27ac_10157	0.155172	0
HS_H3K27ac_10158	0.168831	0
HS_H3K27ac_1016	0.143262	0
HS_H3K27ac_101616	0.161017	1
HS_H3K27ac_101617	0.2	1
HS_H3K27ac_101618	0.159794	0
HS_H3K27ac_10163	0.156873	0
HS_H3K27ac_10164	0.185474	1
HS_H3K27ac_10165	0.198089	0
HS_H3K27ac_10167	0.179412	0
HS_H3K27ac_10168	0.159624	0
HS_H3K27ac_10169	0.144201	0
HS_H3K27ac_10171	0.150223	0
HS_H3K27ac_101713	0.125	0
HS_H3K27ac_101715	0.17562	0
HS_H3K27ac_101725	0.15038	0
HS_H3K27ac_101726	0.181687	1
HS_H3K27ac_101727	0.165305	0
HS_H3K27ac_101729	0.16881	0
HS_H3K27ac_101730	0.183544	0
HS_H3K27ac_101731	0.153153	0
HS_H3K27ac_101732	0.170762	0
HS_H3K27ac_101733	0.167633	0
HS_H3K27ac_101735	0.0540541	1
HS_H3K27ac_101736	0.155138	0
HS_H3K27ac_101737	0.0588235	1
HS_H3K27ac_10174	0.168056	0
HS_H3K27ac_101742	0.165279	0
HS_H3K27ac_101743	0.123288	1
HS_H3K27ac_101744	0.180681	1
HS_H3K27ac_101745	0.125275	1
HS_H3K27ac_101746	0.162805	1
HS_H3K27ac_101747	0.166968	0
HS_H3K27ac_101748	0.134459	0
HS_H3K27ac_101749	0.152676	0
HS_H3K27ac_101750	0.169381	0
HS_H3K27ac_101753	0.12973	0
HS_H3K27ac_101757	0.102564	0
HS_H3K27ac_101758	0.122568	0
HS_H3K27ac_101759	0.10925	0
HS_H3K27ac_101760	0.165138	0
HS_H3K27ac_101761	0.165089	0
HS_H3K27ac_101762	0.178862	0
HS_H3K27ac_101763	0.179144	0
HS_H3K27ac_101764	0.151515	0
HS_H3K27ac_101768	0.178971	0
HS_H3K27ac_101769	0.167125	1
HS_H3K27ac_10177	0.177952	0
HS_H3K27ac_101770	0.148521	0
HS_H3K27ac_101782	0.147541	0
HS_H3K27ac_101783	0.174176	0
HS_H3K27ac_101785	0.145863	0
HS_H3K27ac_101787	0.15913	1
HS_H3K27ac_101791	0.144262	0
HS_H3K27ac_101792	0.145889	0
HS_H3K27ac_101793	0.127234	0
HS_H3K27ac_101794	0.189796	0
HS_H3K27ac_101796	0.159574	1
HS_H3K27ac_101797	0.134921	0
HS_H3K27ac_101798	0.155496	0
HS_H3K27ac_101799	0.115991	1
HS_H3K27ac_101800	0.158088	0
HS_H3K27ac_101804	0.150668	0
HS_H3K27ac_101805	0.163934	0
HS_H3K27ac_101806	0.165272	0
HS_H3K27ac_101810	0.151026	0
HS_H3K27ac_101811	0.163743	0
HS_H3K27ac_101817	0.149474	1
HS_H3K27ac_101818	0.147755	0
HS_H3K27ac_101819	0.177951	0
HS_H3K27ac_101822	0.0877193	1
HS_H3K27ac_101823	0.109285	1
HS_H3K27ac_101824	0.140496	0
HS_H3K27ac_101835	0.131078	1
HS_H3K27ac_101836	0.153595	0
HS_H3K27ac_101837	0.127831	1
HS_H3K27ac_101838	0.167056	0
HS_H3K27ac_101848	0.112815	0
HS_H3K27ac_101849	0.136431	1
HS_H3K27ac_101850	0.138889	1
HS_H3K27ac_101853	0.156352	1
HS_H3K27ac_101854	0.138122	0
HS_H3K27ac_101856	0.18003	0
HS_H3K27ac_101858	0.144895	0
HS_H3K27ac_101859	0.0996542	0
HS_H3K27ac_101864	0.142899	0
HS_H3K27ac_101866	0.14192	0
HS_H3K27ac_101867	0.100877	0
HS_H3K27ac_101872	0.0954523	1
HS_H3K27ac_101873	0.169395	0
HS_H3K27ac_101875	0.156106	0
HS_H3K27ac_101876	0.15959	0
HS_H3K27ac_101877	0.119042	0
HS_H3K27ac_101878	0.143994	0
HS_H3K27ac_101880	0.122127	1
HS_H3K27ac_101881	0.184795	1
HS_H3K27ac_101882	0.0910017	0
HS_H3K27ac_101883	0.165499	1
HS_H3K27ac_101884	0.117811	0
HS_H3K27ac_101888	0.123461	0
HS_H3K27ac_101889	0.136612	1
HS_H3K27ac_101890	0.198582	1
HS_H3K27ac_101891	0.155452	0
HS_H3K27ac_101892	0.146001	1
HS_H3K27ac_101893	0.15676	0
HS_H3K27ac_101897	0.096463	0
HS_H3K27ac_101901	0.177419	0
HS_H3K27ac_101909	0.174502	0
HS_H3K27ac_10191	0.152564	0
HS_H3K27ac_101911	0.166667	0
HS_H3K27ac_101913	0.175637	0
HS_H3K27ac_101914	0.14205	0
HS_H3K27ac_101915	0.169689	0
HS_H3K27ac_101916	0.116536	1
HS_H3K27ac_101919	0.17004	0
HS_H3K27ac_101922	0.150655	1
HS_H3K27ac_101923	0.175992	0
HS_H3K27ac_101924	0.167619	0
HS_H3K27ac_101926	0.157526	0
HS_H3K27ac_101929	0.179868	1
HS_H3K27ac_101932	0.181685	0
HS_H3K27ac_101933	0.163704	0
HS_H3K27ac_101934	0.174251	0
HS_H3K27ac_101935	0.184584	0
HS_H3K27ac_101936	0.179914	0
HS_H3K27ac_101937	0.148021	1
HS_H3K27ac_101939	0.119334	0
HS_H3K27ac_10194	0.148792	0
HS_H3K27ac_101940	0.178822	0
HS_H3K27ac_101945	0.157682	0
HS_H3K27ac_101947	0.174296	0
HS_H3K27ac_101948	0.171779	1
HS_H3K27ac_101949	0.179424	0
HS_H3K27ac_10196	0.176618	0
HS_H3K27ac_101962	0.141427	1
HS_H3K27ac_101963	0.153968	0
HS_H3K27ac_10197	0.166172	0
HS_H3K27ac_101976	0.133682	0
HS_H3K27ac_101977	0.13482	0
HS_H3K27ac_10198	0.188738	0
HS_H3K27ac_10199	0.15016	0
HS_H3K27ac_102000	0.155738	0
HS_H3K27ac_102001	0.130435	0
HS_H3K27ac_102004	0.100358	0
HS_H3K27ac_10201	0.184348	0
HS_H3K27ac_102012	0.176966	0
HS_H3K27ac_102013	0.122567	1
HS_H3K27ac_102014	0.153677	1
HS_H3K27ac_102015	0.149859	0
HS_H3K27ac_102016	0.138973	0
HS_H3K27ac_102019	0.136249	1
HS_H3K27ac_102027	0.101128	0
HS_H3K27ac_102028	0.13572	0
HS_H3K27ac_102035	0.15611	0
HS_H3K27ac_102036	0.134146	1
HS_H3K27ac_102038	0.134472	0
HS_H3K27ac_102039	0.158224	0
HS_H3K27ac_102041	0.144692	0
HS_H3K27ac_102042	0.161392	0
HS_H3K27ac_102043	0.178506	0
HS_H3K27ac_102044	0.175071	1
HS_H3K27ac_102045	0.181425	0
HS_H3K27ac_102046	0.188896	0
HS_H3K27ac_102047	0.143119	0
HS_H3K27ac_102048	0.161804	0
HS_H3K27ac_102049	0.182298	1
HS_H3K27ac_10206	0.0474508	1
HS_H3K27ac_102063	0.193353	0
HS_H3K27ac_10207	0.13807	0
HS_H3K27ac_102071	0.170286	0
HS_H3K27ac_102072	0.170556	0
HS_H3K27ac_102073	0.173962	1
HS_H3K27ac_102074	0.179104	0
HS_H3K27ac_102075	0.139925	0
HS_H3K27ac_102076	0.146049	0
HS_H3K27ac_102077	0.141011	1
HS_H3K27ac_102078	0.138815	0
HS_H3K27ac_10208	0.110727	0
HS_H3K27ac_102080	0.0994764	0
HS_H3K27ac_102081	0.13942	1
HS_H3K27ac_102082	0.160156	1
HS_H3K27ac_102083	0.157048	0
HS_H3K27ac_102084	0.136185	1
HS_H3K27ac_102085	0.131916	0
HS_H3K27ac_102087	0.162033	0
HS_H3K27ac_102089	0.181818	0
HS_H3K27ac_10209	0.144058	0
HS_H3K27ac_102099	0.124105	0
HS_H3K27ac_102104	0.147412	0
HS_H3K27ac_102108	0.165333	0
HS_H3K27ac_10211	0.108674	1
HS_H3K27ac_102115	0.172566	0
HS_H3K27ac_102118	0.171176	0
HS_H3K27ac_102119	0.150157	0
HS_H3K27ac_10212	0.103395	1
HS_H3K27ac_102122	0.159659	0
HS_H3K27ac_102123	0.165164	0
HS_H3K27ac_102126	0.168246	0
HS_H3K27ac_102127	0.13832	0
HS_H3K27ac_102128	0.144193	0
HS_H3K27ac_10213	0.17616	0
HS_H3K27ac_102132	0.0982456	1
HS_H3K27ac_102133	0.149439	0
HS_H3K27ac_102135	0.14	0
HS_H3K27ac_102136	0.152669	0
HS_H3K27ac_10214	0.163117	1
HS_H3K27ac_102141	0.192829	0
HS_H3K27ac_102142	0.18705	1
HS_H3K27ac_102143	0.169329	0
HS_H3K27ac_102144	0.166667	0
HS_H3K27ac_102145	0.154303	0
HS_H3K27ac_10215	0.150754	1
HS_H3K27ac_102159	0.146542	0
HS_H3K27ac_10216	0.108752	0
HS_H3K27ac_102160	0.154477	1
HS_H3K27ac_102161	0.143849	0
HS_H3K27ac_102164	0.119607	0
HS_H3K27ac_102166	0.17952	0
HS_H3K27ac_102168	0.165314	0
HS_H3K27ac_102169	0.167353	1
HS_H3K27ac_10217	0.146795	0
HS_H3K27ac_102170	0.163349	0
HS_H3K27ac_102171	0.145585	0
HS_H3K27ac_102172	0.174083	0
HS_H3K27ac_102174	0.157366	1
HS_H3K27ac_102175	0.142516	0
HS_H3K27ac_102176	0.175791	1
HS_H3K27ac_102177	0.161483	1
HS_H3K27ac_10218	0.133052	0
HS_H3K27ac_102187	0.148774	1
HS_H3K27ac_102189	0.154167	0
HS_H3K27ac_10219	0.153709	1
HS_H3K27ac_102190	0.153919	1
HS_H3K27ac_102191	0.151838	0
HS_H3K27ac_102192	0.162726	0
HS_H3K27ac_102194	0.157791	0
HS_H3K27ac_102195	0.169365	0
HS_H3K27ac_102197	0.146335	0
HS_H3K27ac_10220	0.143714	0
HS_H3K27ac_102200	0.13753	0
HS_H3K27ac_102205	0.139248	0
HS_H3K27ac_102207	0.152888	0
HS_H3K27ac_102208	0.148625	0
HS_H3K27ac_102209	0.142473	0
HS_H3K27ac_102214	0.152373	1
HS_H3K27ac_102215	0.159574	0
HS_H3K27ac_102217	0.160055	0
HS_H3K27ac_102219	0.179416	0
HS_H3K27ac_102221	0.187755	0
HS_H3K27ac_102227	0.127371	1
HS_H3K27ac_102228	0	1
HS_H3K27ac_102229	0.162819	1
HS_H3K27ac_102230	0.150063	0
HS_H3K27ac_102231	0.17094	0
HS_H3K27ac_102235	0.146567	1
HS_H3K27ac_10224	0.155894	0
HS_H3K27ac_10225	0.174576	0
HS_H3K27ac_102252	0.12464	0
HS_H3K27ac_10226	0.146617	0
HS_H3K27ac_10227	0.162528	1
HS_H3K27ac_102276	0.166362	1
HS_H3K27ac_10228	0.132353	1
HS_H3K27ac_102287	0.161323	1
HS_H3K27ac_102288	0.154292	0
HS_H3K27ac_102289	0.171688	0
HS_H3K27ac_10229	0.149163	0
HS_H3K27ac_102291	0.161812	0
HS_H3K27ac_102292	0.16947	1
HS_H3K27ac_102293	0.158479	0
HS_H3K27ac_102295	0.166952	0
HS_H3K27ac_102299	0.157565	1
HS_H3K27ac_10230	0.159825	0
HS_H3K27ac_102300	0.162886	0
HS_H3K27ac_102304	0.136667	0
HS_H3K27ac_102305	0.15534	0
HS_H3K27ac_102306	0.163483	1
HS_H3K27ac_102307	0.164179	0
HS_H3K27ac_102309	0.165171	0
HS_H3K27ac_10231	0.168933	1
HS_H3K27ac_102310	0.158481	1
HS_H3K27ac_102311	0.15142	0
HS_H3K27ac_102312	0.149254	0
HS_H3K27ac_10232	0.197201	0
HS_H3K27ac_102340	0.175412	1
HS_H3K27ac_102341	0.160991	1
HS_H3K27ac_102342	0.169846	0
HS_H3K27ac_102364	0.171875	0
HS_H3K27ac_102365	0.180205	0
HS_H3K27ac_102382	0.109987	0
HS_H3K27ac_102384	0.158915	0
HS_H3K27ac_102385	0.177419	1
HS_H3K27ac_102386	0.143631	0
HS_H3K27ac_102387	0.172876	0
HS_H3K27ac_102391	0.174757	1
HS_H3K27ac_102392	0.133427	0
HS_H3K27ac_102393	0.182219	0
HS_H3K27ac_102398	0.0888803	0
HS_H3K27ac_102408	0.125604	0
HS_H3K27ac_102417	0.172596	0
HS_H3K27ac_102418	0.119347	0
HS_H3K27ac_102420	0.151605	0
HS_H3K27ac_102422	0.155914	0
HS_H3K27ac_102427	0.144199	0
HS_H3K27ac_102431	0.191781	0
HS_H3K27ac_102432	0.144054	1
HS_H3K27ac_102435	0.159744	0
HS_H3K27ac_102436	0.135638	0
HS_H3K27ac_102437	0.142857	1
HS_H3K27ac_102462	0.175727	1
HS_H3K27ac_102468	0.145012	1
HS_H3K27ac_102469	0.147017	0
HS_H3K27ac_102470	0.168142	1
HS_H3K27ac_102471	0.154651	1
HS_H3K27ac_102473	0.177974	0
HS_H3K27ac_102476	0.114983	0
HS_H3K27ac_102478	0.163116	0
HS_H3K27ac_10248	0.193767	1
HS_H3K27ac_102488	0.155935	0
HS_H3K27ac_102489	0.137387	1
HS_H3K27ac_10249	0.178304	1
HS_H3K27ac_102490	0.161479	0
HS_H3K27ac_102491	0.149495	0
HS_H3K27ac_102492	0.162449	0
HS_H3K27ac_102493	0.131183	0
HS_H3K27ac_102495	0.174388	0
HS_H3K27ac_102497	0.159447	0
HS_H3K27ac_102499	0.150418	0
HS_H3K27ac_102500	0.154255	1
HS_H3K27ac_102501	0.161209	0
HS_H3K27ac_102502	0.180328	1
HS_H3K27ac_102503	0.106583	0
HS_H3K27ac_102506	0.137523	0
HS_H3K27ac_102508	0.173008	0
HS_H3K27ac_102509	0.149652	0
HS_H3K27ac_102511	0.17381	0
HS_H3K27ac_102514	0.166492	0
HS_H3K27ac_102516	0.134259	0
HS_H3K27ac_102518	0.17934	0
HS_H3K27ac_102519	0.17898	0
HS_H3K27ac_102521	0.188824	1
HS_H3K27ac_102522	0.147803	1
HS_H3K27ac_102523	0.195276	0
HS_H3K27ac_102525	0.160772	0
HS_H3K27ac_102527	0.174147	0
HS_H3K27ac_102528	0.150823	0
HS_H3K27ac_102529	0.165925	0
HS_H3K27ac_102531	0.145255	0
HS_H3K27ac_102532	0.152764	0
HS_H3K27ac_102544	0.146568	1
HS_H3K27ac_102545	0.176497	0
HS_H3K27ac_102546	0.183884	0
HS_H3K27ac_102550	0.18859	0
HS_H3K27ac_102551	0.170862	0
HS_H3K27ac_102552	0.173158	1
HS_H3K27ac_102553	0.185544	0
HS_H3K27ac_102554	0.173703	0
HS_H3K27ac_102556	0.143447	0
HS_H3K27ac_102557	0.150995	0
HS_H3K27ac_102558	0.157914	0
HS_H3K27ac_102560	0.160101	0
HS_H3K27ac_102562	0.168374	0
HS_H3K27ac_102564	0.147887	0
HS_H3K27ac_10257	0.178872	0
HS_H3K27ac_102572	0.162393	0
HS_H3K27ac_102575	0.149793	0
HS_H3K27ac_102577	0.173688	0
HS_H3K27ac_10258	0.151709	0
HS_H3K27ac_102581	0.161194	0
HS_H3K27ac_102582	0.141667	1
HS_H3K27ac_102583	0.170234	0
HS_H3K27ac_102585	0.151332	0
HS_H3K27ac_102588	0.182131	1
HS_H3K27ac_102589	0.154195	0
HS_H3K27ac_10259	0.162197	0
HS_H3K27ac_102593	0.17669	0
HS_H3K27ac_102597	0.162772	0
HS_H3K27ac_1026	0.124864	0
HS_H3K27ac_102600	0.152672	0
HS_H3K27ac_102602	0.127877	1
HS_H3K27ac_102603	0.20339	0
HS_H3K27ac_102604	0.189934	0
HS_H3K27ac_10261	0.124617	0
HS_H3K27ac_102612	0.127318	0
HS_H3K27ac_102615	0.125333	0
HS_H3K27ac_102616	0.161892	0
HS_H3K27ac_10262	0.156627	0
HS_H3K27ac_102623	0.151575	0
HS_H3K27ac_102629	0.157134	0
HS_H3K27ac_10263	0.129545	0
HS_H3K27ac_102632	0.121475	0
HS_H3K27ac_102634	0.1498	0
HS_H3K27ac_102635	0.168508	0
HS_H3K27ac_102638	0.155835	1
HS_H3K27ac_102639	0.188936	1
HS_H3K27ac_10264	0.146552	0
HS_H3K27ac_102640	0.16129	1
HS_H3K27ac_102647	0.140025	0
HS_H3K27ac_10266	0.184028	0
HS_H3K27ac_102662	0.150943	0
HS_H3K27ac_10267	0.159222	1
HS_H3K27ac_10268	0.150832	1
HS_H3K27ac_10269	0.140358	1
HS_H3K27ac_102691	0.134884	1
HS_H3K27ac_102692	0.159364	0
HS_H3K27ac_102696	0.149153	0
HS_H3K27ac_10270	0.154878	0
HS_H3K27ac_102701	0.150523	0
HS_H3K27ac_102706	0.143797	0
HS_H3K27ac_10271	0.176827	0
HS_H3K27ac_102714	0.133089	0
HS_H3K27ac_102717	0.170073	0
HS_H3K27ac_102718	0.171827	0
HS_H3K27ac_102728	0.120867	0
HS_H3K27ac_102730	0.155772	0
HS_H3K27ac_102731	0.165972	0
HS_H3K27ac_102732	0.130324	0
HS_H3K27ac_10274	0.171008	0
HS_H3K27ac_102746	0.128395	1
HS_H3K27ac_102747	0.144869	0
HS_H3K27ac_102758	0.125265	0
HS_H3K27ac_102760	0.156802	0
HS_H3K27ac_102762	0.118138	0
HS_H3K27ac_102763	0.121317	1
HS_H3K27ac_102764	0.172241	0
HS_H3K27ac_102766	0.0963239	0
HS_H3K27ac_102770	0.124146	0
HS_H3K27ac_102772	0.148997	0
HS_H3K27ac_102775	0.160853	1
HS_H3K27ac_102785	0.145295	0
HS_H3K27ac_10280	0.123457	1
HS_H3K27ac_102802	0.128781	0
HS_H3K27ac_10281	0.125234	0
HS_H3K27ac_102817	0.15614	1
HS_H3K27ac_102818	0.150888	0
HS_H3K27ac_102819	0.168794	0
HS_H3K27ac_10282	0.0517661	0
HS_H3K27ac_10283	0.0559809	1
HS_H3K27ac_102836	0.13789	0
HS_H3K27ac_102837	0.162896	0
HS_H3K27ac_102838	0.13662	0
HS_H3K27ac_102839	0.143856	0
HS_H3K27ac_10284	0.162985	0
HS_H3K27ac_102840	0.179514	0
HS_H3K27ac_102842	0.15935	1
HS_H3K27ac_102843	0.128108	0
HS_H3K27ac_102854	0.13975	0
HS_H3K27ac_102860	0.134878	0
HS_H3K27ac_102862	0.140321	0
HS_H3K27ac_10287	0.182653	0
HS_H3K27ac_102872	0.116641	0
HS_H3K27ac_102875	0.151047	0
HS_H3K27ac_102882	0.168934	1
HS_H3K27ac_102883	0.160506	0
HS_H3K27ac_102884	0.159685	0
HS_H3K27ac_102886	0.14205	0
HS_H3K27ac_10289	0.177254	0
HS_H3K27ac_102905	0.151038	0
HS_H3K27ac_10291	0.179416	0
HS_H3K27ac_102910	0.116279	0
HS_H3K27ac_102911	0.132812	0
HS_H3K27ac_102913	0.125704	0
HS_H3K27ac_102914	0.123711	1
HS_H3K27ac_102917	0.157303	0
HS_H3K27ac_102919	0.101835	0
HS_H3K27ac_10292	0.160817	0
HS_H3K27ac_102920	0.16693	0
HS_H3K27ac_102925	0.135757	0
HS_H3K27ac_102926	0.14898	0
HS_H3K27ac_102929	0.135535	1
HS_H3K27ac_10293	0.156182	0
HS_H3K27ac_102930	0.145375	0
HS_H3K27ac_102933	0.131148	1
HS_H3K27ac_102934	0.10765	0
HS_H3K27ac_102937	0.139666	0
HS_H3K27ac_102939	0.104568	0
HS_H3K27ac_10294	0.183078	0
HS_H3K27ac_102940	0.101421	0
HS_H3K27ac_102944	0.109883	0
HS_H3K27ac_102945	0.162548	0
HS_H3K27ac_102947	0.0985091	0
HS_H3K27ac_102949	0.105387	0
HS_H3K27ac_102951	0.114659	0
HS_H3K27ac_102954	0.119265	0
HS_H3K27ac_102958	0.134418	0
HS_H3K27ac_102963	0.121166	0
HS_H3K27ac_102965	0.16807	0
HS_H3K27ac_102966	0.133586	0
HS_H3K27ac_102969	0.163166	0
HS_H3K27ac_102971	0.137823	0
HS_H3K27ac_102973	0.126785	1
HS_H3K27ac_102974	0.140334	0
HS_H3K27ac_10299	0.1265	0
HS_H3K27ac_103012	0.164414	0
HS_H3K27ac_103013	0.177358	1
HS_H3K27ac_103014	0.13496	0
HS_H3K27ac_103016	0.167296	1
HS_H3K27ac_103017	0.118631	0
HS_H3K27ac_103023	0.118426	0
HS_H3K27ac_103034	0.140781	0
HS_H3K27ac_103044	0.14039	0
HS_H3K27ac_103051	0.124474	0
HS_H3K27ac_103055	0.120134	0
HS_H3K27ac_103057	0.154731	0
HS_H3K27ac_103058	0.160914	0
HS_H3K27ac_103059	0.161722	0
HS_H3K27ac_103060	0.142786	0
HS_H3K27ac_103067	0.157321	0
HS_H3K27ac_103068	0.144376	1
HS_H3K27ac_103069	0.0969968	0
HS_H3K27ac_10307	0.179699	0
HS_H3K27ac_103070	0.111248	0
HS_H3K27ac_103071	0.169077	0
HS_H3K27ac_103072	0.127765	1
HS_H3K27ac_103073	0.136728	0
HS_H3K27ac_103076	0.136669	0
HS_H3K27ac_103077	0.144866	0
HS_H3K27ac_103078	0.11246	1
HS_H3K27ac_103079	0.149749	0
HS_H3K27ac_10308	0.161252	0
HS_H3K27ac_103081	0.141472	0
HS_H3K27ac_103084	0.166169	0
HS_H3K27ac_103085	0.12795	0
HS_H3K27ac_10310	0.176076	1
HS_H3K27ac_10311	0.169478	0
HS_H3K27ac_103116	0.131218	0
HS_H3K27ac_10312	0.158898	0
HS_H3K27ac_103122	0.163097	0
HS_H3K27ac_103123	0.18019	1
HS_H3K27ac_103130	0.155191	0
HS_H3K27ac_103131	0.142434	0
HS_H3K27ac_103134	0.141502	0
HS_H3K27ac_103138	0.136777	0
HS_H3K27ac_10314	0.158347	0
HS_H3K27ac_103147	0.15162	0
HS_H3K27ac_103148	0.1328	0
HS_H3K27ac_103153	0.132812	0
HS_H3K27ac_103155	0.146887	1
HS_H3K27ac_103156	0.151251	0
HS_H3K27ac_103159	0.147157	1
HS_H3K27ac_10316	0.140279	0
HS_H3K27ac_103160	0.123478	0
HS_H3K27ac_103161	0.127149	0
HS_H3K27ac_103162	0.126989	0
HS_H3K27ac_103165	0.110667	0
HS_H3K27ac_103166	0.111725	0
HS_H3K27ac_103172	0.106351	1
HS_H3K27ac_103173	0.117746	0
HS_H3K27ac_103178	0.143684	0
HS_H3K27ac_103179	0.138979	0
HS_H3K27ac_10318	0.189918	0
HS_H3K27ac_103181	0.120083	0
HS_H3K27ac_103183	0.1359	0
HS_H3K27ac_103185	0.161479	0
HS_H3K27ac_103187	0.160742	0
HS_H3K27ac_10319	0.157639	0
HS_H3K27ac_103190	0.155061	0
HS_H3K27ac_103191	0.172005	0
HS_H3K27ac_103193	0.125	0
HS_H3K27ac_103194	0.162885	0
HS_H3K27ac_103195	0.169028	1
HS_H3K27ac_103196	0.165097	0
HS_H3K27ac_103197	0.153772	0
HS_H3K27ac_103200	0.145326	0
HS_H3K27ac_103202	0.161389	0
HS_H3K27ac_103206	0.154824	0
HS_H3K27ac_103208	0.169909	0
HS_H3K27ac_10321	0.141047	0
HS_H3K27ac_103213	0.118885	0
HS_H3K27ac_103216	0.170279	1
HS_H3K27ac_103217	0.165601	0
HS_H3K27ac_103218	0.161427	0
HS_H3K27ac_103219	0.14332	0
HS_H3K27ac_10322	0.142857	0
HS_H3K27ac_103221	0.1518	0
HS_H3K27ac_103222	0.136267	0
HS_H3K27ac_103223	0.165644	0
HS_H3K27ac_103225	0.158796	0
HS_H3K27ac_103226	0.16005	0
HS_H3K27ac_103227	0.161663	0
HS_H3K27ac_103228	0.148822	0
HS_H3K27ac_103229	0.143475	0
HS_H3K27ac_10323	0.163142	1
HS_H3K27ac_103232	0.17338	0
HS_H3K27ac_103233	0.137147	0
HS_H3K27ac_103234	0.137957	0
HS_H3K27ac_103238	0.159915	0
HS_H3K27ac_103239	0.158964	0
HS_H3K27ac_10324	0.125664	0
HS_H3K27ac_103242	0.164884	1
HS_H3K27ac_103243	0.161833	0
HS_H3K27ac_103245	0.159748	0
HS_H3K27ac_103246	0.1391	0
HS_H3K27ac_103248	0.150298	0
HS_H3K27ac_10325	0.15625	1
HS_H3K27ac_103250	0.164981	0
HS_H3K27ac_103251	0.184266	0
HS_H3K27ac_103252	0.179209	0
HS_H3K27ac_103253	0.176299	0
HS_H3K27ac_103254	0.14959	0
HS_H3K27ac_103255	0.161024	0
HS_H3K27ac_103257	0.159172	0
HS_H3K27ac_10326	0.16932	1
HS_H3K27ac_103261	0.186613	0
HS_H3K27ac_103262	0.169905	0
HS_H3K27ac_103264	0.167268	0
HS_H3K27ac_10327	0.144766	0
HS_H3K27ac_103272	0.141455	0
HS_H3K27ac_103276	0.166987	0
HS_H3K27ac_103277	0.159976	0
HS_H3K27ac_103278	0.168057	0
HS_H3K27ac_103279	0.171271	0
HS_H3K27ac_103280	0.156053	0
HS_H3K27ac_103282	0.144645	0
HS_H3K27ac_10329	0.13887	0
HS_H3K27ac_103290	0.0653595	0
HS_H3K27ac_103291	0.132893	0
HS_H3K27ac_103292	0.1015	1
HS_H3K27ac_103293	0.140673	0
HS_H3K27ac_103294	0.188213	1
HS_H3K27ac_10330	0.153042	0
HS_H3K27ac_103300	0.146843	1
HS_H3K27ac_103301	0.0719424	1
HS_H3K27ac_103302	0.146352	0
HS_H3K27ac_103305	0.157126	0
HS_H3K27ac_103308	0.146597	1
HS_H3K27ac_103309	0.157527	0
HS_H3K27ac_10331	0.138761	0
HS_H3K27ac_103311	0.154355	0
HS_H3K27ac_103314	0.16006	1
HS_H3K27ac_103315	0.131183	0
HS_H3K27ac_103316	0.148112	1
HS_H3K27ac_103317	0.13375	0
HS_H3K27ac_103318	0.162328	0
HS_H3K27ac_103319	0.135632	0
HS_H3K27ac_10332	0.13773	0
HS_H3K27ac_103327	0.171525	1
HS_H3K27ac_103339	0.120928	0
HS_H3K27ac_103345	0.126598	0
HS_H3K27ac_103347	0.137874	0
HS_H3K27ac_10335	0.138643	1
HS_H3K27ac_103355	0.133047	0
HS_H3K27ac_103359	0.14807	0
HS_H3K27ac_10336	0.114184	1
HS_H3K27ac_103360	0.159645	1
HS_H3K27ac_103361	0.13029	0
HS_H3K27ac_103362	0.155945	1
HS_H3K27ac_103363	0.158299	0
HS_H3K27ac_103364	0.159954	0
HS_H3K27ac_103365	0.152691	0
HS_H3K27ac_103368	0.165097	0
HS_H3K27ac_103369	0.18093	1
HS_H3K27ac_10337	0.158424	0
HS_H3K27ac_103370	0.13709	0
HS_H3K27ac_103371	0.158858	0
HS_H3K27ac_103373	0.148942	0
HS_H3K27ac_103375	0.134861	0
HS_H3K27ac_103381	0.161143	0
HS_H3K27ac_10339	0.0629371	0
HS_H3K27ac_103390	0.16645	1
HS_H3K27ac_103391	0.155043	0
HS_H3K27ac_103395	0.173342	0
HS_H3K27ac_103396	0.169158	0
HS_H3K27ac_103397	0.166118	0
HS_H3K27ac_103398	0.141679	0
HS_H3K27ac_103400	0.187289	1
HS_H3K27ac_103401	0.140972	1
HS_H3K27ac_103402	0.130255	0
HS_H3K27ac_103403	0.158287	0
HS_H3K27ac_103405	0.169031	0
HS_H3K27ac_103406	0.102041	1
HS_H3K27ac_103407	0.174658	0
HS_H3K27ac_103409	0.188541	1
HS_H3K27ac_10341	0.148867	0
HS_H3K27ac_103410	0.164171	0
HS_H3K27ac_103411	0.177199	0
HS_H3K27ac_103412	0.174328	1
HS_H3K27ac_103413	0.161471	0
HS_H3K27ac_103418	0.159364	0
HS_H3K27ac_10342	0.185388	0
HS_H3K27ac_103424	0.105263	1
HS_H3K27ac_103425	0.160573	0
HS_H3K27ac_103426	0.148223	0
HS_H3K27ac_103428	0.154608	0
HS_H3K27ac_103433	0.137162	0
HS_H3K27ac_103442	0.13876	0
HS_H3K27ac_103444	0.138054	0
HS_H3K27ac_103445	0.120755	1
HS_H3K27ac_103446	0.13164	0
HS_H3K27ac_103447	0.18677	1
HS_H3K27ac_103448	0.145519	0
HS_H3K27ac_103452	0.146187	0
HS_H3K27ac_103456	0.134363	0
HS_H3K27ac_103457	0.148004	0
HS_H3K27ac_103458	0.146067	0
HS_H3K27ac_10346	0.126984	0
HS_H3K27ac_103460	0.15104	0
HS_H3K27ac_103463	0.16	0
HS_H3K27ac_103465	0.158507	0
HS_H3K27ac_10347	0.144876	0
HS_H3K27ac_103470	0.135171	0
HS_H3K27ac_103472	0.190193	0
HS_H3K27ac_103473	0.142456	0
HS_H3K27ac_10348	0.14978	0
HS_H3K27ac_103484	0.143874	0
HS_H3K27ac_103486	0.129744	0
HS_H3K27ac_103488	0.147093	1
HS_H3K27ac_103489	0.171347	0
HS_H3K27ac_10349	0.201113	1
HS_H3K27ac_103490	0.157895	0
HS_H3K27ac_103491	0.133205	0
HS_H3K27ac_103495	0.164908	1
HS_H3K27ac_103496	0.105538	0
HS_H3K27ac_103499	0.142407	0
HS_H3K27ac_103500	0.149719	0
HS_H3K27ac_103501	0.16433	0
HS_H3K27ac_103502	0.153703	0
HS_H3K27ac_103505	0.133885	0
HS_H3K27ac_103506	0.137092	0
HS_H3K27ac_103531	0.14702	0
HS_H3K27ac_103536	0.151776	0
HS_H3K27ac_103537	0.154276	0
HS_H3K27ac_103539	0.132382	0
HS_H3K27ac_103540	0.143339	0
HS_H3K27ac_103557	0.139958	0
HS_H3K27ac_10356	0.166783	0
HS_H3K27ac_10357	0.170183	1
HS_H3K27ac_103574	0.0960347	0
HS_H3K27ac_103575	0.0562771	0
HS_H3K27ac_103576	0.149733	0
HS_H3K27ac_103578	0.146457	1
HS_H3K27ac_103579	0.172137	0
HS_H3K27ac_10358	0.182186	0
HS_H3K27ac_103580	0.0976139	0
HS_H3K27ac_103583	0.150716	0
HS_H3K27ac_103584	0.175082	0
HS_H3K27ac_103586	0.158437	0
HS_H3K27ac_103589	0.146641	1
HS_H3K27ac_103590	0.152085	0
HS_H3K27ac_103591	0.156389	0
HS_H3K27ac_103609	0.155993	0
HS_H3K27ac_103614	0.153255	0
HS_H3K27ac_103617	0.132411	0
HS_H3K27ac_103633	0.163112	0
HS_H3K27ac_103634	0.156711	1
HS_H3K27ac_103635	0.170189	0
HS_H3K27ac_103636	0.132486	0
HS_H3K27ac_103637	0.133878	0
HS_H3K27ac_103638	0.169547	1
HS_H3K27ac_103639	0.157595	0
HS_H3K27ac_103641	0.15206	1
HS_H3K27ac_103642	0.155763	0
HS_H3K27ac_103643	0.147309	1
HS_H3K27ac_103644	0.156667	0
HS_H3K27ac_103648	0.150335	0
HS_H3K27ac_103654	0.143391	0
HS_H3K27ac_103656	0.172112	0
HS_H3K27ac_103657	0.165847	0
HS_H3K27ac_103660	0.16	0
HS_H3K27ac_103663	0.112275	0
HS_H3K27ac_103666	0.137931	0
HS_H3K27ac_103667	0.149247	0
HS_H3K27ac_103669	0.150913	0
HS_H3K27ac_103670	0.161587	0
HS_H3K27ac_103673	0.155146	0
HS_H3K27ac_103674	0.171329	0
HS_H3K27ac_103677	0.123711	0
HS_H3K27ac_10368	0.148571	0
HS_H3K27ac_10369	0.139378	0
HS_H3K27ac_103698	0.129032	1
HS_H3K27ac_103699	0.164797	0
HS_H3K27ac_10370	0.139012	0
HS_H3K27ac_103700	0.0938081	0
HS_H3K27ac_103703	0.157459	0
HS_H3K27ac_103704	0.169721	0
HS_H3K27ac_103705	0.198372	0
HS_H3K27ac_103707	0.163218	1
HS_H3K27ac_103708	0.131902	0
HS_H3K27ac_103709	0.151689	0
HS_H3K27ac_10371	0.147281	0
HS_H3K27ac_103710	0.159211	0
HS_H3K27ac_103711	0.187859	0
HS_H3K27ac_103712	0.158759	0
HS_H3K27ac_103713	0.173506	0
HS_H3K27ac_103714	0.14165	0
HS_H3K27ac_103715	0.139163	0
HS_H3K27ac_103716	0.174446	0
HS_H3K27ac_103717	0.132275	1
HS_H3K27ac_103718	0.137563	0
HS_H3K27ac_10372	0.128641	0
HS_H3K27ac_103720	0.15548	1
HS_H3K27ac_103721	0.103814	0
HS_H3K27ac_103725	0.132943	0
HS_H3K27ac_103726	0.155999	0
HS_H3K27ac_10373	0.167209	0
HS_H3K27ac_103732	0.186068	0
HS_H3K27ac_103735	0.13343	0
HS_H3K27ac_103737	0.164088	1
HS_H3K27ac_103738	0.177397	0
HS_H3K27ac_103739	0.145717	0
HS_H3K27ac_103740	0.180785	0
HS_H3K27ac_103741	0.146847	1
HS_H3K27ac_103742	0.174293	0
HS_H3K27ac_103743	0.176471	0
HS_H3K27ac_103745	0.137636	0
HS_H3K27ac_103746	0.160023	0
HS_H3K27ac_103747	0.122832	0
HS_H3K27ac_103749	0.150583	0
HS_H3K27ac_103752	0.115064	1
HS_H3K27ac_103753	0.122681	0
HS_H3K27ac_103755	0.132009	0
HS_H3K27ac_103758	0.1875	0
HS_H3K27ac_103759	0.167852	1
HS_H3K27ac_10376	0.150538	0
HS_H3K27ac_103760	0.173042	0
HS_H3K27ac_103761	0.144099	1
HS_H3K27ac_103762	0.147132	0
HS_H3K27ac_103763	0.154639	0
HS_H3K27ac_103764	0.157161	0
HS_H3K27ac_103766	0.12529	1
HS_H3K27ac_103767	0.170396	0
HS_H3K27ac_103769	0.124816	0
HS_H3K27ac_103771	0.146416	1
HS_H3K27ac_103772	0.151086	0
HS_H3K27ac_103773	0.168436	0
HS_H3K27ac_103775	0.149288	0
HS_H3K27ac_103776	0.163776	0
HS_H3K27ac_10378	0.154769	0
HS_H3K27ac_103781	0.169336	0
HS_H3K27ac_103782	0.160241	1
HS_H3K27ac_103783	0.149837	0
HS_H3K27ac_103789	0.14625	1
HS_H3K27ac_103790	0.132692	1
HS_H3K27ac_103795	0.127273	0
HS_H3K27ac_103796	0.1417	0
HS_H3K27ac_103797	0.15286	0
HS_H3K27ac_103798	0.114014	0
HS_H3K27ac_103799	0.12634	0
HS_H3K27ac_10380	0.158854	1
HS_H3K27ac_10381	0.134205	0
HS_H3K27ac_103818	0.152249	1
HS_H3K27ac_103819	0.176471	1
HS_H3K27ac_103820	0.168764	0
HS_H3K27ac_103822	0.170792	0
HS_H3K27ac_103823	0.153374	0
HS_H3K27ac_103824	0.158379	0
HS_H3K27ac_103825	0.152635	0
HS_H3K27ac_103826	0.177305	0
HS_H3K27ac_103827	0.170813	0
HS_H3K27ac_103829	0.116176	0
HS_H3K27ac_10383	0.149367	0
HS_H3K27ac_103830	0.151329	0
HS_H3K27ac_103833	0.15592	0
HS_H3K27ac_103834	0.155435	0
HS_H3K27ac_103835	0.173291	0
HS_H3K27ac_103837	0.163093	0
HS_H3K27ac_103838	0.135347	0
HS_H3K27ac_103840	0.149598	0
HS_H3K27ac_103842	0.158006	0
HS_H3K27ac_103843	0.170937	0
HS_H3K27ac_103846	0.171378	0
HS_H3K27ac_103848	0.14457	0
HS_H3K27ac_103849	0.149149	0
HS_H3K27ac_10385	0.155575	0
HS_H3K27ac_103850	0.151678	0
HS_H3K27ac_103852	0.158273	0
HS_H3K27ac_103854	0.095339	1
HS_H3K27ac_103855	0.145925	0
HS_H3K27ac_103859	0.0357143	0
HS_H3K27ac_103861	0.154857	0
HS_H3K27ac_103863	0.151515	0
HS_H3K27ac_103864	0.158094	0
HS_H3K27ac_103865	0.154564	0
HS_H3K27ac_103866	0.161989	0
HS_H3K27ac_103867	0.177948	0
HS_H3K27ac_103868	0.189076	1
HS_H3K27ac_103869	0.181716	0
HS_H3K27ac_103870	0.131373	0
HS_H3K27ac_103873	0.12415	1
HS_H3K27ac_103874	0.15697	1
HS_H3K27ac_103875	0.137795	1
HS_H3K27ac_103876	0.160673	1
HS_H3K27ac_103877	0.139985	0
HS_H3K27ac_103878	0.124809	0
HS_H3K27ac_103879	0.15019	1
HS_H3K27ac_10388	0.0217391	0
HS_H3K27ac_103881	0.16442	0
HS_H3K27ac_103882	0.152651	1
HS_H3K27ac_103883	0.119367	0
HS_H3K27ac_103885	0.155472	0
HS_H3K27ac_103888	0.164943	0
HS_H3K27ac_103889	0.164902	0
HS_H3K27ac_10389	0.133529	0
HS_H3K27ac_103890	0.14743	0
HS_H3K27ac_103895	0.168919	0
HS_H3K27ac_103896	0.143406	0
HS_H3K27ac_103907	0.158014	0
HS_H3K27ac_103908	0.156951	0
HS_H3K27ac_103913	0.149864	0
HS_H3K27ac_103917	0.154799	0
HS_H3K27ac_103921	0.153527	0
HS_H3K27ac_103923	0.126366	1
HS_H3K27ac_103924	0.163144	0
HS_H3K27ac_103926	0.155197	1
HS_H3K27ac_103927	0.134221	0
HS_H3K27ac_103928	0.141504	0
HS_H3K27ac_103929	0.177507	0
HS_H3K27ac_103930	0.157534	1
HS_H3K27ac_103931	0.155826	0
HS_H3K27ac_103932	0.0813288	1
HS_H3K27ac_103933	0.147407	0
HS_H3K27ac_103934	0.136594	0
HS_H3K27ac_103935	0.0918367	0
HS_H3K27ac_103936	0.0923379	0
HS_H3K27ac_103945	0.116215	0
HS_H3K27ac_103954	0.150667	1
HS_H3K27ac_103955	0.142602	1
HS_H3K27ac_103956	0.171429	0
HS_H3K27ac_103957	0.133616	0
HS_H3K27ac_103958	0.198034	0
HS_H3K27ac_103959	0.15625	1
HS_H3K27ac_103961	0.146879	1
HS_H3K27ac_103967	0.132856	0
HS_H3K27ac_103968	0.151122	1
HS_H3K27ac_103970	0.131443	0
HS_H3K27ac_103971	0.151786	0
HS_H3K27ac_103972	0.170687	0
HS_H3K27ac_103975	0.157025	1
HS_H3K27ac_103977	0.15272	0
HS_H3K27ac_103978	0.135	0
HS_H3K27ac_103981	0.149905	0
HS_H3K27ac_103982	0.139557	0
HS_H3K27ac_103983	0.145141	0
HS_H3K27ac_103984	0.123103	0
HS_H3K27ac_103985	0.157518	0
HS_H3K27ac_103990	0.122699	0
HS_H3K27ac_103992	0.173977	1
HS_H3K27ac_103993	0.19697	0
HS_H3K27ac_103994	0.15015	0
HS_H3K27ac_103996	0.1662	0
HS_H3K27ac_103999	0.115385	1
HS_H3K27ac_104000	0.119048	0
HS_H3K27ac_104001	0.199203	0
HS_H3K27ac_104002	0.129162	0
HS_H3K27ac_104004	0.195846	0
HS_H3K27ac_104005	0.149338	0
HS_H3K27ac_104006	0.15625	1
HS_H3K27ac_104007	0.17433	0
HS_H3K27ac_104008	0.167641	0
HS_H3K27ac_104009	0.149254	0
HS_H3K27ac_104010	0.162663	0
HS_H3K27ac_104011	0.132468	0
HS_H3K27ac_104012	0.153398	0
HS_H3K27ac_104013	0.0899908	0
HS_H3K27ac_10402	0.168	0
HS_H3K27ac_104027	0.0316901	0
HS_H3K27ac_104028	0.125899	1
HS_H3K27ac_104029	0.13278	1
HS_H3K27ac_10403	0.135238	0
HS_H3K27ac_104030	0.117647	0
HS_H3K27ac_104031	0.164384	1
HS_H3K27ac_104032	0.194915	1
HS_H3K27ac_104033	0.113924	0
HS_H3K27ac_104044	0.134278	0
HS_H3K27ac_104045	0.11623	0
HS_H3K27ac_104046	0.138495	0
HS_H3K27ac_104047	0.138375	1
HS_H3K27ac_104048	0.143662	0
HS_H3K27ac_104049	0.0837438	0
HS_H3K27ac_10405	0.132174	0
HS_H3K27ac_104050	0.120646	0
HS_H3K27ac_104051	0.187209	0
HS_H3K27ac_104052	0.107709	0
HS_H3K27ac_104053	0.141066	0
HS_H3K27ac_104054	0.0888889	1
HS_H3K27ac_104055	0.0893769	0
HS_H3K27ac_104056	0.156069	1
HS_H3K27ac_104057	0.149521	0
HS_H3K27ac_104058	0.139706	1
HS_H3K27ac_104059	0.131098	0
HS_H3K27ac_104061	0.134189	0
HS_H3K27ac_104066	0.127119	1
HS_H3K27ac_104067	0.173228	1
HS_H3K27ac_104071	0.126943	0
HS_H3K27ac_104074	0.180314	1
HS_H3K27ac_104075	0.125	1
HS_H3K27ac_104080	0.183406	0
HS_H3K27ac_104090	0.164062	0
HS_H3K27ac_104091	0.135965	0
HS_H3K27ac_104094	0.138829	0
HS_H3K27ac_10410	0.155031	0
HS_H3K27ac_104109	0.188799	0
HS_H3K27ac_104110	0.146608	0
HS_H3K27ac_104112	0.153551	1
HS_H3K27ac_104113	0.124172	1
HS_H3K27ac_104115	0.141066	0
HS_H3K27ac_10412	0.113565	0
HS_H3K27ac_104120	0.145769	0
HS_H3K27ac_104121	0.141337	0
HS_H3K27ac_104122	0.156379	1
HS_H3K27ac_104123	0.133333	1
HS_H3K27ac_104124	0.138462	1
HS_H3K27ac_104125	0.151475	1
HS_H3K27ac_104131	0.141469	1
HS_H3K27ac_104132	0.151564	0
HS_H3K27ac_104133	0.158543	0
HS_H3K27ac_104134	0.130999	0
HS_H3K27ac_104135	0.151163	1
HS_H3K27ac_104137	0.173759	0
HS_H3K27ac_104138	0.14986	0
HS_H3K27ac_104139	0.185761	0
HS_H3K27ac_10414	0.0952381	1
HS_H3K27ac_104140	0.130781	0
HS_H3K27ac_10415	0.180438	0
HS_H3K27ac_10418	0.135507	0
HS_H3K27ac_104182	0.171561	0
HS_H3K27ac_104184	0.103839	1
HS_H3K27ac_104187	0.15097	0
HS_H3K27ac_104188	0.164602	1
HS_H3K27ac_104190	0.192177	0
HS_H3K27ac_104194	0.148187	0
HS_H3K27ac_104195	0.184971	0
HS_H3K27ac_104205	0.151865	0
HS_H3K27ac_104207	0.14497	0
HS_H3K27ac_104226	0.174618	0
HS_H3K27ac_104230	0.0861244	0
HS_H3K27ac_104233	0.16712	1
HS_H3K27ac_104236	0.175359	0
HS_H3K27ac_10424	0.143586	0
HS_H3K27ac_104240	0.145788	1
HS_H3K27ac_104245	0.123063	0
HS_H3K27ac_104250	0.123221	0
HS_H3K27ac_104251	0.146267	1
HS_H3K27ac_104269	0.162791	1
HS_H3K27ac_104279	0.166842	0
HS_H3K27ac_10428	0.145851	0
HS_H3K27ac_104284	0.158219	0
HS_H3K27ac_104285	0.156439	1
HS_H3K27ac_104286	0.145266	0
HS_H3K27ac_104287	0.135165	1
HS_H3K27ac_104288	0.155351	1
HS_H3K27ac_104289	0.165899	0
HS_H3K27ac_10429	0.125345	0
HS_H3K27ac_104298	0.157424	0
HS_H3K27ac_104299	0.111565	1
HS_H3K27ac_10430	0.176944	1
HS_H3K27ac_104300	0.0647268	0
HS_H3K27ac_104301	0.160802	0
HS_H3K27ac_104302	0.120536	0
HS_H3K27ac_104303	0.112237	1
HS_H3K27ac_104304	0.15458	0
HS_H3K27ac_104309	0.181604	0
HS_H3K27ac_10431	0.171429	0
HS_H3K27ac_104315	0.167164	1
HS_H3K27ac_104318	0.142438	0
HS_H3K27ac_10432	0.152695	0
HS_H3K27ac_104320	0.166788	0
HS_H3K27ac_104323	0.153846	1
HS_H3K27ac_104330	0.184358	0
HS_H3K27ac_104336	0.125321	0
HS_H3K27ac_104338	0.125	1
HS_H3K27ac_104339	0.137382	0
HS_H3K27ac_10434	0.157895	1
HS_H3K27ac_104340	0.116525	0
HS_H3K27ac_104341	0.0819672	1
HS_H3K27ac_104342	0.11477	0
HS_H3K27ac_104344	0.170479	0
HS_H3K27ac_104346	0.150386	0
HS_H3K27ac_104347	0.170483	0
HS_H3K27ac_104348	0.153695	0
HS_H3K27ac_104356	0.15082	1
HS_H3K27ac_104357	0.147959	0
HS_H3K27ac_10436	0.146139	0
HS_H3K27ac_104360	0.152872	0
HS_H3K27ac_104361	0	1
HS_H3K27ac_104364	0.0444444	1
HS_H3K27ac_104370	0.149082	0
HS_H3K27ac_104371	0.171067	1
HS_H3K27ac_104372	0.163934	0
HS_H3K27ac_104373	0.161697	1
HS_H3K27ac_104375	0.189314	0
HS_H3K27ac_104377	0.133311	1
HS_H3K27ac_104378	0.156088	0
HS_H3K27ac_104379	0.170732	0
HS_H3K27ac_104380	0.179012	1
HS_H3K27ac_104382	0.167715	0
HS_H3K27ac_104385	0.168755	0
HS_H3K27ac_104390	0.187097	1
HS_H3K27ac_104391	0.163206	0
HS_H3K27ac_104393	0.0958213	0
HS_H3K27ac_104396	0.158879	0
HS_H3K27ac_104398	0.148311	0
HS_H3K27ac_104401	0.125357	0
HS_H3K27ac_104402	0.145414	0
HS_H3K27ac_104403	0.151079	0
HS_H3K27ac_104405	0.1794	0
HS_H3K27ac_104406	0.154844	0
HS_H3K27ac_104407	0.155213	0
HS_H3K27ac_104412	0.13986	1
HS_H3K27ac_104420	0.124419	1
HS_H3K27ac_104427	0.0769231	0
HS_H3K27ac_104429	0.14766	1
HS_H3K27ac_104430	0.160827	0
HS_H3K27ac_104431	0.176101	0
HS_H3K27ac_104434	0.166517	0
HS_H3K27ac_104435	0.161636	0
HS_H3K27ac_104436	0.151266	0
HS_H3K27ac_104437	0.158103	0
HS_H3K27ac_104438	0.159876	0
HS_H3K27ac_104439	0.180782	0
HS_H3K27ac_104440	0.139001	0
HS_H3K27ac_104446	0.108232	0
HS_H3K27ac_104450	0.17833	0
HS_H3K27ac_104453	0.134454	1
HS_H3K27ac_104454	0.163636	0
HS_H3K27ac_104455	0.166187	0
HS_H3K27ac_104456	0.169935	0
HS_H3K27ac_104457	0.144851	0
HS_H3K27ac_104462	0.149242	0
HS_H3K27ac_104464	0.167452	0
HS_H3K27ac_104466	0.153323	0
HS_H3K27ac_104469	0.143095	1
HS_H3K27ac_10448	0.154581	0
HS_H3K27ac_104481	0.132048	1
HS_H3K27ac_104482	0.145263	0
HS_H3K27ac_104483	0.157683	1
HS_H3K27ac_104486	0.162658	0
HS_H3K27ac_104490	0.0647517	1
HS_H3K27ac_104491	0.0995416	0
HS_H3K27ac_104492	0.14939	0
HS_H3K27ac_104493	0.148352	1
HS_H3K27ac_104494	0.158273	1
HS_H3K27ac_104495	0.111377	0
HS_H3K27ac_104496	0.147463	1
HS_H3K27ac_104501	0.158333	0
HS_H3K27ac_104502	0.149701	0
HS_H3K27ac_104503	0.149733	1
HS_H3K27ac_104504	0.166832	0
HS_H3K27ac_104505	0.109756	0
HS_H3K27ac_104506	0.166038	1
HS_H3K27ac_104507	0.10229	0
HS_H3K27ac_104508	0.158163	1
HS_H3K27ac_104510	0.0999071	1
HS_H3K27ac_104514	0.132339	1
HS_H3K27ac_104520	0.190581	1
HS_H3K27ac_104521	0.169739	0
HS_H3K27ac_104522	0.162762	0
HS_H3K27ac_104523	0.174603	0
HS_H3K27ac_104525	0.131083	0
HS_H3K27ac_104526	0.177245	0
HS_H3K27ac_104527	0.153952	0
HS_H3K27ac_104528	0.152015	0
HS_H3K27ac_104529	0.14347	0
HS_H3K27ac_104530	0.129032	0
HS_H3K27ac_104531	0.161621	0
HS_H3K27ac_104532	0.153132	0
HS_H3K27ac_104533	0.139069	0
HS_H3K27ac_104537	0.148649	1
HS_H3K27ac_104538	0.152134	0
HS_H3K27ac_104539	0.154212	0
HS_H3K27ac_104540	0.140769	0
HS_H3K27ac_104541	0.125385	0
HS_H3K27ac_104542	0.159147	0
HS_H3K27ac_104543	0.152174	0
HS_H3K27ac_104544	0.15738	1
HS_H3K27ac_104545	0.140527	1
HS_H3K27ac_104547	0.17088	0
HS_H3K27ac_104548	0.135501	0
HS_H3K27ac_104549	0.186373	1
HS_H3K27ac_10455	0.183748	0
HS_H3K27ac_104551	0.173153	1
HS_H3K27ac_104552	0.17477	0
HS_H3K27ac_104556	0.157135	0
HS_H3K27ac_104557	0.171224	0
HS_H3K27ac_104558	0.115211	0
HS_H3K27ac_10456	0.146615	1
HS_H3K27ac_104561	0.128319	0
HS_H3K27ac_104563	0.163978	0
HS_H3K27ac_104564	0.171149	0
HS_H3K27ac_10457	0.133167	0
HS_H3K27ac_104571	0.130941	0
HS_H3K27ac_104572	0.167565	1
HS_H3K27ac_104573	0.145638	0
HS_H3K27ac_104575	0.152557	0
HS_H3K27ac_104576	0.164673	0
HS_H3K27ac_104578	0.167671	0
HS_H3K27ac_104579	0.165175	0
HS_H3K27ac_10458	0.175299	0
HS_H3K27ac_104581	0.152919	0
HS_H3K27ac_104586	0.146154	1
HS_H3K27ac_104589	0.153005	1
HS_H3K27ac_10459	0.124402	0
HS_H3K27ac_104590	0.155468	0
HS_H3K27ac_104591	0.172131	0
HS_H3K27ac_104592	0.161429	0
HS_H3K27ac_104594	0.133455	0
HS_H3K27ac_104595	0.143316	0
HS_H3K27ac_104597	0.15747	0
HS_H3K27ac_104599	0.181102	1
HS_H3K27ac_10460	0.152252	1
HS_H3K27ac_104600	0.160714	0
HS_H3K27ac_104601	0.157866	0
HS_H3K27ac_104602	0.121365	0
HS_H3K27ac_104603	0.107207	1
HS_H3K27ac_104604	0.179739	0
HS_H3K27ac_104609	0.118182	1
HS_H3K27ac_10461	0.143922	1
HS_H3K27ac_104610	0.0772414	0
HS_H3K27ac_104611	0.128141	1
HS_H3K27ac_104612	0.136332	0
HS_H3K27ac_104619	0.161224	0
HS_H3K27ac_10462	0.131579	1
HS_H3K27ac_104620	0.170068	0
HS_H3K27ac_104623	0.114983	0
HS_H3K27ac_104624	0.156472	0
HS_H3K27ac_104625	0.144133	0
HS_H3K27ac_104629	0.161389	0
HS_H3K27ac_10463	0.179291	0
HS_H3K27ac_104630	0.173058	1
HS_H3K27ac_104631	0.160468	0
HS_H3K27ac_104632	0.150394	0
HS_H3K27ac_104633	0.189799	0
HS_H3K27ac_104634	0.165294	1
HS_H3K27ac_104635	0.150252	0
HS_H3K27ac_104637	0.153315	0
HS_H3K27ac_104638	0.171096	0
HS_H3K27ac_10464	0.17192	0
HS_H3K27ac_104640	0.163309	1
HS_H3K27ac_104641	0.141381	0
HS_H3K27ac_104642	0.160735	0
HS_H3K27ac_104643	0.132097	0
HS_H3K27ac_104644	0.166147	0
HS_H3K27ac_104645	0.14824	0
HS_H3K27ac_104647	0.150492	0
HS_H3K27ac_104648	0.162003	0
HS_H3K27ac_104651	0.149925	0
HS_H3K27ac_104653	0.187057	0
HS_H3K27ac_104655	0.163399	0
HS_H3K27ac_104656	0.177984	0
HS_H3K27ac_104657	0.15414	0
HS_H3K27ac_104658	0.151439	0
HS_H3K27ac_104660	0.149439	0
HS_H3K27ac_104662	0.176864	0
HS_H3K27ac_104663	0.166285	0
HS_H3K27ac_104666	0.161755	0
HS_H3K27ac_104667	0.138322	0
HS_H3K27ac_104668	0.154986	0
HS_H3K27ac_104669	0.155242	0
HS_H3K27ac_104671	0.189702	0
HS_H3K27ac_104675	0.16408	0
HS_H3K27ac_104676	0.172596	0
HS_H3K27ac_104678	0.164794	0
HS_H3K27ac_104679	0.14227	0
HS_H3K27ac_104682	0.154599	0
HS_H3K27ac_104684	0.154856	0
HS_H3K27ac_104685	0.138037	1
HS_H3K27ac_104686	0.157576	0
HS_H3K27ac_104687	0.156235	0
HS_H3K27ac_104690	0.147841	0
HS_H3K27ac_104692	0.140655	0
HS_H3K27ac_104693	0.163854	0
HS_H3K27ac_104695	0.167295	0
HS_H3K27ac_104696	0.171319	0
HS_H3K27ac_104697	0.158765	0
HS_H3K27ac_104699	0.192577	0
HS_H3K27ac_104701	0.154116	0
HS_H3K27ac_104702	0.158864	0
HS_H3K27ac_104708	0.16955	1
HS_H3K27ac_104709	0.163636	1
HS_H3K27ac_10471	0.145394	0
HS_H3K27ac_104710	0.15756	0
HS_H3K27ac_104715	0.171941	0
HS_H3K27ac_104718	0.147687	0
HS_H3K27ac_10472	0.126214	0
HS_H3K27ac_104720	0.171296	0
HS_H3K27ac_104721	0.164179	1
HS_H3K27ac_104722	0.154235	0
HS_H3K27ac_104724	0.158832	0
HS_H3K27ac_104725	0.162031	0
HS_H3K27ac_104729	0.167286	0
HS_H3K27ac_104730	0.154943	1
HS_H3K27ac_104731	0.173981	0
HS_H3K27ac_104733	0.138638	0
HS_H3K27ac_104734	0.188755	1
HS_H3K27ac_104735	0.177561	0
HS_H3K27ac_104736	0.135579	0
HS_H3K27ac_104739	0.180288	0
HS_H3K27ac_10474	0.19469	0
HS_H3K27ac_104741	0.155009	0
HS_H3K27ac_104744	0.164246	0
HS_H3K27ac_104746	0.183039	0
HS_H3K27ac_104747	0.163457	0
HS_H3K27ac_104749	0.12341	1
HS_H3K27ac_10475	0.140162	1
HS_H3K27ac_104750	0.125	1
HS_H3K27ac_104754	0.156304	0
HS_H3K27ac_104756	0.154143	0
HS_H3K27ac_10476	0.169216	0
HS_H3K27ac_104762	0.153425	0
HS_H3K27ac_104763	0.148148	1
HS_H3K27ac_104764	0.15004	1
HS_H3K27ac_104765	0.164103	0
HS_H3K27ac_104766	0.158524	1
HS_H3K27ac_104767	0.175797	0
HS_H3K27ac_104768	0.169811	0
HS_H3K27ac_104769	0.163335	0
HS_H3K27ac_104771	0.140371	0
HS_H3K27ac_104773	0.168768	0
HS_H3K27ac_104779	0.149275	0
HS_H3K27ac_10478	0.171086	0
HS_H3K27ac_10479	0.187573	0
HS_H3K27ac_104791	0.171131	0
HS_H3K27ac_104792	0.163283	0
HS_H3K27ac_104793	0.15279	0
HS_H3K27ac_104794	0.16291	0
HS_H3K27ac_104795	0.150852	0
HS_H3K27ac_104796	0.177251	1
HS_H3K27ac_104797	0.160359	0
HS_H3K27ac_104798	0.169828	1
HS_H3K27ac_104799	0.140737	1
HS_H3K27ac_10480	0.152859	1
HS_H3K27ac_104800	0.1782	0
HS_H3K27ac_104801	0.18112	0
HS_H3K27ac_104802	0.185331	0
HS_H3K27ac_104808	0.131862	0
HS_H3K27ac_10481	0.122363	1
HS_H3K27ac_104814	0.136494	0
HS_H3K27ac_104815	0.14178	0
HS_H3K27ac_104816	0.138514	0
HS_H3K27ac_104817	0.13624	0
HS_H3K27ac_104818	0.134367	1
HS_H3K27ac_104819	0.142461	0
HS_H3K27ac_10482	0.148684	1
HS_H3K27ac_104820	0.182339	0
HS_H3K27ac_104821	0.152	1
HS_H3K27ac_104827	0.171797	0
HS_H3K27ac_104828	0.15289	0
HS_H3K27ac_104829	0.113095	0
HS_H3K27ac_10483	0.179079	0
HS_H3K27ac_104830	0.144512	0
HS_H3K27ac_104831	0.142971	0
HS_H3K27ac_104834	0.160584	1
HS_H3K27ac_104835	0.0597015	1
HS_H3K27ac_104836	0.146351	0
HS_H3K27ac_10484	0.176205	1
HS_H3K27ac_104841	0.161359	0
HS_H3K27ac_104842	0.160615	0
HS_H3K27ac_104844	0.164087	0
HS_H3K27ac_104846	0.170043	0
HS_H3K27ac_104847	0.160687	0
HS_H3K27ac_104849	0.17713	0
HS_H3K27ac_10485	0.155015	1
HS_H3K27ac_104854	0.140766	0
HS_H3K27ac_104855	0.164686	0
HS_H3K27ac_104856	0.159184	0
HS_H3K27ac_104857	0.154049	0
HS_H3K27ac_104858	0.170918	0
HS_H3K27ac_104859	0.170692	0
HS_H3K27ac_10486	0.116	0
HS_H3K27ac_104861	0.148872	1
HS_H3K27ac_104862	0.167934	0
HS_H3K27ac_104869	0.179769	0
HS_H3K27ac_104871	0.170012	0
HS_H3K27ac_104872	0.156104	0
HS_H3K27ac_104874	0.127335	0
HS_H3K27ac_104875	0.123701	0
HS_H3K27ac_104876	0.155247	1
HS_H3K27ac_104877	0.142722	1
HS_H3K27ac_104878	0.160695	1
HS_H3K27ac_104879	0.171946	1
HS_H3K27ac_10488	0.164228	0
HS_H3K27ac_104880	0.157009	0
HS_H3K27ac_104881	0.148103	0
HS_H3K27ac_104883	0.171765	0
HS_H3K27ac_104884	0.158594	0
HS_H3K27ac_104885	0.149001	0
HS_H3K27ac_104886	0.158974	1
HS_H3K27ac_104888	0.16366	0
HS_H3K27ac_104889	0.165323	0
HS_H3K27ac_10489	0.154676	0
HS_H3K27ac_104890	0.145015	0
HS_H3K27ac_104891	0.165179	0
HS_H3K27ac_104895	0.170845	0
HS_H3K27ac_104898	0.138716	0
HS_H3K27ac_10490	0.167315	0
HS_H3K27ac_104901	0.140065	0
HS_H3K27ac_10491	0.15011	1
HS_H3K27ac_10492	0.137255	1
HS_H3K27ac_10493	0.190022	0
HS_H3K27ac_10494	0.175805	0
HS_H3K27ac_10495	0.184824	0
HS_H3K27ac_10496	0.167059	1
HS_H3K27ac_10497	0.167973	0
HS_H3K27ac_105057	0.136364	0
HS_H3K27ac_105060	0.131148	0
HS_H3K27ac_105292	0.140865	0
HS_H3K27ac_105301	0.194175	0
HS_H3K27ac_105303	0.141509	0
HS_H3K27ac_105307	0.172205	0
HS_H3K27ac_105313	0.10498	0
HS_H3K27ac_10533	0.16645	0
HS_H3K27ac_10534	0.150735	0
HS_H3K27ac_105341	0.176	0
HS_H3K27ac_10535	0.158858	0
HS_H3K27ac_10539	0.081854	1
HS_H3K27ac_10540	0.156951	1
HS_H3K27ac_105405	0.157143	0
HS_H3K27ac_105409	0.131004	0
HS_H3K27ac_10541	0.169884	1
HS_H3K27ac_105410	0.084507	0
HS_H3K27ac_105413	0.0781759	0
HS_H3K27ac_10542	0.133858	1
HS_H3K27ac_10543	0.132308	1
HS_H3K27ac_10544	0.148287	0
HS_H3K27ac_10547	0.148148	1
HS_H3K27ac_10551	0.157205	0
HS_H3K27ac_10552	0.163059	0
HS_H3K27ac_10553	0.109375	0
HS_H3K27ac_105548	0.183544	0
HS_H3K27ac_105549	0.129139	0
HS_H3K27ac_10555	0.18802	1
HS_H3K27ac_105550	0.198675	0
HS_H3K27ac_10557	0.176606	0
HS_H3K27ac_105573	0.15194	0
HS_H3K27ac_105575	0.172287	0
HS_H3K27ac_10558	0.185446	0
HS_H3K27ac_10559	0.16152	0
HS_H3K27ac_105629	0.0898204	0
HS_H3K27ac_10567	0.168874	1
HS_H3K27ac_10568	0.138322	0
HS_H3K27ac_10569	0.155158	0
HS_H3K27ac_10570	0.148936	0
HS_H3K27ac_105700	0.158034	0
HS_H3K27ac_105702	0.145477	0
HS_H3K27ac_105703	0.152715	0
HS_H3K27ac_105704	0.127496	0
HS_H3K27ac_105705	0.131183	0
HS_H3K27ac_105706	0.155738	1
HS_H3K27ac_105707	0.158166	1
HS_H3K27ac_105708	0.140149	0
HS_H3K27ac_105709	0.163619	0
HS_H3K27ac_105710	0.177191	0
HS_H3K27ac_105712	0.165809	1
HS_H3K27ac_105713	0.145973	0
HS_H3K27ac_105717	0.17613	0
HS_H3K27ac_105718	0.159737	0
HS_H3K27ac_10572	0.152941	0
HS_H3K27ac_10573	0.153893	0
HS_H3K27ac_10575	0.158371	1
HS_H3K27ac_10579	0.170462	0
HS_H3K27ac_105798	0.16621	1
HS_H3K27ac_105802	0.125	0
HS_H3K27ac_105804	0.118048	0
HS_H3K27ac_105812	0.159145	0
HS_H3K27ac_105813	0.144144	0
HS_H3K27ac_105820	0.137589	0
HS_H3K27ac_105822	0.15276	0
HS_H3K27ac_105823	0.173441	1
HS_H3K27ac_105827	0.147232	1
HS_H3K27ac_10583	0.162844	0
HS_H3K27ac_105840	0.134047	0
HS_H3K27ac_105851	0.155515	1
HS_H3K27ac_105852	0.14936	1
HS_H3K27ac_105853	0.155477	0
HS_H3K27ac_105854	0.113043	1
HS_H3K27ac_105855	0.175439	1
HS_H3K27ac_105856	0.166152	0
HS_H3K27ac_105859	0.163575	0
HS_H3K27ac_10586	0.165741	0
HS_H3K27ac_105860	0.185759	0
HS_H3K27ac_105866	0.160094	0
HS_H3K27ac_105868	0.170261	0
HS_H3K27ac_105869	0.149299	0
HS_H3K27ac_10587	0.150797	0
HS_H3K27ac_105870	0.16242	0
HS_H3K27ac_105872	0.154742	1
HS_H3K27ac_105873	0.182956	0
HS_H3K27ac_105874	0.189934	0
HS_H3K27ac_105875	0.156738	1
HS_H3K27ac_105876	0.169421	0
HS_H3K27ac_105877	0.166056	0
HS_H3K27ac_105880	0.143498	1
HS_H3K27ac_105881	0.147206	0
HS_H3K27ac_105883	0.184255	0
HS_H3K27ac_105884	0.150727	0
HS_H3K27ac_105887	0.157285	0
HS_H3K27ac_105888	0.162179	0
HS_H3K27ac_105891	0.156835	0
HS_H3K27ac_105893	0.159499	0
HS_H3K27ac_105894	0.194413	0
HS_H3K27ac_105895	0.188873	1
HS_H3K27ac_105896	0.163107	1
HS_H3K27ac_105897	0.154464	0
HS_H3K27ac_105900	0.147616	0
HS_H3K27ac_105908	0.142798	0
HS_H3K27ac_105909	0.145912	0
HS_H3K27ac_105911	0.158199	0
HS_H3K27ac_105912	0.14652	0
HS_H3K27ac_105914	0.146905	0
HS_H3K27ac_105915	0.184923	0
HS_H3K27ac_105917	0.0858586	0
HS_H3K27ac_105925	0.175174	0
HS_H3K27ac_105928	0.157444	1
HS_H3K27ac_105929	0.167605	0
HS_H3K27ac_10593	0.152346	0
HS_H3K27ac_105930	0.16169	0
HS_H3K27ac_105931	0.159189	0
HS_H3K27ac_105933	0.178484	1
HS_H3K27ac_105934	0.167802	0
HS_H3K27ac_105935	0.135743	0
HS_H3K27ac_105938	0.197802	0
HS_H3K27ac_105939	0.151707	0
HS_H3K27ac_105940	0.193428	0
HS_H3K27ac_105941	0.148741	0
HS_H3K27ac_105942	0.138614	1
HS_H3K27ac_105943	0.159502	0
HS_H3K27ac_105944	0.135922	0
HS_H3K27ac_105945	0.183639	1
HS_H3K27ac_105946	0.144665	0
HS_H3K27ac_105947	0.173546	0
HS_H3K27ac_105948	0.158458	0
HS_H3K27ac_105949	0.145353	1
HS_H3K27ac_105950	0.18309	0
HS_H3K27ac_105951	0.168651	0
HS_H3K27ac_105953	0.156794	1
HS_H3K27ac_105957	0.100851	0
HS_H3K27ac_105958	0.156095	0
HS_H3K27ac_105959	0.123994	0
HS_H3K27ac_105964	0.160411	1
HS_H3K27ac_105968	0.170058	0
HS_H3K27ac_105972	0.168199	0
HS_H3K27ac_105977	0.0820124	0
HS_H3K27ac_105981	0.117959	0
HS_H3K27ac_105989	0.151829	0
HS_H3K27ac_105991	0.145287	0
HS_H3K27ac_105992	0.123464	1
HS_H3K27ac_105993	0.154266	1
HS_H3K27ac_105994	0.134404	1
HS_H3K27ac_105995	0.125367	0
HS_H3K27ac_105996	0.171486	1
HS_H3K27ac_105999	0.172157	0
HS_H3K27ac_106000	0.143144	0
HS_H3K27ac_106002	0.138462	0
HS_H3K27ac_106003	0.162841	0
HS_H3K27ac_106005	0.157688	0
HS_H3K27ac_106006	0.167201	0
HS_H3K27ac_106008	0.18068	0
HS_H3K27ac_10602	0.161157	1
HS_H3K27ac_106022	0.129534	1
HS_H3K27ac_106029	0.13355	0
HS_H3K27ac_10603	0.133725	0
HS_H3K27ac_10604	0.139864	0
HS_H3K27ac_106047	0.150449	1
HS_H3K27ac_106049	0.153191	1
HS_H3K27ac_106050	0.170274	0
HS_H3K27ac_106055	0.111111	0
HS_H3K27ac_106056	0.16	0
HS_H3K27ac_106057	0.196883	0
HS_H3K27ac_106058	0.173434	0
HS_H3K27ac_106059	0.159398	0
HS_H3K27ac_10606	0.178958	0
HS_H3K27ac_106060	0.155083	1
HS_H3K27ac_106061	0.168294	0
HS_H3K27ac_106062	0.124601	0
HS_H3K27ac_106063	0.16676	1
HS_H3K27ac_106064	0.159847	0
HS_H3K27ac_106065	0.164477	0
HS_H3K27ac_106066	0.164218	0
HS_H3K27ac_106067	0.179967	1
HS_H3K27ac_106068	0.155098	0
HS_H3K27ac_106070	0.12605	0
HS_H3K27ac_106071	0.177188	0
HS_H3K27ac_106072	0.148766	0
HS_H3K27ac_106074	0.147028	1
HS_H3K27ac_106075	0.159311	1
HS_H3K27ac_106076	0.139785	0
HS_H3K27ac_106077	0.192529	0
HS_H3K27ac_106078	0.173852	0
HS_H3K27ac_106079	0.16126	0
HS_H3K27ac_10608	0.153955	1
HS_H3K27ac_106080	0.155701	0
HS_H3K27ac_106082	0.143478	0
HS_H3K27ac_106084	0.150512	0
HS_H3K27ac_106085	0.167819	0
HS_H3K27ac_106086	0.171331	0
HS_H3K27ac_106088	0.141228	1
HS_H3K27ac_106089	0.170775	0
HS_H3K27ac_10609	0.167981	1
HS_H3K27ac_106090	0.167314	0
HS_H3K27ac_106099	0.137607	0
HS_H3K27ac_10610	0.180441	0
HS_H3K27ac_106101	0.157288	0
HS_H3K27ac_106102	0.13787	0
HS_H3K27ac_106103	0.160209	0
HS_H3K27ac_106104	0.149745	0
HS_H3K27ac_106105	0.149723	0
HS_H3K27ac_106106	0.16978	0
HS_H3K27ac_106111	0.186827	0
HS_H3K27ac_106112	0.135758	1
HS_H3K27ac_106113	0.137992	1
HS_H3K27ac_106114	0.139426	0
HS_H3K27ac_106118	0.156184	0
HS_H3K27ac_106119	0.124451	1
HS_H3K27ac_106120	0.173369	0
HS_H3K27ac_106121	0.153703	0
HS_H3K27ac_106122	0.146705	1
HS_H3K27ac_106123	0.130025	0
HS_H3K27ac_106127	0.14726	1
HS_H3K27ac_106129	0.0625	0
HS_H3K27ac_10613	0.156573	0
HS_H3K27ac_106134	0.155779	0
HS_H3K27ac_106137	0.142674	0
HS_H3K27ac_106138	0.132054	1
HS_H3K27ac_106142	0.149956	0
HS_H3K27ac_106143	0.107981	1
HS_H3K27ac_106153	0.163048	0
HS_H3K27ac_106156	0.117349	1
HS_H3K27ac_106157	0.152174	1
HS_H3K27ac_106158	0.177747	0
HS_H3K27ac_106159	0.144834	1
HS_H3K27ac_10616	0.119708	0
HS_H3K27ac_106160	0.178114	0
HS_H3K27ac_106161	0.160753	1
HS_H3K27ac_106162	0.160202	0
HS_H3K27ac_106164	0.124778	1
HS_H3K27ac_106166	0.16133	0
HS_H3K27ac_106167	0.187668	0
HS_H3K27ac_106168	0.158245	0
HS_H3K27ac_106186	0.121634	1
HS_H3K27ac_106189	0.118862	1
HS_H3K27ac_10619	0.144918	0
HS_H3K27ac_106190	0.146313	0
HS_H3K27ac_106202	0.183861	0
HS_H3K27ac_106203	0.142788	1
HS_H3K27ac_106204	0.143984	0
HS_H3K27ac_106206	0.176355	0
HS_H3K27ac_106207	0.145455	0
HS_H3K27ac_106209	0.170243	1
HS_H3K27ac_10621	0.146858	0
HS_H3K27ac_106210	0.150442	0
HS_H3K27ac_106214	0.1685	0
HS_H3K27ac_106217	0.152654	0
HS_H3K27ac_106218	0.116901	0
HS_H3K27ac_106219	0.139613	0
HS_H3K27ac_106220	0.165145	0
HS_H3K27ac_106221	0.154734	0
HS_H3K27ac_106225	0.172308	0
HS_H3K27ac_106231	0.177106	1
HS_H3K27ac_106232	0.159826	0
HS_H3K27ac_106233	0.154863	1
HS_H3K27ac_106234	0.155188	0
HS_H3K27ac_106236	0.144078	0
HS_H3K27ac_106237	0.133529	0
HS_H3K27ac_106238	0.12605	0
HS_H3K27ac_106239	0.126706	0
HS_H3K27ac_10624	0.169554	0
HS_H3K27ac_106244	0.144753	0
HS_H3K27ac_106245	0.155356	0
HS_H3K27ac_106246	0.114268	1
HS_H3K27ac_106249	0.0982033	0
HS_H3K27ac_106250	0.128051	0
HS_H3K27ac_106259	0.118705	0
HS_H3K27ac_10626	0.102412	0
HS_H3K27ac_106261	0.158273	0
HS_H3K27ac_106262	0.127258	0
HS_H3K27ac_106263	0.144309	0
HS_H3K27ac_106271	0.160414	0
HS_H3K27ac_106279	0.139211	1
HS_H3K27ac_106280	0.153101	0
HS_H3K27ac_106281	0.149688	0
HS_H3K27ac_106287	0.114183	0
HS_H3K27ac_106291	0.152653	0
HS_H3K27ac_106293	0.16156	1
HS_H3K27ac_106299	0.127913	1
HS_H3K27ac_106301	0.116642	1
HS_H3K27ac_106302	0.119048	0
HS_H3K27ac_106306	0.140584	1
HS_H3K27ac_106307	0.148749	1
HS_H3K27ac_106314	0.118694	0
HS_H3K27ac_106315	0.151703	0
HS_H3K27ac_106318	0.163793	0
HS_H3K27ac_106319	0.149985	0
[truncated: 37,252 more rows]
