# Supplementary material for: Transposable elements are the primary source of novelty in primate gene regulation
Source: Genome Res. 2017 Oct;27(10):1623–33. doi: 10.1101/gr.218149.116 (PMC5630026; doi:10.1101/gr.218149.116)
Supplement: Supplemental Material [file supp_gr.218149.116_Supplemental_Table_S10.xlsx]

## Sheet: Sheet1
# Summary statistics of analyses of TE recruitment in evolved and conserved CREs
	NUMBER	FRACTION
ALL TEs	5291824
TEs overlapping human CRE	62537	0.0118177
TEs overlapping human CRE, 6 way orthologs	12569
TEs overlapping human CRE, 6 way orthologs, recently evolved	7615	0.744088
Recently evolved CREs	14643
Recently evolved CREs, with TE insertion	5863	0.400396
